# Supplementary material for: Uncovering the electrical synapse proteome in retinal neurons via in vivo proximity labeling
Source: eLife. 2026 May 20;14:RP105935. doi: 10.7554/eLife.105935 (PMC13189625; doi:10.7554/eLife.105935)
Supplement: Supplementary file 1. [file elife-105935-supp1.xlsx]

## Sheet: Cx35.1 proximity proteome all
Full report of proteins captured in two experiments targeting Cx35.1 in zebrafish retina. Data are sorted by (peak area Tg:Cx35-turboID/peak area control) and #peptides in Tg:Cx35-turboID samples
	Experiments included
	Zf-1 Tg:Cx35-turboID in AB background - experiment 1
	Cntrl-1 WT AB - experiment 1
	Zf-2 Tg:Cx35-turboID in AB background - experiment 2
	Cntrl-2 WT AB - experiment 2
Accession	Description	Σ# Unique Peptides Zf1	Σ# Peptides Zf1	Σ# PSMs Zf1	Area Zf1	Area Cntrl1	A/B Zf1	Score Zf1	Coverage Zf1	# Peptides Zf1	# PSM Zf1	Score Cntrl1	Coverage Cntrl1	# Peptides Cntrl1	# PSM Cntrl1	Σ# Unique Peptides Zf2	Σ# Peptides Zf2	Σ# PSMs Zf2	Area Zf2	Area Cntrl2	A/B Zf2	Score Zf2	Coverage Zf2	# Peptides Zf2	# PSM Zf2	Score Cntrl2	Coverage Cntrl2	# Peptides Cntrl2	# PSM Cntrl2	Mean A/B	Mean pep Zf	Mean area Zf
A0A8M3AZ90	tyrosine-protein phosphatase non-receptor type 13 isoform X1 OS=Danio rerio OX=7955 GN=ptpn20 PE=3 SV=1 - [A0A8M3AZ90_DANRE]	45	45	55	1.31397e+08	0		121.509	22.1	45	55					30	30	33	4.91421e+07	0		69.2269	16.67	30	33					#DIV/0!	37.5	9.02693e+07
A0A8M3BB23	tight junction protein ZO-1 isoform X1 OS=Danio rerio OX=7955 GN=tjp1a PE=3 SV=1 - [A0A8M3BB23_DANRE]	16	36	44	1.88775e+08	0		92.7051	18.97	36	44					7	19	23	6.81825e+07	0		41.7031	12.86	19	23					#DIV/0!	27.5	1.28479e+08
A0A8M3B4S3	syntaxin-binding protein 4 isoform X1 OS=Danio rerio OX=7955 GN=stxbp4 PE=4 SV=1 - [A0A8M3B4S3_DANRE]	27	27	38	3.6534e+08	0		89.596	36.05	27	38					27	27	32	1.68428e+08	0		58.6659	37.25	27	32					#DIV/0!	27	2.66884e+08
A0A8M9PHF8	tight junction protein ZO-1 isoform X1 OS=Danio rerio OX=7955 GN=tjp1b PE=3 SV=1 - [A0A8M9PHF8_DANRE]	15	35	41	1.88775e+08	0		92.9042	17.28	35	41					5	17	20	6.81825e+07	0		37.2467	10.08	17	20					#DIV/0!	26	1.28479e+08
A0A8M3B637	tight junction protein ZO-2 isoform X1 OS=Danio rerio OX=7955 GN=tjp2a PE=3 SV=1 - [A0A8M3B637_DANRE]	26	30	36	1.29146e+08	0		67.2816	24.14	30	36					16	19	22	4.71061e+07	0		42.6339	16.64	19	22					#DIV/0!	24.5	8.81259e+07
A0A8M9PJP1	uncharacterized protein si:ch211-13f8.1 isoform X1 OS=Danio rerio OX=7955 GN=si:ch211-13f8.1 PE=4 SV=1 - [A0A8M9PJP1_DANRE]	21	21	23	3.63729e+07	0		53.3971	22.1	21	23					9	9	10	1.31839e+07	0		24.022	10.21	9	10					#DIV/0!	15	2.47784e+07
A0A8M3AUX4	tight junction protein ZO-2-like OS=Danio rerio OX=7955 GN=LOC103911473 PE=3 SV=1 - [A0A8M3AUX4_DANRE]	12	16	20	1.20284e+08	0		34.5711	18.89	16	20					8	11	12	4.03105e+07	0		25.8747	14.36	11	12					#DIV/0!	13.5	8.02973e+07
A0A8N7T637	syntaxin-binding protein 4-like isoform X1 OS=Danio rerio OX=7955 GN=si:dkeyp-72e1.9 PE=4 SV=1 - [A0A8N7T637_DANRE]	14	14	14	6.51648e+07	0		29.8868	22.28	14	14					10	10	12	36802233	0		22.3267	17.63	10	12					#DIV/0!	12	5.09835e+07
A0A8M6Z0B7	multiple PDZ domain protein isoform X1 OS=Danio rerio OX=7955 GN=mpdz PE=4 SV=1 - [A0A8M6Z0B7_DANRE]	19	19	20	2.54663e+07	0		40.3634	11.48	19	20					4	4	5	5.05033e+06	0		9.78	2.82	4	5					#DIV/0!	11.5	1.52583e+07
A0A8M3AQE4	myosin phosphatase Rho-interacting protein-like isoform X1 OS=Danio rerio OX=7955 GN=LOC101884217 PE=4 SV=1 - [A0A8M3AQE4_DANRE]															7	7	7	1.49754e+07	0		13.6968	5.04	7	7					#DIV/0!	7	1.49754e+07
M1EVR1	Potassium/chloride cotransporter kcc2 OS=Danio rerio OX=7955 GN=SLC12A5 PE=2 SV=1 - [M1EVR1_DANRE]	7	10	11	2.66639e+07	0		25.5586	10.3	10	11					2	3	3	6.47767e+06	0		3.93144	2.95	3	3					#DIV/0!	6.5	1.65708e+07
A0A8M9QHY1	Anion exchange protein OS=Danio rerio OX=7955 GN=slc4a10a PE=3 SV=1 - [A0A8M9QHY1_DANRE]	6	6	7	1.51675e+07	0		10.2095	5.95	6	7																			#DIV/0!	6	1.51675e+07
A0A8M3AN32	uncharacterized protein KIAA1614 isoform X1 OS=Danio rerio OX=7955 GN=si:dkey-121a11.3 PE=4 SV=1 - [A0A8M3AN32_DANRE]	5	5	5	2.63027e+07	0		10.7765	5.57	5	5					5	5	5	8.97256e+06	0		10.8924	5.47	5	5					#DIV/0!	5	1.76376e+07
A0A8M9PG19	TRAF2 and NCK-interacting protein kinase isoform X1 OS=Danio rerio OX=7955 GN=tnikb PE=4 SV=1 - [A0A8M9PG19_DANRE]	5	5	5	1.29714e+07	0		4.87441	3.86	5	5																			#DIV/0!	5	1.29714e+07
A0A8M6YW17	fibrillin-1 OS=Danio rerio OX=7955 GN=fbn1 PE=4 SV=1 - [A0A8M6YW17_DANRE]	5	5	5	6.6972e+06	0		11.8253	2.13	5	5																			#DIV/0!	5	6.6972e+06
A0A8M2BIB8	inactive ubiquitin carboxyl-terminal hydrolase 53 isoform X1 OS=Danio rerio OX=7955 GN=usp53b PE=4 SV=1 - [A0A8M2BIB8_DANRE]	6	6	6	7.75886e+06	0		14.336	6.41	6	6					4	4	4	3.15308e+06	0		6.7595	4.76	4	4					#DIV/0!	5	5.45597e+06
A0A8M9PQ24	afadin isoform X1 OS=Danio rerio OX=7955 GN=mllt4a PE=4 SV=1 - [A0A8M9PQ24_DANRE]	6	6	6	1.12493e+08	0		12.2619	4.04	6	6					3	3	3	4.08962e+06	0		6.79436	2.23	3	3					#DIV/0!	4.5	5.82911e+07
A0A8M9Q103	solute carrier family 12 member 5 isoform X1 OS=Danio rerio OX=7955 GN=si:ch211-59d13.2 PE=3 SV=1 - [A0A8M9Q103_DANRE]	4	7	8	1.67317e+07	0		12.8208	5.9	7	8					1	2	2	4.33662e+06	0		1.8737	1.59	2	2					#DIV/0!	4.5	1.05342e+07
A0A8M2B3R6	synergin gamma isoform X1 OS=Danio rerio OX=7955 GN=synrg PE=4 SV=1 - [A0A8M2B3R6_DANRE]	6	6	6	2.95389e+07	0		11.4725	4.97	6	6					2	2	2	7.65965e+06	0		5.34809	1.63	2	2					#DIV/0!	4	1.85993e+07
A0A8M9QA64	membrane-associated guanylate kinase, WW and PDZ domain-containing protein 1 isoform X1 OS=Danio rerio OX=7955 GN=LOC556872 PE=4 SV=1 - [A0A8M9QA64_DANRE]	5	5	5	1.45186e+07	0		5.62993	3.46	5	5					2	3	3	5.50075e+06	0		5.4946	2.04	3	3					#DIV/0!	4	1.00097e+07
A0A8M3B0R8	Gap junction protein OS=Danio rerio OX=7955 GN=LOC100331216 PE=3 SV=1 - [A0A8M3B0R8_DANRE]	3	3	5	6.97739e+07	0		13.1103	11.84	3	5					3	3	4	4.76779e+07	0		7.63238	12.17	3	4					#DIV/0!	3	5.87259e+07
A0A8M2BA14	solute carrier family 12 member 7 isoform X1 OS=Danio rerio OX=7955 GN=slc12a7b PE=3 SV=1 - [A0A8M2BA14_DANRE]	2	3	3	1.25939e+07	0		7.80376	3.6	3	3																			#DIV/0!	3	1.25939e+07
A0A8M9PXZ0	connector enhancer of kinase suppressor of ras 2 isoform X1 OS=Danio rerio OX=7955 GN=cnksr2a PE=3 SV=1 - [A0A8M9PXZ0_DANRE]	3	3	3	9.43962e+06	0		6.96667	3	3	3																			#DIV/0!	3	9.43962e+06
A0A8M1PET4	A-kinase anchor protein 8-like OS=Danio rerio OX=7955 GN=akap8l PE=3 SV=1 - [A0A8M1PET4_DANRE]															3	3	3	7.83385e+06	0		6.07634	5.12	3	3					#DIV/0!	3	7.83385e+06
A0A8M9PD17	collagen alpha-1(V) chain isoform X1 OS=Danio rerio OX=7955 GN=col5a1 PE=4 SV=1 - [A0A8M9PD17_DANRE]	2	3	3	7.15821e+06	0		6.18636	1.58	3	3																			#DIV/0!	3	7.15821e+06
A0A8M6YZ78	uncharacterized protein C9orf172 homolog OS=Danio rerio OX=7955 GN=zmp:0000000794 PE=4 SV=1 - [A0A8M6YZ78_DANRE]															3	3	3	3.73446e+06	0		2.45422	3	3	3					#DIV/0!	3	3.73446e+06
A0A8M6YY94	potassium voltage-gated channel subfamily H member 2 OS=Danio rerio OX=7955 GN=kcnh2b PE=4 SV=1 - [A0A8M6YY94_DANRE]	2	2	2	5.23193e+06	0		4.22314	1.95	2	2					3	3	3	1.817e+06	0		5.80453	3.31	3	3					#DIV/0!	2.5	3.52447e+06
A0A8N7TBX7	ATP-dependent 6-phosphofructokinase OS=Danio rerio OX=7955 GN=pfkla PE=3 SV=1 - [A0A8N7TBX7_DANRE]															1	2	2	80899677	0		4.46661	3.33	2	2					#DIV/0!	2	80899677
A0A8M2BA28	collagen alpha-1(XI) chain isoform X1 OS=Danio rerio OX=7955 GN=col11a1a PE=4 SV=1 - [A0A8M2BA28_DANRE]	1	2	2	1.14338e+07	0		1.74131	0.94	2	2																			#DIV/0!	2	1.14338e+07
A0A8M9PY69	multiple PDZ domain protein isoform X1 OS=Danio rerio OX=7955 GN=si:dkey-92j12.5 PE=4 SV=1 - [A0A8M9PY69_DANRE]															2	2	2	8.19652e+06	0		4.90238	1.56	2	2					#DIV/0!	2	8.19652e+06
A0A8M9P9V0	membrane-associated guanylate kinase, WW and PDZ domain-containing protein 1 isoform X1 OS=Danio rerio OX=7955 GN=magixa PE=4 SV=1 - [A0A8M9P9V0_DANRE]															1	2	3	6.81554e+06	0		4.62192	2.06	2	3					#DIV/0!	2	6.81554e+06
Q7SXP0	Vesicle-trafficking protein SEC22b-B OS=Danio rerio OX=7955 GN=sec22bb PE=2 SV=1 - [S22BB_DANRE]	2	2	2	6.32955e+06	0		4.794	10.23	2	2																			#DIV/0!	2	6.32955e+06
Q98SP7	Bardet-Biedl syndrome 2 protein homolog OS=Danio rerio OX=7955 GN=bbs2 PE=2 SV=1 - [BBS2_DANRE]	2	2	2	6.30961e+06	0		3.51129	2.38	2	2																			#DIV/0!	2	6.30961e+06
A0A8M1N377	solute carrier family 7, member 3 OS=Danio rerio OX=7955 GN=slc7a3 PE=3 SV=1 - [A0A8M1N377_DANRE]	2	2	2	8.80212e+06	0		4.63956	3.42	2	2					2	2	2	2.97709e+06	0		2.57332	3.57	2	2					#DIV/0!	2	5.88961e+06
A0A8M2BGU3	PH and SEC7 domain-containing protein 1-like OS=Danio rerio OX=7955 GN=LOC101886286 PE=4 SV=1 - [A0A8M2BGU3_DANRE]	1	1	1	2.12758e+06	0		0	2.69	1	1					2	3	3	8.43259e+06	0		3.30871	9.09	3	3					#DIV/0!	2	5.28008e+06
Q6R005	Disks large homolog 4 OS=Danio rerio OX=7955 GN=dlg4 PE=2 SV=1 - [DLG4_DANRE]	3	3	4	7.0663e+06	0		9.65286	4.12	3	4					1	1	1	3.46297e+06	0		0	1.5	1	1					#DIV/0!	2	5.26464e+06
A0A8M1QR29	protein FAM124A isoform X1 OS=Danio rerio OX=7955 GN=fam124a PE=3 SV=1 - [A0A8M1QR29_DANRE]															2	2	2	5.25189e+06	0		5.24512	4.29	2	2					#DIV/0!	2	5.25189e+06
A0A8M3B5H0	protocadherin-related 15a isoform X1 OS=Danio rerio OX=7955 GN=pcdh15a PE=4 SV=1 - [A0A8M3B5H0_DANRE]	2	2	2	5.24972e+06	0		1.77044	0.94	2	2																			#DIV/0!	2	5.24972e+06
A0A8M1NBW4	Bardet-Biedl syndrome 4 protein OS=Danio rerio OX=7955 GN=bbs4 PE=3 SV=1 - [A0A8M1NBW4_DANRE]	2	2	2	5.20844e+06	0		2.14539	3.41	2	2																			#DIV/0!	2	5.20844e+06
A0A8M9PFY2	epidermal growth factor receptor substrate 15-like 1 isoform X1 OS=Danio rerio OX=7955 GN=eps15l1a PE=4 SV=1 - [A0A8M9PFY2_DANRE]	2	2	2	3.27266e+06	0		1.9737	2.12	2	2																			#DIV/0!	2	3.27266e+06
A0A8M1RL76	catenin delta-2 isoform X1 OS=Danio rerio OX=7955 GN=ctnnd2a PE=3 SV=1 - [A0A8M1RL76_DANRE]	1	2	2	2.49531e+06	0		0	1.64	2	2																			#DIV/0!	2	2.49531e+06
A0A8N7TB01	plakophilin-4 isoform X1 OS=Danio rerio OX=7955 GN=pkp4 PE=3 SV=1 - [A0A8N7TB01_DANRE]	1	2	2	1.94993e+06	0		3.09917	2.11	2	2					2	2	2	1.88325e+06	0		4.17772	2.11	2	2					#DIV/0!	2	1.91659e+06
A0A8M3AKR9	zinc finger protein 646 isoform X1 OS=Danio rerio OX=7955 GN=si:dkey-89b17.4 PE=4 SV=1 - [A0A8M3AKR9_DANRE]															2	2	2	1.47908e+06	0		2.11936	1.17	2	2					#DIV/0!	2	1.47908e+06
A0A8M3ARX1	Chromatin-remodeling ATPase INO80 OS=Danio rerio OX=7955 GN=ino80 PE=3 SV=1 - [A0A8M3ARX1_DANRE]															2	2	2	1.3088e+06	0		0	1.54	2	2					#DIV/0!	2	1.3088e+06
A0A8M9Q812	HECT-type E3 ubiquitin transferase OS=Danio rerio OX=7955 GN=huwe1 PE=4 SV=1 - [A0A8M9Q812_DANRE]															2	2	2	566022	0		2.11124	0.5	2	2					#DIV/0!	2	566022
A0A8M3BDW6	Spectrin beta chain OS=Danio rerio OX=7955 GN=sptbn1 PE=3 SV=1 - [A0A8M3BDW6_DANRE]	2	2	2	1.65038e+08	0		1.89162	0.68	2	2					1	1	1	890921	0		1.78652	0.55	1	1					#DIV/0!	1.5	8.29642e+07
Q5BJJ8	39S ribosomal protein L51, mitochondrial OS=Danio rerio OX=7955 GN=mrpl51 PE=2 SV=1 - [RM51_DANRE]	1	1	1	8.26941e+06	0		0	4.84	1	1					2	2	2	2.59673e+07	0		1.88811	17.74	2	2					#DIV/0!	1.5	1.71183e+07
A0A8M6Z9M1	phosphatidylinositol binding clathrin assembly protein b isoform X1 OS=Danio rerio OX=7955 GN=picalmb PE=3 SV=1 - [A0A8M6Z9M1_DANRE]	2	2	2	9.95201e+06	0		3.84875	3.15	2	2					1	1	1	5.29308e+06	0		2.04835	1.64	1	1					#DIV/0!	1.5	7.62254e+06
A0A8M2BBL4	protein phosphatase 1 regulatory subunit 29-like OS=Danio rerio OX=7955 GN=LOC796777 PE=4 SV=1 - [A0A8M2BBL4_DANRE]	2	2	2	1.15155e+07	0		4.90607	2.81	2	2					1	1	1	3.41794e+06	0		2.40737	1.8	1	1					#DIV/0!	1.5	7.46673e+06
A0A8M3B8R1	clathrin coat assembly protein AP180 isoform X1 OS=Danio rerio OX=7955 GN=si:ch211-214j24.9 PE=3 SV=1 - [A0A8M3B8R1_DANRE]	2	2	2	8.89439e+06	0		4.38437	3.66	2	2					1	1	1	1.67767e+06	0		2.03749	2.39	1	1					#DIV/0!	1.5	5.28603e+06
Q9PUE4	Coatomer subunit gamma-2 OS=Danio rerio OX=7955 GN=copg2 PE=2 SV=2 - [COPG2_DANRE]	2	2	2	3.47559e+06	0		4.62271	3.32	2	2					1	1	1	2.83194e+06	0		1.8572	1.37	1	1					#DIV/0!	1.5	3.15377e+06
A0A8M3AL15	CAD protein OS=Danio rerio OX=7955 GN=cad PE=3 SV=1 - [A0A8M3AL15_DANRE]															2	3	3	1.6487e+07	1.47823e+06	11.1532	2.443	0.98	2	2	1.92388	0.44	1	1	11.1532	3	1.6487e+07
A0A8M9PH95	Unconventional myosin-VI OS=Danio rerio OX=7955 GN=myo6a PE=3 SV=1 - [A0A8M9PH95_DANRE]															2	7	8	1.73597e+07	3.91227e+06	4.43725	14.8563	5.12	6	6	4.92876	1.4	2	2	4.43725	7	1.73597e+07
Q8AYM7	Green-sensitive opsin-3 OS=Danio rerio OX=7955 GN=opn1mw3 PE=1 SV=1 - [OPSG3_DANRE]															2	4	6	1.82261e+07	4.233e+06	4.30573	6.58245	11.75	3	3	6.77036	13.18	3	3	4.30573	4	1.82261e+07
A0A8M1P5N6	keratin 4 OS=Danio rerio OX=7955 GN=krt4 PE=3 SV=1 - [A0A8M1P5N6_DANRE]	8	8	47	8.00141e+08	2.56833e+09	0.311542	24.1502	7.85	7	14	80.4025	9.05	8	33	6	6	30	1.58518e+09	2.02214e+08	7.83914	36.617	7.44	6	25	10.375	5.63	4	5	4.07534	6.5	1.19266e+09
A0A8M1N119	phoenix OS=Danio rerio OX=7955 GN=pho PE=4 SV=1 - [A0A8M1N119_DANRE]	4	4	4	6.81485e+06	1.14226e+06	5.96612	1.74897	0.86	2	2	3.95765	0.79	2	2	4	4	5	4.28773e+06	4.75417e+06	0.901888	0	0.29	1	1	6.8414	1.64	4	4	3.434	3	5.55129e+06
A0A8M1NAN4	vitellogenin 4 precursor OS=Danio rerio OX=7955 GN=vtg4 PE=4 SV=1 - [A0A8M1NAN4_DANRE]															3	3	4	2.146e+06	631594	3.39775	4.68495	2.58	3	3	1.92397	0.66	1	1	3.39775	3	2.146e+06
A0A8N1Z184	collagen alpha-1(II) chain precursor OS=Danio rerio OX=7955 GN=col2a1a PE=4 SV=1 - [A0A8N1Z184_DANRE]	2	2	3	1.59036e+07	3.5502e+06	4.47963	4.26305	1.41	2	2	2.55339	0.8	1	1	1	1	1	3.40466e+06	0		2.18101	0.8	1	1					4.47963	1.5	9.65412e+06
A0A8M9PRM2	DNA helicase OS=Danio rerio OX=7955 GN=chd4a PE=3 SV=1 - [A0A8M9PRM2_DANRE]															1	2	3	5.5768e+07	8.32649e+06	6.69765	3.76417	0.93	2	2	2.28026	0.62	1	1	6.69765	2	5.5768e+07
A0A8M1PCH6	Calreticulin OS=Danio rerio OX=7955 GN=calr3b PE=3 SV=1 - [A0A8M1PCH6_DANRE]															1	1	2	5.65353e+06	259969	21.747	1.95352	2.16	1	1	2.27005	2.16	1	1	21.747	1	5.65353e+06
A0A8M1RFW3	tripartite motif-containing protein 16 OS=Danio rerio OX=7955 GN=ftr61 PE=4 SV=1 - [A0A8M1RFW3_DANRE]	1	1	1	1498794628	0		0	1.1	1	1																			#DIV/0!	1	1498794628
Q66L51	2-methoxy-6-polyprenyl-1,4-benzoquinol methylase, mitochondrial OS=Danio rerio OX=7955 GN=coq5 PE=2 SV=1 - [COQ5_DANRE]	1	1	1	1.67295e+09	0		2.50811	4.89	1	1					1	1	1	91783259	0		2.66837	4.89	1	1					#DIV/0!	1	8.82365e+08
A0A8M9Q8Z8	vigilin OS=Danio rerio OX=7955 GN=hdlbpb PE=4 SV=1 - [A0A8M9Q8Z8_DANRE]	1	1	1	575141956	0		1.6493	0.71	1	1																			#DIV/0!	1	575141956
A0A8M2BL44	suppressor of cytokine signaling 9 OS=Danio rerio OX=7955 GN=socs9 PE=4 SV=1 - [A0A8M2BL44_DANRE]	1	1	1	5.3769e+08	0		0	1.81	1	1																			#DIV/0!	1	5.3769e+08
A0A8M3AQJ0	phosphoinositide 3-kinase regulatory subunit 6 OS=Danio rerio OX=7955 GN=pik3r6b PE=4 SV=1 - [A0A8M3AQJ0_DANRE]															1	1	1	497415796	0		0	0.96	1	1					#DIV/0!	1	497415796
A0A8M9P2G9	ankyrin repeat domain-containing protein 6 isoform X1 OS=Danio rerio OX=7955 GN=ankrd6b PE=4 SV=1 - [A0A8M9P2G9_DANRE]	1	1	1	4.7784e+08	0		0	1.2	1	1																			#DIV/0!	1	4.7784e+08
A0A8M3BCZ5	Glutamate receptor OS=Danio rerio OX=7955 GN=grik1a PE=3 SV=1 - [A0A8M3BCZ5_DANRE]	1	1	1	3.6956e+08	0		2.19562	0.87	1	1																			#DIV/0!	1	3.6956e+08
A0A8N7TDH1	Glutaminase OS=Danio rerio OX=7955 GN=glsb PE=3 SV=1 - [A0A8N7TDH1_DANRE]															1	1	1	338947313	0		0	2.52	1	1					#DIV/0!	1	338947313
A0A8M9PK40	cilia- and flagella-associated protein 251 isoform X1 OS=Danio rerio OX=7955 GN=wdr66 PE=4 SV=1 - [A0A8M9PK40_DANRE]															1	1	1	3.16149e+08	0		0	1.56	1	1					#DIV/0!	1	3.16149e+08
A0A8N7UVD6	symplekin isoform X1 OS=Danio rerio OX=7955 GN=sympk PE=4 SV=1 - [A0A8N7UVD6_DANRE]															1	1	1	289739585	0		1.90664	0.64	1	1					#DIV/0!	1	289739585
A0A8M3AQF7	protein FEV-like isoform X1 OS=Danio rerio OX=7955 GN=LOC100537796 PE=3 SV=1 - [A0A8M3AQF7_DANRE]	1	1	1	2.66138e+08	0		2.3166	3.35	1	1																			#DIV/0!	1	2.66138e+08
A0A8M1NIS1	FRAS1 related extracellular matrix 2b precursor OS=Danio rerio OX=7955 GN=frem2b PE=3 SV=1 - [A0A8M1NIS1_DANRE]															1	1	1	2.54583e+08	0		0	0.22	1	1					#DIV/0!	1	2.54583e+08
A0A8N7UUM6	histone-lysine N-methyltransferase, H3 lysine-36 and H4 lysine-20 specific OS=Danio rerio OX=7955 GN=nsd1a PE=4 SV=1 - [A0A8N7UUM6_DANRE]															1	1	1	249799708	0		1.62891	0.54	1	1					#DIV/0!	1	249799708
A0A8M6YT69	centrosomal protein of 170 kDa protein B isoform X1 OS=Danio rerio OX=7955 GN=cep170b PE=3 SV=1 - [A0A8M6YT69_DANRE]															1	1	1	2.32146e+08	0		0	0.73	1	1					#DIV/0!	1	2.32146e+08
A0A8M1RN71	neuronal tyrosine-phosphorylated phosphoinositide-3-kinase adapter 2-like isoform X1 OS=Danio rerio OX=7955 GN=nyap2b PE=4 SV=1 - [A0A8M1RN71_DANRE]	1	1	1	2.05276e+08	0		0	1.02	1	1																			#DIV/0!	1	2.05276e+08
Q1L8U8	Histone-lysine N-methyltransferase SETDB1-A OS=Danio rerio OX=7955 GN=setdb1a PE=3 SV=1 - [STB1A_DANRE]															1	1	1	1.66824e+08	0		1.72239	0.97	1	1					#DIV/0!	1	1.66824e+08
A0A8M1PSC9	F-box only protein 38 isoform X1 OS=Danio rerio OX=7955 GN=fbxo38 PE=4 SV=1 - [A0A8M1PSC9_DANRE]															1	1	1	1.38363e+08	0		1.89128	0.89	1	1					#DIV/0!	1	1.38363e+08
A0A8M2B1N3	histone-lysine N-methyltransferase NSD3 isoform X1 OS=Danio rerio OX=7955 GN=whsc1l1 PE=4 SV=1 - [A0A8M2B1N3_DANRE]															1	1	1	1.28486e+08	0		2.33116	0.83	1	1					#DIV/0!	1	1.28486e+08
F1R237	Tudor domain-containing 6 OS=Danio rerio OX=7955 GN=tdrd6 PE=1 SV=2 - [TDRD6_DANRE]	1	1	1	1.25091e+08	0		0	0.28	1	1																			#DIV/0!	1	1.25091e+08
A0A8M9PZ95	Anoctamin OS=Danio rerio OX=7955 GN=ano3 PE=3 SV=1 - [A0A8M9PZ95_DANRE]															1	1	1	1.15735e+08	0		0	0.78	1	1					#DIV/0!	1	1.15735e+08
A0A8N7USZ0	zinc finger protein 708-like OS=Danio rerio OX=7955 GN=si:dkey-30k6.5 PE=4 SV=1 - [A0A8N7USZ0_DANRE]	1	1	1	1.13585e+08	0		1.70881	0.79	1	1																			#DIV/0!	1	1.13585e+08
A0A8M1PHS9	oligoribonuclease, mitochondrial precursor OS=Danio rerio OX=7955 GN=smfn PE=3 SV=1 - [A0A8M1PHS9_DANRE]	1	1	1	76339475	0		2.53716	5.02	1	1																			#DIV/0!	1	76339475
A0A8M2B9P5	MAP7 domain-containing protein 2 isoform X1 OS=Danio rerio OX=7955 GN=map7d2b PE=3 SV=1 - [A0A8M2B9P5_DANRE]	1	1	1	7.31935e+07	0		2.05137	1.39	1	1																			#DIV/0!	1	7.31935e+07
A0A8M2B809	chloride intracellular channel protein 3 OS=Danio rerio OX=7955 GN=clic3 PE=3 SV=1 - [A0A8M2B809_DANRE]															1	1	1	7.00587e+07	0		2.69607	5.44	1	1					#DIV/0!	1	7.00587e+07
A0A8M2BDQ2	Serine/threonine-protein kinase 11-interacting protein OS=Danio rerio OX=7955 GN=stk11ip PE=3 SV=1 - [A0A8M2BDQ2_DANRE]															1	1	1	6.95382e+07	0		0	1.12	1	1					#DIV/0!	1	6.95382e+07
A0A8M1PHT4	Palmitoyl-protein hydrolase OS=Danio rerio OX=7955 GN=lypla2 PE=3 SV=1 - [A0A8M1PHT4_DANRE]	1	1	1	6.61798e+07	0		1.70939	4.74	1	1																			#DIV/0!	1	6.61798e+07
A0A8N1TXU9	glycerophosphodiester phosphodiesterase domain containing 1 like OS=Danio rerio OX=7955 GN=gdpd3a PE=3 SV=1 - [A0A8N1TXU9_DANRE]															1	1	1	6.54276e+07	0		2.32577	4.13	1	1					#DIV/0!	1	6.54276e+07
A0A8M9PN59	FERM domain-containing protein 4B isoform X1 OS=Danio rerio OX=7955 GN=frmd4ba PE=4 SV=1 - [A0A8M9PN59_DANRE]	1	1	1	6.30307e+07	0		2.09367	1.56	1	1																			#DIV/0!	1	6.30307e+07
Q6P6X9	Nucleoporin NUP35 OS=Danio rerio OX=7955 GN=nup35 PE=1 SV=1 - [NUP35_DANRE]	1	1	1	6.23421e+07	0		2.08878	3.57	1	1																			#DIV/0!	1	6.23421e+07
A0A8M9Q9J2	protein phosphatase 1A isoform X1 OS=Danio rerio OX=7955 GN=ppm1aa PE=3 SV=1 - [A0A8M9Q9J2_DANRE]	1	1	1	5.99907e+07	0		1.80595	3.32	1	1																			#DIV/0!	1	5.99907e+07
A0A8M9Q6X5	protocadherin beta-16-like OS=Danio rerio OX=7955 GN=LOC110440084 PE=4 SV=1 - [A0A8M9Q6X5_DANRE]															1	1	1	5.96897e+07	0		1.81073	2.04	1	1					#DIV/0!	1	5.96897e+07
A0A8M6YUK6	microtubule-actin cross-linking factor 1 isoform X1 OS=Danio rerio OX=7955 GN=macf1a PE=4 SV=1 - [A0A8M6YUK6_DANRE]															1	1	1	5.83772e+07	0		2.2458	0.13	1	1					#DIV/0!	1	5.83772e+07
A0A8M9Q1B2	uncharacterized protein LOC110439392 OS=Danio rerio OX=7955 GN=LOC110439392 PE=4 SV=1 - [A0A8M9Q1B2_DANRE]	1	1	1	57942675	0		0	1.46	1	1																			#DIV/0!	1	57942675
A0A8M2B5H2	phospholipase DDHD1 isoform X1 OS=Danio rerio OX=7955 GN=ddhd1a PE=4 SV=1 - [A0A8M2B5H2_DANRE]															1	1	1	5.67088e+07	0		0	0.97	1	1					#DIV/0!	1	5.67088e+07
A0A8M9P8P8	Ribonuclease H OS=Danio rerio OX=7955 GN=LOC110438013 PE=3 SV=1 - [A0A8M9P8P8_DANRE]	1	1	1	5.6188e+07	0		1.79879	5.86	1	1																			#DIV/0!	1	5.6188e+07
A0A8M1PSJ7	fibrous sheath CABYR-binding protein-like OS=Danio rerio OX=7955 GN=LOC100001665 PE=3 SV=1 - [A0A8M1PSJ7_DANRE]															1	1	1	5.52993e+07	0		1.86022	1.52	1	1					#DIV/0!	1	5.52993e+07
A0A8M3AQW8	Tyrosine-protein kinase OS=Danio rerio OX=7955 GN=tyk2 PE=3 SV=1 - [A0A8M3AQW8_DANRE]	1	1	1	5.4543e+07	0		1.8077	1.46	1	1																			#DIV/0!	1	5.4543e+07
A0A8M2B8S1	Hermansky-Pudlak syndrome 3 protein isoform X1 OS=Danio rerio OX=7955 GN=hps3 PE=4 SV=1 - [A0A8M2B8S1_DANRE]	1	1	1	4.99009e+07	0		3.33359	1.25	1	1																			#DIV/0!	1	4.99009e+07
A0A8M2B2I8	SH2 domain-containing protein 4A isoform X1 OS=Danio rerio OX=7955 GN=sh2d4a PE=4 SV=1 - [A0A8M2B2I8_DANRE]															1	1	1	4.64439e+07	0		3.14087	3.33	1	1					#DIV/0!	1	4.64439e+07
A0A8M1NZL3	uncharacterized protein LOC100151273 OS=Danio rerio OX=7955 GN=si:ch73-382f3.1 PE=3 SV=1 - [A0A8M1NZL3_DANRE]	1	1	1	4.1891e+07	0		0	3.53	1	1																			#DIV/0!	1	4.1891e+07
Q5BJB7	39S ribosomal protein L10, mitochondrial OS=Danio rerio OX=7955 GN=mrpl10 PE=2 SV=1 - [RM10_DANRE]															1	1	1	4.11837e+07	0		3.6048	5.95	1	1					#DIV/0!	1	4.11837e+07
A0A8M2BHQ8	tight junction protein ZO-3 OS=Danio rerio OX=7955 GN=tjp3 PE=3 SV=1 - [A0A8M2BHQ8_DANRE]															1	1	1	4.05498e+07	0		1.88548	0.56	1	1					#DIV/0!	1	4.05498e+07
A0A8M9QG93	anosmin-1-like OS=Danio rerio OX=7955 GN=LOC100535716 PE=4 SV=1 - [A0A8M9QG93_DANRE]	1	1	1	4.05245e+07	0		0	1.06	1	1																			#DIV/0!	1	4.05245e+07
A0A8M3AZS0	Carbonic anhydrase OS=Danio rerio OX=7955 GN=ca12 PE=3 SV=1 - [A0A8M3AZS0_DANRE]	1	1	1	3.8205e+07	0		0	1.19	1	1																			#DIV/0!	1	3.8205e+07
B2ZFP3	SWI/SNF-related matrix-associated actin-dependent regulator of chromatin subfamily A-like protein 1 OS=Danio rerio OX=7955 GN=smarcal1 PE=2 SV=1 - [SMAL1_DANRE]															1	1	1	3.67332e+07	0		0	0.87	1	1					#DIV/0!	1	3.67332e+07
A0A8M9P5C7	SRSF protein kinase 3-like isoform X1 OS=Danio rerio OX=7955 GN=si:ch211-220i18.4 PE=3 SV=1 - [A0A8M9P5C7_DANRE]															1	1	1	3.5855e+07	0		2.32982	3.79	1	1					#DIV/0!	1	3.5855e+07
A0A8M1NFK9	ligand of Numb protein X 2 OS=Danio rerio OX=7955 GN=lnx2a PE=4 SV=1 - [A0A8M1NFK9_DANRE]															1	1	1	3.3586e+07	0		0	0.81	1	1					#DIV/0!	1	3.3586e+07
A0A8M1NG70	DNA repair protein REV1 OS=Danio rerio OX=7955 GN=rev1 PE=3 SV=1 - [A0A8M1NG70_DANRE]															1	1	1	3.34655e+07	0		0	0.55	1	1					#DIV/0!	1	3.34655e+07
A0A8M3B3V5	ATP-binding cassette sub-family A member 1 isoform X1 OS=Danio rerio OX=7955 GN=zgc:172302 PE=4 SV=1 - [A0A8M3B3V5_DANRE]	1	1	1	3.10125e+07	0		0	0.3	1	1																			#DIV/0!	1	3.10125e+07
A0A8N7T6K7	ras-related protein Rab-3B OS=Danio rerio OX=7955 GN=rab3b PE=4 SV=1 - [A0A8N7T6K7_DANRE]	1	1	1	3.03612e+07	0		1.96006	5.07	1	1																			#DIV/0!	1	3.03612e+07
A0A8M6Z7R4	serine/threonine-protein kinase Nek5 OS=Danio rerio OX=7955 GN=si:ch211-285c6.3 PE=3 SV=1 - [A0A8M6Z7R4_DANRE]	1	1	1	2.88021e+07	0		1.64396	1.66	1	1																			#DIV/0!	1	2.88021e+07
A0A8M9PSS1	protein NLRC3-like OS=Danio rerio OX=7955 GN=LOC110437715 PE=4 SV=1 - [A0A8M9PSS1_DANRE]	1	1	1	2.53739e+07	0		1.67314	1.03	1	1																			#DIV/0!	1	2.53739e+07
A1L2G3	Ubiquitin carboxyl-terminal hydrolase BAP1 OS=Danio rerio OX=7955 GN=bap1 PE=2 SV=2 - [BAP1_DANRE]															1	1	1	2.52433e+07	0		0	0.93	1	1					#DIV/0!	1	2.52433e+07
Q7ZW33	U3 small nucleolar RNA-associated protein 15 homolog OS=Danio rerio OX=7955 GN=utp15 PE=2 SV=1 - [UTP15_DANRE]															1	1	1	2.42353e+07	0		2.42752	1.74	1	1					#DIV/0!	1	2.42353e+07
A0A8N7TE24	TNFAIP3-interacting protein 2 OS=Danio rerio OX=7955 GN=tnip2 PE=4 SV=1 - [A0A8N7TE24_DANRE]	1	1	1	4.43894e+07	0		2.13719	2.01	1	1					1	1	1	0	0						1.99251	2.01	1	1	#DIV/0!	1	2.21947e+07
A0A8M2BBT4	uncharacterized protein LOC565020 isoform X1 OS=Danio rerio OX=7955 GN=ppfibp1a PE=3 SV=1 - [A0A8M2BBT4_DANRE]	1	1	1	21782140	0		3.29647	1.82	1	1																			#DIV/0!	1	21782140
A0A8M1QL44	desmoplakin isoform X1 OS=Danio rerio OX=7955 GN=dspa PE=4 SV=1 - [A0A8M1QL44_DANRE]	1	1	1	2.07394e+07	0		2.36041	0.56	1	1																			#DIV/0!	1	2.07394e+07
A0A8M1N787	Tetraspanin OS=Danio rerio OX=7955 GN=tspan3a PE=3 SV=1 - [A0A8M1N787_DANRE]	1	1	1	1.95513e+07	0		1.68312	4.35	1	1																			#DIV/0!	1	1.95513e+07
F1Q8W0	Cactin OS=Danio rerio OX=7955 GN=cactin PE=2 SV=1 - [CATIN_DANRE]	1	1	1	1.85107e+07	0		2.08532	1.08	1	1																			#DIV/0!	1	1.85107e+07
A0A8M9Q9V9	serine/threonine-protein kinase pim-2-like OS=Danio rerio OX=7955 GN=LOC108191006 PE=3 SV=1 - [A0A8M9Q9V9_DANRE]															1	1	1	18019616	0		1.84057	2.59	1	1					#DIV/0!	1	18019616
A0A8M3B874	WD repeat-containing protein 27 OS=Danio rerio OX=7955 GN=wdr27 PE=4 SV=1 - [A0A8M3B874_DANRE]															1	1	1	1.6862e+07	0		1.95385	0.98	1	1					#DIV/0!	1	1.6862e+07
A0A8M1QQN3	dedicator of cytokinesis protein 8 isoform X1 OS=Danio rerio OX=7955 GN=dock8 PE=3 SV=1 - [A0A8M1QQN3_DANRE]															1	1	1	1.61959e+07	0		2.45325	0.81	1	1					#DIV/0!	1	1.61959e+07
A0A8M6Z698	putative methyltransferase NSUN7 OS=Danio rerio OX=7955 GN=LOC101882573 PE=3 SV=1 - [A0A8M6Z698_DANRE]	1	1	1	1.53774e+07	0		1.77908	1.2	1	1																			#DIV/0!	1	1.53774e+07
A0A8M1N060	Non-specific serine/threonine protein kinase OS=Danio rerio OX=7955 GN=pak4 PE=4 SV=1 - [A0A8M1N060_DANRE]															1	1	1	1.48049e+07	0		0	1.05	1	1					#DIV/0!	1	1.48049e+07
A0A8M3AY56	Glutamate receptor OS=Danio rerio OX=7955 GN=grid1b PE=3 SV=1 - [A0A8M3AY56_DANRE]	1	1	1	1.47735e+07	0		0	0.57	1	1																			#DIV/0!	1	1.47735e+07
A0A8M9P3E4	unconventional myosin-Vb isoform X2 OS=Danio rerio OX=7955 GN=myo5b PE=3 SV=1 - [A0A8M9P3E4_DANRE]															1	1	1	1.31367e+07	0		0	0.54	1	1					#DIV/0!	1	1.31367e+07
Q5RHI5	Denticleless protein homolog OS=Danio rerio OX=7955 GN=dtl PE=2 SV=1 - [DTL_DANRE]	1	1	1	11421221	0		2.86999	1.85	1	1																			#DIV/0!	1	11421221
A0A8N7TEV8	cysteine/serine-rich nuclear protein 1 OS=Danio rerio OX=7955 GN=csrnp1a PE=3 SV=1 - [A0A8N7TEV8_DANRE]															1	1	1	1.12033e+07	0		0	2.14	1	1					#DIV/0!	1	1.12033e+07
A0A8N7T7T2	Phospholipid-transporting ATPase OS=Danio rerio OX=7955 GN=atp8b5b PE=3 SV=1 - [A0A8N7T7T2_DANRE]															1	1	1	1.04814e+07	0		0	0.76	1	1					#DIV/0!	1	1.04814e+07
A0A8M1PGB4	40S ribosomal protein S14 OS=Danio rerio OX=7955 GN=rps14 PE=3 SV=1 - [A0A8M1PGB4_DANRE]															1	1	1	1.01759e+07	0		2.41984	7.28	1	1					#DIV/0!	1	1.01759e+07
A0A8M1NT70	proteasome-associated protein ECM29 homolog OS=Danio rerio OX=7955 GN=kiaa0368 PE=4 SV=1 - [A0A8M1NT70_DANRE]	1	1	1	9.70499e+06	0		2.30704	0.43	1	1																			#DIV/0!	1	9.70499e+06
A0A8M1RNL2	Anion exchange protein OS=Danio rerio OX=7955 GN=slc4a10b PE=3 SV=1 - [A0A8M1RNL2_DANRE]															1	1	1	9.52255e+06	0		3.53285	1.56	1	1					#DIV/0!	1	9.52255e+06
A0A8M1Q6T7	protein-glutamine gamma-glutamyltransferase K-like OS=Danio rerio OX=7955 GN=tgm1l3 PE=3 SV=1 - [A0A8M1Q6T7_DANRE]															1	1	1	9.44986e+06	0		1.87928	0.83	1	1					#DIV/0!	1	9.44986e+06
A0A8M9Q0M9	uncharacterized protein LOC100330916 isoform X2 OS=Danio rerio OX=7955 GN=LOC100330916 PE=3 SV=1 - [A0A8M9Q0M9_DANRE]	1	1	1	9.32727e+06	0		2.23795	0.12	1	1																			#DIV/0!	1	9.32727e+06
A0A8M2BKM4	SH3 domain and tetratricopeptide repeat-containing protein 2 isoform X1 OS=Danio rerio OX=7955 GN=sh3tc2 PE=4 SV=1 - [A0A8M2BKM4_DANRE]	1	1	1	9.25616e+06	0		0	0.69	1	1																			#DIV/0!	1	9.25616e+06
A0A8M9PYW2	Dynein regulatory complex subunit 7 OS=Danio rerio OX=7955 GN=ccdc135 PE=3 SV=1 - [A0A8M9PYW2_DANRE]															1	1	1	8.98288e+06	0		3.16762	1.9	1	1					#DIV/0!	1	8.98288e+06
A0A8M6Z6L2	gastrula zinc finger protein XlCGF57.1-like OS=Danio rerio OX=7955 GN=LOC110437786 PE=4 SV=1 - [A0A8M6Z6L2_DANRE]	1	1	1	8.67248e+06	0		3.17687	2.94	1	1																			#DIV/0!	1	8.67248e+06
F1QRC1	Dynein regulatory complex protein 1 OS=Danio rerio OX=7955 GN=drc1 PE=2 SV=1 - [DRC1_DANRE]	1	1	1	8.0278e+06	0		0	2.24	1	1																			#DIV/0!	1	8.0278e+06
A0A8M9PB08	LOW QUALITY PROTEIN: supervillin OS=Danio rerio OX=7955 GN=svilb PE=3 SV=1 - [A0A8M9PB08_DANRE]															1	1	1	7901889	0		2.04607	0.49	1	1					#DIV/0!	1	7901889
A0A8M2B5R2	uncharacterized protein si:dkey-242h9.3 isoform X1 OS=Danio rerio OX=7955 GN=si:dkey-242h9.3 PE=4 SV=1 - [A0A8M2B5R2_DANRE]															1	1	1	7.74197e+06	0		1.71851	1.8	1	1					#DIV/0!	1	7.74197e+06
A0JMG1	Speckle-type POZ protein-like B OS=Danio rerio OX=7955 GN=spoplb PE=2 SV=2 - [SPOLB_DANRE]															1	1	1	7.60959e+06	0		0	2.3	1	1					#DIV/0!	1	7.60959e+06
A0A8M9Q131	cadherin-related family member 5-like isoform X1 OS=Danio rerio OX=7955 GN=cdhr5-rs PE=4 SV=1 - [A0A8M9Q131_DANRE]	1	1	1	7.31111e+06	0		1.7196	0.92	1	1																			#DIV/0!	1	7.31111e+06
A0A8N7T793	ATP-binding cassette sub-family A member 12 OS=Danio rerio OX=7955 GN=abca12 PE=4 SV=1 - [A0A8N7T793_DANRE]	1	1	1	7.1575e+06	0		0	0.12	1	1																			#DIV/0!	1	7.1575e+06
A0A8M2B9K2	rap guanine nucleotide exchange factor 3 isoform X1 OS=Danio rerio OX=7955 GN=rapgef3 PE=4 SV=1 - [A0A8M2B9K2_DANRE]															1	1	1	7.15621e+06	0		1.99147	1.13	1	1					#DIV/0!	1	7.15621e+06
A0A8M9PM53	sickle tail protein homolog isoform X1 OS=Danio rerio OX=7955 GN=si:ch211-285f17.1 PE=4 SV=1 - [A0A8M9PM53_DANRE]															1	1	1	7.00704e+06	0		0	0.39	1	1					#DIV/0!	1	7.00704e+06
A0A8M3BBK8	histone deacetylase 6 OS=Danio rerio OX=7955 GN=hdac6 PE=4 SV=1 - [A0A8M3BBK8_DANRE]															1	1	2	6.89636e+06	0		1.77538	0.65	1	1	1.75931	0.65	1	1	#DIV/0!	1	6.89636e+06
A0A8M9Q0R7	apolipoprotein F OS=Danio rerio OX=7955 GN=apof PE=4 SV=1 - [A0A8M9Q0R7_DANRE]															1	1	1	6.7429e+06	0		2.37927	3.06	1	1					#DIV/0!	1	6.7429e+06
A0A8M1PGK6	Fructose-bisphosphate aldolase OS=Danio rerio OX=7955 GN=aldoab PE=3 SV=1 - [A0A8M1PGK6_DANRE]															1	1	1	6.078e+06	0		0	1.92	1	1					#DIV/0!	1	6.078e+06
A0A8M2BEI2	synaptophysin OS=Danio rerio OX=7955 GN=sypa PE=3 SV=1 - [A0A8M2BEI2_DANRE]															1	1	1	6.06944e+06	0		2.24625	3.4	1	1					#DIV/0!	1	6.06944e+06
A0A8M6Z2B4	Creatine kinase OS=Danio rerio OX=7955 GN=ckba PE=3 SV=1 - [A0A8M6Z2B4_DANRE]															1	1	1	5.6657e+06	0		3.3479	5.45	1	1					#DIV/0!	1	5.6657e+06
A0A8M2BK69	Inhibin beta B chain OS=Danio rerio OX=7955 GN=LOC101887111 PE=3 SV=1 - [A0A8M2BK69_DANRE]	1	1	1	5.49526e+06	0		1.73667	2.34	1	1																			#DIV/0!	1	5.49526e+06
A0A8M9Q0Y7	Gap junction protein OS=Danio rerio OX=7955 GN=LOC564307 PE=3 SV=1 - [A0A8M9Q0Y7_DANRE]	1	1	1	5.16721e+06	0		2.66008	4.4	1	1																			#DIV/0!	1	5.16721e+06
A0A8M1N7L1	Synaptophysin OS=Danio rerio OX=7955 GN=sypb PE=3 SV=1 - [A0A8M1N7L1_DANRE]															1	1	1	5.13482e+06	0		0	2.69	1	1					#DIV/0!	1	5.13482e+06
A0A8M9QBN0	collagen alpha-5(IV) chain isoform X1 OS=Danio rerio OX=7955 GN=col4a5 PE=4 SV=1 - [A0A8M9QBN0_DANRE]	1	1	1	5.09351e+06	0		2.74635	0.83	1	1																			#DIV/0!	1	5.09351e+06
A0A8M9PU00	transforming acidic coiled-coil-containing protein 1 isoform X1 OS=Danio rerio OX=7955 GN=tacc1 PE=3 SV=1 - [A0A8M9PU00_DANRE]	1	1	1	5.03306e+06	0		0	1.04	1	1																			#DIV/0!	1	5.03306e+06
A0A8M9PZ32	uncharacterized protein LOC110438779 OS=Danio rerio OX=7955 GN=LOC110438779 PE=4 SV=1 - [A0A8M9PZ32_DANRE]															1	1	1	4.53783e+06	0		1.7941	2.25	1	1					#DIV/0!	1	4.53783e+06
A0A8M9PHJ3	eosinophil peroxidase OS=Danio rerio OX=7955 GN=epx PE=4 SV=1 - [A0A8M9PHJ3_DANRE]															1	1	1	4.51669e+06	0		0	1.81	1	1					#DIV/0!	1	4.51669e+06
A0A8M1P8I7	uncharacterized protein LOC100007808 OS=Danio rerio OX=7955 GN=cdc42ep1b PE=3 SV=1 - [A0A8M1P8I7_DANRE]	1	1	1	4.48262e+06	0		1.93846	2.94	1	1																			#DIV/0!	1	4.48262e+06
A0A8N7UZ62	uncharacterized protein LOC100170784 OS=Danio rerio OX=7955 GN=cyp2k8 PE=3 SV=1 - [A0A8N7UZ62_DANRE]	1	1	1	4.24137e+06	0		0	1.18	1	1																			#DIV/0!	1	4.24137e+06
A0A8M2BAK7	AFG3-like protein 1 OS=Danio rerio OX=7955 GN=si:ch1073-174d20.2 PE=3 SV=1 - [A0A8M2BAK7_DANRE]	1	1	1	4.08517e+06	0		0	1.6	1	1																			#DIV/0!	1	4.08517e+06
A0A8M1RLP4	E3 ubiquitin/ISG15 ligase TRIM25 OS=Danio rerio OX=7955 GN=ftr02 PE=4 SV=1 - [A0A8M1RLP4_DANRE]	1	1	1	4.05365e+06	0		1.65414	1.65	1	1																			#DIV/0!	1	4.05365e+06
Q6DEH3	Calcium/calmodulin-dependent protein kinase type II delta 1 chain OS=Danio rerio OX=7955 GN=camk2d1 PE=2 SV=2 - [KC2D1_DANRE]															1	1	1	3.48569e+06	0		1.72677	1.83	1	1					#DIV/0!	1	3.48569e+06
A0A8M2B599	Serine/threonine-protein kinase OS=Danio rerio OX=7955 GN=prkd1 PE=3 SV=1 - [A0A8M2B599_DANRE]	1	1	1	3.02312e+06	0		2.36669	1.92	1	1					1	1	1	3.69411e+06	0		2.86226	1.58	1	1					#DIV/0!	1	3.35862e+06
A0A8M1P913	ras/Rap GTPase-activating protein SynGAP1b OS=Danio rerio OX=7955 GN=syngap1b PE=4 SV=1 - [A0A8M1P913_DANRE]	1	1	1	3316872	0		1.97623	1.13	1	1																			#DIV/0!	1	3316872
A0A8M3B8A2	collagen alpha-6(VI) chain OS=Danio rerio OX=7955 GN=LOC100535278 PE=4 SV=1 - [A0A8M3B8A2_DANRE]	1	1	1	3.17845e+06	0		0	0.22	1	1																			#DIV/0!	1	3.17845e+06
A0A8M1PHD3	nucleolar protein of 40 kDa OS=Danio rerio OX=7955 GN=zcchc17 PE=4 SV=1 - [A0A8M1PHD3_DANRE]															1	1	1	3.15508e+06	0		1.99464	5.96	1	1					#DIV/0!	1	3.15508e+06
F1RAX4	Receptor for retinol uptake stra6 OS=Danio rerio OX=7955 GN=stra6 PE=1 SV=1 - [STRA6_DANRE]															1	1	1	3.1182e+06	0		2.68152	1.64	1	1					#DIV/0!	1	3.1182e+06
A0A8M1N4B9	dipeptidyl peptidase 2 precursor OS=Danio rerio OX=7955 GN=dpp7 PE=3 SV=1 - [A0A8M1N4B9_DANRE]															1	1	1	3.08321e+06	0		1.98928	2	1	1					#DIV/0!	1	3.08321e+06
A0A8M1PB19	endonuclease 8-like 1 OS=Danio rerio OX=7955 GN=neil1 PE=4 SV=1 - [A0A8M1PB19_DANRE]															1	1	1	2.70141e+06	0		1.84798	2.51	1	1					#DIV/0!	1	2.70141e+06
A0A8M2BAM8	potassium voltage-gated channel subfamily B member 2 OS=Danio rerio OX=7955 GN=kcnb2 PE=4 SV=1 - [A0A8M2BAM8_DANRE]															1	1	1	2.68072e+06	0		2.32814	1.7	1	1					#DIV/0!	1	2.68072e+06
A0A8M1PA27	RNA helicase OS=Danio rerio OX=7955 GN=ddx43 PE=3 SV=1 - [A0A8M1PA27_DANRE]	1	1	1	2.64274e+06	0		2.4821	1.53	1	1																			#DIV/0!	1	2.64274e+06
A0A8N7T863	Enhancer of polycomb homolog OS=Danio rerio OX=7955 GN=epc1a PE=3 SV=1 - [A0A8N7T863_DANRE]															1	1	1	2.55374e+06	0		2.18618	2.01	1	1					#DIV/0!	1	2.55374e+06
A0A8M2BBN8	protein ELFN1 OS=Danio rerio OX=7955 GN=elfn1a PE=4 SV=1 - [A0A8M2BBN8_DANRE]	1	1	1	2.53312e+06	0		3.32252	1.38	1	1																			#DIV/0!	1	2.53312e+06
A0A8M9P3G8	Arachidonate--CoA ligase OS=Danio rerio OX=7955 GN=acsl6 PE=4 SV=1 - [A0A8M9P3G8_DANRE]															1	1	1	2.48014e+06	0		0	1.78	1	1					#DIV/0!	1	2.48014e+06
A0A8M9QIB7	B-cell receptor CD22-like OS=Danio rerio OX=7955 GN=LOC100149932 PE=4 SV=1 - [A0A8M9QIB7_DANRE]	1	1	1	2.3562e+06	0		2.00532	2.82	1	1																			#DIV/0!	1	2.3562e+06
A0A8N7TF98	Gap junction protein OS=Danio rerio OX=7955 GN=LOC565638 PE=3 SV=1 - [A0A8N7TF98_DANRE]	1	1	1	2332097	0		2.11872	2.82	1	1																			#DIV/0!	1	2332097
A0A8M1RDD4	myosin-9-like OS=Danio rerio OX=7955 GN=LOC100331639 PE=4 SV=1 - [A0A8M1RDD4_DANRE]															1	1	1	2.16357e+06	0		2.42753	8.21	1	1					#DIV/0!	1	2.16357e+06
A0A8M2B5E4	ribosomal protein S6 kinase-like 1 isoform X1 OS=Danio rerio OX=7955 GN=rps6kl1 PE=4 SV=1 - [A0A8M2B5E4_DANRE]	1	1	1	1.88654e+06	0		1.74291	1.01	1	1																			#DIV/0!	1	1.88654e+06
A0A8M6YYK8	transcription termination factor 1 isoform X1 OS=Danio rerio OX=7955 GN=si:ch73-376l24.6 PE=4 SV=1 - [A0A8M6YYK8_DANRE]															1	1	1	1.85028e+06	0		1.74842	1.36	1	1					#DIV/0!	1	1.85028e+06
Q6IQC7	Thioredoxin-related transmembrane protein 2-B OS=Danio rerio OX=7955 GN=tmx2b PE=2 SV=1 - [TMX2B_DANRE]	1	1	1	1.72753e+06	0		2.67855	4.89	1	1																			#DIV/0!	1	1.72753e+06
A0A8M3BC60	Peptidylprolyl isomerase OS=Danio rerio OX=7955 GN=si:ch73-199g24.2 PE=4 SV=1 - [A0A8M3BC60_DANRE]															1	1	1	1.71197e+06	0		0	1.17	1	1					#DIV/0!	1	1.71197e+06
A7Y7X5	Zinc finger protein 711 OS=Danio rerio OX=7955 GN=znf711 PE=1 SV=1 - [ZN711_DANRE]															1	1	1	1.66394e+06	0		0	1.18	1	1					#DIV/0!	1	1.66394e+06
A0A8M9QI71	Receptor protein-tyrosine kinase OS=Danio rerio OX=7955 GN=mst1rb PE=4 SV=1 - [A0A8M9QI71_DANRE]															1	1	1	1.6353e+06	0		2.39755	1.09	1	1					#DIV/0!	1	1.6353e+06
A0A8M2B525	zinc finger protein Xfin OS=Danio rerio OX=7955 GN=im:7147486 PE=4 SV=1 - [A0A8M2B525_DANRE]															1	1	2	1.60302e+06	0		4.59182	0.87	1	2					#DIV/0!	1	1.60302e+06
A0A0R4IYX6	Zinc finger protein 687a OS=Danio rerio OX=7955 GN=znf687a PE=2 SV=1 - [Z687A_DANRE]	1	1	1	1.54009e+06	0		2.82994	1.28	1	1																			#DIV/0!	1	1.54009e+06
A0A8M2BLV2	uncharacterized protein LOC101885266 isoform X1 OS=Danio rerio OX=7955 GN=LOC101885266 PE=4 SV=1 - [A0A8M2BLV2_DANRE]															1	1	1	1.52474e+06	0		1.70291	1.49	1	1					#DIV/0!	1	1.52474e+06
C5J7W8	Serine/threonine-protein kinase SMG1 OS=Danio rerio OX=7955 GN=smg1 PE=2 SV=1 - [SMG1_DANRE]	1	1	1	2.91587e+06	0		0	0.19	1	1					1	1	1	0	0		0	0.47	1	1					#DIV/0!	1	1.45794e+06
A0A8M3AXU2	signal-induced proliferation-associated 1-like protein 2 isoform X1 OS=Danio rerio OX=7955 GN=sipa1l2 PE=4 SV=1 - [A0A8M3AXU2_DANRE]	1	1	1	1.39313e+06	0		2.39774	0.89	1	1																			#DIV/0!	1	1.39313e+06
A0A8M9QL68	protocadherin Fat 4 OS=Danio rerio OX=7955 GN=fat4 PE=4 SV=1 - [A0A8M9QL68_DANRE]	1	1	1	1.36542e+06	0		2.52502	0.28	1	1																			#DIV/0!	1	1.36542e+06
A0A8M2BJS4	Oxysterol-binding protein OS=Danio rerio OX=7955 GN=osbpl6 PE=3 SV=1 - [A0A8M2BJS4_DANRE]	1	1	1	1.27292e+06	0		0	1.08	1	1																			#DIV/0!	1	1.27292e+06
A0A8M1REA6	whirlin isoform X1 OS=Danio rerio OX=7955 GN=dfnb31a PE=4 SV=1 - [A0A8M1REA6_DANRE]															1	1	1	1.26839e+06	0		2.13728	1.7	1	1					#DIV/0!	1	1.26839e+06
A0A8N7UYB5	DNA topoisomerase 2 OS=Danio rerio OX=7955 GN=top2b PE=3 SV=1 - [A0A8N7UYB5_DANRE]															1	1	1	1.05481e+06	0		0	0.68	1	1					#DIV/0!	1	1.05481e+06
A0A8M9PGJ4	obscurin OS=Danio rerio OX=7955 GN=obscnb PE=3 SV=1 - [A0A8M9PGJ4_DANRE]	1	1	1	1.01364e+06	0		2.91435	0.22	1	1																			#DIV/0!	1	1.01364e+06
A0A8M1P0Q5	signal-induced proliferation-associated 1-like protein 1 OS=Danio rerio OX=7955 GN=sipa1l1 PE=4 SV=1 - [A0A8M1P0Q5_DANRE]	1	1	1	985736	0		1.79837	0.61	1	1																			#DIV/0!	1	985736
A0A8M9P4H5	5-hydroxytryptamine receptor 3A-like OS=Danio rerio OX=7955 GN=LOC103909641 PE=4 SV=1 - [A0A8M9P4H5_DANRE]	1	1	2	873466	0		1.81194	5.88	1	2																			#DIV/0!	1	873466
A0A8M9PQF2	spectrin alpha chain, non-erythrocytic 1 isoform X2 OS=Danio rerio OX=7955 GN=spna2 PE=3 SV=1 - [A0A8M9PQF2_DANRE]	1	1	1	853328	0		2.82115	0.4	1	1																			#DIV/0!	1	853328
A0A8M2BL73	trichohyalin-like isoform X1 OS=Danio rerio OX=7955 GN=LOC101884756 PE=4 SV=1 - [A0A8M2BL73_DANRE]															1	1	1	754207	0		0	0.73	1	1					#DIV/0!	1	754207
A0A8M9PMV4	Septin OS=Danio rerio OX=7955 GN=sept15 PE=3 SV=1 - [A0A8M9PMV4_DANRE]															1	1	1	749475	0		2.75827	3.21	1	1					#DIV/0!	1	749475
A0A8M1PF90	mitotic spindle assembly checkpoint protein MAD1 OS=Danio rerio OX=7955 GN=mad1l1 PE=3 SV=1 - [A0A8M1PF90_DANRE]															1	1	1	748204	0		1.74981	1.81	1	1					#DIV/0!	1	748204
A0A8M3AYT6	HEAT repeat-containing protein 5B OS=Danio rerio OX=7955 GN=heatr5b PE=3 SV=1 - [A0A8M3AYT6_DANRE]															1	1	1	738791	0		2.45629	0.54	1	1					#DIV/0!	1	738791
A0A8M9Q884	next to BRCA1 gene 1 protein isoform X1 OS=Danio rerio OX=7955 GN=nbr1a PE=4 SV=1 - [A0A8M9Q884_DANRE]															1	1	1	573950	0		1.60667	0.88	1	1					#DIV/0!	1	573950
A0A8M1NJ99	RNA helicase OS=Danio rerio OX=7955 GN=ddx3xa PE=3 SV=1 - [A0A8M1NJ99_DANRE]															1	1	1	551676	0		1.93616	1.41	1	1					#DIV/0!	1	551676
A0A8M1PF58	Gap junction protein OS=Danio rerio OX=7955 GN=cx52.9 PE=3 SV=1 - [A0A8M1PF58_DANRE]	1	1	1	544456	0		0	2.31	1	1																			#DIV/0!	1	544456
A0A8M3AS01	beta-adducin isoform X1 OS=Danio rerio OX=7955 GN=add2 PE=3 SV=1 - [A0A8M3AS01_DANRE]															1	1	1	530316	0		1.7618	1.49	1	1					#DIV/0!	1	530316
A0A8M2BEJ3	sodium-coupled neutral amino acid transporter 3 OS=Danio rerio OX=7955 GN=slc38a5a PE=4 SV=1 - [A0A8M2BEJ3_DANRE]	1	1	1	493198	0		1.73963	3.26	1	1																			#DIV/0!	1	493198
A0A8M9Q5G7	uncharacterized protein proca1 OS=Danio rerio OX=7955 GN=proca1 PE=4 SV=1 - [A0A8M9Q5G7_DANRE]															1	1	1	436204	0		1.63069	1.37	1	1					#DIV/0!	1	436204
Q66HV4	Coatomer subunit beta OS=Danio rerio OX=7955 GN=copb1 PE=2 SV=1 - [COPB_DANRE]															1	1	1	414845	0		1.77502	1.05	1	1					#DIV/0!	1	414845
A0A8M2B4L7	uncharacterized protein LOC101883115 OS=Danio rerio OX=7955 GN=LOC101883115 PE=4 SV=1 - [A0A8M2B4L7_DANRE]	1	1	1	410258	0		0	2.59	1	1																			#DIV/0!	1	410258
A0A8M1RNS0	adhesion G protein-coupled receptor B3 isoform X1 OS=Danio rerio OX=7955 GN=adgrb3 PE=4 SV=1 - [A0A8M1RNS0_DANRE]															1	1	1	341071	0		2.5276	0.92	1	1					#DIV/0!	1	341071
A0A8M6Z229	thrombospondin type-1 domain-containing protein 7A isoform X1 OS=Danio rerio OX=7955 GN=LOC101883726 PE=4 SV=1 - [A0A8M6Z229_DANRE]	1	1	1	149860	0		1.91659	0.77	1	1																			#DIV/0!	1	149860
A0A8M2BCY2	SET-binding protein OS=Danio rerio OX=7955 GN=setbp1 PE=4 SV=1 - [A0A8M2BCY2_DANRE]															1	1	1	115024	0		2.78479	1.04	1	1					#DIV/0!	1	115024
A0A8M3B7L2	BAH and coiled-coil domain-containing protein 1 isoform X1 OS=Danio rerio OX=7955 GN=bahcc1b PE=4 SV=1 - [A0A8M3B7L2_DANRE]															1	1	1	106594	0		2.42877	0.37	1	1					#DIV/0!	1	106594
A0A8M9PBH8	sterile alpha motif domain-containing protein 9-like OS=Danio rerio OX=7955 GN=LOC101882642 PE=4 SV=1 - [A0A8M9PBH8_DANRE]	1	1	1	55079.3	0		0	0.54	1	1																			#DIV/0!	1	55079.3
Q90YJ2	Neuroglobin OS=Danio rerio OX=7955 GN=ngb PE=1 SV=1 - [NGB_DANRE]															1	1	1	22678.4	0		0	6.29	1	1					#DIV/0!	1	22678.4
A0A8N7TAJ3	carbamoyl-phosphate synthase [ammonia], mitochondrial isoform X1 OS=Danio rerio OX=7955 GN=cps1 PE=3 SV=1 - [A0A8N7TAJ3_DANRE]	1	1	2	4.27188e+06	1.51686e+06	2.81626	3.03952	0.93	1	1	2.50192	0.93	1	1															2.81626	1	4.27188e+06
A0A8N7UR79	heterogeneous nuclear ribonucleoprotein U isoform X1 OS=Danio rerio OX=7955 GN=hnrnpua PE=4 SV=1 - [A0A8N7UR79_DANRE]															1	2	3	3.62624e+06	1.48775e+06	2.43739	4.34718	3.03	2	2	1.88372	1.84	1	1	2.43739	2	3.62624e+06
A0A8M1N8W9	uncharacterized protein LOC678611 OS=Danio rerio OX=7955 GN=krt93 PE=3 SV=1 - [A0A8M1N8W9_DANRE]	6	6	15	9.78515e+08	3153270819	0.310318	8.37231	7.79	5	6	17.3211	7.79	6	9	5	5	15	2.1165e+09	4.95903e+08	4.26798	9.54734	7.79	5	8	7.41093	5.41	3	7	2.28915	5	1.54751e+09
A0A8M1NDA0	uncharacterized protein LOC100037379 OS=Danio rerio OX=7955 GN=zgc:163061 PE=3 SV=1 - [A0A8M1NDA0_DANRE]	5	7	17	7.66428e+08	2.70552e+08	2.83283	24.5437	41.74	7	10	21.1352	41.74	6	7	4	6	14	9.32008e+08	5.5583e+08	1.67679	12.7091	37.39	5	7	15.389	33.04	5	7	2.25481	6.5	8.49218e+08
A0A8M2B3J4	Clathrin heavy chain OS=Danio rerio OX=7955 GN=cltcb PE=3 SV=1 - [A0A8M2B3J4_DANRE]															1	7	9	9.3147e+06	4.18958e+06	2.2233	6.83711	3.5	7	7	2.10735	1.19	2	2	2.2233	7	9.3147e+06
A0A8M1N1X8	Unconventional myosin-VI OS=Danio rerio OX=7955 GN=myo6b PE=3 SV=1 - [A0A8M1N1X8_DANRE]	20	20	22	3.65891e+07	0		48.0081	18.47	20	22					11	16	21	1.81573e+07	8.57027e+06	2.11863	29.664	14.92	16	16	12.0343	4.97	5	5	2.11863	18	2.73732e+07
A0A8M1NBC4	POU domain protein OS=Danio rerio OX=7955 GN=zgc:158291 PE=3 SV=1 - [A0A8M1NBC4_DANRE]															2	2	3	5.38449e+06	2.54412e+06	2.11645	2.16361	4.08	1	1	1.76619	6.71	2	2	2.11645	2	5.38449e+06
A0A8M3AWS2	Clathrin heavy chain OS=Danio rerio OX=7955 GN=cltca PE=3 SV=1 - [A0A8M3AWS2_DANRE]															1	7	9	9.3147e+06	4.55006e+06	2.04716	8.59051	3.5	7	7	3.80026	1.19	2	2	2.04716	7	9.3147e+06
A0A8M1NA99	myosin-Ig OS=Danio rerio OX=7955 GN=myo1g PE=3 SV=1 - [A0A8M1NA99_DANRE]															1	1	1	0	0						0	0.7	1	1	#DIV/0!	1	0
A0A8M1ND41	histone-lysine N-methyltransferase NSD2 OS=Danio rerio OX=7955 GN=nsd2 PE=4 SV=1 - [A0A8M1ND41_DANRE]	1	1	2	0	0		2.856	0.68	1	1	2.50206	0.68	1	1															#DIV/0!	1	0
A0A8M1NF66	E3 ubiquitin-protein ligase LRSAM1 OS=Danio rerio OX=7955 GN=lrsam1 PE=4 SV=1 - [A0A8M1NF66_DANRE]	1	1	1	0	0		2.44064	1.39	1	1																			#DIV/0!	1	0
A0A8M1NFC3	Methylcrotonoyl-CoA carboxylase OS=Danio rerio OX=7955 GN=si:ch211-198n5.11 PE=3 SV=1 - [A0A8M1NFC3_DANRE]															1	1	1	0	0						1.67676	1.82	1	1	#DIV/0!	1	0
A0A8M1NRM0	Phospholipase OS=Danio rerio OX=7955 GN=pld1a PE=3 SV=1 - [A0A8M1NRM0_DANRE]															1	1	1	0	0		2.20966	1.57	1	1					#DIV/0!	1	0
A0A8M1P3F0	Malate synthase OS=Danio rerio OX=7955 GN=mlsl PE=4 SV=1 - [A0A8M1P3F0_DANRE]	1	1	1	0	0						0	2.73	1	1	1	1	1	0	0		2.10787	2.91	1	1					#DIV/0!	1	0
A0A8M1PIV7	ras homolog family member Ca OS=Danio rerio OX=7955 GN=rhoca PE=4 SV=1 - [A0A8M1PIV7_DANRE]															1	1	2	0	0						1.6176	5.7	1	2	#DIV/0!	1	0
A0A8M1Q277	TNFAIP3-interacting protein 1 OS=Danio rerio OX=7955 GN=si:ch211-153b23.7 PE=4 SV=1 - [A0A8M1Q277_DANRE]	1	1	1	0	0		1.63491	2.54	1	1																			#DIV/0!	1	0
A0A8M1RF93	putative all-trans-retinol 13,14-reductase OS=Danio rerio OX=7955 GN=si:ch1073-13h15.3 PE=3 SV=1 - [A0A8M1RF93_DANRE]															1	1	1	0	0		0	1.95	1	1					#DIV/0!	1	0
A0A8M1RHN5	Non-specific serine/threonine protein kinase OS=Danio rerio OX=7955 GN=atm PE=3 SV=1 - [A0A8M1RHN5_DANRE]															1	1	1	0	0		0	0.42	1	1					#DIV/0!	1	0
A0A8M1RI06	uncharacterized protein wu:fi37e09 OS=Danio rerio OX=7955 GN=wu:fi37e09 PE=4 SV=1 - [A0A8M1RI06_DANRE]	1	1	1	0	0		0	2.03	1	1					1	1	1	0	0						0	2.03	1	1	#DIV/0!	1	0
A0A8M2B3V0	coiled-coil domain-containing protein 9 isoform X1 OS=Danio rerio OX=7955 GN=ccdc9 PE=4 SV=1 - [A0A8M2B3V0_DANRE]															1	1	1	0	0		2.01725	1.9	1	1					#DIV/0!	1	0
A0A8M2BET3	vacuolar protein sorting-associated protein 13A isoform X1 OS=Danio rerio OX=7955 GN=vps13a PE=3 SV=1 - [A0A8M2BET3_DANRE]															1	1	1	0	0						2.82992	0.46	1	1	#DIV/0!	1	0
A0A8M2BGU4	stereocilin-like OS=Danio rerio OX=7955 GN=si:ch211-150j10.4 PE=4 SV=1 - [A0A8M2BGU4_DANRE]	1	1	1	0	0		2.71054	0.9	1	1																			#DIV/0!	1	0
A0A8M2BII8	Microtubule-associated protein OS=Danio rerio OX=7955 GN=map4l PE=4 SV=1 - [A0A8M2BII8_DANRE]	1	1	1	0	0		2.39035	0.94	1	1																			#DIV/0!	1	0
A0A8M2BKC3	ATP-binding cassette, sub-family A (ABC1), member 1B isoform X1 OS=Danio rerio OX=7955 GN=abca1b PE=4 SV=1 - [A0A8M2BKC3_DANRE]															1	1	1	0	0						1.94725	0.74	1	1	#DIV/0!	1	0
A0A8M2BKQ4	mitogen-activated protein kinase kinase kinase kinase 5-like OS=Danio rerio OX=7955 GN=LOC101883459 PE=4 SV=1 - [A0A8M2BKQ4_DANRE]															1	1	1	0	0		0	3.86	1	1					#DIV/0!	1	0
A0A8M3ANA9	phosphofurin acidic cluster sorting protein 2 isoform X1 OS=Danio rerio OX=7955 GN=si:ch211-126j24.1 PE=3 SV=1 - [A0A8M3ANA9_DANRE]	1	1	1	0	0		1.95965	1.92	1	1																			#DIV/0!	1	0
A0A8M3AW15	HECT-type E3 ubiquitin transferase OS=Danio rerio OX=7955 GN=hecw2a PE=4 SV=1 - [A0A8M3AW15_DANRE]															1	1	1	0	0						2.18139	0.81	1	1	#DIV/0!	1	0
A0A8M3AX48	sushi, nidogen and EGF-like domain-containing protein 1 OS=Danio rerio OX=7955 GN=LOC100148750 PE=4 SV=1 - [A0A8M3AX48_DANRE]															1	1	1	0	0		1.73004	2.83	1	1					#DIV/0!	1	0
A0A8M3AXQ6	Non-specific serine/threonine protein kinase OS=Danio rerio OX=7955 GN=mast1b PE=3 SV=1 - [A0A8M3AXQ6_DANRE]	1	1	2	0	0		0	1.16	1	2																			#DIV/0!	1	0
A0A8M3AYU3	pleckstrin homology domain-containing family G member 4B isoform X1 OS=Danio rerio OX=7955 GN=si:dkey-65j6.2 PE=4 SV=1 - [A0A8M3AYU3_DANRE]															1	1	1	0	0						0	0.44	1	1	#DIV/0!	1	0
A0A8M6YYK0	double C2-like domain-containing protein beta isoform X1 OS=Danio rerio OX=7955 GN=doc2b PE=4 SV=1 - [A0A8M6YYK0_DANRE]	1	1	1	0	0		1.89744	2.31	1	1																			#DIV/0!	1	0
A0A8M9PBT4	MAGUK p55 subfamily member 7-like OS=Danio rerio OX=7955 GN=mpp7b PE=3 SV=1 - [A0A8M9PBT4_DANRE]	1	1	1	0	0		2.85327	5.37	1	1																			#DIV/0!	1	0
A0A8M9PCE0	filamin-A-interacting protein 1 OS=Danio rerio OX=7955 GN=filip1 PE=4 SV=1 - [A0A8M9PCE0_DANRE]															1	1	1	0	0		2.64056	1.38	1	1					#DIV/0!	1	0
A0A8M9PD90	potassium channel subfamily K member 13-like OS=Danio rerio OX=7955 GN=kcnk12l PE=3 SV=1 - [A0A8M9PD90_DANRE]															1	1	1	0	0		2.22748	2.13	1	1					#DIV/0!	1	0
A0A8M9PDG6	cathepsin L1 OS=Danio rerio OX=7955 GN=cts12 PE=3 SV=1 - [A0A8M9PDG6_DANRE]															1	1	2	0	0						0	3.44	1	2	#DIV/0!	1	0
A0A8M9PGR9	cytoplasmic phosphatidylinositol transfer protein 1 OS=Danio rerio OX=7955 GN=pitpnc1 PE=4 SV=1 - [A0A8M9PGR9_DANRE]															1	1	1	0	0		0	5.42	1	1					#DIV/0!	1	0
A0A8M9PSC8	natural killer cell receptor 2B4-like OS=Danio rerio OX=7955 GN=LOC103909541 PE=4 SV=1 - [A0A8M9PSC8_DANRE]															1	1	2	0	0		4.14681	5.37	1	2					#DIV/0!	1	0
A0A8M9PUM3	uncharacterized protein si:dkey-224b4.5 isoform X1 OS=Danio rerio OX=7955 GN=si:dkey-224b4.5 PE=4 SV=1 - [A0A8M9PUM3_DANRE]	1	1	1	0	0		0	3.18	1	1																			#DIV/0!	1	0
A0A8M9PZJ6	LIM and calponin homology domains-containing protein 1 isoform X1 OS=Danio rerio OX=7955 GN=limch1b PE=4 SV=1 - [A0A8M9PZJ6_DANRE]	1	1	1	0	0		2.02651	0.99	1	1																			#DIV/0!	1	0
A0A8M9QD12	Inositol hexakisphosphate and diphosphoinositol-pentakisphosphate kinase OS=Danio rerio OX=7955 GN=ppip5k1a PE=3 SV=1 - [A0A8M9QD12_DANRE]															1	1	1	0	0						0	0.64	1	1	#DIV/0!	1	0
A0A8M9QG71	ankyrin-1-like OS=Danio rerio OX=7955 GN=LOC110440189 PE=4 SV=1 - [A0A8M9QG71_DANRE]															1	1	1	0	0						2.40005	3.69	1	1	#DIV/0!	1	0
A0A8M9QH00	adhesion G protein-coupled receptor E3-like isoform X1 OS=Danio rerio OX=7955 GN=adgre15 PE=4 SV=1 - [A0A8M9QH00_DANRE]	1	1	1	0	0		1.86818	3.5	1	1					1	1	1	0	0		2.30469	3.5	1	1					#DIV/0!	1	0
A0A8N7TB53	rho GTPase-activating protein 23 OS=Danio rerio OX=7955 GN=arhgap23b PE=4 SV=1 - [A0A8N7TB53_DANRE]															1	1	1	0	0						2.10989	1.03	1	1	#DIV/0!	1	0
A0A8N7TDH5	G/T mismatch-specific thymine DNA glycosylase-like isoform X1 OS=Danio rerio OX=7955 GN=tdg.2 PE=4 SV=1 - [A0A8N7TDH5_DANRE]															1	1	1	0	0		1.73257	3	1	1					#DIV/0!	1	0
A0A8N7UQV9	serine/threonine-protein kinase SBK1-like OS=Danio rerio OX=7955 GN=si:ch211-183d21.3 PE=4 SV=1 - [A0A8N7UQV9_DANRE]															1	1	1	0	0		1.76473	3.25	1	1					#DIV/0!	1	0
Q642H3	Septin-8-A OS=Danio rerio OX=7955 GN=sept8a PE=2 SV=2 - [SEP8A_DANRE]															1	1	1	0	0						0	2.62	1	1	#DIV/0!	1	0
Q7SZE3	LLGL scribble cell polarity complex component 2 OS=Danio rerio OX=7955 GN=llgl2 PE=1 SV=1 - [L2GL2_DANRE]															1	1	1	0	0		2.21425	1.37	1	1					#DIV/0!	1	0
Q8UVJ6	Vang-like protein 2 OS=Danio rerio OX=7955 GN=vangl2 PE=1 SV=1 - [VANG2_DANRE]															1	1	1	0	0		2.4128	2.28	1	1					#DIV/0!	1	0
A0A8N7UVM4	elongation factor 2 OS=Danio rerio OX=7955 GN=eef2l2 PE=3 SV=1 - [A0A8N7UVM4_DANRE]															1	1	2	3.58105e+06	1.85538e+06	1.93008	0	0.7	1	1	0	0.7	1	1	1.93008	1	3.58105e+06
A0A8M3AJG6	protein piccolo isoform X1 OS=Danio rerio OX=7955 GN=pclob PE=4 SV=1 - [A0A8M3AJG6_DANRE]															9	10	13	1.3073e+07	7.14205e+06	1.83043	16.8555	1.31	10	10	5.52503	0.35	3	3	1.83043	10	1.3073e+07
A0A8N7TCW2	cartilage intermediate layer protein 2 OS=Danio rerio OX=7955 GN=cilp2 PE=4 SV=1 - [A0A8N7TCW2_DANRE]	1	1	1	0	909714992	0					2.0723	0.88	1	1	1	1	4	1.17656e+09	324349131	3.62745	0	0.88	1	3	1.91523	0.88	1	1	1.81373	1	5.8828e+08
A0A8M2BEM6	IQ motif and SEC7 domain-containing protein 1 isoform X1 OS=Danio rerio OX=7955 GN=iqsec2b PE=3 SV=1 - [A0A8M2BEM6_DANRE]															1	3	5	1.89105e+07	1.10648e+07	1.70907	2.10694	0.51	1	1	4.95878	2.02	3	4	1.70907	3	1.89105e+07
A0A8N1Z0T1	uncharacterized protein LOC563253 OS=Danio rerio OX=7955 GN=si:ch211-198a12.6 PE=4 SV=1 - [A0A8N1Z0T1_DANRE]															3	3	3	6.1257e+06	3.68283e+06	1.66331	2.29915	4.01	2	2	0	1.91	1	1	1.66331	3	6.1257e+06
A0A8N7TF89	histone H1-like OS=Danio rerio OX=7955 GN=si:ch1073-159d7.7 PE=3 SV=1 - [A0A8N7TF89_DANRE]	1	8	20	1.55383e+09	1.17984e+09	1.31699	28.7391	25.38	7	11	25.5871	20.3	6	9	1	6	18	1.34697e+09	6.90214e+08	1.95153	16.5905	20.3	6	9	24.7853	14.21	4	9	1.63426	6.5	1.4504e+09
A0A8M6YYI1	histone H1-like OS=Danio rerio OX=7955 GN=si:dkey-261m9.12 PE=3 SV=1 - [A0A8M6YYI1_DANRE]	2	8	21	1.55383e+09	1.17391e+09	1.32363	28.1446	24.62	7	11	26.8001	24.62	7	10	1	6	19	1.32762e+09	6.96165e+08	1.90704	18.206	20.1	6	9	26.7523	20.1	5	10	1.61534	6.5	1.44073e+09
A0A8M3AVH5	RIMS-binding protein 2 isoform X2 OS=Danio rerio OX=7955 GN=rimbp2 PE=3 SV=1 - [A0A8M3AVH5_DANRE]															10	10	17	4.09034e+07	2.64814e+07	1.54461	17.9341	6.79	10	10	11.2939	4.35	7	7	1.54461	10	4.09034e+07
A0A8M9QFN8	mitogen-activated protein kinase kinase kinase kinase 4 isoform X1 OS=Danio rerio OX=7955 GN=map4k4 PE=4 SV=1 - [A0A8M9QFN8_DANRE]															1	1	3	5.71992e+06	3.70945e+06	1.54199	1.78426	0.7	1	1	0	0.7	1	2	1.54199	1	5.71992e+06
A0A8M1Q6T5	histone H1-like OS=Danio rerio OX=7955 GN=si:ch211-113a14.18 PE=3 SV=1 - [A0A8M1Q6T5_DANRE]	3	11	29	1.64985e+09	1.44016e+09	1.1456	39.8917	25.63	10	15	39.6173	25.63	10	14	2	8	25	1.50085e+09	8.3908e+08	1.78868	25.0066	25.63	8	13	30.7531	24.62	6	12	1.46714	9	1.57535e+09
A0A8M2BI26	histone H1-like OS=Danio rerio OX=7955 GN=si:dkey-108k21.21 PE=3 SV=1 - [A0A8M2BI26_DANRE]	2	11	29	1.70749e+09	1.51796e+09	1.12486	38.7414	22.51	10	15	38.8283	18.82	9	14	2	8	24	1.50085e+09	8.3908e+08	1.78868	26.0731	18.82	8	12	32.1959	18.82	7	12	1.45677	9	1.60417e+09
Q6PBY0	Guanine nucleotide-binding protein subunit beta-5b OS=Danio rerio OX=7955 GN=gnb5b PE=2 SV=1 - [GNB5B_DANRE]															1	1	2	3.3513e+06	2.3202e+06	1.4444	2.56847	4.56	1	1	2.39072	4.56	1	1	1.4444	1	3.3513e+06
Q6PBW5	Retinoid isomerohydrolase OS=Danio rerio OX=7955 GN=rpe65a PE=2 SV=1 - [RP65A_DANRE]	1	1	1	4.07843e+06	0		2.18781	1.88	1	1					10	10	11	2.91881e+07	2.02313e+07	1.44272	20.3894	21.66	9	9	4.7635	5.08	2	2	1.44272	5.5	1.66332e+07
A0A8M1PE26	RNA helicase OS=Danio rerio OX=7955 GN=ddx54 PE=3 SV=1 - [A0A8M1PE26_DANRE]	2	2	4	4.57686e+06	6.73186e+06	0.67988	4.51467	3.36	2	2	4.61501	3.36	2	2	2	2	3	5.78299e+06	2.84574e+06	2.03216	3.29909	3.13	2	2	2.62358	2.2	1	1	1.35602	2	5.17992e+06
A0A8M1NWK9	heat shock cognate 70 kDa protein OS=Danio rerio OX=7955 GN=hspa8b PE=3 SV=1 - [A0A8M1NWK9_DANRE]	4	4	4	9.30829e+06	0		4.85492	7.57	4	4					3	3	4	5.62821e+06	4.18587e+06	1.34457	4.91307	5.87	3	3	2.27247	2.01	1	1	1.34457	3.5	7.46825e+06
A0A8M9PQW6	Voltage-dependent L-type calcium channel subunit alpha OS=Danio rerio OX=7955 GN=cacna1fb PE=3 SV=1 - [A0A8M9PQW6_DANRE]															3	3	4	3.93679e+06	3.01072e+06	1.30759	4.02322	1.6	2	2	3.72826	1.21	2	2	1.30759	3	3.93679e+06
A0A8M3AXP5	AP-3 complex subunit delta-1 isoform X1 OS=Danio rerio OX=7955 GN=ap3d1 PE=3 SV=1 - [A0A8M3AXP5_DANRE]	11	11	20	2.97959e+07	3.93114e+07	0.757945	20.1833	8.58	9	9	25.1727	8.11	9	11	9	9	17	1.08546e+08	5.95773e+07	1.82193	15.629	8.11	8	9	14.8185	7.17	7	8	1.28994	9	6.91708e+07
A0A8M1N2A2	ATP-dependent 6-phosphofructokinase OS=Danio rerio OX=7955 GN=pfkma PE=3 SV=1 - [A0A8M1N2A2_DANRE]															3	5	8	4.74153e+07	3.67994e+07	1.28848	11.1013	8.8	5	5	7.66036	5.48	3	3	1.28848	5	4.74153e+07
A0A8M1RE46	centromere protein F isoform X1 OS=Danio rerio OX=7955 GN=cenpf PE=4 SV=1 - [A0A8M1RE46_DANRE]	1	1	1	1577079729	0		2.10049	0.44	1	1					1	1	4	1630589801	1296530636	1.25766	2.091	0.44	1	2	4.23463	0.44	1	2	1.25766	1	1603834765
A0A8M1PF78	Peptidylprolyl isomerase OS=Danio rerio OX=7955 GN=fkbp8 PE=4 SV=1 - [A0A8M1PF78_DANRE]	1	1	4	2346928766	0		1.90326	1.48	1	3	0	1.48	1	1	1	1	6	1.2284e+09	977816483	1.25627	0	1.48	1	3	0	1.48	1	3	1.25627	1	1.78766e+09
A0A8M2B4V0	band 4.1-like protein 4B isoform X1 OS=Danio rerio OX=7955 GN=epb41l4b PE=4 SV=1 - [A0A8M2B4V0_DANRE]															1	1	2	1.55405e+07	1.23903e+07	1.25425	0	1.1	1	1	1.7322	1.1	1	1	1.25425	1	1.55405e+07
A0A8M1RHP2	[Histone H3]-lysine(4) N-methyltransferase OS=Danio rerio OX=7955 GN=kmt2bb PE=4 SV=1 - [A0A8M1RHP2_DANRE]	16	16	21	2.38336e+07	1.62026e+07	1.47098	31.3472	3.02	12	13	20.0833	2.25	8	8	12	12	18	9.34049e+06	9.10327e+06	1.02606	15.4115	2.49	8	8	13.4947	2.47	8	10	1.24852	12	1.6587e+07
A0A8M9PAY2	ATP-dependent 6-phosphofructokinase OS=Danio rerio OX=7955 GN=pfkpb PE=3 SV=1 - [A0A8M9PAY2_DANRE]															6	11	18	5.78645e+07	4.90514e+07	1.17967	16.3066	14.2	8	8	25.9208	16.98	9	10	1.17967	11	5.78645e+07
A0A8M1P9E8	Alpha-1,4 glucan phosphorylase OS=Danio rerio OX=7955 GN=pygmb PE=3 SV=1 - [A0A8M1P9E8_DANRE]															3	3	3	7.76122e+06	6.70381e+06	1.15773	2.75775	1.9	1	1	4.62001	2.49	2	2	1.15773	3	7.76122e+06
A0A8M2B2S6	protein bassoon OS=Danio rerio OX=7955 GN=bsnb PE=4 SV=1 - [A0A8M2B2S6_DANRE]															1	5	10	6.47492e+07	5.60745e+07	1.1547	12.7385	0.94	4	5	7.42567	1.26	5	5	1.1547	5	6.47492e+07
A0A8N7T8I4	chromosomal protein D1 OS=Danio rerio OX=7955 GN=si:ch211-288g17.3 PE=4 SV=1 - [A0A8N7T8I4_DANRE]	5	5	8	4.68524e+06	1.64005e+07	0.285678	4.04985	2.65	2	2	12.5276	12.43	5	6	4	4	6	8.36923e+06	4.1891e+06	1.99786	2.25892	8.73	3	3	5.62377	5.82	3	3	1.14177	3	6.52724e+06
A0A8M9PMF7	zinc finger protein 1035 OS=Danio rerio OX=7955 GN=znf1035 PE=4 SV=1 - [A0A8M9PMF7_DANRE]	1	1	1	0	2.61276e+06	0					2.84726	0.41	1	1	3	3	4	2.53647e+07	1.11689e+07	2.271	5.22627	0.79	2	2	5.85556	0.9	2	2	1.1355	3	1.26823e+07
A0A8M6Z399	Dymeclin OS=Danio rerio OX=7955 GN=dym PE=3 SV=1 - [A0A8M6Z399_DANRE]	1	1	2	673435224	594937139	1.13194	2.33406	1.79	1	1	2.64348	1.79	1	1															1.13194	1	673435224
Q7ZUV1	Pleckstrin homology domain-containing family F member 2 OS=Danio rerio OX=7955 GN=plekhf2 PE=2 SV=1 - [PKHF2_DANRE]															1	1	2	4.87613e+06	4.31771e+06	1.12933	2.24555	4.45	1	1	2.15921	4.45	1	1	1.12933	1	4.87613e+06
A0A8M1N2E8	Signal recognition particle subunit SRP68 OS=Danio rerio OX=7955 GN=srp68 PE=3 SV=1 - [A0A8M1N2E8_DANRE]															2	2	3	2.94897e+06	2.65835e+06	1.10932	1.80071	1.69	1	1	1.61902	3.54	2	2	1.10932	2	2.94897e+06
A0A8M1P8M3	collagen alpha-2(I) chain precursor OS=Danio rerio OX=7955 GN=col1a2 PE=4 SV=1 - [A0A8M1P8M3_DANRE]	12	12	27	1.71792e+08	7.78591e+07	2.20644	39.1089	11.17	11	17	23.269	7.1	8	10	1	1	1	0	1.67229e+06	0					2.13203	0.89	1	1	1.10322	6	8.58958e+07
A0A8M6YZA4	LOW QUALITY PROTEIN: uncharacterized protein LOC100038789 OS=Danio rerio OX=7955 GN=zgc:163040 PE=3 SV=1 - [A0A8M6YZA4_DANRE]															6	6	8	8.88692e+07	8.07279e+07	1.10085	1.69511	11.76	3	3	6.35009	20	5	5	1.10085	6	8.88692e+07
A0A8M1N9C1	Histone H2A OS=Danio rerio OX=7955 GN=h2az2b PE=3 SV=1 - [A0A8M1N9C1_DANRE]															1	2	5	126725230	1.16786e+08	1.0851	3.80874	12.5	2	3	4.1044	12.5	2	2	1.0851	2	126725230
A0A8M9PKW2	Acetyl-CoA carboxylase OS=Danio rerio OX=7955 GN=acacb PE=4 SV=1 - [A0A8M9PKW2_DANRE]	50	65	175	4.43591e+09	4.07907e+09	1.08748	194.673	27.03	60	96	197.023	25.44	55	79	40	55	111	3.14892e+09	3.01541e+09	1.04428	101.532	20.12	44	61	97.5654	16.72	36	50	1.06588	57.5	3.79242e+09
A0A8M2B9C5	ATP-dependent 6-phosphofructokinase OS=Danio rerio OX=7955 GN=pfkpa PE=3 SV=1 - [A0A8M2B9C5_DANRE]															5	11	17	5.79476e+07	5.51303e+07	1.0511	19.9775	16.35	10	10	19.3794	12.17	6	7	1.0511	11	5.79476e+07
A0A8M2B723	protein NLRC3 OS=Danio rerio OX=7955 GN=si:ch211-114l13.1 PE=4 SV=1 - [A0A8M2B723_DANRE]															3	3	4	4.87924e+06	4.73967e+06	1.02945	3.76674	1.53	1	1	7.98549	4.19	3	3	1.02945	3	4.87924e+06
A0A8M6Z6E5	LIM domain-containing protein A OS=Danio rerio OX=7955 GN=si:dkey-273o13.3 PE=4 SV=1 - [A0A8M6Z6E5_DANRE]															9	9	16	2.36654e+07	2.31543e+07	1.02207	17.8446	5.59	8	9	11.1112	4.91	6	7	1.02207	9	2.36654e+07
A0A8M1NAS3	polyubiquitin-C OS=Danio rerio OX=7955 GN=ubc PE=4 SV=1 - [A0A8M1NAS3_DANRE]	4	4	5	6.39061e+07	8.68554e+07	0.735776	4.9638	28.89	2	2	9.11588	49.91	3	3	4	4	8	8.17781e+07	6.30417e+07	1.29721	8.0561	40.71	3	4	6.16832	49.91	3	4	1.01649	3	7.28421e+07
A0A8M1N9L7	methylcrotonoyl-CoA carboxylase subunit alpha, mitochondrial OS=Danio rerio OX=7955 GN=mccc1 PE=4 SV=1 - [A0A8M1N9L7_DANRE]	25	26	235	7.8088e+09	8.658e+09	0.901917	343.99	29.68	25	132	316.289	27	21	103	23	24	162	4.40696e+09	3.89901e+09	1.13028	200.211	27.57	21	87	187.674	30.1	23	75	1.0161	24.5	6.10788e+09
A0A8M9PS32	A-kinase anchor protein 9 OS=Danio rerio OX=7955 GN=akap9 PE=4 SV=1 - [A0A8M9PS32_DANRE]															4	4	5	7.28423e+08	7.37996e+08	0.987029	1.99234	0.4	2	2	5.71802	1.77	3	3	0.987029	4	7.28423e+08
A0A8M1PEW0	Phosphopyruvate hydratase OS=Danio rerio OX=7955 GN=eno1b PE=3 SV=1 - [A0A8M1PEW0_DANRE]															2	3	5	1.50557e+07	1.5355e+07	0.980509	4.84404	8.08	3	3	0	3.93	2	2	0.980509	3	1.50557e+07
A0A8M9PVT7	60S ribosomal protein L6-like OS=Danio rerio OX=7955 GN=LOC103910031 PE=4 SV=1 - [A0A8M9PVT7_DANRE]															1	1	2	2.2902e+07	2.3402e+07	0.978632	0	3.97	1	1	0	3.97	1	1	0.978632	1	2.2902e+07
A0A8M1QUW7	protein bassoon isoform X1 OS=Danio rerio OX=7955 GN=bsna PE=4 SV=1 - [A0A8M1QUW7_DANRE]															66	70	145	1.10108e+08	1.12517e+08	0.978591	162.994	17.31	61	87	113.9	13.74	48	58	0.978591	70	1.10108e+08
A0A8M1P1T0	pre-rRNA processing protein FTSJ3 OS=Danio rerio OX=7955 GN=ftsj3 PE=3 SV=1 - [A0A8M1P1T0_DANRE]	5	5	7	1.56158e+07	1.0933e+07	1.42831	6.02245	5.01	4	5	3.71543	2.03	2	2	4	4	8	5.85542e+06	1.1139e+07	0.525667	4.92081	4.18	3	3	5.53802	3.94	3	5	0.976988	4	1.07356e+07
Q7T356	14-3-3 protein beta/alpha-B OS=Danio rerio OX=7955 GN=ywhabb PE=2 SV=1 - [143BB_DANRE]															4	4	5	7.14624e+06	7.36128e+06	0.970787	7.34564	13.64	3	3	5.00324	8.68	2	2	0.970787	4	7.14624e+06
A0A8M1P6D7	ubiquitin carboxyl-terminal hydrolase 36 OS=Danio rerio OX=7955 GN=usp36 PE=4 SV=1 - [A0A8M1P6D7_DANRE]	10	10	12	8.29414e+06	7.37436e+06	1.12473	16.0461	8.15	8	8	9.73077	5.07	4	4	7	7	9	4.49837e+06	5.55945e+06	0.80914	9.71566	5.89	5	5	7.475	5.8	4	4	0.966933	7.5	6.39626e+06
A0A8M1N0G8	60S ribosomal protein L35a OS=Danio rerio OX=7955 GN=rpl35a PE=3 SV=1 - [A0A8M1N0G8_DANRE]	3	3	4	2.14826e+07	2.23653e+07	0.960536	1.62887	6.36	1	1	4.00687	20.91	3	3	2	2	2	2.24445e+07	0		3.88975	14.55	2	2					0.960536	1.5	2.19636e+07
A0A8M9PQC3	DNA helicase OS=Danio rerio OX=7955 GN=chd2 PE=4 SV=1 - [A0A8M9PQC3_DANRE]	10	10	16	2.1504e+07	2.48943e+07	0.863814	8.84164	3.41	7	7	18.5686	4.18	9	9	5	5	7	7.53009e+06	7.43701e+06	1.01252	4.2671	2.59	5	5	0	0.88	2	2	0.938165	6	1.45171e+07
Q7ZWJ7	60S ribosomal protein L34 OS=Danio rerio OX=7955 GN=rpl34 PE=3 SV=3 - [RL34_DANRE]	11	11	56	4.01863e+09	5.83177e+09	0.689092	46.7523	50.43	10	26	55.1521	49.57	10	30	10	10	42	2.35031e+09	1.98095e+09	1.18646	22.7007	47.86	8	17	35.3131	51.28	9	25	0.937775	10	3.18447e+09
A0A8M1QHD3	Neurotrypsin OS=Danio rerio OX=7955 GN=prss12 PE=4 SV=1 - [A0A8M1QHD3_DANRE]	1	1	1	2.97988e+08	0		0	0.73	1	1					1	1	2	2.56594e+08	2.85818e+08	0.897753	0	0.73	1	1	0	0.73	1	1	0.897753	1	2.77291e+08
Q9W6A9	Opsin-1, short-wave-sensitive 1 OS=Danio rerio OX=7955 GN=opn1sw1 PE=1 SV=2 - [OP1S1_DANRE]	3	3	5	8.35779e+06	7.48543e+06	1.11654	2.57408	4.17	1	1	10.5107	7.44	3	4	9	9	22	1.22803e+08	1.81605e+08	0.676212	20.1832	23.21	7	10	29.0268	24.4	8	12	0.896376	5	6.55806e+07
A0A8M3B1P0	protein piccolo isoform X1 OS=Danio rerio OX=7955 GN=pcloa PE=4 SV=1 - [A0A8M3B1P0_DANRE]															4	5	8	3.66758e+06	4.12161e+06	0.88984	4.61096	0.83	3	3	9.86168	1.55	5	5	0.88984	5	3.66758e+06
Q9W6A7	Red-sensitive opsin-1 OS=Danio rerio OX=7955 GN=opn1lw1 PE=1 SV=1 - [OPSR1_DANRE]															1	5	11	3.40198e+07	3.82431e+07	0.889567	13.8855	13.45	5	6	12.4929	10.08	4	5	0.889567	5	3.40198e+07
Q9W6A8	Opsin-1, short-wave-sensitive 2 OS=Danio rerio OX=7955 GN=opn1sw2 PE=1 SV=1 - [OP1S2_DANRE]	1	1	2	1.02197e+07	1.15978e+07	0.881171	2.421	4.24	1	1	3.1141	4.24	1	1	2	2	2	3.93544e+07	0		0	6.21	2	2					0.881171	1.5	2.4787e+07
A0A8M6Z1M4	histone H3-like OS=Danio rerio OX=7955 GN=LOC570405 PE=3 SV=1 - [A0A8M6Z1M4_DANRE]	6	6	10	7.77113e+07	8.94744e+07	0.868531	4.07271	17.36	5	5	7.74509	18.6	5	5															0.868531	5	7.77113e+07
Q8AYN0	Red-sensitive opsin-2 OS=Danio rerio OX=7955 GN=opn1lw2 PE=1 SV=1 - [OPSR2_DANRE]	1	1	1	2.40777e+06	0		0	3.37	1	1					1	5	8	3.30095e+07	3.82431e+07	0.863149	11.0913	13.48	5	5	6.49665	5.9	3	3	0.863149	3	1.77086e+07
A0A8M9PWI4	Calcium-transporting ATPase OS=Danio rerio OX=7955 GN=atp2b3b PE=3 SV=1 - [A0A8M9PWI4_DANRE]	1	1	1	3.27772e+06	0		0	1.31	1	1					6	6	9	1.05719e+07	1.2318e+07	0.858247	9.0355	4.01	4	4	11.7411	5.09	5	5	0.858247	3.5	6.92481e+06
A0A8M1NYQ3	60S ribosomal protein L17 OS=Danio rerio OX=7955 GN=rpl17 PE=3 SV=1 - [A0A8M1NYQ3_DANRE]	10	10	22	1.8659e+08	3.2014e+08	0.582839	22.8363	43.48	9	11	26.7263	35.87	8	11	11	11	28	4.7816e+08	4.25738e+08	1.12313	30.164	45.11	10	18	19.71	36.96	7	10	0.852985	10	3.32375e+08
Q7ZV82	60S ribosomal protein L27 OS=Danio rerio OX=7955 GN=rpl27 PE=2 SV=3 - [RL27_DANRE]	4	4	6	2.30576e+08	4.46663e+08	0.51622	8.26245	25	4	4	4.75632	14.71	2	2	6	6	9	1.6792e+08	1.42781e+08	1.17607	7.7617	20.59	4	4	6.00283	35.29	5	5	0.846144	5	1.99248e+08
A0A8M9QH85	uncharacterized protein LOC797385 OS=Danio rerio OX=7955 GN=tmem125b PE=4 SV=1 - [A0A8M9QH85_DANRE]	1	1	2	1843177313	2.18737e+09	0.842644	2.09848	2.76	1	1	2.59833	2.76	1	1															0.842644	1	1843177313
A0A8N7TEC8	transketolase-like OS=Danio rerio OX=7955 GN=tkta PE=4 SV=1 - [A0A8N7TEC8_DANRE]	15	15	34	1.1296e+08	1.19908e+08	0.942056	32.4178	24.84	14	16	46.2166	22.13	13	18	25	25	87	1.00569e+09	1.38959e+09	0.723732	78.2685	29.14	19	38	100.743	30.25	22	49	0.832894	19.5	5.59324e+08
A0A8M1MZM2	cytochrome b-c1 complex subunit 2, mitochondrial OS=Danio rerio OX=7955 GN=uqcrc2b PE=3 SV=1 - [A0A8M1MZM2_DANRE]															4	4	4	5.3814e+06	6.49919e+06	0.82801	1.97812	2.2	1	1	6.66326	10.79	3	3	0.82801	4	5.3814e+06
A0A8M1NG49	Hexokinase OS=Danio rerio OX=7955 GN=hkdc1 PE=3 SV=1 - [A0A8M1NG49_DANRE]															2	2	2	6.42388e+06	7.87034e+06	0.816214	1.95307	1.31	1	1	1.76098	0.87	1	1	0.816214	2	6.42388e+06
A0A8M9PK80	Acetyl-CoA carboxylase OS=Danio rerio OX=7955 GN=acaca PE=4 SV=1 - [A0A8M9PK80_DANRE]	90	105	591	4.30835e+09	4.57954e+09	0.940783	678.964	37.65	104	307	760.92	36.25	98	284	91	106	451	1.70948e+09	2.49899e+09	0.684068	427.276	36.54	95	203	508.417	38.43	103	248	0.812425	105	3.00891e+09
A0A8M9QFT7	Dynactin subunit 1 OS=Danio rerio OX=7955 GN=dctn1b PE=3 SV=1 - [A0A8M9QFT7_DANRE]															1	1	2	695255	857540	0.810755	2.06926	0.63	1	1	0	0.63	1	1	0.810755	1	695255
A0A8M9PPQ8	unconventional myosin-Va isoform X11 OS=Danio rerio OX=7955 GN=myo5aa PE=3 SV=1 - [A0A8M9PPQ8_DANRE]															8	8	9	3.33102e+06	4.15457e+06	0.801773	4.44738	1.56	3	3	5.82222	3.61	6	6	0.801773	8	3.33102e+06
A0A8M1P2D8	bromodomain adjacent to zinc finger domain protein 2A OS=Danio rerio OX=7955 GN=baz2a PE=3 SV=1 - [A0A8M1P2D8_DANRE]	53	53	103	1.2221e+08	1.18001e+08	1.03568	113.831	19.15	48	60	114.754	16.18	39	43	49	49	83	6.60977e+07	1.16523e+08	0.56725	65.8174	15.89	36	39	71.5539	16.54	38	44	0.801463	48.5	9.4154e+07
A0A8M1RLK2	IQ domain-containing protein E isoform X1 OS=Danio rerio OX=7955 GN=iqce PE=4 SV=1 - [A0A8M1RLK2_DANRE]															1	1	3	1.62868e+09	2.05685e+09	0.791832	3.94411	0.88	1	2	1.96782	0.88	1	1	0.791832	1	1.62868e+09
A0A8M9QNX8	E3 ubiquitin/ISG15 ligase TRIM25-like OS=Danio rerio OX=7955 GN=ftr70 PE=4 SV=1 - [A0A8M9QNX8_DANRE]															1	1	3	1.62868e+09	2.05685e+09	0.791832	3.94411	1.58	1	2	1.96782	1.58	1	1	0.791832	1	1.62868e+09
A0A8M1MZZ4	60S ribosomal protein L21 OS=Danio rerio OX=7955 GN=rpl21 PE=3 SV=1 - [A0A8M1MZZ4_DANRE]	6	6	15	1.0024e+08	1.26924e+08	0.789761	14.4363	35	5	7	24.4875	31.87	5	8	6	6	15	7.47004e+07	9.41811e+07	0.793157	11.1364	22.5	4	7	14.8679	31.25	5	8	0.791459	5.5	8.74701e+07
A0A8M1PK30	Phosphopyruvate hydratase OS=Danio rerio OX=7955 GN=eno3 PE=3 SV=1 - [A0A8M1PK30_DANRE]															2	3	6	2.02941e+07	2.56887e+07	0.790001	7.71411	7.62	3	3	5.01393	7.62	3	3	0.790001	3	2.02941e+07
A0A8N7UUK6	IQ motif and SEC7 domain-containing protein 3 isoform X1 OS=Danio rerio OX=7955 GN=iqsec3b PE=3 SV=1 - [A0A8N7UUK6_DANRE]															2	6	10	8.48045e+06	1.11075e+07	0.763491	6.133	4.76	5	5	4.80741	3.9	4	5	0.763491	6	8.48045e+06
A0A8M1PAR7	cytoplasmic polyadenylation element-binding protein 4 OS=Danio rerio OX=7955 GN=cpeb4b PE=3 SV=1 - [A0A8M1PAR7_DANRE]															1	1	2	1.4153e+07	1.85925e+07	0.761219	3.15787	2.34	1	1	2.26848	2.34	1	1	0.761219	1	1.4153e+07
A0A8M1PHE0	Dihydrolipoamide acetyltransferase component of pyruvate dehydrogenase complex OS=Danio rerio OX=7955 GN=pdhx PE=3 SV=1 - [A0A8M1PHE0_DANRE]															4	4	5	8.27353e+06	1.08887e+07	0.75983	0	2.82	2	2	4.05597	6.25	3	3	0.75983	4	8.27353e+06
A0A8N7T728	Serine/threonine-protein phosphatase OS=Danio rerio OX=7955 GN=ppp1cc PE=3 SV=1 - [A0A8N7T728_DANRE]															3	3	6	5.66262e+06	7.4928e+06	0.755742	8.15762	12.38	3	4	4.92785	8.36	2	2	0.755742	3	5.66262e+06
A0A8M9PNN6	calcium-binding mitochondrial carrier protein Aralar2 OS=Danio rerio OX=7955 GN=slc25a13 PE=3 SV=1 - [A0A8M9PNN6_DANRE]															7	7	10	1.45055e+07	1.93135e+07	0.751057	9.40075	7.65	5	5	8.30732	9.3	5	5	0.751057	7	1.45055e+07
Q8JGR4	60S ribosomal protein L24 OS=Danio rerio OX=7955 GN=rpl24 PE=2 SV=1 - [RL24_DANRE]	7	7	17	478092679	6.07483e+08	0.787005	19.6073	36.31	7	9	20.6816	26.75	5	8	5	5	11	1.33468e+08	1.89586e+08	0.703999	8.51345	23.57	4	5	8.87689	24.2	5	6	0.745502	6	3.05781e+08
A2BIL7	Tyrosine-protein kinase BAZ1B OS=Danio rerio OX=7955 GN=baz1b PE=1 SV=2 - [BAZ1B_DANRE]	8	8	11	9.74986e+06	1.31342e+07	0.742323	10.4695	4.36	6	6	12.1445	3.06	5	5															0.742323	6	9.74986e+06
A0A8M1NUX0	Tubulin alpha chain OS=Danio rerio OX=7955 GN=tuba1a PE=3 SV=1 - [A0A8M1NUX0_DANRE]	1	8	19	6.27169e+07	8.47307e+07	0.740191	16.8244	22.62	7	8	31.8561	22.84	7	11															0.740191	7	6.27169e+07
A0A8M1P8U4	Tubulin alpha chain OS=Danio rerio OX=7955 GN=tuba1b PE=3 SV=1 - [A0A8M1P8U4_DANRE]	1	8	21	6.27169e+07	8.47307e+07	0.740191	22.0618	22.72	7	9	33.9926	22.94	7	12															0.740191	7	6.27169e+07
A0A8N7UZL1	Pyruvate carboxylase OS=Danio rerio OX=7955 GN=pcxb PE=4 SV=1 - [A0A8N7UZL1_DANRE]	30	59	621	1.81264e+10	2.5502e+10	0.710783	604.139	42	55	299	789.769	41.57	52	322	30	61	547	1.5396e+10	2.04228e+10	0.753863	520.816	40.3	49	270	530.347	44.62	57	277	0.732323	58	1.67612e+10
A0A8M1P3T0	ATP-dependent 6-phosphofructokinase OS=Danio rerio OX=7955 GN=pfklb PE=3 SV=1 - [A0A8M1P3T0_DANRE]															10	12	20	4.39337e+07	6.00768e+07	0.731291	17.7683	10.14	6	8	17.7878	16.82	11	12	0.731291	12	4.39337e+07
A0A8M1N2Q4	Phosphodiesterase OS=Danio rerio OX=7955 GN=pde6a PE=3 SV=1 - [A0A8M1N2Q4_DANRE]															3	8	13	4.42734e+07	6.07534e+07	0.728739	7.65181	7.11	7	7	8.51125	7.11	6	6	0.728739	8	4.42734e+07
A0A8N7TAN6	Phosphodiesterase OS=Danio rerio OX=7955 GN=pde6b PE=3 SV=1 - [A0A8N7TAN6_DANRE]															3	8	12	4.42734e+07	6.07534e+07	0.728739	7.5731	5.97	6	6	12.2633	7.96	6	6	0.728739	8	4.42734e+07
A0A8M1P3R3	Pyruvate carboxylase OS=Danio rerio OX=7955 GN=pcxa PE=4 SV=1 - [A0A8M1P3R3_DANRE]	51	80	1280	2.07817e+10	3.49616e+10	0.594415	1266.16	50.8	76	597	1719.59	50.38	74	683	54	85	1282	2.02431e+10	2.35036e+10	0.861278	1138.58	50.13	68	568	1391.91	53.43	83	714	0.727847	80.5	2.05124e+10
A0A8M1QV93	Histone H2B OS=Danio rerio OX=7955 GN=si:dkey-23a13.1 PE=3 SV=1 - [A0A8M1QV93_DANRE]	6	6	12	5.84537e+07	1.79753e+08	0.325189	10.4014	26.61	3	4	16.6812	41.94	6	8	8	8	13	1.45716e+08	1.31478e+08	1.10829	10.8438	47.58	7	8	6.76301	40.32	5	5	0.716738	5.5	1.02085e+08
A0A8M1PHV5	Pre-mRNA-processing factor 6 OS=Danio rerio OX=7955 GN=prpf6 PE=4 SV=1 - [A0A8M1PHV5_DANRE]															1	1	2	1.44382e+06	2.01777e+06	0.715553	1.81812	1.23	1	1	2.28394	1.23	1	1	0.715553	1	1.44382e+06
A0A8M6Z2N7	Proton-translocating NAD(P)(+) transhydrogenase OS=Danio rerio OX=7955 GN=nnt2 PE=3 SV=1 - [A0A8M6Z2N7_DANRE]															1	1	3	6.08237e+07	8.53083e+07	0.712987	1.64217	1.03	1	1	3.44486	1.03	1	2	0.712987	1	6.08237e+07
Q7SXA1	60S ribosomal protein L26 OS=Danio rerio OX=7955 GN=rpl26 PE=2 SV=1 - [Q7SXA1_DANRE]	14	14	53	1.58376e+09	2.62455e+09	0.60344	40.4496	55.86	13	24	71.8156	55.86	13	29	17	17	55	1.0501e+09	1.27739e+09	0.822062	30.2368	54.48	13	20	52.963	64.14	15	35	0.712751	15	1.31693e+09
P62247	40S ribosomal protein S8 OS=Danio rerio OX=7955 GN=rps8 PE=2 SV=2 - [RS8_DANRE]	9	14	38	7.86302e+08	1.14761e+09	0.685164	40.0223	53.37	11	16	64.4488	52.4	13	22	9	15	47	1.02021e+09	1.38424e+09	0.737016	51.8673	51.92	12	21	55.3089	59.62	15	26	0.71109	13	9.03255e+08
A0A8M2BGP7	Heterochromatin protein 1-binding protein 3 OS=Danio rerio OX=7955 GN=hp1bp3 PE=4 SV=1 - [A0A8M2BGP7_DANRE]	4	4	8	2.73954e+07	4.02376e+07	0.68084	12.9733	7.23	4	5	8.20724	5.55	3	3	12	12	20	5.38857e+07	7.52341e+07	0.716241	22.0864	20	12	14	9.50571	9.24	5	6	0.69854	8	4.06406e+07
A0A8M1NLI6	40S ribosomal protein S8 OS=Danio rerio OX=7955 GN=rps8b PE=3 SV=1 - [A0A8M1NLI6_DANRE]	7	12	42	7.94601e+08	1.18998e+09	0.667745	44.0669	52.4	12	20	58.8895	52.4	12	22	9	15	49	1.01382e+09	1.39514e+09	0.72668	35.5498	46.15	9	16	75.3629	53.85	15	33	0.697212	13.5	9.04211e+08
A0A8M9PXB8	actin, alpha cardiac muscle 1 OS=Danio rerio OX=7955 GN=zgc:86725 PE=3 SV=1 - [A0A8M9PXB8_DANRE]															1	9	31	3.88747e+08	5.60193e+08	0.693951	29.8963	22.81	8	14	31.4462	22.81	8	17	0.693951	9	3.88747e+08
A0A8M1PI34	Methyl-CpG-binding protein 2 OS=Danio rerio OX=7955 GN=mecp2 PE=4 SV=1 - [A0A8M1PI34_DANRE]															8	8	13	1.46304e+07	2.10844e+07	0.693897	13.4763	14.12	6	6	15.6843	13.55	6	7	0.693897	8	1.46304e+07
A0A8M1RM42	Dihydropyrimidinase-related protein 2 OS=Danio rerio OX=7955 GN=dpysl2a PE=3 SV=1 - [A0A8M1RM42_DANRE]															9	9	14	2.69404e+07	3.90188e+07	0.690447	12.7838	16.58	8	8	12.1957	10.99	5	6	0.690447	9	2.69404e+07
A0A8M9P088	echinoderm microtubule-associated protein-like 1 isoform X1 OS=Danio rerio OX=7955 GN=eml1 PE=3 SV=1 - [A0A8M9P088_DANRE]															2	2	3	1.7104e+07	2.48382e+07	0.688615	3.03593	1.43	1	1	4.48487	2.98	2	2	0.688615	2	1.7104e+07
A0A8M1PFF6	60S ribosomal protein L7 OS=Danio rerio OX=7955 GN=rpl7 PE=3 SV=1 - [A0A8M1PFF6_DANRE]	6	7	13	1.01997e+08	1.229e+08	0.829912	10.2704	26.83	7	7	8.62149	20.33	5	6	7	7	14	9.14918e+07	1.68749e+08	0.542178	9.92323	24.39	6	6	10.2791	25.2	6	8	0.686045	7	9.67442e+07
Q6Q415	60S ribosomal protein L36 OS=Danio rerio OX=7955 GN=rpl36 PE=3 SV=1 - [RL36_DANRE]	7	7	20	6.72172e+08	1.01235e+09	0.663975	16.0475	37.14	6	9	23.3295	43.81	6	11	6	6	12	3.0195e+08	4.3442e+08	0.695063	10.5266	30.48	4	6	6.83583	35.24	6	6	0.679519	6	4.87061e+08
A0A8N7T7T8	cohesin subunit SA-1 OS=Danio rerio OX=7955 GN=stag1b PE=3 SV=1 - [A0A8N7T7T8_DANRE]															1	1	2	6.62794e+07	9.76503e+07	0.678742	0	0.56	1	1	0	0.56	1	1	0.678742	1	6.62794e+07
Q6P5L3	60S ribosomal protein L19 OS=Danio rerio OX=7955 GN=rpl19 PE=2 SV=1 - [RL19_DANRE]	11	11	44	2.39053e+09	3.64864e+09	0.655185	52.5209	35.71	10	22	50.3944	27.55	9	22	8	8	46	1.86616e+09	2.70251e+09	0.690528	35.3959	31.12	7	18	56.669	31.63	8	28	0.672856	9	2.12835e+09
A0A8M9QAS2	protein mab-21-like 3 isoform X1 OS=Danio rerio OX=7955 GN=mab21l3 PE=4 SV=1 - [A0A8M9QAS2_DANRE]															4	4	5	7.99622e+06	1.19297e+07	0.670279	1.9524	3.73	1	1	6.50804	15.53	4	4	0.670279	4	7.99622e+06
A0A8M1N8J6	60S ribosomal protein L31 OS=Danio rerio OX=7955 GN=rpl31 PE=3 SV=1 - [A0A8M1N8J6_DANRE]	1	1	2	2.07911e+07	3.11259e+07	0.667965	1.77805	7.32	1	1	1.98362	7.32	1	1															0.667965	1	2.07911e+07
A0A8M3BEG6	Core histone macro-H2A OS=Danio rerio OX=7955 GN=h2afy2 PE=4 SV=1 - [A0A8M3BEG6_DANRE]	6	6	9	9.07678e+06	2.72417e+07	0.333194	3.74795	8.17	3	3	11.5005	16.89	6	6	2	2	2	6.81753e+06	6.88094e+06	0.990785	1.84285	2.45	1	1	1.91431	2.45	1	1	0.66199	2.5	7.94716e+06
A0A8M1P526	ATP synthase subunit gamma OS=Danio rerio OX=7955 GN=atp5f1c PE=3 SV=1 - [A0A8M1P526_DANRE]															10	10	18	7.47914e+07	1.13381e+08	0.659648	16.8681	23.21	8	10	11.0174	22.53	6	8	0.659648	10	7.47914e+07
Q6DRJ4	Protein KRI1 homolog OS=Danio rerio OX=7955 GN=kri1 PE=2 SV=1 - [KRI1_DANRE]	1	1	2	5.44051e+06	8.29107e+06	0.656189	2.01273	1.05	1	1	1.78192	1.05	1	1															0.656189	1	5.44051e+06
Q5RFV8	WD repeat and coiled-coil-containing protein OS=Danio rerio OX=7955 GN=wdcp PE=2 SV=2 - [WDCP_DANRE]															12	12	18	1.91353e+07	2.95672e+07	0.64718	11.6983	9.8	6	6	26.0685	18.49	11	12	0.64718	12	1.91353e+07
A0A8M9PU72	uncharacterized protein si:ch211-150i13.1 isoform X1 OS=Danio rerio OX=7955 GN=si:ch211-150i13.1 PE=4 SV=1 - [A0A8M9PU72_DANRE]															26	28	42	2.46895e+07	3.96016e+07	0.623446	21.2213	11.24	16	18	39.4797	14.53	22	24	0.623446	28	2.46895e+07
A0A8M9PYW7	uncharacterized protein LOC100331665 OS=Danio rerio OX=7955 GN=LOC100331665 PE=4 SV=1 - [A0A8M9PYW7_DANRE]	1	1	1	2.3802e+06	0		0	1.04	1	1					14	14	17	3.31765e+07	5.34557e+07	0.620636	7.13388	9.85	6	6	19.8438	16.42	11	11	0.620636	7.5	1.77784e+07
A0A8M1N7S5	heterogeneous nuclear ribonucleoprotein U OS=Danio rerio OX=7955 GN=hnrnpub PE=4 SV=1 - [A0A8M1N7S5_DANRE]															4	5	6	9.75727e+06	1.58906e+07	0.614027	4.56148	5.28	4	4	0	1.76	2	2	0.614027	5	9.75727e+06
A0A8M1P9F3	Guanylate cyclase OS=Danio rerio OX=7955 GN=gucy2d PE=3 SV=1 - [A0A8M1P9F3_DANRE]															6	6	8	5.77776e+06	9.48904e+06	0.608888	2.09805	2.46	3	3	8.40982	4.84	5	5	0.608888	6	5.77776e+06
A0A8M1N0P6	ras-related protein Rab-10 OS=Danio rerio OX=7955 GN=rab10 PE=4 SV=1 - [A0A8M1N0P6_DANRE]															2	2	2	4.86216e+06	8.03338e+06	0.605245	1.93626	5.47	1	1	2.0698	6.47	1	1	0.605245	2	4.86216e+06
Q6P0V6	60S ribosomal protein L8 OS=Danio rerio OX=7955 GN=rpl8 PE=2 SV=3 - [RL8_DANRE]	6	6	9	3.46374e+07	5.69667e+07	0.608029	14.9604	19.84	6	7	6.57078	6.23	1	2	6	6	11	5.58296e+07	9.31903e+07	0.599092	10.0049	15.95	4	5	13.9127	16.73	5	6	0.60356	6	4.52335e+07
O57521	Heat shock protein HSP 90-beta OS=Danio rerio OX=7955 GN=hsp90ab1 PE=1 SV=2 - [HS90B_DANRE]															1	2	3	7.20968e+06	1.19868e+07	0.601466	2.39992	2.9	2	2	2.11488	1.93	1	1	0.601466	2	7.20968e+06
A0A8M1PA89	guanine nucleotide-binding protein G(I) subunit alpha-2 OS=Danio rerio OX=7955 GN=gnai2b PE=4 SV=1 - [A0A8M1PA89_DANRE]	2	2	4	1.02151e+07	2.07073e+07	0.49331	3.84415	5.48	2	2	4.47824	5.48	2	2	2	2	6	2.12642e+08	3.01444e+08	0.705409	6.35387	5.48	2	3	6.24454	5.48	2	3	0.59936	2	1.11428e+08
Q90Z10	60S ribosomal protein L13 OS=Danio rerio OX=7955 GN=rpl13 PE=2 SV=3 - [RL13_DANRE]	16	16	52	1.33765e+09	1.83284e+09	0.729823	54.8877	45.97	14	27	54.5227	53.55	14	25	19	19	47	9.0282e+08	1.96996e+09	0.458294	32.7317	39.81	12	20	40.02	51.66	17	27	0.594059	16.5	1.12023e+09
A0A8M6YVB9	E3 ubiquitin-protein ligase UBR4 isoform X1 OS=Danio rerio OX=7955 GN=ubr4 PE=3 SV=1 - [A0A8M6YVB9_DANRE]															3	3	4	1.33931e+06	2.27426e+06	0.588898	1.97132	0.37	2	2	1.68004	0.38	2	2	0.588898	3	1.33931e+06
A0A8M1NZE8	Protein kinase C OS=Danio rerio OX=7955 GN=prkcaa PE=3 SV=1 - [A0A8M1NZE8_DANRE]															5	5	6	6.48825e+06	1.10683e+07	0.586201	5.98456	3.13	2	3	7.00612	5.22	3	3	0.586201	5	6.48825e+06
A0A8M1RR82	biotin--protein ligase OS=Danio rerio OX=7955 GN=hlcs PE=4 SV=1 - [A0A8M1RR82_DANRE]	1	1	2	6.29684e+06	1.08709e+07	0.579238	2.9283	2.62	1	1	2.92072	2.62	1	1															0.579238	1	6.29684e+06
Q7ZVF9	Actin, cytoplasmic 2 OS=Danio rerio OX=7955 GN=actbb PE=1 SV=2 - [ACTB2_DANRE]	7	7	12	2.26922e+07	5.07241e+07	0.447365	14.9236	16.27	6	7	14.0261	15.2	5	5	5	13	39	4.00031e+08	5.75891e+08	0.694629	34.9054	30.13	11	18	35.4845	34.93	12	21	0.570997	9.5	2.11362e+08
A0A8M9P5U9	band 4.1-like protein 3 isoform X4 OS=Danio rerio OX=7955 GN=epb41l3a PE=4 SV=1 - [A0A8M9P5U9_DANRE]	2	4	5	3.8844e+07	4.67326e+07	0.831196	11.0023	4.25	4	4	2.38952	0.85	1	1	3	8	9	5.49836e+07	1.8106e+08	0.303676	0	1.61	2	2	12.2393	5.69	7	7	0.567436	6	4.69138e+07
A0A8M1PUF2	Histone H2A OS=Danio rerio OX=7955 GN=si:ch73-368j24.15 PE=3 SV=1 - [A0A8M1PUF2_DANRE]	1	1	2	5.67113e+07	97121329	0.583923	2.11013	7.09	1	1	3.10517	7.09	1	1	1	2	4	9.28627e+07	1.72513e+08	0.538294	3.80874	12.6	2	3	2.1833	7.09	1	1	0.561108	1.5	7.4787e+07
A0A8M1N0Y0	ubiquinol-cytochrome c reductase core protein II OS=Danio rerio OX=7955 GN=uqcrc2a PE=4 SV=1 - [A0A8M1N0Y0_DANRE]															2	2	3	9.34566e+06	1.67305e+07	0.558599	0	1.74	1	1	4.81093	5.22	2	2	0.558599	2	9.34566e+06
A0A8M2BB52	40S ribosomal protein S2 OS=Danio rerio OX=7955 GN=rps2 PE=3 SV=1 - [A0A8M2BB52_DANRE]	4	4	5	2.08798e+07	2.88686e+07	0.72327	2.12917	2.5	1	1	7.21223	14.29	4	4	4	4	6	1.62038e+07	4.13726e+07	0.391655	3.21099	8.21	2	2	4.93062	13.57	4	4	0.557463	2.5	1.85418e+07
Q7ZV96	60S ribosomal protein L10 OS=Danio rerio OX=7955 GN=rpl10 PE=2 SV=1 - [RL10_DANRE]	11	11	25	1.54473e+08	3.10306e+08	0.497808	20.5851	37.21	11	12	29.957	34.42	8	13	6	6	11	7.5433e+07	1.23249e+08	0.61204	6.35742	19.07	4	5	11.171	20.47	5	6	0.554924	8.5	1.14953e+08
A0A8M9P2V3	band 4.1-like protein 2 OS=Danio rerio OX=7955 GN=wu:fi46h04 PE=4 SV=1 - [A0A8M9P2V3_DANRE]															15	18	31	8.55628e+07	1.54396e+08	0.554177	22.5446	14.9	12	13	33.67	18.33	15	18	0.554177	18	8.55628e+07
Q9PU58	Protein NipSnap homolog 2 OS=Danio rerio OX=7955 GN=nipsnap2 PE=2 SV=2 - [NIPS2_DANRE]															1	1	2	5.32452e+06	9.60998e+06	0.554061	2.09593	2.8	1	1	2.16271	2.8	1	1	0.554061	1	5.32452e+06
A0A8M1PQQ4	ADP/ATP translocase OS=Danio rerio OX=7955 GN=slc25a4 PE=3 SV=1 - [A0A8M1PQQ4_DANRE]	4	4	5	2.41138e+07	4.12185e+07	0.585023	3.80046	5.7	2	2	6.51879	9.4	3	3	10	10	23	2.54453e+08	4.9127e+08	0.517949	14.2696	26.85	8	9	26.7187	29.53	10	14	0.551486	6	1.39283e+08
A0A8M1PIK4	Succinate--CoA ligase [ADP-forming] subunit beta, mitochondrial OS=Danio rerio OX=7955 GN=sucla2 PE=3 SV=1 - [A0A8M1PIK4_DANRE]															3	3	3	6.15036e+06	1.12722e+07	0.545623	2.06578	2.15	1	1	1.93053	5.15	2	2	0.545623	3	6.15036e+06
A0A8M3ART2	IQ motif and SEC7 domain-containing protein 3 isoform X2 OS=Danio rerio OX=7955 GN=iqsec3a PE=3 SV=1 - [A0A8M3ART2_DANRE]															2	6	9	8.68923e+06	1.6107e+07	0.53947	6.89111	3.89	5	5	2.40329	1.87	3	4	0.53947	6	8.68923e+06
A0A8M1PAN1	Elongation factor 1-alpha OS=Danio rerio OX=7955 GN=eef1a1a PE=3 SV=1 - [A0A8M1PAN1_DANRE]															4	4	7	2.76816e+07	5.18591e+07	0.533785	8.14718	8.66	4	5	3.43507	4.55	2	2	0.533785	4	2.76816e+07
P35359	Rhodopsin OS=Danio rerio OX=7955 GN=rho PE=1 SV=2 - [OPSD_DANRE]	4	4	8	2.37006e+07	3.82046e+07	0.620359	8.77461	14.12	4	4	13.2154	12.43	3	4	6	6	18	1.62577e+08	3.72862e+08	0.436023	17.4015	18.93	5	8	29.064	19.49	5	10	0.528191	5	9.31386e+07
Q90474	Heat shock protein HSP 90-alpha 1 OS=Danio rerio OX=7955 GN=hsp90a.1 PE=1 SV=3 - [H90A1_DANRE]															2	3	5	5.09982e+06	9.676e+06	0.527059	5.27213	4.97	3	3	2.11488	2.9	2	2	0.527059	3	5.09982e+06
F1R2X6	Proteasome activator complex subunit 4B OS=Danio rerio OX=7955 GN=psme4b PE=3 SV=2 - [PSM4B_DANRE]															5	5	8	4.16843e+06	7.95922e+06	0.523724	4.17266	1.59	3	3	6.3833	2.79	5	5	0.523724	5	4.16843e+06
A0A8M1PD92	Tubulin alpha chain OS=Danio rerio OX=7955 GN=tuba8l2 PE=3 SV=1 - [A0A8M1PD92_DANRE]															2	11	38	3.88603e+08	7.43957e+08	0.522346	45.9144	23.16	8	19	48.3473	28.51	9	19	0.522346	11	3.88603e+08
A0A8M2B6D3	probable histone-lysine N-methyltransferase ASH1L isoform X1 OS=Danio rerio OX=7955 GN=ash1l PE=4 SV=1 - [A0A8M2B6D3_DANRE]	16	16	22	1.19307e+07	2.53579e+07	0.470494	26.8526	4.59	12	12	23.9336	3.68	10	10	13	13	19	7.3508e+06	1.2819e+07	0.573429	11.1091	2.01	6	7	25.9489	4.22	11	12	0.521961	12.5	9.64077e+06
A0A8M1P7X5	Tubulin beta chain OS=Danio rerio OX=7955 GN=tubb1 PE=3 SV=1 - [A0A8M1P7X5_DANRE]															1	7	27	3.90237e+08	7.73346e+08	0.504609	18.0606	11.37	6	14	18.3663	11.37	7	13	0.504609	7	3.90237e+08
P61485	60S ribosomal protein L36a OS=Danio rerio OX=7955 GN=rpl36a PE=3 SV=2 - [RL36A_DANRE]	5	5	10	1.41551e+08	2.03835e+08	0.694439	12.1259	27.36	4	6	9.47348	19.81	4	4	5	5	9	5.9725e+07	1.91499e+08	0.311881	4.0914	16.04	2	2	14.4357	31.13	5	7	0.50316	4.5	1.00638e+08
A0A8M1NER1	Tubulin alpha chain OS=Danio rerio OX=7955 GN=tuba1c PE=3 SV=1 - [A0A8M1NER1_DANRE]															1	15	65	6.16293e+08	1.23043e+09	0.500876	72.0811	34.81	13	31	81.5941	37.25	14	34	0.500876	15	6.16293e+08
A0A8M1P8U9	Tubulin alpha chain OS=Danio rerio OX=7955 GN=si:ch211-114n24.6 PE=3 SV=1 - [A0A8M1P8U9_DANRE]															2	14	59	6.16293e+08	1.23043e+09	0.500876	61.0177	32.59	12	26	78.5431	36.81	13	33	0.500876	14	6.16293e+08
Q8JHJ1	60S ribosomal protein L35 OS=Danio rerio OX=7955 GN=rpl35 PE=2 SV=3 - [RL35_DANRE]	10	10	47	1.06003e+09	2.02209e+09	0.524228	30.483	38.21	8	22	38.4371	38.21	10	25	8	8	35	6.38076e+08	1.34983e+09	0.472708	18.556	37.4	7	11	28.7475	37.4	7	24	0.498468	8	8.49055e+08
A0A8M1NFV6	60S ribosomal protein L37a OS=Danio rerio OX=7955 GN=zgc:171772 PE=3 SV=1 - [A0A8M1NFV6_DANRE]	7	7	43	8.49575e+08	1.20677e+09	0.704008	35.8731	59.78	6	17	70.4543	67.39	7	26	5	5	13	6.72509e+07	2.3385e+08	0.287581	12.2099	51.09	4	6	10.2373	58.7	5	7	0.495794	5.5	4.58413e+08
A0A8M1PEG3	Tubulin alpha chain OS=Danio rerio OX=7955 GN=tuba2 PE=3 SV=1 - [A0A8M1PEG3_DANRE]															3	15	50	4.19136e+08	8.51514e+08	0.492224	59.0742	29.71	11	23	68.6433	36.36	13	27	0.492224	15	4.19136e+08
Q6PBY1	40S ribosomal protein S3a OS=Danio rerio OX=7955 GN=rps3a PE=2 SV=3 - [RS3A_DANRE]	3	3	4	4.1079e+06	1.07334e+07	0.382723	2.09939	2.62	1	1	5.24692	7.12	2	3	8	8	15	1.91641e+07	3.18761e+07	0.601204	9.77474	19.48	6	7	10.9943	25.09	8	8	0.491963	4.5	1.1636e+07
A0A8M1N5M5	Tubulin beta chain OS=Danio rerio OX=7955 GN=tubb6 PE=3 SV=1 - [A0A8M1N5M5_DANRE]															1	9	30	4.38619e+08	8.97123e+08	0.488918	21.6295	14.99	7	14	28.7218	17.67	9	16	0.488918	9	4.38619e+08
A0A0R4ITC5	Transformation/transcription domain-associated protein OS=Danio rerio OX=7955 GN=trrap PE=3 SV=1 - [TRRAP_DANRE]	1	2	3	5.57649e+07	1.15628e+08	0.482279	2.52415	0.6	2	2	0	0.16	1	1															0.482279	2	5.57649e+07
A0A8M2BBW5	Phosphate carrier protein, mitochondrial OS=Danio rerio OX=7955 GN=slc25a3a PE=3 SV=1 - [A0A8M2BBW5_DANRE]															10	10	20	5.19681e+07	1.08463e+08	0.479133	21.1973	18.3	6	9	21.1384	22.81	9	11	0.479133	10	5.19681e+07
A0A8M1MZT1	60S ribosomal protein L39 OS=Danio rerio OX=7955 GN=rpl39 PE=3 SV=1 - [A0A8M1MZT1_DANRE]															1	1	2	4.10274e+07	8.57795e+07	0.478289	2.09936	19.61	1	1	0	19.61	1	1	0.478289	1	4.10274e+07
A0A8N7T8D0	synaptic vesicle glycoprotein 2A OS=Danio rerio OX=7955 GN=sv2a PE=3 SV=1 - [A0A8N7T8D0_DANRE]															1	1	2	1.33471e+07	2.79297e+07	0.477883	1.91174	1.5	1	1	2.09688	1.5	1	1	0.477883	1	1.33471e+07
Q6DRP2	Guanine nucleotide-binding protein-like 3 OS=Danio rerio OX=7955 GN=gnl3 PE=2 SV=1 - [GNL3_DANRE]	8	8	13	1.68968e+07	3.82231e+07	0.442056	12.446	13.19	6	6	20.8617	13.55	6	7	13	13	24	3.63056e+07	7.18192e+07	0.505514	18.8563	15.69	9	10	28.6844	25.31	12	14	0.473785	9.5	2.66012e+07
A0A8M2BJT5	Oxoglutarate dehydrogenase (succinyl-transferring) OS=Danio rerio OX=7955 GN=ogdha PE=3 SV=1 - [A0A8M2BJT5_DANRE]															5	5	6	3.84753e+06	8.20556e+06	0.468892	4.43165	3.42	3	3	4.33312	3.42	3	3	0.468892	5	3.84753e+06
A0A8M9PJ56	dynamin-2 OS=Danio rerio OX=7955 GN=dnm3b PE=3 SV=1 - [A0A8M9PJ56_DANRE]															5	6	6	5.39466e+06	1.15162e+07	0.46844	7.15567	6.83	3	3	5.62512	6.09	3	3	0.46844	6	5.39466e+06
A0A8M1NBR4	ATP synthase subunit alpha OS=Danio rerio OX=7955 GN=atp5fa1 PE=3 SV=1 - [A0A8M1NBR4_DANRE]	3	3	4	6.10918e+06	1.47628e+07	0.413822	0	1.27	1	1	5.97605	4.9	3	3	24	24	37	8.3398e+07	1.63007e+08	0.511621	20.6671	26.68	16	16	37.1484	32.3	17	21	0.462721	12.5	4.47536e+07
A0A8M1PZE1	Myelin basic protein OS=Danio rerio OX=7955 GN=mbpa PE=3 SV=1 - [A0A8M1PZE1_DANRE]	13	13	108	2.41861e+09	7.88951e+09	0.30656	68.8016	50.36	10	39	147.115	56.93	12	69	12	12	95	2.31758e+09	3.75028e+09	0.617977	45.666	48.18	9	39	75.733	57.66	11	56	0.462269	11	2.3681e+09
A0A8M3B3F1	Protein 4.1 OS=Danio rerio OX=7955 GN=epb41a PE=4 SV=1 - [A0A8M3B3F1_DANRE]	14	16	25	4.85675e+07	7.15671e+07	0.678628	24.5616	18.36	11	11	32.5714	18.36	12	14	10	14	17	1.92682e+07	78473675	0.245538	4.53505	2.24	1	2	26.3189	23.73	14	15	0.462083	12.5	3.39178e+07
A0A8M1N7Z8	Tubulin beta chain OS=Danio rerio OX=7955 GN=tubb2b PE=3 SV=1 - [A0A8M1N7Z8_DANRE]	8	8	12	2.66249e+07	5.95881e+07	0.446817	9.64345	8.9	4	4	21.3545	18.43	7	8	14	21	97	5.98448e+08	1.27005e+09	0.471199	83.362	36.23	16	40	119.987	43.43	21	57	0.459008	12.5	3.12536e+08
A0A8M2BGN3	IQ motif and SEC7 domain-containing protein 1 isoform X1 OS=Danio rerio OX=7955 GN=iqsec1b PE=3 SV=1 - [A0A8M2BGN3_DANRE]															2	4	6	7.3282e+06	1.6107e+07	0.45497	3.96418	2.48	3	3	2.40329	1.44	2	3	0.45497	4	7.3282e+06
Q6PC14	60S ribosomal protein L23 OS=Danio rerio OX=7955 GN=rpl23 PE=2 SV=1 - [RL23_DANRE]	1	1	1	0	2.94057e+06	0					0	5.71	1	1	4	4	5	1.44048e+07	1.58466e+07	0.909013	0	5.71	1	1	10.9953	32.86	3	4	0.454507	4	7.20238e+06
A0A8M1RI39	H(+)-transporting two-sector ATPase OS=Danio rerio OX=7955 GN=atp6v1ab PE=3 SV=1 - [A0A8M1RI39_DANRE]															1	1	2	1.67518e+06	3.88862e+06	0.43079	3.04295	2.76	1	1	2.18549	2.76	1	1	0.43079	1	1.67518e+06
A0A8M3B025	kinesin-like protein KIF1C isoform X1 OS=Danio rerio OX=7955 GN=kif1c PE=3 SV=1 - [A0A8M3B025_DANRE]															2	2	4	1.69753e+06	4.00105e+06	0.424271	4.07434	2.03	2	2	4.38016	2.03	2	2	0.424271	2	1.69753e+06
A0A8N7T8Q4	cGMP-gated cation channel alpha-1 OS=Danio rerio OX=7955 GN=cnga1 PE=4 SV=1 - [A0A8N7T8Q4_DANRE]	2	4	7	2.68642e+07	4.66035e+07	0.576442	4.49091	5.16	3	3	9.59032	6.73	4	4	7	11	15	2.37557e+07	9.42399e+07	0.252077	6.13944	6.26	4	4	14.2007	16.12	11	11	0.41426	7	2.531e+07
A0A8M2BAK4	phosphatidylinositol 5-phosphate 4-kinase type-2 alpha isoform X1 OS=Danio rerio OX=7955 GN=pip4k2ab PE=4 SV=1 - [A0A8M2BAK4_DANRE]	1	1	1	0	7.97351e+06	0					0	3.82	1	1	11	11	19	3.77621e+07	4.56007e+07	0.828103	20.0224	20.9	7	8	17.7543	21.8	9	11	0.414051	11	1.8881e+07
A0A8M1P1Z0	Creatine kinase OS=Danio rerio OX=7955 GN=ckmt2a PE=3 SV=1 - [A0A8M1P1Z0_DANRE]	1	1	1	0	0						2.71946	3.36	1	1	4	4	8	7.23121e+06	1.76202e+07	0.410394	11.7713	10.07	4	5	6.52274	7.91	3	3	0.410394	4	3.61561e+06
Q7ZWJ4	60S ribosomal protein L18a OS=Danio rerio OX=7955 GN=rpl18a PE=2 SV=1 - [RL18A_DANRE]	8	8	14	5.10101e+07	1.84635e+08	0.276276	8.87406	30.68	5	5	19.4117	43.75	8	9	10	10	23	2.08932e+08	4.02992e+08	0.518452	21.6421	39.77	8	13	19.7756	27.84	6	10	0.397364	7.5	1.29971e+08
A0A8M1NTF4	uncharacterized protein LOC100001558 OS=Danio rerio OX=7955 GN=cnga1a PE=4 SV=1 - [A0A8M1NTF4_DANRE]	1	3	5	2.44292e+07	5.07666e+07	0.481206	4.78684	3.16	3	3	4.40496	2.73	2	2	3	7	9	1.68912e+07	5.53755e+07	0.30503	0	1.15	1	1	5.77173	8.46	7	8	0.393118	5	2.06602e+07
Q9W6A5	Green-sensitive opsin-1 OS=Danio rerio OX=7955 GN=opn1mw1 PE=1 SV=2 - [OPSG1_DANRE]															1	5	10	2.86726e+07	7.33391e+07	0.390959	13.6699	16.05	4	5	14.0731	15.76	4	5	0.390959	5	2.86726e+07
Q90257	ES1 protein, mitochondrial OS=Danio rerio OX=7955 GN=es1 PE=1 SV=2 - [ES1_DANRE]	3	3	4	3.56958e+07	5.95934e+07	0.598989	2.3714	5.56	1	1	7.25807	14.44	3	3	10	10	12	1.85682e+07	1.02582e+08	0.181008	4.58915	12.22	3	3	21.4731	36.3	9	9	0.389999	5.5	2.7132e+07
A0A8M1QHA2	carboxyl-terminal PDZ ligand of neuronal nitric oxide synthase protein isoform X1 OS=Danio rerio OX=7955 GN=si:dkey-34e4.1 PE=4 SV=1 - [A0A8M1QHA2_DANRE]															6	6	7	4.79431e+06	1.24149e+07	0.386174	2.44349	5.57	3	3	3.59924	7.17	4	4	0.386174	6	4.79431e+06
A0A8M3AXX0	ERC protein 2 isoform X1 OS=Danio rerio OX=7955 GN=erc2 PE=4 SV=1 - [A0A8M3AXX0_DANRE]	1	1	1	0	2.06737e+06	0					2.32174	0.97	1	1	20	20	26	2.07027e+07	2.68573e+07	0.770844	22.8248	12.82	14	14	26.7638	10.26	11	12	0.385422	20	1.03514e+07
A0A8M3B4R7	Delta-1-pyrroline-5-carboxylate synthase OS=Danio rerio OX=7955 GN=aldh18a1 PE=3 SV=1 - [A0A8M3B4R7_DANRE]															1	1	2	1.20297e+06	3249409	0.370212	2.15231	0.99	1	1	2.08155	0.99	1	1	0.370212	1	1.20297e+06
A0A8M2B7J3	zinc finger protein 728 OS=Danio rerio OX=7955 GN=znf770 PE=4 SV=1 - [A0A8M2B7J3_DANRE]															3	3	3	2.36496e+06	6736809	0.351051	0	0.91	1	1	3.22375	2.07	2	2	0.351051	3	2.36496e+06
A0A8M2B2W1	DNA-directed RNA polymerase subunit OS=Danio rerio OX=7955 GN=polr2a PE=3 SV=1 - [A0A8M2B2W1_DANRE]															4	4	4	2.05765e+06	6.85658e+06	0.300099	2.25666	1.27	2	2	2.52479	1.27	2	2	0.300099	4	2.05765e+06
Q9PVK4	L-lactate dehydrogenase B-A chain OS=Danio rerio OX=7955 GN=ldhba PE=2 SV=4 - [LDHBA_DANRE]															2	2	3	1.92488e+06	6.4288e+06	0.299416	4.54497	8.68	2	2	2.37236	4.19	1	1	0.299416	2	1.92488e+06
A0A8M3AJ63	meckelin isoform X1 OS=Danio rerio OX=7955 GN=tmem67 PE=4 SV=1 - [A0A8M3AJ63_DANRE]															1	1	2	5.29244e+08	1.77055e+09	0.298915	0	0.69	1	1	0	0.69	1	1	0.298915	1	5.29244e+08
A0A8M3AN15	round spermatid basic protein 1-like isoform X1 OS=Danio rerio OX=7955 GN=LOC100330644 PE=3 SV=1 - [A0A8M3AN15_DANRE]															9	9	12	9.36901e+06	3.14664e+07	0.297746	4.19474	4.54	3	3	14.4952	9.96	8	9	0.297746	9	9.36901e+06
A0A8M1NBR1	SWI/SNF-related matrix-associated actin-dependent regulator of chromatin subfamily A member 5 OS=Danio rerio OX=7955 GN=smarca5 PE=3 SV=1 - [A0A8M1NBR1_DANRE]	2	2	2	0	1.33665e+06	0	2.15835	1.06	1	1	2.71114	1.35	1	1	15	15	19	1.21174e+07	2.09974e+07	0.577089	12.3011	6.38	6	6	18.791	11.01	12	13	0.288544	8	6.05869e+06
A0A8M1N2F7	nucleolar transcription factor 1 OS=Danio rerio OX=7955 GN=ubtf PE=4 SV=1 - [A0A8M1N2F7_DANRE]	2	2	3	4.11531e+06	7.20987e+06	0.570789	2.25573	1.63	1	1	5.02533	2.99	2	2	3	3	4	0	2.49783e+06	0	2.23291	1.63	1	1	7.37408	5.31	3	3	0.285394	2	2.05766e+06
Q642H9	40S ribosomal protein S4, X isoform OS=Danio rerio OX=7955 GN=rps4x PE=2 SV=3 - [RS4X_DANRE]	1	1	1	0	1.12176e+07	0					1.6966	3.42	1	1	6	6	9	2.03633e+07	3.57359e+07	0.569828	6.91837	26.24	6	6	3.5728	11.41	3	3	0.284914	6	1.01817e+07
A0A8M1NFY8	aurora kinase A-interacting protein OS=Danio rerio OX=7955 GN=aurkaip1 PE=4 SV=1 - [A0A8M1NFY8_DANRE]	3	3	5	9.07648e+06	1.60549e+07	0.56534	4.07125	8.13	2	2	6.57985	8.13	3	3	3	3	4	0	8.94158e+06	0					7.98626	8.13	3	4	0.28267	2.5	4.53824e+06
A0A8M9QB40	actin-binding LIM protein 3 isoform X1 OS=Danio rerio OX=7955 GN=ablim3 PE=4 SV=1 - [A0A8M9QB40_DANRE]															3	3	3	1.53621e+06	5.77566e+06	0.265979	2.05224	1.3	1	1	4.03273	3.77	2	2	0.265979	3	1.53621e+06
Q8AYM8	Green-sensitive opsin-2 OS=Danio rerio OX=7955 GN=opn1mw2 PE=1 SV=1 - [OPSG2_DANRE]	1	1	3	526388	6.96381e+06	0.075589	0	4.3	1	1	5.86239	4.3	1	2	2	6	13	3.92452e+07	8.84208e+07	0.443846	19.629	20.92	5	7	18.5796	20.63	5	6	0.259718	3.5	1.98858e+07
Q7SYK7	Aspartate aminotransferase, mitochondrial OS=Danio rerio OX=7955 GN=got2a PE=2 SV=1 - [AATM_DANRE]															3	3	3	3.12879e+06	1.30484e+07	0.239784	3.72091	3.97	2	2	0	3.27	1	1	0.239784	3	3.12879e+06
Q7SY23	Delta-1-pyrroline-5-carboxylate dehydrogenase, mitochondrial OS=Danio rerio OX=7955 GN=aldh4a1 PE=2 SV=1 - [AL4A1_DANRE]															3	3	4	3.49369e+06	1.4718e+07	0.237376	4.25596	4.68	2	2	2.73065	3.78	2	2	0.237376	3	3.49369e+06
A0A8M1N5J0	ubiquitin-like protein fubi and ribosomal protein S30 OS=Danio rerio OX=7955 GN=faub PE=4 SV=1 - [A0A8M1N5J0_DANRE]															3	3	6	4.73636e+07	2.20713e+08	0.214594	2.72984	8.27	2	2	7.6885	9.02	3	4	0.214594	3	4.73636e+07
A0A8M1PEP2	Pyruvate dehydrogenase E1 component subunit beta OS=Danio rerio OX=7955 GN=pdhb PE=4 SV=1 - [A0A8M1PEP2_DANRE]															4	4	4	2.72824e+06	1.29993e+07	0.209876	2.576	4.46	1	1	6.80878	10.86	3	3	0.209876	4	2.72824e+06
A0A8M2BCV1	Dynamin GTPase OS=Danio rerio OX=7955 GN=dnm1b PE=3 SV=1 - [A0A8M2BCV1_DANRE]															4	5	5	2.59408e+06	1.28395e+07	0.202039	2.00377	2.56	2	2	4.52011	4.07	3	3	0.202039	5	2.59408e+06
A0A8N7UVH3	potassium voltage-gated channel subfamily B member 2 OS=Danio rerio OX=7955 GN=si:dkey-192j17.1 PE=4 SV=1 - [A0A8N7UVH3_DANRE]	2	2	2	1.11121e+07	5.56112e+07	0.199818	1.88817	1.08	1	1	2.29291	1.32	1	1															0.199818	1	1.11121e+07
A0A8M9PXD6	Glutamate receptor OS=Danio rerio OX=7955 GN=grin2aa PE=3 SV=1 - [A0A8M9PXD6_DANRE]															2	2	2	1.93226e+06	9.7728e+06	0.197718	2.28318	0.96	1	1	2.81335	0.89	1	1	0.197718	2	1.93226e+06
Q6PH57	Guanine nucleotide-binding protein G(I)/G(S)/G(T) subunit beta-1 OS=Danio rerio OX=7955 GN=gnb1 PE=2 SV=1 - [GBB1_DANRE]															2	2	2	1.44196e+06	7.49868e+06	0.192296	2.39112	3.82	1	1	1.81425	3.53	1	1	0.192296	2	1.44196e+06
A0A8N7TBM6	cyclic nucleotide-gated cation channel beta-1 isoform X1 OS=Danio rerio OX=7955 GN=cngb1a PE=4 SV=1 - [A0A8N7TBM6_DANRE]															5	6	9	2.97936e+06	2.60124e+07	0.114536	6.35524	2.64	3	3	7.8866	4.75	6	6	0.114536	6	2.97936e+06
A0A8M1RN59	Diacylglycerol kinase OS=Danio rerio OX=7955 GN=dgkzb PE=3 SV=1 - [A0A8M1RN59_DANRE]															3	3	4	633465	8.64524e+06	0.0732733	4.48838	2.08	2	2	2.05287	2	2	2	0.0732733	3	633465
A0A8M9PRW1	armadillo repeat-containing protein 5 OS=Danio rerio OX=7955 GN=armc5 PE=4 SV=1 - [A0A8M9PRW1_DANRE]	1	1	5	4.58849e+07	0		0	0.66	1	3	1.62803	0.66	1	2	1	1	3	1.03889e+06	94265692433	1.10209e-05	0	0.66	1	1	0	0.66	1	2	1.10209e-05	1	2.34619e+07
A0A8M1N3I0	CD2-associated protein OS=Danio rerio OX=7955 GN=cd2ap PE=4 SV=1 - [A0A8M1N3I0_DANRE]	1	1	1	0	467585	0					0	1.67	1	1															0	#DIV/0!	0
A0A8M1N5Y3	Activator of basal transcription 1 OS=Danio rerio OX=7955 GN=abt1 PE=3 SV=1 - [A0A8M1N5Y3_DANRE]	1	1	1	0	5.5711e+06	0					1.69501	3.61	1	1															0	#DIV/0!	0
A0A8M1N9J5	Sodium channel protein OS=Danio rerio OX=7955 GN=scn1lab PE=3 SV=1 - [A0A8M1N9J5_DANRE]	1	1	1	0	6.8042e+06	0					2.89028	0.8	1	1															0	#DIV/0!	0
A0A8M1NCQ8	protein RRP5 homolog OS=Danio rerio OX=7955 GN=pdcd11 PE=4 SV=1 - [A0A8M1NCQ8_DANRE]	1	1	1	0	2.26227e+07	0					2.01104	0.44	1	1															0	#DIV/0!	0
A0A8M1NE19	ADP-ribosylation factor-like 15a OS=Danio rerio OX=7955 GN=arl15a PE=4 SV=1 - [A0A8M1NE19_DANRE]	1	1	1	0	1.91732e+08	0					1.67266	2.91	1	1															0	#DIV/0!	0
A0A8M1NIZ6	FRAS1-related extracellular matrix protein 3 precursor OS=Danio rerio OX=7955 GN=frem3 PE=3 SV=1 - [A0A8M1NIZ6_DANRE]	1	1	1	0	8.13705e+06	0					2.44096	0.48	1	1															0	#DIV/0!	0
A0A8M1NUQ4	Nucleolar protein 6 OS=Danio rerio OX=7955 GN=nol6 PE=3 SV=1 - [A0A8M1NUQ4_DANRE]	1	1	1	0	125086368	0					0	0.69	1	1															0	#DIV/0!	0
A0A8M1PFY9	HEAT repeat-containing protein 3 OS=Danio rerio OX=7955 GN=heatr3 PE=4 SV=1 - [A0A8M1PFY9_DANRE]	1	1	1	0	76464095	0					2.64675	2.2	1	1															0	#DIV/0!	0
A0A8M1Q7U8	B2 bradykinin receptor OS=Danio rerio OX=7955 GN=si:dkey-63b1.1 PE=3 SV=1 - [A0A8M1Q7U8_DANRE]	1	1	1	0	1.7318e+07	0					0	1.93	1	1															0	#DIV/0!	0
A0A8M1QH70	DENN domain-containing protein 2C OS=Danio rerio OX=7955 GN=dennd2c PE=4 SV=1 - [A0A8M1QH70_DANRE]	1	1	1	0	9.848e+08	0					2.87042	1.96	1	1															0	#DIV/0!	0
A0A8M1REI6	ATP-dependent Clp protease ATP-binding subunit clpX-like, mitochondrial OS=Danio rerio OX=7955 GN=clpxb PE=4 SV=1 - [A0A8M1REI6_DANRE]	1	1	1	0	2338644288	0					1.9728	1.94	1	1															0	#DIV/0!	0
A0A8M1RHL0	Protein kinase C OS=Danio rerio OX=7955 GN=prkceb PE=3 SV=1 - [A0A8M1RHL0_DANRE]	1	1	1	0	1.21182e+08	0					2.12608	0.95	1	1															0	#DIV/0!	0
A0A8M1RI45	dynein heavy chain 5, axonemal OS=Danio rerio OX=7955 GN=dnah5l PE=3 SV=1 - [A0A8M1RI45_DANRE]	1	1	1	0	4.52532e+09	0					2.03679	0.28	1	1															0	#DIV/0!	0
A0A8M1RJ57	uncharacterized protein nacad isoform X1 OS=Danio rerio OX=7955 GN=nacad PE=4 SV=1 - [A0A8M1RJ57_DANRE]	1	1	1	0	1.48969e+08	0					2.73123	0.91	1	1															0	#DIV/0!	0
A0A8M1RML1	proteinase-activated receptor 3-like OS=Danio rerio OX=7955 GN=LOC100333265 PE=4 SV=1 - [A0A8M1RML1_DANRE]	1	1	1	0	1.14142e+06	0					0	2.39	1	1															0	#DIV/0!	0
A0A8M2B1Q9	mitogen-activated protein kinase kinase kinase 1 OS=Danio rerio OX=7955 GN=map3k1 PE=4 SV=1 - [A0A8M2B1Q9_DANRE]	1	1	1	0	2.68907e+06	0					1.8353	0.61	1	1															0	#DIV/0!	0
A0A8M2B1V7	6-phosphofructo-2-kinase/fructose-2, 6-bisphosphatase 2 isoform X1 OS=Danio rerio OX=7955 GN=pfkfb2b PE=3 SV=1 - [A0A8M2B1V7_DANRE]	1	1	1	0	9.37545e+07	0					2.15947	2.68	1	1															0	#DIV/0!	0
A0A8M2B3N5	Non-specific serine/threonine protein kinase OS=Danio rerio OX=7955 GN=slka PE=4 SV=1 - [A0A8M2B3N5_DANRE]	1	1	1	0	4.52817e+08	0					2.06602	0.89	1	1															0	#DIV/0!	0
A0A8M2B4T9	inhibitor of Bruton tyrosine kinase OS=Danio rerio OX=7955 GN=ibtk PE=4 SV=1 - [A0A8M2B4T9_DANRE]	1	1	1	0	5.57109e+07	0					2.32851	1.05	1	1															0	#DIV/0!	0
A0A8M2BBI4	inactive rhomboid protein 1 isoform X1 OS=Danio rerio OX=7955 GN=rhbdf1a PE=3 SV=1 - [A0A8M2BBI4_DANRE]	1	1	1	0	5.72316e+06	0					3.43326	1.9	1	1															0	#DIV/0!	0
A0A8M2BE10	Phosphodiesterase OS=Danio rerio OX=7955 GN=pde5ab PE=3 SV=1 - [A0A8M2BE10_DANRE]	1	1	1	0	1.32484e+07	0					3.16183	1.96	1	1															0	#DIV/0!	0
A0A8M3AIP2	protein furry homolog isoform X1 OS=Danio rerio OX=7955 GN=frya PE=4 SV=1 - [A0A8M3AIP2_DANRE]	1	1	1	0	3.71312e+06	0					1.94493	0.29	1	1															0	#DIV/0!	0
A0A8M3AKQ3	protein PRRC2C isoform X1 OS=Danio rerio OX=7955 GN=prrc2c PE=4 SV=1 - [A0A8M3AKQ3_DANRE]	1	1	1	0	3.54235e+08	0					1.96478	0.57	1	1															0	#DIV/0!	0
A0A8M3ANU1	dynein heavy chain 3, axonemal OS=Danio rerio OX=7955 GN=dnah3 PE=3 SV=1 - [A0A8M3ANU1_DANRE]	1	1	1	0	7.56734e+08	0					0	0.2	1	1															0	#DIV/0!	0
A0A8M3ASL5	uncharacterized protein LOC100334619 isoform X1 OS=Danio rerio OX=7955 GN=LOC100334619 PE=4 SV=1 - [A0A8M3ASL5_DANRE]	1	1	1	0	9.09303e+06	0					3.07166	4.38	1	1															0	#DIV/0!	0
A0A8M3AUI6	echinoderm microtubule-associated protein-like 5 isoform X1 OS=Danio rerio OX=7955 GN=si:dkey-1f12.3 PE=3 SV=1 - [A0A8M3AUI6_DANRE]	1	1	1	0	2.68289e+06	0					1.62296	0.35	1	1															0	#DIV/0!	0
A0A8M3AZN3	autophagy-related protein 2 homolog A isoform X1 OS=Danio rerio OX=7955 GN=si:ch73-45o6.2 PE=3 SV=1 - [A0A8M3AZN3_DANRE]	1	1	1	0	3561643	0					1.98498	0.44	1	1															0	#DIV/0!	0
A0A8M3B5M2	nebulin isoform X1 OS=Danio rerio OX=7955 GN=neb PE=4 SV=1 - [A0A8M3B5M2_DANRE]	1	1	1	0	4.68455e+07	0					1.8292	0.14	1	1															0	#DIV/0!	0
A0A8M6YTI7	GTPase IMAP family member 4-like OS=Danio rerio OX=7955 GN=LOC108179182 PE=3 SV=1 - [A0A8M6YTI7_DANRE]	1	1	1	0	3.16739e+06	0					1.83631	3.21	1	1															0	#DIV/0!	0
A0A8M6Z1P4	NACHT, LRR and PYD domains-containing protein 3-like isoform X1 OS=Danio rerio OX=7955 GN=LOC110437747 PE=4 SV=1 - [A0A8M6Z1P4_DANRE]	1	1	1	0	7.52755e+09	0					0	1.47	1	1															0	#DIV/0!	0
A0A8M9PFD6	nuclear pore complex protein Nup205 isoform X1 OS=Danio rerio OX=7955 GN=nup205 PE=3 SV=1 - [A0A8M9PFD6_DANRE]	1	1	1	0	168328906	0					3.25995	0.84	1	1															0	#DIV/0!	0
A0A8M9PHU2	leucine-rich repeat and guanylate kinase domain-containing protein isoform X1 OS=Danio rerio OX=7955 GN=lrguk PE=4 SV=1 - [A0A8M9PHU2_DANRE]	1	1	1	0	8.02324e+06	0					2.05801	1.49	1	1															0	#DIV/0!	0
A0A8M9PNF6	immunoglobulin superfamily DCC subclass member 3 isoform X1 OS=Danio rerio OX=7955 GN=LOC101882472 PE=4 SV=1 - [A0A8M9PNF6_DANRE]	1	1	1	0	6.74848e+07	0					2.60109	2.15	1	1															0	#DIV/0!	0
A0A8M9PQ11	ankyrin repeat and MYND domain-containing protein 1 OS=Danio rerio OX=7955 GN=ankmy1 PE=4 SV=1 - [A0A8M9PQ11_DANRE]	1	1	1	0	9.10903e+07	0					2.85354	1.31	1	1															0	#DIV/0!	0
A0A8M9PS85	Piezo-type mechanosensitive ion channel component OS=Danio rerio OX=7955 GN=LOC100534973 PE=3 SV=1 - [A0A8M9PS85_DANRE]	1	1	1	0	9.53216e+07	0					0	0.37	1	1															0	#DIV/0!	0
A0A8M9PT95	ribosomal RNA processing protein 1 homolog A-like OS=Danio rerio OX=7955 GN=LOC110437880 PE=3 SV=1 - [A0A8M9PT95_DANRE]	1	1	1	0	2.44678e+06	0					2.52225	2.31	1	1															0	#DIV/0!	0
A0A8M9PXS2	rho GTPase-activating protein 21-like OS=Danio rerio OX=7955 GN=LOC556095 PE=4 SV=1 - [A0A8M9PXS2_DANRE]	1	1	2	0	116252146	0					4.36461	0.99	1	2															0	#DIV/0!	0
A0A8M9QB17	transmembrane protein 131 isoform X1 OS=Danio rerio OX=7955 GN=tmem131 PE=3 SV=1 - [A0A8M9QB17_DANRE]	1	1	1	0	2.14629e+08	0					2.91033	0.72	1	1															0	#DIV/0!	0
A0A8M9QFY2	SET domain-containing protein 5 isoform X1 OS=Danio rerio OX=7955 GN=setd5 PE=4 SV=1 - [A0A8M9QFY2_DANRE]	1	1	1	0	5.16614e+06	0					1.94642	0.6	1	1															0	#DIV/0!	0
A0A8N7T5E5	Serine/threonine-protein kinase OS=Danio rerio OX=7955 GN=prkd3 PE=3 SV=1 - [A0A8N7T5E5_DANRE]	1	1	1	0	1.49457e+07	0					2.25854	1.57	1	1															0	#DIV/0!	0
A0A8N7T7A2	uncharacterized protein rab44 OS=Danio rerio OX=7955 GN=rab44 PE=4 SV=1 - [A0A8N7T7A2_DANRE]	1	1	1	0	1.39113e+07	0					2.27828	0.33	1	1															0	#DIV/0!	0
A0A8N7T7Q8	unconventional myosin-Vc OS=Danio rerio OX=7955 GN=myo5c PE=3 SV=1 - [A0A8N7T7Q8_DANRE]	1	1	1	0	7.41975e+06	0					1.75987	0.52	1	1															0	#DIV/0!	0
A0A8N7TAH7	zinc finger homeobox protein 4 isoform X1 OS=Danio rerio OX=7955 GN=zfhx4 PE=4 SV=1 - [A0A8N7TAH7_DANRE]	1	1	1	0	6.17935e+06	0					0	0.28	1	1															0	#DIV/0!	0
A0A8N7UUX7	partitioning defective 3 homolog B isoform X1 OS=Danio rerio OX=7955 GN=pard3bb PE=3 SV=1 - [A0A8N7UUX7_DANRE]	1	1	1	0	5.62767e+06	0					2.64336	1.11	1	1															0	#DIV/0!	0
A9JR78	Tonsoku-like protein OS=Danio rerio OX=7955 GN=tonsl PE=2 SV=1 - [TONSL_DANRE]	1	1	1	0	3.10832e+06	0					3.51586	1.19	1	1															0	#DIV/0!	0
F1R5H6	Bromodomain-containing protein 4 OS=Danio rerio OX=7955 GN=brd4 PE=1 SV=1 - [BRD4_DANRE]	1	1	1	0	2.08348e+08	0					2.46298	0.62	1	1															0	#DIV/0!	0
L7VG99	Transmembrane protein 132E OS=Danio rerio OX=7955 GN=tmem132e PE=2 SV=1 - [T132E_DANRE]	1	1	1	0	6.82366e+07	0					2.61426	1.03	1	1															0	#DIV/0!	0
Q6TGW5	Osteoclast-stimulating factor 1 OS=Danio rerio OX=7955 GN=ostf1 PE=2 SV=1 - [OSTF1_DANRE]	1	1	1	0	5.06068e+06	0					0	3.27	1	1															0	#DIV/0!	0
Q8AXV6	Hairy/enhancer-of-split related with YRPW motif protein 1 OS=Danio rerio OX=7955 GN=hey1 PE=2 SV=1 - [HEY1_DANRE]	1	1	3	0	3.12341e+06	0					3.64638	5.68	1	3															0	#DIV/0!	0
A0A8N7UY68	NADH dehydrogenase [ubiquinone] 1 alpha subcomplex subunit 9, mitochondrial OS=Danio rerio OX=7955 GN=ndufa9a PE=4 SV=1 - [A0A8N7UY68_DANRE]															3	3	3	0	4.56508e+06	0					7.87758	12.11	3	3	0	3	0
P79735	GTP-binding nuclear protein Ran OS=Danio rerio OX=7955 GN=ran PE=2 SV=1 - [RAN_DANRE]															3	3	3	0	2.78704e+07	0					7.03389	14.42	3	3	0	3	0
Q6DRL5	Myb-binding protein 1A-like protein OS=Danio rerio OX=7955 GN=mybbp1a PE=1 SV=1 - [MBB1A_DANRE]															3	3	3	0	2.44017e+06	0					4.60603	2.68	3	3	0	3	0
A0A8M2B6A3	zinc finger protein 865 OS=Danio rerio OX=7955 GN=znf865 PE=4 SV=1 - [A0A8M2B6A3_DANRE]	2	2	3	4.15643e+06	0		1.84119	1.26	2	3					2	2	3	0	3.15894e+06	0					4.05592	1.86	2	3	0	2	2.07821e+06
A0A8M1N1D7	60S ribosomal protein L29 OS=Danio rerio OX=7955 GN=rpl29 PE=3 SV=1 - [A0A8M1N1D7_DANRE]	1	1	1	0	3.05301e+06	0					2.36557	15.63	1	1	2	2	2	0	1.61601e+08	0					4.85742	20.31	2	2	0	2	0
A0A8M1PNU6	Malate dehydrogenase OS=Danio rerio OX=7955 GN=mdh2 PE=3 SV=1 - [A0A8M1PNU6_DANRE]															2	2	2	0	1.67869e+07	0					4.40914	6.82	2	2	0	2	0
A0A8M2BEG1	LOW QUALITY PROTEIN: 40S ribosomal protein S11 isoform X2 OS=Danio rerio OX=7955 GN=si:dkey-159f12.2 PE=3 SV=1 - [A0A8M2BEG1_DANRE]															2	2	2	0	2.17559e+07	0					0	9.27	2	2	0	2	0
A0A8M3ATD1	FERM, RhoGEF and pleckstrin domain-containing protein 2 isoform X1 OS=Danio rerio OX=7955 GN=farp2 PE=4 SV=1 - [A0A8M3ATD1_DANRE]															2	2	2	0	1.16581e+07	0					4.37867	1.81	2	2	0	2	0
A0A8M3AVF8	sterile alpha motif domain-containing protein 11 isoform X2 OS=Danio rerio OX=7955 GN=samd11 PE=4 SV=1 - [A0A8M3AVF8_DANRE]															2	2	2	0	6.53919e+06	0					4.2491	2.97	2	2	0	2	0
A0A8M6YX38	WD repeat-containing protein 7 OS=Danio rerio OX=7955 GN=wdr7 PE=4 SV=1 - [A0A8M6YX38_DANRE]															2	2	2	0	2.21698e+06	0					4.18908	1.5	2	2	0	2	0
A0A8M9PXC4	uncharacterized protein LOC103911953 OS=Danio rerio OX=7955 GN=LOC103911953 PE=4 SV=1 - [A0A8M9PXC4_DANRE]															1	2	2	0	1.44788e+07	0					4.72765	1.98	2	2	0	2	0
A0A8M9Q6K1	bromodomain adjacent to zinc finger domain protein 2B isoform X1 OS=Danio rerio OX=7955 GN=baz2ba PE=3 SV=1 - [A0A8M9Q6K1_DANRE]															2	2	2	0	2.17957e+06	0					2.263	1.08	2	2	0	2	0
A0A8M9QKG2	titin OS=Danio rerio OX=7955 GN=ttn.2 PE=3 SV=1 - [A0A8M9QKG2_DANRE]															2	2	3	0	5.27312e+06	0	2.63787	0.05	1	2	0	0.05	1	1	0	2	0
Q6DGI3	Nucleolar protein 16 OS=Danio rerio OX=7955 GN=nop16 PE=2 SV=1 - [NOP16_DANRE]															2	2	2	0	8.54801e+06	0					4.41746	14.04	2	2	0	2	0
F1QGH7	Catenin beta-1 OS=Danio rerio OX=7955 GN=ctnnb1 PE=1 SV=1 - [CTNB1_DANRE]	1	2	3	0	1.12195e+07	0	0	1.03	1	1	4.51748	2.31	2	2	2	2	2	7.4672e+06	0		0	2.31	2	2					0	1.5	3.7336e+06
A0A8M2B970	Voltage-gated potassium channel subunit beta-1 OS=Danio rerio OX=7955 GN=kcnab2b PE=3 SV=1 - [A0A8M2B970_DANRE]	1	1	1	0	3.85334e+08	0					0	1.49	1	1	1	1	1	3.27377e+08	0		0	1.49	1	1					0	1	1.63688e+08
A2BGL3	WSC domain-containing protein 2 OS=Danio rerio OX=7955 GN=wscd2 PE=3 SV=1 - [WSCD2_DANRE]	1	1	1	0	1.85813e+07	0					0	3.15	1	1	1	1	1	190326705	0		1.88575	1.22	1	1					0	1	9.51634e+07
A0A8M2BFB6	Signal transducer and activator of transcription OS=Danio rerio OX=7955 GN=stat4 PE=3 SV=1 - [A0A8M2BFB6_DANRE]	1	1	1	1.77854e+08	0		0	0.96	1	1					1	1	1	0	1.0048e+07	0					1.64418	0.96	1	1	0	1	8.8927e+07
Q66HX8	Ganglioside-induced differentiation-associated protein 2 OS=Danio rerio OX=7955 GN=gdap2 PE=2 SV=1 - [GDAP2_DANRE]	2	2	2	0	1.59344e+08	0					3.46717	1.79	2	2	1	1	1	1.58627e+08	0		0	1.59	1	1					0	1	7.93135e+07
F1QDI9	DNA helicase MCM9 OS=Danio rerio OX=7955 GN=mcm9 PE=3 SV=2 - [MCM9_DANRE]	1	1	1	5.4368e+07	0		0	0.71	1	1					1	1	1	0	4.21423e+07	0					0	0.71	1	1	0	1	2.7184e+07
A0A8M1N4M2	peroxiredoxin-1 OS=Danio rerio OX=7955 GN=prdx1 PE=3 SV=1 - [A0A8M1N4M2_DANRE]	1	1	1	0	2.27202e+06	0					3.50607	8.54	1	1	1	1	1	4.31421e+06	0		1.72412	4.02	1	1					0	1	2.1571e+06
A0A8N7TDQ0	[Histone H3]-lysine(4) N-methyltransferase OS=Danio rerio OX=7955 GN=kmt2ba PE=4 SV=1 - [A0A8N7TDQ0_DANRE]	1	1	1	3.30386e+06	0		2.60263	0.42	1	1					1	1	1	0	1.88029e+06	0					1.63872	0.56	1	1	0	1	1.65193e+06
A0A8M1PCB5	40S ribosomal protein S26 OS=Danio rerio OX=7955 GN=rps26 PE=3 SV=1 - [A0A8M1PCB5_DANRE]	1	1	1	3.02843e+06	0		0	6.09	1	1					1	1	1	0	2.02595e+07	0					0	6.09	1	1	0	1	1.51422e+06
A0A8M1N0E4	methylmalonate-semialdehyde dehydrogenase [acylating], mitochondrial OS=Danio rerio OX=7955 GN=aldh6a1 PE=3 SV=1 - [A0A8M1N0E4_DANRE]															1	1	1	0	438821	0					2.27739	2.86	1	1	0	1	0
A0A8M1N135	SNW domain-containing protein 1 OS=Danio rerio OX=7955 GN=snw1 PE=3 SV=1 - [A0A8M1N135_DANRE]															1	1	1	0	4.31246e+06	0					1.7914	1.49	1	1	0	1	0
A0A8M1N1T1	NADH dehydrogenase [ubiquinone] flavoprotein 1, mitochondrial OS=Danio rerio OX=7955 GN=ndufv1 PE=3 SV=1 - [A0A8M1N1T1_DANRE]															1	1	1	0	2.81303e+07	0					0	1.22	1	1	0	1	0
A0A8M1N529	Receptor protein-tyrosine kinase OS=Danio rerio OX=7955 GN=flt1 PE=3 SV=1 - [A0A8M1N529_DANRE]															1	1	1	0	451931	0					2.3466	0.94	1	1	0	1	0
A0A8M1N609	DNA cross-link repair 1A protein OS=Danio rerio OX=7955 GN=dclre1a PE=3 SV=1 - [A0A8M1N609_DANRE]															1	1	1	0	1.12145e+07	0					0	0.86	1	1	0	1	0
A0A8M1N612	NADH dehydrogenase [ubiquinone] iron-sulfur protein 2, mitochondrial OS=Danio rerio OX=7955 GN=ndufs2 PE=3 SV=1 - [A0A8M1N612_DANRE]															1	1	1	0	7.12366e+06	0					1.6258	1.72	1	1	0	1	0
A0A8M1N6S0	DNA-directed RNA polymerase subunit beta OS=Danio rerio OX=7955 GN=polr2b PE=3 SV=1 - [A0A8M1N6S0_DANRE]															1	1	1	0	3.27863e+06	0					1.74137	0.68	1	1	0	1	0
A0A8M1N6S8	Peroxiredoxin-5 OS=Danio rerio OX=7955 GN=prdx5 PE=3 SV=1 - [A0A8M1N6S8_DANRE]															1	1	1	0	3.66553e+06	0					1.67515	6.79	1	1	0	1	0
A0A8M1N8E0	solute carrier family 2, facilitated glucose transporter member 1 OS=Danio rerio OX=7955 GN=slc2a1a PE=3 SV=1 - [A0A8M1N8E0_DANRE]															1	1	1	0	2.06644e+07	0					3.26873	3.48	1	1	0	1	0
A0A8M1N925	transcription initiation factor TFIID subunit 3 OS=Danio rerio OX=7955 GN=taf3 PE=4 SV=1 - [A0A8M1N925_DANRE]															1	1	1	0	1.00182e+07	0					2.98663	1.78	1	1	0	1	0
A0A8M1NCT1	Alpha-1,6-mannosyl-glycoprotein 2-beta-N-acetylglucosaminyltransferase OS=Danio rerio OX=7955 GN=mgat2 PE=3 SV=1 - [A0A8M1NCT1_DANRE]															1	1	1	0	1.10648e+07	0					0	3.56	1	1	0	1	0
A0A8M1NF62	uncharacterized protein LOC560780 OS=Danio rerio OX=7955 GN=si:dkey-238o13.4 PE=4 SV=1 - [A0A8M1NF62_DANRE]															1	1	1	0	5.63015e+06	0					2.33461	4.12	1	1	0	1	0
A0A8M1NGM4	Activating signal cointegrator 1 complex subunit 3 OS=Danio rerio OX=7955 GN=snrnp200 PE=3 SV=1 - [A0A8M1NGM4_DANRE]															1	1	1	0	732757	0					0	0.52	1	1	0	1	0
A0A8M1NUN7	Mitogen-activated protein kinase kinase kinase OS=Danio rerio OX=7955 GN=map3k5 PE=3 SV=1 - [A0A8M1NUN7_DANRE]															1	1	1	0	7.77377e+07	0					0	0.51	1	1	0	1	0
A0A8M1NWF3	39S ribosomal protein L34, mitochondrial OS=Danio rerio OX=7955 GN=mrpl34 PE=3 SV=1 - [A0A8M1NWF3_DANRE]	1	1	1	0	4.00806e+07	0					1.85215	9.92	1	1	1	1	1	0	2.70696e+07	0					1.62382	9.92	1	1	0	1	0
A0A8M1NXM3	si:dkey-73n8.3 OS=Danio rerio OX=7955 GN=si:dkey-73n8.3 PE=3 SV=1 - [A0A8M1NXM3_DANRE]															1	1	1	0	7.64739e+06	0					0	2.7	1	1	0	1	0
A0A8M1P400	si:ch73-127m5.2 OS=Danio rerio OX=7955 GN=si:ch73-127m5.2 PE=4 SV=1 - [A0A8M1P400_DANRE]															1	1	1	0	2.83477e+07	0					2.54769	3.56	1	1	0	1	0
A0A8M1P573	D-aspartate oxidase OS=Danio rerio OX=7955 GN=zgc:172341 PE=3 SV=1 - [A0A8M1P573_DANRE]															1	1	1	0	3.65199e+07	0					1.6375	1.78	1	1	0	1	0
A0A8M1P7B4	DNA polymerase OS=Danio rerio OX=7955 GN=pola1 PE=3 SV=1 - [A0A8M1P7B4_DANRE]															1	1	1	0	1.96214e+09	0					2.34772	0.89	1	1	0	1	0
A0A8M1P8A5	uncharacterized protein LOC768176 precursor OS=Danio rerio OX=7955 GN=proza PE=4 SV=1 - [A0A8M1P8A5_DANRE]															1	1	1	0	1902528	0					2.30525	2.82	1	1	0	1	0
A0A8M1P9D7	uncharacterized protein LOC101885512 OS=Danio rerio OX=7955 GN=LOC101885512 PE=4 SV=1 - [A0A8M1P9D7_DANRE]															1	1	1	0	3.94459e+06	0					0	2.47	1	1	0	1	0
A0A8M1PCD0	nucleolar protein 56 isoform 1 OS=Danio rerio OX=7955 GN=nop56 PE=3 SV=1 - [A0A8M1PCD0_DANRE]															1	1	1	0	1.29078e+06	0					2.84949	3.47	1	1	0	1	0
A0A8M1PD40	tropomyosin alpha-3 chain isoform 1 OS=Danio rerio OX=7955 GN=tpm3 PE=3 SV=1 - [A0A8M1PD40_DANRE]															1	1	1	0	1.25689e+06	0					1.86838	2.46	1	1	0	1	0
A0A8M1PE36	Ribosome biogenesis protein NSA2 homolog OS=Danio rerio OX=7955 GN=nsa2 PE=3 SV=1 - [A0A8M1PE36_DANRE]															1	1	1	0	6.22178e+06	0					1.88524	3.46	1	1	0	1	0
A0A8M1PEX0	heterogeneous nuclear ribonucleoprotein H1 OS=Danio rerio OX=7955 GN=hnrnph1 PE=4 SV=1 - [A0A8M1PEX0_DANRE]															1	1	1	0	3.05457e+06	0					0	1.49	1	1	0	1	0
A0A8M1PHU6	zinc finger and BTB domain-containing protein 11 OS=Danio rerio OX=7955 GN=zbtb11 PE=4 SV=1 - [A0A8M1PHU6_DANRE]															1	1	1	0	1.46743e+06	0					2.4943	1.31	1	1	0	1	0
A0A8M1REB8	AMP deaminase OS=Danio rerio OX=7955 GN=ampd2a PE=3 SV=1 - [A0A8M1REB8_DANRE]															1	1	1	0	4.92005e+06	0					0	0.85	1	1	0	1	0
A0A8M1RMM2	protein POF1B OS=Danio rerio OX=7955 GN=pof1b PE=4 SV=1 - [A0A8M1RMM2_DANRE]															1	1	1	0	7.51287e+07	0					2.82392	1.86	1	1	0	1	0
A0A8M1RMT9	Protein phosphatase 1 regulatory subunit OS=Danio rerio OX=7955 GN=zmp:0000001167 PE=4 SV=1 - [A0A8M1RMT9_DANRE]															1	1	1	0	1.13138e+08	0					3.89767	2.02	1	1	0	1	0
A0A8M1RNB1	DELTA-actitoxin-Aeq1c-like OS=Danio rerio OX=7955 GN=LOC100534815 PE=3 SV=1 - [A0A8M1RNB1_DANRE]															1	1	1	0	3.65075e+06	0					0	6.21	1	1	0	1	0
A0A8M2B2V0	WASH complex subunit 2 isoform X1 OS=Danio rerio OX=7955 GN=fam21c PE=4 SV=1 - [A0A8M2B2V0_DANRE]															1	1	1	0	1.59372e+08	0					2.16551	0.94	1	1	0	1	0
A0A8M2B4I2	pre-mRNA-processing-splicing factor 8 OS=Danio rerio OX=7955 GN=prpf8 PE=4 SV=1 - [A0A8M2B4I2_DANRE]															1	1	1	0	517957	0					2.85179	0.64	1	1	0	1	0
A0A8M2B4N7	mutS protein homolog 5 OS=Danio rerio OX=7955 GN=msh5 PE=3 SV=1 - [A0A8M2B4N7_DANRE]															1	1	2	0	31469392	0					3.68052	1.84	1	2	0	1	0
A0A8M2B675	neuromedin-B isoform X1 OS=Danio rerio OX=7955 GN=nmba PE=3 SV=1 - [A0A8M2B675_DANRE]															1	1	1	0	8.0057e+07	0					1.66469	5.88	1	1	0	1	0
A0A8M2BC86	golgin subfamily B member 1 OS=Danio rerio OX=7955 GN=golgb1 PE=4 SV=1 - [A0A8M2BC86_DANRE]															1	1	1	0	4.52559e+06	0					2.19424	0.3	1	1	0	1	0
A0A8M2BDI8	nuclear receptor coactivator 5 isoform X1 OS=Danio rerio OX=7955 GN=ncoa5 PE=4 SV=1 - [A0A8M2BDI8_DANRE]															1	1	1	0	1.144e+09	0					0	1.29	1	1	0	1	0
A0A8M2BI10	protein EFR3 homolog B isoform X2 OS=Danio rerio OX=7955 GN=efr3bb PE=4 SV=1 - [A0A8M2BI10_DANRE]															1	1	1	0	196791	0					0	0.98	1	1	0	1	0
A0A8M2BIA2	FERM and PDZ domain-containing protein 1 isoform X1 OS=Danio rerio OX=7955 GN=frmpd1 PE=4 SV=1 - [A0A8M2BIA2_DANRE]															1	1	1	0	666460	0					2.04029	0.8	1	1	0	1	0
A0A8M2BII5	protein unc-13 homolog C-like isoform X1 OS=Danio rerio OX=7955 GN=LOC101884666 PE=4 SV=1 - [A0A8M2BII5_DANRE]															1	1	1	0	7.32975e+06	0					2.45879	0.6	1	1	0	1	0
A0A8M2BKX2	lysine-specific demethylase 3B isoform X1 OS=Danio rerio OX=7955 GN=kdm3b PE=4 SV=1 - [A0A8M2BKX2_DANRE]															1	1	1	0	1.00457e+07	0					2.14094	0.55	1	1	0	1	0
A0A8M3AI67	myosin heavy chain, clone 203 OS=Danio rerio OX=7955 GN=si:dkey-7i4.24 PE=4 SV=1 - [A0A8M3AI67_DANRE]															1	1	1	0	2.74182e+07	0					2.02856	4.13	1	1	0	1	0
A0A8M3AJX0	E3 ubiquitin-protein ligase OS=Danio rerio OX=7955 GN=hectd1 PE=3 SV=1 - [A0A8M3AJX0_DANRE]															1	1	1	0	1.44735e+07	0					0	0.54	1	1	0	1	0
A0A8M3AQI5	nucleosome-remodeling factor subunit BPTF isoform X1 OS=Danio rerio OX=7955 GN=bptf PE=4 SV=1 - [A0A8M3AQI5_DANRE]															1	1	1	0	1.04221e+06	0					2.26221	0.52	1	1	0	1	0
A0A8M3ARS3	WD repeat-containing protein 59 isoform X1 OS=Danio rerio OX=7955 GN=wdr59 PE=4 SV=1 - [A0A8M3ARS3_DANRE]															1	1	1	0	243185	0					2.1859	1.22	1	1	0	1	0
A0A8M3AVD6	interferon-induced very large GTPase 1 OS=Danio rerio OX=7955 GN=si:dkey-204a24.11 PE=3 SV=1 - [A0A8M3AVD6_DANRE]															1	1	1	0	2.63454e+07	0					1.78001	0.5	1	1	0	1	0
A0A8M3AWJ1	mitochondrial glutamate carrier 1 OS=Danio rerio OX=7955 GN=slc25a18 PE=3 SV=1 - [A0A8M3AWJ1_DANRE]															1	1	1	0	5.86807e+06	0					0	2.16	1	1	0	1	0
A0A8M3AZW0	kinesin-like protein KIF21B isoform X1 OS=Danio rerio OX=7955 GN=kif21a PE=3 SV=1 - [A0A8M3AZW0_DANRE]															1	1	1	0	658400	0					2.65778	0.81	1	1	0	1	0
A0A8M3B4Q1	transmembrane protein 132D OS=Danio rerio OX=7955 GN=si:dkey-1d7.3 PE=3 SV=1 - [A0A8M3B4Q1_DANRE]															1	1	1	0	3.68208e+06	0					0	1.3	1	1	0	1	0
A0A8M3B4S5	Fatty acid synthase OS=Danio rerio OX=7955 GN=fasn PE=4 SV=1 - [A0A8M3B4S5_DANRE]															1	1	1	0	1.19672e+06	0					2.46326	0.48	1	1	0	1	0
A0A8M3B6V6	liprin-alpha-4 isoform X1 OS=Danio rerio OX=7955 GN=ppfia4 PE=3 SV=1 - [A0A8M3B6V6_DANRE]															1	1	1	0	3.23627e+06	0					0	0.82	1	1	0	1	0
A0A8M6YU37	NACHT, LRR and PYD domains-containing protein 3 OS=Danio rerio OX=7955 GN=si:ch73-24k9.2 PE=4 SV=1 - [A0A8M6YU37_DANRE]															1	1	1	0	2.40124e+08	0					2.28271	1.12	1	1	0	1	0
A0A8M6YVS1	sickle tail protein homolog isoform X1 OS=Danio rerio OX=7955 GN=si:ch211-207d6.2 PE=4 SV=1 - [A0A8M6YVS1_DANRE]															1	1	1	0	2.45359e+06	0					1.83488	0.45	1	1	0	1	0
A0A8M6Z008	NLR family CARD domain-containing protein 3-like OS=Danio rerio OX=7955 GN=LOC108183675 PE=4 SV=1 - [A0A8M6Z008_DANRE]															1	1	1	0	5.34019e+08	0					2.98187	2.08	1	1	0	1	0
A0A8M6Z1S4	uncharacterized protein mslnb isoform X1 OS=Danio rerio OX=7955 GN=mslnb PE=4 SV=1 - [A0A8M6Z1S4_DANRE]	1	1	2	0	1.92636e+08	0					4.60819	0.46	1	2	1	1	1	0	5.58468e+08	0					2.96689	0.46	1	1	0	1	0
A0A8M6Z250	Signal recognition particle subunit SRP72 OS=Danio rerio OX=7955 GN=srp72 PE=3 SV=1 - [A0A8M6Z250_DANRE]															1	1	1	0	832501	0					0	1.64	1	1	0	1	0
A0A8M6Z3Z9	HAUS augmin-like complex subunit 8 OS=Danio rerio OX=7955 GN=si:ch211-153a8.4 PE=4 SV=1 - [A0A8M6Z3Z9_DANRE]															1	1	1	0	4.72431e+07	0					1.78776	1.96	1	1	0	1	0
A0A8M6Z886	Poly [ADP-ribose] polymerase OS=Danio rerio OX=7955 GN=parp4 PE=3 SV=1 - [A0A8M6Z886_DANRE]															1	1	1	0	1.26508e+07	0					2.15044	0.59	1	1	0	1	0
A0A8M9P6H5	uncharacterized protein LOC777611 isoform X1 OS=Danio rerio OX=7955 GN=zgc:153935 PE=4 SV=1 - [A0A8M9P6H5_DANRE]															1	1	1	0	1.28446e+07	0					0	1.93	1	1	0	1	0
A0A8M9P7F0	cullin-9 OS=Danio rerio OX=7955 GN=cul9 PE=3 SV=1 - [A0A8M9P7F0_DANRE]															1	1	1	0	926176	0					0	0.35	1	1	0	1	0
A0A8M9PMU9	latent-transforming growth factor beta-binding protein 4 OS=Danio rerio OX=7955 GN=LOC100333499 PE=4 SV=1 - [A0A8M9PMU9_DANRE]															1	1	1	0	3.5251e+06	0					1.81218	0.44	1	1	0	1	0
A0A8M9PPK9	protein EFR3 homolog B isoform X1 OS=Danio rerio OX=7955 GN=efr3ba PE=4 SV=1 - [A0A8M9PPK9_DANRE]															1	1	1	0	3.8765e+06	0					3.06671	1.78	1	1	0	1	0
A0A8M9PRG8	uncharacterized protein LOC101886486 OS=Danio rerio OX=7955 GN=LOC101886486 PE=4 SV=1 - [A0A8M9PRG8_DANRE]															1	1	1	0	5797888	0					1.95636	1.11	1	1	0	1	0
A0A8M9PS81	Junction plakoglobin OS=Danio rerio OX=7955 GN=jupb PE=3 SV=1 - [A0A8M9PS81_DANRE]	1	2	3	0	14672097	0	0	1.11	1	1	3.41431	2.35	2	2															0	1	0
A0A8M9PSZ2	protein furry homolog isoform X1 OS=Danio rerio OX=7955 GN=fryb PE=4 SV=1 - [A0A8M9PSZ2_DANRE]															1	1	1	0	516101	0					1.91614	0.29	1	1	0	1	0
A0A8M9PTX6	proteoglycan 4-like OS=Danio rerio OX=7955 GN=LOC100330744 PE=4 SV=1 - [A0A8M9PTX6_DANRE]															1	1	1	0	3.80289e+07	0					0	2.51	1	1	0	1	0
A0A8M9PVR3	mucin-2 OS=Danio rerio OX=7955 GN=muc2.1 PE=4 SV=1 - [A0A8M9PVR3_DANRE]															1	1	1	0	3.6742e+08	0					0	1.08	1	1	0	1	0
A0A8M9PX00	zinc finger CCCH domain-containing protein 7B OS=Danio rerio OX=7955 GN=zc3h7b PE=4 SV=1 - [A0A8M9PX00_DANRE]															1	1	1	0	1.15126e+06	0					0	1	1	1	0	1	0
A0A8M9PZL5	Methionine--tRNA ligase, mitochondrial OS=Danio rerio OX=7955 GN=mars2 PE=3 SV=1 - [A0A8M9PZL5_DANRE]															1	1	1	0	4.9906e+07	0					0	1.34	1	1	0	1	0
A0A8M9Q3C1	Transcription initiation factor TFIID subunit OS=Danio rerio OX=7955 GN=taf1 PE=3 SV=1 - [A0A8M9Q3C1_DANRE]															1	1	1	0	871075	0					3.01407	0.81	1	1	0	1	0
A0A8M9Q7F0	immunoglobulin-like and fibronectin type III domain-containing protein 1 OS=Danio rerio OX=7955 GN=igfn1.4 PE=4 SV=1 - [A0A8M9Q7F0_DANRE]															1	1	1	0	1.03077e+07	0					1.79874	0.59	1	1	0	1	0
A0A8M9Q841	trypsin-3-like OS=Danio rerio OX=7955 GN=si:dkey-33m11.7 PE=4 SV=1 - [A0A8M9Q841_DANRE]															1	1	1	0	3.44015e+07	0					1.97396	5.14	1	1	0	1	0
A0A8M9Q8E9	Beta-1,4-N-acetylgalactosaminyltransferase OS=Danio rerio OX=7955 GN=b4galnt4a PE=3 SV=1 - [A0A8M9Q8E9_DANRE]															1	1	1	0	979830	0					0	0.77	1	1	0	1	0
A0A8M9QDL2	cold shock domain-containing protein E1 isoform X1 OS=Danio rerio OX=7955 GN=csde1 PE=4 SV=1 - [A0A8M9QDL2_DANRE]															1	1	1	0	4.77152e+07	0					1.8732	1.36	1	1	0	1	0
A0A8M9QDM1	pleckstrin homology domain-containing family A member 6 isoform X1 OS=Danio rerio OX=7955 GN=plekha6 PE=4 SV=1 - [A0A8M9QDM1_DANRE]	1	1	12	0	6.08067e+08	0	13.2085	1.46	1	9	5.34241	1.46	1	3															0	1	0
A0A8M9QG78	HECT-type E3 ubiquitin transferase OS=Danio rerio OX=7955 GN=herc2 PE=4 SV=1 - [A0A8M9QG78_DANRE]															1	1	1	0	1.46387e+06	0					1.62915	0.19	1	1	0	1	0
A0A8M9QGA6	titin isoform X1 OS=Danio rerio OX=7955 GN=ttn.1 PE=3 SV=1 - [A0A8M9QGA6_DANRE]															1	1	1	0	7.53929e+06	0					2.47621	0.05	1	1	0	1	0
A0A8N7TER1	lysine-rich nucleolar protein 1 OS=Danio rerio OX=7955 GN=knop1 PE=4 SV=1 - [A0A8N7TER1_DANRE]															1	1	1	0	751620	0					2.05381	3.37	1	1	0	1	0
A0A8N7UT85	CUB and sushi domain-containing protein 2 OS=Danio rerio OX=7955 GN=csmd2 PE=4 SV=1 - [A0A8N7UT85_DANRE]															1	1	1	0	4.74408e+07	0					1.63886	0.28	1	1	0	1	0
A0A8N7UV56	cerebellin-1-like OS=Danio rerio OX=7955 GN=si:dkeyp-74b6.2 PE=4 SV=1 - [A0A8N7UV56_DANRE]															1	1	1	0	1.32118e+09	0					0	3.61	1	1	0	1	0
A0A8N7UVY5	sister chromatid cohesion protein PDS5 homolog B OS=Danio rerio OX=7955 GN=pds5b PE=4 SV=1 - [A0A8N7UVY5_DANRE]															1	1	1	0	764624	0					2.89394	1.21	1	1	0	1	0
F1QFU0	Transmembrane channel-like protein 1 OS=Danio rerio OX=7955 GN=tmc1 PE=1 SV=2 - [TMC1_DANRE]	1	1	1	0	520289	0					0	0.64	1	1	1	1	1	0	0		1.66923	0.64	1	1					0	1	0
Q1LYB6	ATPase inhibitor B, mitochondrial OS=Danio rerio OX=7955 GN=atp5if1b PE=3 SV=1 - [ATF1B_DANRE]															1	1	1	0	5.95111e+06	0					2.02293	8.41	1	1	0	1	0
Q5RHR0	Poly [ADP-ribose] polymerase 1 OS=Danio rerio OX=7955 GN=parp1 PE=2 SV=1 - [PARP1_DANRE]															1	1	2	0	2.70838e+06	0	2.29738	1.18	1	1	1.64264	1.18	1	1	0	1	0
Q6DRN3	Nucleolar complex protein 3 homolog OS=Danio rerio OX=7955 GN=noc3l PE=2 SV=1 - [NOC3L_DANRE]															1	1	1	0	2.30763e+06	0					3.00746	2	1	1	0	1	0
Q6NWG4	Protein arginine N-methyltransferase 6 OS=Danio rerio OX=7955 GN=prmt6 PE=2 SV=2 - [ANM6_DANRE]															1	1	1	0	4.19609e+06	0					2.24614	4.3	1	1	0	1	0
Q6NY74	Replication protein A 70 kDa DNA-binding subunit OS=Danio rerio OX=7955 GN=rpa1 PE=1 SV=1 - [RFA1_DANRE]															1	1	1	0	2.93745e+06	0					1.78055	1.16	1	1	0	1	0
Q6PBN2	Axin interactor, dorsalization-associated protein OS=Danio rerio OX=7955 GN=aida PE=1 SV=1 - [AIDA_DANRE]															1	1	1	0	3.26177e+06	0					0	2.64	1	1	0	1	0
Q6PI52	Calmodulin OS=Danio rerio OX=7955 GN=calm3b PE=2 SV=3 - [CALM_DANRE]															1	1	1	0	602114	0					2.46927	5.37	1	1	0	1	0
A0A8M1NHB0	SH3 and multiple ankyrin repeat domains protein 2 OS=Danio rerio OX=7955 GN=shank2b PE=3 SV=1 - [A0A8M1NHB0_DANRE]	1	1	1	0	0						1.88988	0.5	1	1															#DIV/0!	#DIV/0!	0
A0A8M1PPY8	zinc finger and BTB domain-containing protein 2 OS=Danio rerio OX=7955 GN=zbtb2b PE=4 SV=1 - [A0A8M1PPY8_DANRE]	1	1	1	0	0						1.642	1.86	1	1															#DIV/0!	#DIV/0!	0
A0A8M1PZ83	dnaJ homolog subfamily C member 5 OS=Danio rerio OX=7955 GN=dnajc5ab PE=4 SV=1 - [A0A8M1PZ83_DANRE]	1	1	1	0	0						2.58473	8.54	1	1															#DIV/0!	#DIV/0!	0
A0A8M1RHA1	uncharacterized protein KIAA1107 homolog isoform X1 OS=Danio rerio OX=7955 GN=si:ch73-389b16.2 PE=4 SV=1 - [A0A8M1RHA1_DANRE]	1	1	1	0	0						1.6156	0.51	1	1															#DIV/0!	#DIV/0!	0
A0A8M2B2I4	uncharacterized protein KIAA1958 homolog isoform X1 OS=Danio rerio OX=7955 GN=kiaa1958 PE=4 SV=1 - [A0A8M2B2I4_DANRE]	1	1	1	0	0						0	1.46	1	1															#DIV/0!	#DIV/0!	0
A0A8M2B7L6	hemicentin-1 isoform X1 OS=Danio rerio OX=7955 GN=hmcn1 PE=4 SV=1 - [A0A8M2B7L6_DANRE]	1	1	1	0	0						0	0.28	1	1															#DIV/0!	#DIV/0!	0
A0A8M2BF73	TBC1 domain family member 4 isoform X1 OS=Danio rerio OX=7955 GN=tbc1d4 PE=4 SV=1 - [A0A8M2BF73_DANRE]	1	1	2	0	0						3.25838	1.36	1	2															#DIV/0!	#DIV/0!	0
A0A8M3B2U7	Guanylate cyclase OS=Danio rerio OX=7955 GN=npr2 PE=3 SV=1 - [A0A8M3B2U7_DANRE]	1	1	1	0	0						3.74703	1.62	1	1															#DIV/0!	#DIV/0!	0
A0A8M3BDS4	uncharacterized protein si:dkey-163f14.6 isoform X1 OS=Danio rerio OX=7955 GN=si:dkey-163f14.6 PE=4 SV=1 - [A0A8M3BDS4_DANRE]	1	1	1	0	0						3.27522	2.3	1	1															#DIV/0!	#DIV/0!	0
A0A8M6YY36	sorbin and SH3 domain-containing protein 2 isoform X1 OS=Danio rerio OX=7955 GN=sorbs2a PE=4 SV=1 - [A0A8M6YY36_DANRE]	1	1	1	0	0						2.60216	1.13	1	1															#DIV/0!	#DIV/0!	0
A0A8M6Z890	leucine-rich repeat-containing protein 63-like OS=Danio rerio OX=7955 GN=LOC101885626 PE=4 SV=1 - [A0A8M6Z890_DANRE]	1	1	1	0	0						2.54785	4.87	1	1															#DIV/0!	#DIV/0!	0
A0A8M9P8V5	zinc finger ZZ-type and EF-hand domain-containing protein 1 isoform X1 OS=Danio rerio OX=7955 GN=zzef1 PE=4 SV=1 - [A0A8M9P8V5_DANRE]	1	1	1	0	0						2.50941	0.82	1	1															#DIV/0!	#DIV/0!	0
A0A8M9Q1L9	myosin-binding protein C, cardiac-type isoform X1 OS=Danio rerio OX=7955 GN=mybpc3 PE=4 SV=1 - [A0A8M9Q1L9_DANRE]	1	1	1	0	0						0	1.31	1	1															#DIV/0!	#DIV/0!	0
A0A8M9Q422	transmembrane protease serine 7 OS=Danio rerio OX=7955 GN=tmprss7 PE=4 SV=1 - [A0A8M9Q422_DANRE]	1	1	1	0	0						3.07236	2.14	1	1															#DIV/0!	#DIV/0!	0
A0A8N7TBW3	protein bicaudal C homolog 1 OS=Danio rerio OX=7955 GN=bicc1b PE=3 SV=1 - [A0A8N7TBW3_DANRE]	1	1	1	0	0						3.70529	1.88	1	1															#DIV/0!	#DIV/0!	0

## Sheet: Zf retina Cx35.1 SAINT analysis
	SAINT analysis performed via REPRINT-apms.org using only experiment-specific controls. Data quantified by Peptide Spectral Matches (SPC) and ranked by SAINT probability score (SP)
bait	baitGene	prey	preyGene	Quant (SPC or Intensities)	User Controls (SPC or Intensities)	CRAP Controls (SPC)	Avg. SPC	FCA	FCB	SP	iRef	intAct	iRef-Evidence	intAct-Evidence
gjd2b	gjd2b	A0A8M3AZ90	ptpn20	33|55	0|0	-	44	43.572	41.9565	1	0	0	na	na
gjd2b	gjd2b	A0A8M3B637	tjp2a	22|36	0|0	-	29	29.0521	28.0654	1	0	0	na	na
gjd2b	gjd2b	A0A8M3BB23	tjp1a	23|44	0|0	-	33.5	33.4701	31.6138	1	0	0	na	na
gjd2b	gjd2b	A0A8N7T637	si:dkeyp-72e1.9 (stxbp4l)	12|14	0|0	-	13	13.5175	13.4537	1	0	0	na	na
gjd2b	gjd2b	A0A8M9QA64	LOC556872 (magi1)	3|5	0|0	-	4	4.87018	4.7515	1	0	0	na	na
gjd2b	gjd2b	A0A8M2BIB8	usp53b	4|6	0|0	-	5	5.83099	5.72714	1	0	0	na	na
gjd2b	gjd2b	A0A8M9PJP1	si:ch211-13f8.1 (KIAA1614 orthologue)	10|23	0|0	-	16.5	17.0285	15.6593	1	0	0	na	na
gjd2b	gjd2b	A0A8M3AN32	si:dkey-121a11.3 (KIAA1614)	5|5	0|0	-	5	5.80404	5.80247	1	0	0	na	na
gjd2b	gjd2b	A0A8M6Z0B7	mpdz	5|20	0|0	-	12.5	13.2122	10.8474	1	0	0	na	na
gjd2b	gjd2b	A0A8M3B0R8	LOC100331216 (gjd1b)	4|5	0|0	-	4.5	5.33711	5.30309	1	0	0	na	na
gjd2b	gjd2b	A0A8M3B4S3	stxbp4	32|38	0|0	-	35	34.7091	34.4976	1	0	0	na	na
gjd2b	gjd2b	A0A8M3AUX4	LOC103911473 (tjp2l)	12|20	0|0	-	16	16.4807	15.9168	1	0	0	na	na
gjd2b	gjd2b	A0A8M9PQ24	mllt4a (afadin)	3|6	0|0	-	4.5	5.36406	5.13145	1	0	0	na	na
gjd2b	gjd2b	A0A8M9PHF8	tjp1b	20|41	0|0	-	30.5	30.5876	28.5756	1	0	0	na	na
gjd2b	gjd2b	A0A8M1NWK9	hspa8b	3|4	0|0	-	3.5	4.3763	4.3384	1	0	0	na	na
gjd2b	gjd2b	M1EVR1	SLC12A5 (kcc2)	3|11	0|0	-	7	7.83346	6.71617	1	0	0	na	na
gjd2b	gjd2b	A0A8M2B3R6	synrg	2|6	0|0	-	4	4.89713	4.45683	0.99	0	0	na	na
gjd2b	gjd2b	A0A8M9Q103	si:ch211-59d13.2 (slc12 member5)	2|8	0|0	-	5	5.88489	5.05258	0.99	0	0	na	na
gjd2b	gjd2b	A0A8M6YY94	kcnh2b	3|2	0|0	-	2.5	3.38854	3.36328	0.98	0	0	na	na
gjd2b	gjd2b	A0A8M1N1X8	myo6b	16|22	5|0	-	19	5.9881	5.8951	0.97	0	0	na	na
gjd2b	gjd2b	A0A8M1N377	slc7a3	2|2	0|0	-	2	2.92162	2.92112	0.97	0	0	na	na
gjd2b	gjd2b	A0A8N7TB01	pkp4	2|2	0|0	-	2	2.92162	2.92112	0.97	0	0	na	na
gjd2b	gjd2b	A0A8M2BGN3	iqsec1b	3|0	0|0	-	1.5	2.40078	1.94976	0.5	0	0	na	na
gjd2b	gjd2b	A0A8M2BA14	slc12a7b	0|3	0|0	-	1.5	2.48164	1.9908	0.5	0	0	na	na
gjd2b	gjd2b	A0A8M3ART2	iqsec3a	5|0	0|0	-	2.5	3.33464	2.38102	0.5	0	0	na	na
gjd2b	gjd2b	Q8AYN0	opn1lw2	5|1	0|0	-	3	3.82852	3.35696	0.5	0	0	na	na
gjd2b	gjd2b	A0A8M9QHY1	slc4a10a	0|7	0|0	-	3.5	4.45716	2.81324	0.5	0	0	na	na
gjd2b	gjd2b	A0A8M6YZ78	zmp:0000000794 (C9orf172 homolog)	3|0	0|0	-	1.5	2.40078	1.94976	0.5	0	0	na	na
gjd2b	gjd2b	A0A8M9PG19	tnikb	0|5	0|0	-	2.5	3.4694	2.43696	0.5	0	0	na	na
gjd2b	gjd2b	A0A8M2BGU3	LOC101886286	3|1	0|0	-	2	2.89466	2.74893	0.5	0	0	na	na
gjd2b	gjd2b	A0A8M9PXZ0	cnksr2a	0|3	0|0	-	1.5	2.48164	1.9908	0.5	0	0	na	na
gjd2b	gjd2b	A0A8M1PET4	akap8l	3|0	0|0	-	1.5	2.40078	1.94976	0.5	0	0	na	na
gjd2b	gjd2b	Q6R005	dlg4	1|4	0|0	-	2.5	3.44245	3.09428	0.5	0	0	na	na
gjd2b	gjd2b	A0A8M9P9V0	magixa	3|0	0|0	-	1.5	2.40078	1.94976	0.5	0	0	na	na
gjd2b	gjd2b	A0A8M9PD17	col5a1	0|3	0|0	-	1.5	2.48164	1.9908	0.5	0	0	na	na
gjd2b	gjd2b	A0A8M9PXB8	zgc:86725 (actc1)	14|0	0|0	-	7	7.53699	3.75153	0.5	0	0	na	na
gjd2b	gjd2b	A0A8M6YW17	fbn1	0|5	0|0	-	2.5	3.4694	2.43696	0.5	0	0	na	na
gjd2b	gjd2b	A0A8M1NAN4	vtg4	3|0	0|0	-	1.5	2.40078	1.94976	0.5	0	0	na	na
gjd2b	gjd2b	A0A8M3AQE4	LOC101884217 (Mprip-like)	7|0	0|0	-	3.5	4.2685	2.74536	0.5	0	0	na	na
gjd2b	gjd2b	Q98SP7	bbs2	0|2	0|0	-	1	1.98776	1.72497	0.49	0	0	na	na
gjd2b	gjd2b	A0A8M9PY69	si:dkey-92j12.5 (mpdz isoform X1)	2|0	0|0	-	1	1.93386	1.69343	0.49	0	0	na	na
gjd2b	gjd2b	Q7SXP0	sec22bb	0|2	0|0	-	1	1.98776	1.72497	0.49	0	0	na	na
gjd2b	gjd2b	A0A8M9PFY2	eps15l1a	0|2	0|0	-	1	1.98776	1.72497	0.49	0	0	na	na
gjd2b	gjd2b	A0A8M3ARX1	ino80	2|0	0|0	-	1	1.93386	1.69343	0.49	0	0	na	na
gjd2b	gjd2b	A0A8M1RLK2	iqce	2|0	0|0	-	1	1.93386	1.69343	0.49	0	0	na	na
gjd2b	gjd2b	A0A8M3AXQ6	mast1b	0|2	0|0	-	1	1.98776	1.72497	0.49	0	0	na	na
gjd2b	gjd2b	A0A8M1RL76	ctnnd2a	0|2	0|0	-	1	1.98776	1.72497	0.49	0	0	na	na
gjd2b	gjd2b	A0A8M9PSC8	LOC103909541	2|0	0|0	-	1	1.93386	1.69343	0.49	0	0	na	na
gjd2b	gjd2b	A0A8M2B525	im:7147486	2|0	0|0	-	1	1.93386	1.69343	0.49	0	0	na	na
gjd2b	gjd2b	A0A8M2BA28	col11a1a	0|2	0|0	-	1	1.98776	1.72497	0.49	0	0	na	na
gjd2b	gjd2b	A0A8M1QR29	fam124a	2|0	0|0	-	1	1.93386	1.69343	0.49	0	0	na	na
gjd2b	gjd2b	Q5BJJ8	mrpl51	2|1	0|0	-	1.5	2.42774	2.38753	0.49	0	0	na	na
gjd2b	gjd2b	Q9PUE4	copg2	1|2	0|0	-	1.5	2.45469	2.3988	0.49	0	0	na	na
gjd2b	gjd2b	A0A8M2BBL4	LOC796777 (ppp1r29l; elfn2)	1|2	0|0	-	1.5	2.45469	2.3988	0.49	0	0	na	na
gjd2b	gjd2b	A0A0R4ITC5	trrap	0|2	0|0	-	1	1.98776	1.72497	0.49	0	0	na	na
gjd2b	gjd2b	O57521	hsp90ab1	2|0	0|0	-	1	1.93386	1.69343	0.49	0	0	na	na
gjd2b	gjd2b	A0A8M3BDW6	sptbn1	1|2	0|0	-	1.5	2.45469	2.3988	0.49	0	0	na	na
gjd2b	gjd2b	A0A8M3B5H0	pcdh15a	0|2	0|0	-	1	1.98776	1.72497	0.49	0	0	na	na
gjd2b	gjd2b	Q6PBW5	rpe65a	9|1	2|0	-	5	3.01126	2.28568	0.49	0	0	na	na
gjd2b	gjd2b	A0A8M9P4H5	LOC103909641 (5ht3al)	0|2	0|0	-	1	1.98776	1.72497	0.49	0	0	na	na
gjd2b	gjd2b	A0A8M1NBW4	bbs4	0|2	0|0	-	1	1.98776	1.72497	0.49	0	0	na	na
gjd2b	gjd2b	A0A8M9Q812	huwe1	2|0	0|0	-	1	1.93386	1.69343	0.49	0	0	na	na
gjd2b	gjd2b	A0A8M3B8R1	si:ch211-214j24.9 (ap180 isoform X1)	1|2	0|0	-	1.5	2.45469	2.3988	0.49	0	0	na	na
gjd2b	gjd2b	A0A8M3AKR9	si:dkey-89b17.4 (zfn646 X1)	2|0	0|0	-	1	1.93386	1.69343	0.49	0	0	na	na
gjd2b	gjd2b	A0A8N7TBX7	pfkla	2|0	0|0	-	1	1.93386	1.69343	0.49	0	0	na	na
gjd2b	gjd2b	A0A8M6Z9M1	picalmb	1|2	0|0	-	1.5	2.45469	2.3988	0.49	0	0	na	na
gjd2b	gjd2b	A0A8M3AJG6	pclob	10|0	3|0	-	5	2.4254	1.37558	0.48	0	0	na	na
gjd2b	gjd2b	A0A8M2B3J4	cltcb	7|0	2|0	-	3.5	2.2565	1.45131	0.48	0	0	na	na
gjd2b	gjd2b	A0A8M3AWS2	cltca	7|0	2|0	-	3.5	2.2565	1.45131	0.48	0	0	na	na
gjd2b	gjd2b	A0A8M2BGP7	hp1bp3	14|5	6|3	-	9.5	1.85909	1.69856	0.47	0	0	na	na
gjd2b	gjd2b	A0A8M9QDM1	plekha6	0|9	0|3	-	4.5	2.01107	1.16153	0.47	0	0	na	na
gjd2b	gjd2b	A0A8M9PH95	myo6a	6|0	2|0	-	3	2.00967	1.35843	0.46	0	0	na	na
gjd2b	gjd2b	A0A8M1PUF2	A0A8M1PUF2	3|1	0|1	-	2	1.84472	1.75185	0.43	0	0	na	na
gjd2b	gjd2b	A0A8M1PAN1	A0A8M1PAN1	5|0	2|0	-	2.5	1.76283	1.25871	0.42	0	0	na	na
gjd2b	gjd2b	A0A8N7T728	A0A8N7T728	4|0	2|0	-	2	1.51599	1.15038	0.37	0	0	na	na
gjd2b	gjd2b	A0A8M1N7S5	A0A8M1N7S5	4|0	2|0	-	2	1.51599	1.15038	0.37	0	0	na	na
gjd2b	gjd2b	Q642H9	Q642H9	6|0	3|1	-	3	1.3079	0.88407	0.33	0	0	na	na
gjd2b	gjd2b	A0A8M1N2A2	A0A8M1N2A2	5|0	3|0	-	2.5	1.42661	1.01864	0.33	0	0	na	na
gjd2b	gjd2b	Q9PVK4	Q9PVK4	2|0	1|0	-	1	1.33755	1.17126	0.31	0	0	na	na
gjd2b	gjd2b	A0A8M3AL15	A0A8M3AL15	2|0	1|0	-	1	1.33755	1.17126	0.31	0	0	na	na
gjd2b	gjd2b	A0A8N1Z184	A0A8N1Z184	1|2	0|1	-	1.5	1.56433	1.52872	0.31	0	0	na	na
gjd2b	gjd2b	A0A8N7UR79	A0A8N7UR79	2|0	1|0	-	1	1.33755	1.17126	0.31	0	0	na	na
gjd2b	gjd2b	A0A8M9QKG2	A0A8M9QKG2	2|0	1|0	-	1	1.33755	1.17126	0.31	0	0	na	na
gjd2b	gjd2b	Q7SYK7	Q7SYK7	2|0	1|0	-	1	1.33755	1.17126	0.31	0	0	na	na
gjd2b	gjd2b	A0A8N1Z0T1	A0A8N1Z0T1	2|0	1|0	-	1	1.33755	1.17126	0.31	0	0	na	na
gjd2b	gjd2b	Q9W6A8	Q9W6A8	2|1	0|1	-	1.5	1.54716	1.52154	0.31	0	0	na	na
gjd2b	gjd2b	A0A8M9PRM2	A0A8M9PRM2	2|0	1|0	-	1	1.33755	1.17126	0.31	0	0	na	na
gjd2b	gjd2b	A0A8N7TCW2	A0A8N7TCW2	3|0	1|1	-	1.5	1.19147	0.967633	0.27	0	0	na	na
gjd2b	gjd2b	Q90474	Q90474	3|0	2|0	-	1.5	1.26915	1.03072	0.27	0	0	na	na
gjd2b	gjd2b	A0A8M1PEW0	A0A8M1PEW0	3|0	2|0	-	1.5	1.26915	1.03072	0.27	0	0	na	na
gjd2b	gjd2b	Q7T356	Q7T356	3|0	2|0	-	1.5	1.26915	1.03072	0.27	0	0	na	na
gjd2b	gjd2b	A0A8M1N9C1	A0A8M1N9C1	3|0	2|0	-	1.5	1.26915	1.03072	0.27	0	0	na	na
gjd2b	gjd2b	A0A8M1P8M3	A0A8M1P8M3	0|17	1|10	-	8.5	1.31644	0.590978	0.23	0	0	na	na
gjd2b	gjd2b	A0A8M3AVH5	A0A8M3AVH5	10|0	7|0	-	5	1.37579	0.780286	0.22	0	0	na	na
gjd2b	gjd2b	A0A8M2B9C5	A0A8M2B9C5	10|0	7|0	-	5	1.37579	0.780286	0.22	0	0	na	na
gjd2b	gjd2b	A0A8M1RM42	A0A8M1RM42	8|0	6|0	-	4	1.28858	0.791981	0.19	0	0	na	na
gjd2b	gjd2b	A0A8M1P1Z0	A0A8M1P1Z0	5|0	3|1	-	2.5	1.14726	0.819173	0.18	0	0	na	na
gjd2b	gjd2b	A2BIL7	A2BIL7	0|6	0|5	-	3	1.03055	0.684342	0.15	0	0	na	na
gjd2b	gjd2b	A0A8M6Z6E5	A0A8M6Z6E5	9|0	7|0	-	4.5	1.26248	0.744212	0.15	0	0	na	na
gjd2b	gjd2b	Q9W6A7	Q9W6A7	6|0	5|0	-	3	1.17728	0.79578	0.15	0	0	na	na
gjd2b	gjd2b	Q7SY23	Q7SY23	2|0	2|0	-	1	1.02232	0.895218	0.14	0	0	na	na
gjd2b	gjd2b	A0A8M9PQW6	A0A8M9PQW6	2|0	2|0	-	1	1.02232	0.895218	0.14	0	0	na	na
gjd2b	gjd2b	A0A8M2B2W1	A0A8M2B2W1	2|0	2|0	-	1	1.02232	0.895218	0.14	0	0	na	na
gjd2b	gjd2b	F1QGH7	F1QGH7	2|0	0|2	-	1	0.904382	0.791946	0.14	0	0	na	na
gjd2b	gjd2b	A0A8M3B025	A0A8M3B025	2|0	2|0	-	1	1.02232	0.895218	0.14	0	0	na	na
gjd2b	gjd2b	A0A8M1RN59	A0A8M1RN59	2|0	2|0	-	1	1.02232	0.895218	0.14	0	0	na	na
gjd2b	gjd2b	A0A8M1RE46	A0A8M1RE46	2|1	2|0	-	1.5	1.2834	1.26215	0.14	0	0	na	na
gjd2b	gjd2b	A0A8M6YVB9	A0A8M6YVB9	2|0	2|0	-	1	1.02232	0.895218	0.14	0	0	na	na
gjd2b	gjd2b	Q8AYM7	Q8AYM7	3|0	3|0	-	1.5	1.02709	0.834135	0.12	0	0	na	na
gjd2b	gjd2b	A0A8M1PK30	A0A8M1PK30	3|0	3|0	-	1.5	1.02709	0.834135	0.12	0	0	na	na
gjd2b	gjd2b	A0A8M2B6A3	A0A8M2B6A3	0|3	3|0	-	1.5	1.06168	0.851692	0.12	0	0	na	na
gjd2b	gjd2b	A0A8M9PJ56	A0A8M9PJ56	3|0	3|0	-	1.5	1.02709	0.834135	0.12	0	0	na	na
gjd2b	gjd2b	A0A8M2BJT5	A0A8M2BJT5	3|0	3|0	-	1.5	1.02709	0.834135	0.12	0	0	na	na
gjd2b	gjd2b	A0A8M1NZE8	A0A8M1NZE8	3|0	3|0	-	1.5	1.02709	0.834135	0.12	0	0	na	na
gjd2b	gjd2b	A0A8M1N2Q4	A0A8M1N2Q4	7|0	6|0	-	3.5	1.16152	0.747051	0.11	0	0	na	na
gjd2b	gjd2b	A0A8M1P526	A0A8M1P526	10|0	8|0	-	5	1.24147	0.704109	0.11	0	0	na	na
gjd2b	gjd2b	A0A8N7TF89	A0A8N7TF89	9|11	0|9	-	10	1.73706	1.7254	0.09	0	0	na	na
gjd2b	gjd2b	A0A8N7UUK6	A0A8N7UUK6	5|0	5|0	-	2.5	1.03268	0.737364	0.07	0	0	na	na
gjd2b	gjd2b	Q9W6A5	Q9W6A5	5|0	5|0	-	2.5	1.03268	0.737364	0.07	0	0	na	na
gjd2b	gjd2b	A0A8M6Z1M4	A0A8M6Z1M4	0|5	0|5	-	2.5	0.902129	0.63367	0.07	0	0	na	na
gjd2b	gjd2b	A0A8M9PNN6	A0A8M9PNN6	5|0	5|0	-	2.5	1.03268	0.737364	0.07	0	0	na	na
gjd2b	gjd2b	A0A8N7TAN6	A0A8N7TAN6	6|0	6|0	-	3	1.03446	0.69924	0.05	0	0	na	na
gjd2b	gjd2b	A0A8M1PE26	A0A8M1PE26	2|2	1|2	-	2	1.1306	1.1304	0.05	0	0	na	na
gjd2b	gjd2b	A0A8M1PF78	A0A8M1PF78	3|3	3|1	-	3	1.33572	1.33543	0.04	0	0	na	na
gjd2b	gjd2b	A0A8M1N0G8	A0A8M1N0G8	2|1	0|3	-	1.5	0.896679	0.881831	0.04	0	0	na	na
gjd2b	gjd2b	A0A8M9PS32	A0A8M9PS32	2|0	3|0	-	1	0.827331	0.724474	0.04	0	0	na	na
gjd2b	gjd2b	A0A8M1PHE0	A0A8M1PHE0	2|0	3|0	-	1	0.827331	0.724474	0.04	0	0	na	na
gjd2b	gjd2b	A0A8M2BCV1	A0A8M2BCV1	2|0	3|0	-	1	0.827331	0.724474	0.04	0	0	na	na
gjd2b	gjd2b	A0A8M1QHA2	A0A8M1QHA2	3|0	4|0	-	1.5	0.862572	0.700525	0.03	0	0	na	na
gjd2b	gjd2b	A0A8M9PWI4	A0A8M9PWI4	4|1	5|0	-	2.5	1.04103	0.950121	0.03	0	0	na	na
gjd2b	gjd2b	A0A8M9PRW1	A0A8M9PRW1	1|3	2|2	-	2	0.973138	0.913698	0.02	0	0	na	na
gjd2b	gjd2b	A0A8M1P6D7	A0A8M1P6D7	5|8	4|4	-	6.5	1.43988	1.404	0.02	0	0	na	na
gjd2b	gjd2b	A0A8M9PMF7	A0A8M9PMF7	2|0	2|1	-	1	0.785864	0.688163	0.02	0	0	na	na
gjd2b	gjd2b	Q8AYM8	Q8AYM8	7|1	6|2	-	4	0.989432	0.804161	0.01	0	0	na	na
gjd2b	gjd2b	Q6P0V6	Q6P0V6	5|7	6|2	-	6	1.41106	1.39166	0.01	0	0	na	na
gjd2b	gjd2b	A0A8M3AXX0	A0A8M3AXX0	14|0	12|1	-	7	1.08932	0.542206	0.01	0	0	na	na
gjd2b	gjd2b	A0A8M1P7X5	A0A8M1P7X5	14|0	13|0	-	7	1.10909	0.552047	0.01	0	0	na	na
gjd2b	gjd2b	A0A8M1P9F3	A0A8M1P9F3	3|0	5|0	-	1.5	0.743483	0.603808	0.01	0	0	na	na
gjd2b	gjd2b	A0A8M6YZA4	A0A8M6YZA4	3|0	5|0	-	1.5	0.743483	0.603808	0.01	0	0	na	na
gjd2b	gjd2b	A0A8M3B1P0	A0A8M3B1P0	3|0	5|0	-	1.5	0.743483	0.603808	0.01	0	0	na	na
gjd2b	gjd2b	F1R2X6	F1R2X6	3|0	5|0	-	1.5	0.743483	0.603808	0.01	0	0	na	na
gjd2b	gjd2b	A0A8M1PI34	A0A8M1PI34	6|0	7|0	-	3	0.922543	0.62359	0.01	0	0	na	na
gjd2b	gjd2b	Q7ZW33	Q7ZW33	1|0	0|0	-	0.5	1.46693	1.39063	0	0	0	na	na
gjd2b	gjd2b	A0A8M2B809	A0A8M2B809	1|0	0|0	-	0.5	1.46693	1.39063	0	0	0	na	na
gjd2b	gjd2b	A0A8M1ND41	A0A8M1ND41	0|1	0|1	-	0.5	0.952026	0.898494	0	0	0	na	na
gjd2b	gjd2b	Q90257	Q90257	3|1	9|3	-	2	0.430762	0.409075	0	0	0	na	na
gjd2b	gjd2b	A0A8M2B4L7	A0A8M2B4L7	0|1	0|0	-	0.5	1.49388	1.40988	0	0	0	na	na
gjd2b	gjd2b	A0A8M3AXU2	A0A8M3AXU2	0|1	0|0	-	0.5	1.49388	1.40988	0	0	0	na	na
gjd2b	gjd2b	A0A8M2BJS4	A0A8M2BJS4	0|1	0|0	-	0.5	1.49388	1.40988	0	0	0	na	na
gjd2b	gjd2b	A0A8M1PD92	A0A8M1PD92	19|0	19|0	-	9.5	1.04234	0.457136	0	0	0	na	na
gjd2b	gjd2b	A0A8M9Q0R7	A0A8M9Q0R7	1|0	0|0	-	0.5	1.46693	1.39063	0	0	0	na	na
gjd2b	gjd2b	A0A8M2B2I8	A0A8M2B2I8	1|0	0|0	-	0.5	1.46693	1.39063	0	0	0	na	na
gjd2b	gjd2b	A0A8M1NTF4	A0A8M1NTF4	0|3	8|0	-	1.5	0.543436	0.435951	0	0	0	na	na
gjd2b	gjd2b	A0A8N7UUM6	A0A8N7UUM6	1|0	0|0	-	0.5	1.46693	1.39063	0	0	0	na	na
gjd2b	gjd2b	Q7ZVF9	Q7ZVF9	18|7	21|5	-	12.5	0.973791	0.898862	0	0	0	na	na
gjd2b	gjd2b	A0A8M1NIS1	A0A8M1NIS1	1|0	0|0	-	0.5	1.46693	1.39063	0	0	0	na	na
gjd2b	gjd2b	A0A8M1PHT4	A0A8M1PHT4	0|1	0|0	-	0.5	1.49388	1.40988	0	0	0	na	na
gjd2b	gjd2b	A0A8M1PF90	A0A8M1PF90	1|0	0|0	-	0.5	1.46693	1.39063	0	0	0	na	na
gjd2b	gjd2b	A0A8M9PN59	A0A8M9PN59	0|1	0|0	-	0.5	1.49388	1.40988	0	0	0	na	na
gjd2b	gjd2b	A0A8M1QV93	A0A8M1QV93	8|4	5|8	-	6	0.862326	0.832146	0	0	0	na	na
gjd2b	gjd2b	A0A8M9Q5G7	A0A8M9Q5G7	1|0	0|0	-	0.5	1.46693	1.39063	0	0	0	na	na
gjd2b	gjd2b	A0A8M2BGU4	A0A8M2BGU4	0|1	0|0	-	0.5	1.49388	1.40988	0	0	0	na	na
gjd2b	gjd2b	A0A8M1RDD4	A0A8M1RDD4	1|0	0|0	-	0.5	1.46693	1.39063	0	0	0	na	na
gjd2b	gjd2b	A0A8M1MZM2	A0A8M1MZM2	1|0	3|0	-	0.5	0.627573	0.594932	0	0	0	na	na
gjd2b	gjd2b	A0A8N1TXU9	A0A8N1TXU9	1|0	0|0	-	0.5	1.46693	1.39063	0	0	0	na	na
gjd2b	gjd2b	A7Y7X5	A7Y7X5	1|0	0|0	-	0.5	1.46693	1.39063	0	0	0	na	na
gjd2b	gjd2b	F1RAX4	F1RAX4	1|0	0|0	-	0.5	1.46693	1.39063	0	0	0	na	na
gjd2b	gjd2b	A0A8M1NG49	A0A8M1NG49	1|0	1|0	-	0.5	1.0146	0.961828	0	0	0	na	na
gjd2b	gjd2b	A0A8M1N8J6	A0A8M1N8J6	0|1	0|1	-	0.5	0.952026	0.898494	0	0	0	na	na
gjd2b	gjd2b	A0A8M3BEG6	A0A8M3BEG6	1|3	1|6	-	2	0.606605	0.569553	0	0	0	na	na
gjd2b	gjd2b	A0A8M3B4R7	A0A8M3B4R7	1|0	1|0	-	0.5	1.0146	0.961828	0	0	0	na	na
gjd2b	gjd2b	A0A8M2BAM8	A0A8M2BAM8	1|1	0|0	-	1	1.96081	1.96062	0	0	0	na	na
gjd2b	gjd2b	A0A8M1NBC4	A0A8M1NBC4	1|0	2|0	-	0.5	0.775479	0.735145	0	0	0	na	na
gjd2b	gjd2b	A0A8M9Q1B2	A0A8M9Q1B2	0|1	0|0	-	0.5	1.49388	1.40988	0	0	0	na	na
gjd2b	gjd2b	A0A8M9QIB7	A0A8M9QIB7	0|1	0|0	-	0.5	1.49388	1.40988	0	0	0	na	na
gjd2b	gjd2b	A0A8M9P2G9	A0A8M9P2G9	0|1	0|0	-	0.5	1.49388	1.40988	0	0	0	na	na
gjd2b	gjd2b	Q6PH57	Q6PH57	1|0	1|0	-	0.5	1.0146	0.961828	0	0	0	na	na
gjd2b	gjd2b	A0A8M3AY56	A0A8M3AY56	0|1	0|0	-	0.5	1.49388	1.40988	0	0	0	na	na
gjd2b	gjd2b	A0A8M2B7J3	A0A8M2B7J3	1|0	2|0	-	0.5	0.775479	0.735145	0	0	0	na	na
gjd2b	gjd2b	A0A8M9P5U9	A0A8M9P5U9	0|4	7|0	-	2	0.722082	0.539973	0	0	0	na	na
gjd2b	gjd2b	A0A8N7T793	A0A8N7T793	0|1	0|0	-	0.5	1.49388	1.40988	0	0	0	na	na
gjd2b	gjd2b	A0A8N7UYB5	A0A8N7UYB5	1|0	0|0	-	0.5	1.46693	1.39063	0	0	0	na	na
gjd2b	gjd2b	A0A8M1PA89	A0A8M1PA89	3|2	3|2	-	2.5	0.974902	0.967632	0	0	0	na	na
gjd2b	gjd2b	A0A8N7UQV9	A0A8N7UQV9	1|0	0|0	-	0.5	1.46693	1.39063	0	0	0	na	na
gjd2b	gjd2b	A0A8M2B970	A0A8M2B970	1|0	0|1	-	0.5	0.93485	0.886228	0	0	0	na	na
gjd2b	gjd2b	A0A8M1N5J0	A0A8M1N5J0	2|0	4|0	-	1	0.694811	0.608429	0	0	0	na	na
gjd2b	gjd2b	A0A8M1PB19	A0A8M1PB19	1|0	0|0	-	0.5	1.46693	1.39063	0	0	0	na	na
gjd2b	gjd2b	Q6PC14	Q6PC14	1|0	4|1	-	0.5	0.43757	0.414811	0	0	0	na	na
gjd2b	gjd2b	A0A8M6YT69	A0A8M6YT69	1|0	0|0	-	0.5	1.46693	1.39063	0	0	0	na	na
gjd2b	gjd2b	A0A8M3B3F1	A0A8M3B3F1	2|11	15|14	-	6.5	0.470539	0.372598	0	0	0	na	na
gjd2b	gjd2b	Q5RHI5	Q5RHI5	0|1	0|0	-	0.5	1.49388	1.40988	0	0	0	na	na
gjd2b	gjd2b	A0A8M9QI71	A0A8M9QI71	1|0	0|0	-	0.5	1.46693	1.39063	0	0	0	na	na
gjd2b	gjd2b	A0A8M1NRM0	A0A8M1NRM0	1|0	0|0	-	0.5	1.46693	1.39063	0	0	0	na	na
gjd2b	gjd2b	A0A8M3AJ63	A0A8M3AJ63	1|0	1|0	-	0.5	1.0146	0.961828	0	0	0	na	na
gjd2b	gjd2b	A0A8M1QUW7	A0A8M1QUW7	87|0	58|0	-	43.5	1.54975	0.337667	0	0	0	na	na
gjd2b	gjd2b	A0A8M9PZ32	A0A8M9PZ32	1|0	0|0	-	0.5	1.46693	1.39063	0	0	0	na	na
gjd2b	gjd2b	Q7SXA1	Q7SXA1	20|24	35|29	-	22	0.670254	0.665938	0	0	0	na	na
gjd2b	gjd2b	A0A8M6Z399	A0A8M6Z399	0|1	0|1	-	0.5	0.952026	0.898494	0	0	0	na	na
gjd2b	gjd2b	A0A8M1Q6T5	A0A8M1Q6T5	13|15	12|14	-	14	1.01119	1.00686	0	0	0	na	na
gjd2b	gjd2b	A0A8M1Q6T7	A0A8M1Q6T7	1|0	0|0	-	0.5	1.46693	1.39063	0	0	0	na	na
gjd2b	gjd2b	Q90YJ2	Q90YJ2	1|0	0|0	-	0.5	1.46693	1.39063	0	0	0	na	na
gjd2b	gjd2b	A0A8M2BLV2	A0A8M2BLV2	1|0	0|0	-	0.5	1.46693	1.39063	0	0	0	na	na
gjd2b	gjd2b	A0A8M9PKW2	A0A8M9PKW2	61|96	50|79	-	78.5	1.12659	1.09192	0	0	0	na	na
gjd2b	gjd2b	A0A8M9Q0M9	A0A8M9Q0M9	0|1	0|0	-	0.5	1.49388	1.40988	0	0	0	na	na
gjd2b	gjd2b	A0A8M6YYI1	A0A8M6YYI1	9|11	10|10	-	10	0.953832	0.947428	0	0	0	na	na
gjd2b	gjd2b	A0A8M1PSJ7	A0A8M1PSJ7	1|0	0|0	-	0.5	1.46693	1.39063	0	0	0	na	na
gjd2b	gjd2b	Q1L8U8	Q1L8U8	1|0	0|0	-	0.5	1.46693	1.39063	0	0	0	na	na
gjd2b	gjd2b	A0A8M1PFF6	A0A8M1PFF6	6|7	8|6	-	6.5	0.909442	0.905725	0	0	0	na	na
gjd2b	gjd2b	A0A8M1RI06	A0A8M1RI06	0|1	1|0	-	0.5	1.03324	0.975141	0	0	0	na	na
gjd2b	gjd2b	A0A8M1PSC9	A0A8M1PSC9	1|0	0|0	-	0.5	1.46693	1.39063	0	0	0	na	na
gjd2b	gjd2b	Q5RHR0	Q5RHR0	1|0	1|0	-	0.5	1.0146	0.961828	0	0	0	na	na
gjd2b	gjd2b	A0A8M1RNL2	A0A8M1RNL2	1|0	0|0	-	0.5	1.46693	1.39063	0	0	0	na	na
gjd2b	gjd2b	A0A8M2BBT4	A0A8M2BBT4	0|1	0|0	-	0.5	1.49388	1.40988	0	0	0	na	na
gjd2b	gjd2b	A0A8M1PEG3	A0A8M1PEG3	23|0	27|0	-	11.5	0.900452	0.363666	0	0	0	na	na
gjd2b	gjd2b	A0A8M3B8A2	A0A8M3B8A2	0|1	0|0	-	0.5	1.49388	1.40988	0	0	0	na	na
gjd2b	gjd2b	A0A8M1N0Y0	A0A8M1N0Y0	1|0	2|0	-	0.5	0.775479	0.735145	0	0	0	na	na
gjd2b	gjd2b	A0A8M3AX48	A0A8M3AX48	1|0	0|0	-	0.5	1.46693	1.39063	0	0	0	na	na
gjd2b	gjd2b	A0A8M9Q8Z8	A0A8M9Q8Z8	0|1	0|0	-	0.5	1.49388	1.40988	0	0	0	na	na
gjd2b	gjd2b	A0A8M2BEJ3	A0A8M2BEJ3	0|1	0|0	-	0.5	1.49388	1.40988	0	0	0	na	na
gjd2b	gjd2b	P35359	P35359	8|4	10|4	-	6	0.867625	0.837259	0	0	0	na	na
gjd2b	gjd2b	A0A8M3AQJ0	A0A8M3AQJ0	1|0	0|0	-	0.5	1.46693	1.39063	0	0	0	na	na
gjd2b	gjd2b	A0A8M1N787	A0A8M1N787	0|1	0|0	-	0.5	1.49388	1.40988	0	0	0	na	na
gjd2b	gjd2b	A0A8M2B8S1	A0A8M2B8S1	0|1	0|0	-	0.5	1.49388	1.40988	0	0	0	na	na
gjd2b	gjd2b	A2BGL3	A2BGL3	1|0	0|1	-	0.5	0.93485	0.886228	0	0	0	na	na
gjd2b	gjd2b	A0A8N7TBM6	A0A8N7TBM6	3|0	6|0	-	1.5	0.653288	0.530558	0	0	0	na	na
gjd2b	gjd2b	A0A8M9PSS1	A0A8M9PSS1	0|1	0|0	-	0.5	1.49388	1.40988	0	0	0	na	na
gjd2b	gjd2b	A0A8M9PYW2	A0A8M9PYW2	1|0	0|0	-	0.5	1.46693	1.39063	0	0	0	na	na
gjd2b	gjd2b	A0A8N7T6K7	A0A8N7T6K7	0|1	0|0	-	0.5	1.49388	1.40988	0	0	0	na	na
gjd2b	gjd2b	A0A8M6Z229	A0A8M6Z229	0|1	0|0	-	0.5	1.49388	1.40988	0	0	0	na	na
gjd2b	gjd2b	A0A8M9PU00	A0A8M9PU00	0|1	0|0	-	0.5	1.49388	1.40988	0	0	0	na	na
gjd2b	gjd2b	A0A8M2BKQ4	A0A8M2BKQ4	1|0	0|0	-	0.5	1.46693	1.39063	0	0	0	na	na
gjd2b	gjd2b	A0A8M6Z6L2	A0A8M6Z6L2	0|1	0|0	-	0.5	1.49388	1.40988	0	0	0	na	na
gjd2b	gjd2b	A0A8M9Q9V9	A0A8M9Q9V9	1|0	0|0	-	0.5	1.46693	1.39063	0	0	0	na	na
gjd2b	gjd2b	Q7ZV96	Q7ZV96	5|12	6|13	-	8.5	0.836302	0.77084	0	0	0	na	na
gjd2b	gjd2b	A0A8M2B1N3	A0A8M2B1N3	1|0	0|0	-	0.5	1.46693	1.39063	0	0	0	na	na
gjd2b	gjd2b	A0A8M1PEP2	A0A8M1PEP2	1|0	3|0	-	0.5	0.627573	0.594932	0	0	0	na	na
gjd2b	gjd2b	A0A8M9P2V3	A0A8M9P2V3	13|0	18|0	-	6.5	0.783406	0.401664	0	0	0	na	na
gjd2b	gjd2b	A0A8M9PGR9	A0A8M9PGR9	1|0	0|0	-	0.5	1.46693	1.39063	0	0	0	na	na
gjd2b	gjd2b	A0A8M6Z7R4	A0A8M6Z7R4	0|1	0|0	-	0.5	1.49388	1.40988	0	0	0	na	na
gjd2b	gjd2b	A0A8M2BAK4	A0A8M2BAK4	8|0	11|1	-	4	0.731544	0.449619	0	0	0	na	na
gjd2b	gjd2b	A0A8M2BAK7	A0A8M2BAK7	0|1	0|0	-	0.5	1.49388	1.40988	0	0	0	na	na
gjd2b	gjd2b	A0A8M1P3R3	A0A8M1P3R3	568|597	714|683	-	582.5	0.792402	0.791296	0	0	0	na	na
gjd2b	gjd2b	F1Q8W0	F1Q8W0	0|1	0|0	-	0.5	1.49388	1.40988	0	0	0	na	na
gjd2b	gjd2b	Q66L51	Q66L51	1|1	0|0	-	1	1.96081	1.96062	0	0	0	na	na
gjd2b	gjd2b	A0A8N7UVD6	A0A8N7UVD6	1|0	0|0	-	0.5	1.46693	1.39063	0	0	0	na	na
gjd2b	gjd2b	A0A8M2B4V0	A0A8M2B4V0	1|0	1|0	-	0.5	1.0146	0.961828	0	0	0	na	na
gjd2b	gjd2b	A0A8M9Q884	A0A8M9Q884	1|0	0|0	-	0.5	1.46693	1.39063	0	0	0	na	na
gjd2b	gjd2b	A0A8M1RI39	A0A8M1RI39	1|0	1|0	-	0.5	1.0146	0.961828	0	0	0	na	na
gjd2b	gjd2b	A0A8M9QG93	A0A8M9QG93	0|1	0|0	-	0.5	1.49388	1.40988	0	0	0	na	na
gjd2b	gjd2b	A0A8M1P2D8	A0A8M1P2D8	39|60	44|43	-	49.5	1.08323	1.0532	0	0	0	na	na
gjd2b	gjd2b	A0A8M1NG70	A0A8M1NG70	1|0	0|0	-	0.5	1.46693	1.39063	0	0	0	na	na
gjd2b	gjd2b	A0A8M1NBR1	A0A8M1NBR1	6|1	13|1	-	3.5	0.583238	0.49192	0	0	0	na	na
gjd2b	gjd2b	A0A8M1NBR4	A0A8M1NBR4	16|1	21|3	-	8.5	0.742745	0.466393	0	0	0	na	na
gjd2b	gjd2b	A0A8M9PZ95	A0A8M9PZ95	1|0	0|0	-	0.5	1.46693	1.39063	0	0	0	na	na
gjd2b	gjd2b	A0A8M2BBW5	A0A8M2BBW5	9|0	11|0	-	4.5	0.881152	0.519426	0	0	0	na	na
gjd2b	gjd2b	A0A8M2BI26	A0A8M2BI26	12|15	12|14	-	13.5	0.978577	0.970422	0	0	0	na	na
gjd2b	gjd2b	A0A8N7TAJ3	A0A8N7TAJ3	0|1	0|1	-	0.5	0.952026	0.898494	0	0	0	na	na
gjd2b	gjd2b	A0A8N7T7T2	A0A8N7T7T2	1|0	0|0	-	0.5	1.46693	1.39063	0	0	0	na	na
gjd2b	gjd2b	A0A8M9PM53	A0A8M9PM53	1|0	0|0	-	0.5	1.46693	1.39063	0	0	0	na	na
gjd2b	gjd2b	A0A8M1N673	A0A8M1N673	1|0	0|0	-	0.5	1.46693	1.39063	0	0	0	na	na
gjd2b	gjd2b	A0A8M9Q9J2	A0A8M9Q9J2	0|1	0|0	-	0.5	1.49388	1.40988	0	0	0	na	na
gjd2b	gjd2b	Q8JGR4	Q8JGR4	5|9	6|8	-	7	0.945476	0.910026	0	0	0	na	na
gjd2b	gjd2b	P61485	P61485	2|6	7|4	-	4	0.765491	0.696665	0	0	0	na	na
gjd2b	gjd2b	A0A8M2B9P5	A0A8M2B9P5	0|1	0|0	-	0.5	1.49388	1.40988	0	0	0	na	na
gjd2b	gjd2b	Q6Q415	Q6Q415	6|9	6|11	-	7.5	0.829988	0.813341	0	0	0	na	na
gjd2b	gjd2b	Q7SZE3	Q7SZE3	1|0	0|0	-	0.5	1.46693	1.39063	0	0	0	na	na
gjd2b	gjd2b	A0A8M1QHD3	A0A8M1QHD3	1|1	1|0	-	1	1.35619	1.35606	0	0	0	na	na
gjd2b	gjd2b	A0A8M9QFT7	A0A8M9QFT7	1|0	1|0	-	0.5	1.0146	0.961828	0	0	0	na	na
gjd2b	gjd2b	A0A8M3AXP5	A0A8M3AXP5	9|9	8|11	-	9	0.891012	0.890731	0	0	0	na	na
gjd2b	gjd2b	A0A8M1P5N6	A0A8M1P5N6	25|14	5|33	-	19.5	0.889883	0.86322	0	0	0	na	na
gjd2b	gjd2b	A0A8M1RHN5	A0A8M1RHN5	1|0	0|0	-	0.5	1.46693	1.39063	0	0	0	na	na
gjd2b	gjd2b	A0A8M9PK80	A0A8M9PK80	203|307	248|284	-	255	0.905576	0.881357	0	0	0	na	na
gjd2b	gjd2b	A0A8M9PVT7	A0A8M9PVT7	1|0	1|0	-	0.5	1.0146	0.961828	0	0	0	na	na
gjd2b	gjd2b	A0A8M2B9K2	A0A8M2B9K2	1|0	0|0	-	0.5	1.46693	1.39063	0	0	0	na	na
gjd2b	gjd2b	Q90Z10	Q90Z10	20|27	27|25	-	23.5	0.868232	0.855772	0	0	0	na	na
gjd2b	gjd2b	A0A8M1NFV6	A0A8M1NFV6	6|17	7|26	-	11.5	0.644728	0.572916	0	0	0	na	na
gjd2b	gjd2b	A0A8M1RHP2	A0A8M1RHP2	8|13	10|8	-	10.5	1.11431	1.08155	0	0	0	na	na
gjd2b	gjd2b	A0A8N7T8I4	A0A8N7T8I4	3|2	3|6	-	2.5	0.589065	0.584672	0	0	0	na	na
gjd2b	gjd2b	A0A8M2BL44	A0A8M2BL44	0|1	0|0	-	0.5	1.49388	1.40988	0	0	0	na	na
gjd2b	gjd2b	A0A8M3AZS0	A0A8M3AZS0	0|1	0|0	-	0.5	1.49388	1.40988	0	0	0	na	na
gjd2b	gjd2b	A0A8M2BCY2	A0A8M2BCY2	1|0	0|0	-	0.5	1.46693	1.39063	0	0	0	na	na
gjd2b	gjd2b	A0A8M9PBT4	A0A8M9PBT4	0|1	0|0	-	0.5	1.49388	1.40988	0	0	0	na	na
gjd2b	gjd2b	A0A8N7USZ0	A0A8N7USZ0	0|1	0|0	-	0.5	1.49388	1.40988	0	0	0	na	na
gjd2b	gjd2b	A0A8M9PMV4	A0A8M9PMV4	1|0	0|0	-	0.5	1.46693	1.39063	0	0	0	na	na
gjd2b	gjd2b	A0A8M1PA27	A0A8M1PA27	0|1	0|0	-	0.5	1.49388	1.40988	0	0	0	na	na
gjd2b	gjd2b	Q6IQC7	Q6IQC7	0|1	0|0	-	0.5	1.49388	1.40988	0	0	0	na	na
gjd2b	gjd2b	A0A8M1P913	A0A8M1P913	0|1	0|0	-	0.5	1.49388	1.40988	0	0	0	na	na
gjd2b	gjd2b	A1L2G3	A1L2G3	1|0	0|0	-	0.5	1.46693	1.39063	0	0	0	na	na
gjd2b	gjd2b	A0A8M1PF58	A0A8M1PF58	0|1	0|0	-	0.5	1.49388	1.40988	0	0	0	na	na
gjd2b	gjd2b	A0A8M6YUK6	A0A8M6YUK6	1|0	0|0	-	0.5	1.46693	1.39063	0	0	0	na	na
gjd2b	gjd2b	A0A8M1P8U4	A0A8M1P8U4	0|9	0|12	-	4.5	0.695401	0.401641	0	0	0	na	na
gjd2b	gjd2b	A0A8M9P3E4	A0A8M9P3E4	1|0	0|0	-	0.5	1.46693	1.39063	0	0	0	na	na
gjd2b	gjd2b	A0A8M1N8W9	A0A8M1N8W9	8|6	7|9	-	7	0.832907	0.828707	0	0	0	na	na
gjd2b	gjd2b	A0A8M1PHV5	A0A8M1PHV5	1|0	1|0	-	0.5	1.0146	0.961828	0	0	0	na	na
gjd2b	gjd2b	A0A8M1NJ99	A0A8M1NJ99	1|0	0|0	-	0.5	1.46693	1.39063	0	0	0	na	na
gjd2b	gjd2b	A0A8M3BCZ5	A0A8M3BCZ5	0|1	0|0	-	0.5	1.49388	1.40988	0	0	0	na	na
gjd2b	gjd2b	A0A8M2BFB6	A0A8M2BFB6	0|1	1|0	-	0.5	1.03324	0.975141	0	0	0	na	na
gjd2b	gjd2b	Q8JHJ1	Q8JHJ1	11|22	24|25	-	16.5	0.655705	0.617355	0	0	0	na	na
gjd2b	gjd2b	A0A8M1NDA0	A0A8M1NDA0	7|10	7|7	-	8.5	1.13602	1.11717	0	0	0	na	na
gjd2b	gjd2b	A0A8M3BBK8	A0A8M3BBK8	1|0	1|0	-	0.5	1.0146	0.961828	0	0	0	na	na
gjd2b	gjd2b	A0A8M9PD90	A0A8M9PD90	1|0	0|0	-	0.5	1.46693	1.39063	0	0	0	na	na
gjd2b	gjd2b	A0A8M9QAS2	A0A8M9QAS2	1|0	4|0	-	0.5	0.527049	0.499637	0	0	0	na	na
gjd2b	gjd2b	A0A8M1PHD3	A0A8M1PHD3	1|0	0|0	-	0.5	1.46693	1.39063	0	0	0	na	na
gjd2b	gjd2b	A0A8N7TEC8	A0A8N7TEC8	38|16	49|18	-	27	0.805236	0.748302	0	0	0	na	na
gjd2b	gjd2b	A0A8M1NAS3	A0A8M1NAS3	4|2	4|3	-	3	0.858534	0.835874	0	0	0	na	na
gjd2b	gjd2b	A0A8M9QBN0	A0A8M9QBN0	0|1	0|0	-	0.5	1.49388	1.40988	0	0	0	na	na
gjd2b	gjd2b	A0A8M9PAY2	A0A8M9PAY2	8|0	10|0	-	4	0.867578	0.533228	0	0	0	na	na
gjd2b	gjd2b	A0A8M9PXD6	A0A8M9PXD6	1|0	1|0	-	0.5	1.0146	0.961828	0	0	0	na	na
gjd2b	gjd2b	A0A8M1QL44	A0A8M1QL44	0|1	0|0	-	0.5	1.49388	1.40988	0	0	0	na	na
gjd2b	gjd2b	A0A8M1N4B9	A0A8M1N4B9	1|0	0|0	-	0.5	1.46693	1.39063	0	0	0	na	na
gjd2b	gjd2b	A0A8M1N2E8	A0A8M1N2E8	1|0	2|0	-	0.5	0.775479	0.735145	0	0	0	na	na
gjd2b	gjd2b	A0A8M9PYW7	A0A8M9PYW7	6|1	11|0	-	3.5	0.727545	0.613632	0	0	0	na	na
gjd2b	gjd2b	Q8UVJ6	Q8UVJ6	1|0	0|0	-	0.5	1.46693	1.39063	0	0	0	na	na
gjd2b	gjd2b	A0A8M9Q0Y7	A0A8M9Q0Y7	0|1	0|0	-	0.5	1.49388	1.40988	0	0	0	na	na
gjd2b	gjd2b	A0A8M1NF66	A0A8M1NF66	0|1	0|0	-	0.5	1.49388	1.40988	0	0	0	na	na
gjd2b	gjd2b	A0A8M1MZZ4	A0A8M1MZZ4	7|7	8|8	-	7	0.847126	0.846874	0	0	0	na	na
gjd2b	gjd2b	A0A8M9PBH8	A0A8M9PBH8	0|1	0|0	-	0.5	1.49388	1.40988	0	0	0	na	na
gjd2b	gjd2b	A0A8M6Z698	A0A8M6Z698	0|1	0|0	-	0.5	1.49388	1.40988	0	0	0	na	na
gjd2b	gjd2b	A0A8M2BK69	A0A8M2BK69	0|1	0|0	-	0.5	1.49388	1.40988	0	0	0	na	na
gjd2b	gjd2b	F1R237	F1R237	0|1	0|0	-	0.5	1.49388	1.40988	0	0	0	na	na
gjd2b	gjd2b	A0A8M1PAR7	A0A8M1PAR7	1|0	1|0	-	0.5	1.0146	0.961828	0	0	0	na	na
gjd2b	gjd2b	A0A8M1N119	A0A8M1N119	1|2	4|2	-	1.5	0.62594	0.611688	0	0	0	na	na
gjd2b	gjd2b	Q6DRJ4	Q6DRJ4	0|1	0|1	-	0.5	0.952026	0.898494	0	0	0	na	na
gjd2b	gjd2b	A0A8N7TEV8	A0A8N7TEV8	1|0	0|0	-	0.5	1.46693	1.39063	0	0	0	na	na
gjd2b	gjd2b	A0A8M1MZT1	A0A8M1MZT1	1|0	1|0	-	0.5	1.0146	0.961828	0	0	0	na	na
gjd2b	gjd2b	A0A8M1PZE1	A0A8M1PZE1	39|39	56|69	-	39	0.589711	0.589491	0	0	0	na	na
gjd2b	gjd2b	A0A8M2B5R2	A0A8M2B5R2	1|0	0|0	-	0.5	1.46693	1.39063	0	0	0	na	na
gjd2b	gjd2b	A0A8M2BEI2	A0A8M2BEI2	1|0	0|0	-	0.5	1.46693	1.39063	0	0	0	na	na
gjd2b	gjd2b	A0A8M1P8I7	A0A8M1P8I7	0|1	0|0	-	0.5	1.49388	1.40988	0	0	0	na	na
gjd2b	gjd2b	Q9W6A9	Q9W6A9	10|1	12|4	-	5.5	0.714446	0.525506	0	0	0	na	na
gjd2b	gjd2b	A0A8M9PZJ6	A0A8M9PZJ6	0|1	0|0	-	0.5	1.49388	1.40988	0	0	0	na	na
gjd2b	gjd2b	A0A8M1N060	A0A8M1N060	1|0	0|0	-	0.5	1.46693	1.39063	0	0	0	na	na
gjd2b	gjd2b	A0A8M1N4M2	A0A8M1N4M2	1|0	0|1	-	0.5	0.93485	0.886228	0	0	0	na	na
gjd2b	gjd2b	A0A8M6YYK0	A0A8M6YYK0	0|1	0|0	-	0.5	1.49388	1.40988	0	0	0	na	na
gjd2b	gjd2b	A0A8M1NFK9	A0A8M1NFK9	1|0	0|0	-	0.5	1.46693	1.39063	0	0	0	na	na
gjd2b	gjd2b	C5J7W8	C5J7W8	1|1	0|0	-	1	1.96081	1.96062	0	0	0	na	na
gjd2b	gjd2b	A0A8N7UZ62	A0A8N7UZ62	0|1	0|0	-	0.5	1.49388	1.40988	0	0	0	na	na
gjd2b	gjd2b	A0A8M1PCB5	A0A8M1PCB5	0|1	1|0	-	0.5	1.03324	0.975141	0	0	0	na	na
gjd2b	gjd2b	A0A8M1NYQ3	A0A8M1NYQ3	18|11	10|11	-	14.5	1.2661	1.24044	0	0	0	na	na
gjd2b	gjd2b	A0A8M1N2F7	A0A8M1N2F7	1|1	3|2	-	1	0.564135	0.564081	0	0	0	na	na
gjd2b	gjd2b	A0A8M3B3V5	A0A8M3B3V5	0|1	0|0	-	0.5	1.49388	1.40988	0	0	0	na	na
gjd2b	gjd2b	A0A8M1N7Z8	A0A8M1N7Z8	40|4	57|8	-	22	0.69926	0.445023	0	0	0	na	na
gjd2b	gjd2b	A0A8M1RN71	A0A8M1RN71	0|1	0|0	-	0.5	1.49388	1.40988	0	0	0	na	na
gjd2b	gjd2b	Q7ZUV1	Q7ZUV1	1|0	1|0	-	0.5	1.0146	0.961828	0	0	0	na	na
gjd2b	gjd2b	A0A8M6YYK8	A0A8M6YYK8	1|0	0|0	-	0.5	1.46693	1.39063	0	0	0	na	na
gjd2b	gjd2b	Q6DEH3	Q6DEH3	1|0	0|0	-	0.5	1.46693	1.39063	0	0	0	na	na
gjd2b	gjd2b	A0A8M1NFY8	A0A8M1NFY8	0|2	4|3	-	1	0.442633	0.384115	0	0	0	na	na
gjd2b	gjd2b	A0A8M1P3T0	A0A8M1P3T0	8|0	12|0	-	4	0.745753	0.458353	0	0	0	na	na
gjd2b	gjd2b	A0JMG1	A0JMG1	1|0	0|0	-	0.5	1.46693	1.39063	0	0	0	na	na
gjd2b	gjd2b	A0A8M1PHS9	A0A8M1PHS9	0|1	0|0	-	0.5	1.49388	1.40988	0	0	0	na	na
gjd2b	gjd2b	A0A8M2B599	A0A8M2B599	1|1	0|0	-	1	1.96081	1.96062	0	0	0	na	na
gjd2b	gjd2b	A0A8M1RFW3	A0A8M1RFW3	0|1	0|0	-	0.5	1.49388	1.40988	0	0	0	na	na
gjd2b	gjd2b	A0A8M9PU72	A0A8M9PU72	18|0	24|0	-	9	0.803841	0.360703	0	0	0	na	na
gjd2b	gjd2b	A0A8M1P3F0	A0A8M1P3F0	1|0	0|1	-	0.5	0.93485	0.886228	0	0	0	na	na
gjd2b	gjd2b	A0A8M9PPQ8	A0A8M9PPQ8	3|0	6|0	-	1.5	0.653288	0.530558	0	0	0	na	na
gjd2b	gjd2b	A0A8M3AYT6	A0A8M3AYT6	1|0	0|0	-	0.5	1.46693	1.39063	0	0	0	na	na
gjd2b	gjd2b	A0A8M1RF93	A0A8M1RF93	1|0	0|0	-	0.5	1.46693	1.39063	0	0	0	na	na
gjd2b	gjd2b	A0A8M3AS01	A0A8M3AS01	1|0	0|0	-	0.5	1.46693	1.39063	0	0	0	na	na
gjd2b	gjd2b	A0A8M1PQQ4	A0A8M1PQQ4	9|2	14|3	-	5.5	0.691712	0.591127	0	0	0	na	na
gjd2b	gjd2b	A0A8M1RNS0	A0A8M1RNS0	1|0	0|0	-	0.5	1.46693	1.39063	0	0	0	na	na
gjd2b	gjd2b	F1QFU0	F1QFU0	1|0	0|1	-	0.5	0.93485	0.886228	0	0	0	na	na
gjd2b	gjd2b	Q7ZWJ4	Q7ZWJ4	13|5	10|9	-	9	0.901596	0.834905	0	0	0	na	na
gjd2b	gjd2b	Q7ZWJ7	Q7ZWJ7	17|26	25|30	-	21.5	0.745327	0.726192	0	0	0	na	na
gjd2b	gjd2b	A0A8M2BDQ2	A0A8M2BDQ2	1|0	0|0	-	0.5	1.46693	1.39063	0	0	0	na	na
gjd2b	gjd2b	B2ZFP3	B2ZFP3	1|0	0|0	-	0.5	1.46693	1.39063	0	0	0	na	na
gjd2b	gjd2b	A0A8M6Z2N7	A0A8M6Z2N7	1|0	2|0	-	0.5	0.775479	0.735145	0	0	0	na	na
gjd2b	gjd2b	P62247	P62247	21|16	26|22	-	18.5	0.74494	0.741074	0	0	0	na	na
gjd2b	gjd2b	A0A8M9P3G8	A0A8M9P3G8	1|0	0|0	-	0.5	1.46693	1.39063	0	0	0	na	na
gjd2b	gjd2b	A0A8M9PQC3	A0A8M9PQC3	5|7	2|9	-	6	0.968311	0.954994	0	0	0	na	na
gjd2b	gjd2b	A0A8N7T8D0	A0A8N7T8D0	1|0	1|0	-	0.5	1.0146	0.961828	0	0	0	na	na
gjd2b	gjd2b	A0A8M1N7L1	A0A8M1N7L1	1|0	0|0	-	0.5	1.46693	1.39063	0	0	0	na	na
gjd2b	gjd2b	Q5BJB7	Q5BJB7	1|0	0|0	-	0.5	1.46693	1.39063	0	0	0	na	na
gjd2b	gjd2b	A0A8N7TDQ0	A0A8N7TDQ0	0|1	1|0	-	0.5	1.03324	0.975141	0	0	0	na	na
gjd2b	gjd2b	A0A8M9QFN8	A0A8M9QFN8	1|0	2|0	-	0.5	0.775479	0.735145	0	0	0	na	na
gjd2b	gjd2b	A0A8M9PCE0	A0A8M9PCE0	1|0	0|0	-	0.5	1.46693	1.39063	0	0	0	na	na
gjd2b	gjd2b	A0A8M9QB40	A0A8M9QB40	1|0	2|0	-	0.5	0.775479	0.735145	0	0	0	na	na
gjd2b	gjd2b	Q6P5L3	Q6P5L3	18|22	28|22	-	20	0.779483	0.773719	0	0	0	na	na
gjd2b	gjd2b	A0A8M1NZL3	A0A8M1NZL3	0|1	0|0	-	0.5	1.49388	1.40988	0	0	0	na	na
gjd2b	gjd2b	Q6P6X9	Q6P6X9	0|1	0|0	-	0.5	1.49388	1.40988	0	0	0	na	na
gjd2b	gjd2b	A0A8M9QH85	A0A8M9QH85	0|1	0|0	-	0.5	1.49388	1.40988	0	0	0	na	na
gjd2b	gjd2b	A0A8M1QQN3	A0A8M1QQN3	1|0	0|0	-	0.5	1.46693	1.39063	0	0	0	na	na
gjd2b	gjd2b	A0A8N7TF98	A0A8N7TF98	0|1	0|0	-	0.5	1.49388	1.40988	0	0	0	na	na
gjd2b	gjd2b	A0A8M1NT70	A0A8M1NT70	0|1	0|0	-	0.5	1.49388	1.40988	0	0	0	na	na
gjd2b	gjd2b	A0A8M9Q131	A0A8M9Q131	0|1	0|0	-	0.5	1.49388	1.40988	0	0	0	na	na
gjd2b	gjd2b	A0A8M9Q1D2	A0A8M9Q1D2	1|0	0|0	-	0.5	1.46693	1.39063	0	0	0	na	na
gjd2b	gjd2b	A0A8M9P8P8	A0A8M9P8P8	0|1	0|0	-	0.5	1.49388	1.40988	0	0	0	na	na
gjd2b	gjd2b	A0A8N7TE24	A0A8N7TE24	0|1	1|0	-	0.5	1.03324	0.975141	0	0	0	na	na
gjd2b	gjd2b	A0A8M9PUM3	A0A8M9PUM3	0|1	0|0	-	0.5	1.49388	1.40988	0	0	0	na	na
gjd2b	gjd2b	Q6DRP2	Q6DRP2	10|6	14|7	-	8	0.769006	0.75384	0	0	0	na	na
gjd2b	gjd2b	F1QRC1	F1QRC1	0|1	0|0	-	0.5	1.49388	1.40988	0	0	0	na	na
gjd2b	gjd2b	A0A8M1PRX4	A0A8M1PRX4	1|0	0|0	-	0.5	1.46693	1.39063	0	0	0	na	na
gjd2b	gjd2b	A0A8N7TDH5	A0A8N7TDH5	1|0	0|0	-	0.5	1.46693	1.39063	0	0	0	na	na
gjd2b	gjd2b	A0A8M1PGK6	A0A8M1PGK6	1|0	0|0	-	0.5	1.46693	1.39063	0	0	0	na	na
gjd2b	gjd2b	A0A8N7TDH1	A0A8N7TDH1	1|0	0|0	-	0.5	1.46693	1.39063	0	0	0	na	na
gjd2b	gjd2b	A0A8N7T8Q4	A0A8N7T8Q4	4|3	11|4	-	3.5	0.531662	0.529564	0	0	0	na	na
gjd2b	gjd2b	A0A8M1RLP4	A0A8M1RLP4	0|1	0|0	-	0.5	1.49388	1.40988	0	0	0	na	na
gjd2b	gjd2b	A0A8M1NLI6	A0A8M1NLI6	16|20	33|22	-	18	0.64988	0.644265	0	0	0	na	na
gjd2b	gjd2b	A0A8N7T863	A0A8N7T863	1|0	0|0	-	0.5	1.46693	1.39063	0	0	0	na	na
gjd2b	gjd2b	A0A8M9P5C7	A0A8M9P5C7	1|0	0|0	-	0.5	1.46693	1.39063	0	0	0	na	na
gjd2b	gjd2b	A0A8M9PGJ4	A0A8M9PGJ4	0|1	0|0	-	0.5	1.49388	1.40988	0	0	0	na	na
gjd2b	gjd2b	A0A8M1RR82	A0A8M1RR82	0|1	0|1	-	0.5	0.952026	0.898494	0	0	0	na	na
gjd2b	gjd2b	A0A8M3B7L2	A0A8M3B7L2	1|0	0|0	-	0.5	1.46693	1.39063	0	0	0	na	na
gjd2b	gjd2b	A0A8M9PK40	A0A8M9PK40	1|0	0|0	-	0.5	1.46693	1.39063	0	0	0	na	na
gjd2b	gjd2b	A0A0R4IYX6	A0A0R4IYX6	0|1	0|0	-	0.5	1.49388	1.40988	0	0	0	na	na
gjd2b	gjd2b	A0A8M9PB08	A0A8M9PB08	1|0	0|0	-	0.5	1.46693	1.39063	0	0	0	na	na
gjd2b	gjd2b	Q66HV4	Q66HV4	1|0	0|0	-	0.5	1.46693	1.39063	0	0	0	na	na
gjd2b	gjd2b	A0A8M1PGB4	A0A8M1PGB4	1|0	0|0	-	0.5	1.46693	1.39063	0	0	0	na	na
gjd2b	gjd2b	A0A8N7UZL1	A0A8N7UZL1	270|299	277|322	-	284.5	0.892706	0.889943	0	0	0	na	na
gjd2b	gjd2b	A0A8M9PHJ3	A0A8M9PHJ3	1|0	0|0	-	0.5	1.46693	1.39063	0	0	0	na	na
gjd2b	gjd2b	Q5RFV8	Q5RFV8	6|0	12|0	-	3	0.598686	0.40468	0	0	0	na	na
gjd2b	gjd2b	A0A8M1REA6	A0A8M1REA6	1|0	0|0	-	0.5	1.46693	1.39063	0	0	0	na	na
gjd2b	gjd2b	A0A8M3BC60	A0A8M3BC60	1|0	0|0	-	0.5	1.46693	1.39063	0	0	0	na	na
gjd2b	gjd2b	A0A8M3AN15	A0A8M3AN15	3|0	9|0	-	1.5	0.47897	0.388988	0	0	0	na	na
gjd2b	gjd2b	A0A8M2BKM4	A0A8M2BKM4	0|1	0|0	-	0.5	1.49388	1.40988	0	0	0	na	na
gjd2b	gjd2b	A0A8M1P0Q5	A0A8M1P0Q5	0|1	0|0	-	0.5	1.49388	1.40988	0	0	0	na	na
gjd2b	gjd2b	A0A8M2BB52	A0A8M2BB52	2|1	4|4	-	1.5	0.479797	0.471852	0	0	0	na	na
gjd2b	gjd2b	A0A8M2BII8	A0A8M2BII8	0|1	0|0	-	0.5	1.49388	1.40988	0	0	0	na	na
gjd2b	gjd2b	A0A8M3AQF7	A0A8M3AQF7	0|1	0|0	-	0.5	1.49388	1.40988	0	0	0	na	na
gjd2b	gjd2b	A0A8M9PQF2	A0A8M9PQF2	0|1	0|0	-	0.5	1.49388	1.40988	0	0	0	na	na
gjd2b	gjd2b	A0A8M2B5E4	A0A8M2B5E4	0|1	0|0	-	0.5	1.49388	1.40988	0	0	0	na	na
gjd2b	gjd2b	A0A8M2BBN8	A0A8M2BBN8	0|1	0|0	-	0.5	1.49388	1.40988	0	0	0	na	na
gjd2b	gjd2b	A0A8M9P088	A0A8M9P088	1|0	2|0	-	0.5	0.775479	0.735145	0	0	0	na	na
gjd2b	gjd2b	Q6PBY0	Q6PBY0	1|0	1|0	-	0.5	1.0146	0.961828	0	0	0	na	na
gjd2b	gjd2b	Q6PBY1	Q6PBY1	7|1	8|3	-	4	0.75906	0.616926	0	0	0	na	na
gjd2b	gjd2b	A0A8M3ANA9	A0A8M3ANA9	0|1	0|0	-	0.5	1.49388	1.40988	0	0	0	na	na
gjd2b	gjd2b	A0A8M1PCH6	A0A8M1PCH6	1|0	1|0	-	0.5	1.0146	0.961828	0	0	0	na	na
gjd2b	gjd2b	A0A8M9QH00	A0A8M9QH00	1|1	0|0	-	1	1.96081	1.96062	0	0	0	na	na
gjd2b	gjd2b	A0A8M3AQW8	A0A8M3AQW8	0|1	0|0	-	0.5	1.49388	1.40988	0	0	0	na	na
gjd2b	gjd2b	A0A8M1Q277	A0A8M1Q277	0|1	0|0	-	0.5	1.49388	1.40988	0	0	0	na	na
gjd2b	gjd2b	F1QDI9	F1QDI9	0|1	1|0	-	0.5	1.03324	0.975141	0	0	0	na	na
gjd2b	gjd2b	Q66HX8	Q66HX8	1|0	0|2	-	0.5	0.68602	0.650339	0	0	0	na	na
gjd2b	gjd2b	Q7ZV82	Q7ZV82	4|4	5|2	-	4	1.10894	1.10867	0	0	0	na	na
gjd2b	gjd2b	A0A8N7UVM4	A0A8N7UVM4	1|0	1|0	-	0.5	1.0146	0.961828	0	0	0	na	na
gjd2b	gjd2b	A0A8M1N9L7	A0A8M1N9L7	87|132	75|103	-	109.5	1.14781	1.11703	0	0	0	na	na
gjd2b	gjd2b	A0A8M9QL68	A0A8M9QL68	0|1	0|0	-	0.5	1.49388	1.40988	0	0	0	na	na
gjd2b	gjd2b	A0A8M3B874	A0A8M3B874	1|0	0|0	-	0.5	1.46693	1.39063	0	0	0	na	na
gjd2b	gjd2b	A0A8M2B5H2	A0A8M2B5H2	1|0	0|0	-	0.5	1.46693	1.39063	0	0	0	na	na
gjd2b	gjd2b	A0A8M2BL73	A0A8M2BL73	1|0	0|0	-	0.5	1.46693	1.39063	0	0	0	na	na
gjd2b	gjd2b	A0A8M1PIK4	A0A8M1PIK4	1|0	2|0	-	0.5	0.775479	0.735145	0	0	0	na	na
gjd2b	gjd2b	A0A8M9PS81	A0A8M9PS81	0|1	0|2	-	0.5	0.698624	0.659341	0	0	0	na	na
gjd2b	gjd2b	A0A8M2B6D3	A0A8M2B6D3	7|12	12|10	-	9.5	0.846664	0.817382	0	0	0	na	na
gjd2b	gjd2b	A0A8M1NUX0	A0A8M1NUX0	28|8	35|11	-	18	0.788342	0.679912	0	0	0	na	na
gjd2b	gjd2b	A0A8M2BHQ8	A0A8M2BHQ8	1|0	0|0	-	0.5	1.46693	1.39063	0	0	0	na	na
gjd2b	gjd2b	A0A8M1P1T0	A0A8M1P1T0	3|5	5|2	-	4	1.11512	1.08794	0	0	0	na	na
gjd2b	gjd2b	A0A8M6Z2B4	A0A8M6Z2B4	1|0	0|0	-	0.5	1.46693	1.39063	0	0	0	na	na
gjd2b	gjd2b	A0A8M2B3V0	A0A8M2B3V0	1|0	0|0	-	0.5	1.46693	1.39063	0	0	0	na	na
gjd2b	gjd2b	Q9PU58	Q9PU58	1|0	1|0	-	0.5	1.0146	0.961828	0	0	0	na	na
gjd2b	gjd2b	A0A8M9Q6X5	A0A8M9Q6X5	1|0	0|0	-	0.5	1.46693	1.39063	0	0	0	na	na
