# Supplementary material for: Uncovering the electrical synapse proteome in retinal neurons via in vivo proximity labeling
Source: eLife. 2026 May 20;14:RP105935. doi: 10.7554/eLife.105935 (PMC13189625; doi:10.7554/eLife.105935)
Supplement: Supplementary file 2. [file elife-105935-supp2.xlsx]

## Sheet: AII Cx36 proximity proteome all
Full report of proteins captured in two experiments targeting Cx36 in AII amacrine cells. Data are sorted by (peak area AII/peak area control), #peptides in AII samples and peak area AII
	Experiments included
	AII-1 Cx36-EGFP mouse retina injected with AAV-Hkamac-BLITZ - experiment 1
	Cntrl-1 WT (C57Bl6J) mouse retina injected with AAV-Hkamac-BLITZ - experiment 1
	AII-2 Cx36-EGFP mouse retina injected with AAV-Hkamac-BLITZ - experiment 2
	Cntrl-2 WT (C57Bl6J) mouse retina injected with AAV-Hkamac-BLITZ - experiment 2
Accession	Description	Σ# Unique Peptides AII-1	Area AII-1	Area Cntrl1	A/B AII-1	Score AII-1	Coverage AII-1	# Peptides AII-1	# PSM AII-1	Score Cntrl1	Coverage Cntrl1	# Peptides Cntrl1	# PSM Cntrl1	Σ# Unique Peptides AII-2	Σ# Peptides AII-2	Area AII-2	Area Cntrl2	A/B AII-2	Score AII-2	Coverage AII-2	# Peptides AII-2	# PSM AII-2	Score Cntrl2	Coverage Cntrl2	# Peptides Cntrl2	# PSM Cntrl2	Mean A/B	Mean pep AII	Mean area AII
Q64331	Unconventional myosin-VI OS=Mus musculus OX=10090 GN=Myo6 PE=1 SV=1 - [MYO6_MOUSE]	35	9.15492e+07	3.05814e+07	2.99363	96.1823	27.19	33	40	54.9923	19.92	21	22	39	39	2.85435e+08	4.66784e+07	6.11493	151.877	33.83	39	59	47.0102	14.23	16	18	4.55428	36	1.88492e+08
P39447	Tight junction protein ZO-1 OS=Mus musculus OX=10090 GN=Tjp1 PE=1 SV=2 - [ZO1_MOUSE]	24	3.03907e+07	4.91854e+06	6.17882	55.4594	20.17	23	23	32.2367	9.51	12	12	35	35	1.7952e+08	4.30588e+06	41.6918	127.998	30.83	35	48	3.19176	0.8	1	1	23.9353	29	1.04955e+08
G3X9J0	Signal-induced proliferation-associated 1-like protein 3 OS=Mus musculus OX=10090 GN=Sipa1l3 PE=1 SV=1 - [SI1L3_MOUSE]	12	1.81314e+07	0		26.7727	8.56	12	13					40	42	7.9722e+07	1.96165e+06	40.6404	111.687	33.33	41	44	6.8426	2.36	3	3	40.6404	26.5	4.89267e+07
Q7TSJ2	Microtubule-associated protein 6 OS=Mus musculus OX=10090 GN=Map6 PE=1 SV=2 - [MAP6_MOUSE]	19	1.95724e+07	2.23186e+06	8.76953	47.398	31.02	17	17	13.5636	12.47	6	6	26	26	1.14405e+08	9.94805e+06	11.5002	86.7843	44.92	26	33	12.7371	8.94	5	5	10.1349	21.5	6.69885e+07
Q99104	Unconventional myosin-Va OS=Mus musculus OX=10090 GN=Myo5a PE=1 SV=2 - [MYO5A_MOUSE]	38	3.76969e+07	2.76972e+07	1.36104	90.4518	24.66	35	38	65.636	17.81	24	27	8	8	1.01925e+07	1.92835e+06	5.28564	17.1398	4.43	7	9	2.87146	0.81	1	1	3.32334	21	2.39447e+07
Q60902	Epidermal growth factor receptor substrate 15-like 1 OS=Mus musculus OX=10090 GN=Eps15l1 PE=1 SV=3 - [EP15R_MOUSE]	11	1.81849e+07	0		23.0374	14.33	11	11					14	14	5.65825e+07	0		38.788	20.51	14	16					#DIV/0!	12.5	3.73837e+07
Q9Z0R4	Intersectin-1 OS=Mus musculus OX=10090 GN=Itsn1 PE=1 SV=2 - [ITSN1_MOUSE]	11	1.21563e+07	0		33.2061	8.81	11	13					11	11	5.70661e+07	0		30.3718	9.28	11	11					#DIV/0!	11	3.46112e+07
O54851	Gap junction delta-2 protein OS=Mus musculus OX=10090 GN=Gjd2 PE=1 SV=2 - [CXD2_MOUSE]	8	2.49351e+08	0		28.0449	27.73	8	12					13	13	1.3027e+09	0		72.4132	38.01	13	27					#DIV/0!	10.5	7.76023e+08
Q9Z0U1	Tight junction protein ZO-2 OS=Mus musculus OX=10090 GN=Tjp2 PE=1 SV=2 - [ZO2_MOUSE]	8	9.7129e+06	1.69509e+06	5.73001	21.8331	11.23	9	9	5.28471	1.97	2	2	12	12	2.43308e+07	540335	45.0291	24.8498	10.54	12	12	0	1.03	1	1	25.3795	10.5	1.70218e+07
Q8R1A4	Dedicator of cytokinesis protein 7 OS=Mus musculus OX=10090 GN=Dock7 PE=1 SV=3 - [DOCK7_MOUSE]	5	6.10289e+06	0		16.3809	3.85	5	6					14	14	1.50354e+07	0		38.4902	7.7	14	17					#DIV/0!	9.5	1.05692e+07
Q80Z38	SH3 and multiple ankyrin repeat domains protein 2 OS=Mus musculus OX=10090 GN=Shank2 PE=1 SV=2 - [SHAN2_MOUSE]	8	6.73366e+06	1232574	5.46309	20.5948	8.27	7	7	6.2624	2.64	2	2	11	11	3.30972e+07	9.26253e+06	3.57324	25.8991	9.62	11	12	7.05657	2.98	3	3	4.51816	9	1.99154e+07
Q7M6Y3	Phosphatidylinositol-binding clathrin assembly protein OS=Mus musculus OX=10090 GN=Picalm PE=1 SV=1 - [PICAL_MOUSE]													6	8	5.91224e+07	0		23.6956	15.76	8	9					#DIV/0!	8	5.91224e+07
Q61001	Laminin subunit alpha-5 OS=Mus musculus OX=10090 GN=Lama5 PE=1 SV=4 - [LAMA5_MOUSE]	4	4.73959e+06	0		12.8314	1.88	4	4					11	11	2.1377e+07	0		29.2003	4.17	11	11					#DIV/0!	7.5	1.30583e+07
Q61548	Clathrin coat assembly protein AP180 OS=Mus musculus OX=10090 GN=Snap91 PE=1 SV=1 - [AP180_MOUSE]	7	1.59001e+07	0		20.4355	10.32	7	8					5	7	6.4316e+07	0		22.224	10.65	7	9					#DIV/0!	7	4.0108e+07
Q8K363	ATP-dependent RNA helicase DDX18 OS=Mus musculus OX=10090 GN=Ddx18 PE=1 SV=1 - [DDX18_MOUSE]	5	1.20705e+07	0		10.9463	8.18	5	5																		#DIV/0!	5	1.20705e+07
Q9JKY5	Huntingtin-interacting protein 1-related protein OS=Mus musculus OX=10090 GN=Hip1r PE=1 SV=2 - [HIP1R_MOUSE]	3	4.60992e+06	0		9.41165	4.68	3	3					7	7	10864599	0		17.285	9.46	7	7					#DIV/0!	5	7.73726e+06
Q3UNH4	G protein-regulated inducer of neurite outgrowth 1 OS=Mus musculus OX=10090 GN=Gprin1 PE=1 SV=2 - [GRIN1_MOUSE]	4	2.53909e+06	0		8.29191	5.58	4	4					6	6	1.10106e+07	0		15.0492	8.69	6	6					#DIV/0!	5	6.77487e+06
Q6PHZ2	Calcium/calmodulin-dependent protein kinase type II subunit delta OS=Mus musculus OX=10090 GN=Camk2d PE=1 SV=1 - [KCC2D_MOUSE]													1	4	1.41381e+07	0		4.22025	7.01	4	4					#DIV/0!	4	1.41381e+07
Q923T9	Calcium/calmodulin-dependent protein kinase type II subunit gamma OS=Mus musculus OX=10090 GN=Camk2g PE=1 SV=1 - [KCC2G_MOUSE]													1	4	1.41381e+07	0		3.91946	6.81	4	4					#DIV/0!	4	1.41381e+07
O08599	Syntaxin-binding protein 1 OS=Mus musculus OX=10090 GN=Stxbp1 PE=1 SV=2 - [STXB1_MOUSE]	2	944606	0		5.25436	8.25	2	2					6	6	2.34789e+07	0		14.5483	12.46	6	6					#DIV/0!	4	1.22118e+07
Q5SDA5	Retinal guanylyl cyclase 2 OS=Mus musculus OX=10090 GN=Gucy2f PE=1 SV=1 - [GUC2F_MOUSE]	1	5.0404e+06	0		8.73758	4.15	4	4																		#DIV/0!	4	5.0404e+06
P16546	Spectrin alpha chain, non-erythrocytic 1 OS=Mus musculus OX=10090 GN=Sptan1 PE=1 SV=4 - [SPTN1_MOUSE]	4	3.56331e+06	0		9.71067	2.35	4	4																		#DIV/0!	4	3.56331e+06
Q91VW5	Golgin subfamily A member 4 OS=Mus musculus OX=10090 GN=Golga4 PE=1 SV=2 - [GOGA4_MOUSE]	2	1.29448e+06	0		7.34596	1.74	2	2					5	5	2.05847e+07	0		10.0573	2.77	5	5					#DIV/0!	3.5	1.09396e+07
Q9WTL7	Acyl-protein thioesterase 2 OS=Mus musculus OX=10090 GN=Lypla2 PE=1 SV=1 - [LYPA2_MOUSE]													3	3	3.906e+07	0		4.15279	11.26	3	3					#DIV/0!	3	3.906e+07
Q80VP1	Epsin-1 OS=Mus musculus OX=10090 GN=Epn1 PE=1 SV=3 - [EPN1_MOUSE]	1	1.13679e+07	0		7.60712	4	1	2					5	5	2.88473e+07	0		11.3722	10.43	5	6					#DIV/0!	3	2.01076e+07
Q8C0T5	Signal-induced proliferation-associated 1-like protein 1 OS=Mus musculus OX=10090 GN=Sipa1l1 PE=1 SV=2 - [SI1L1_MOUSE]													1	3	1.63619e+07	0		4.16395	1.57	3	3					#DIV/0!	3	1.63619e+07
Q9DB77	Cytochrome b-c1 complex subunit 2, mitochondrial OS=Mus musculus OX=10090 GN=Uqcrc2 PE=1 SV=1 - [QCR2_MOUSE]													3	3	1.59447e+07	0		7.26516	7.95	3	3					#DIV/0!	3	1.59447e+07
Q9D2V7	Coronin-7 OS=Mus musculus OX=10090 GN=Coro7 PE=1 SV=2 - [CORO7_MOUSE]													3	3	1.4037e+07	0		4.74432	5.1	3	3					#DIV/0!	3	1.4037e+07
P28652	Calcium/calmodulin-dependent protein kinase type II subunit beta OS=Mus musculus OX=10090 GN=Camk2b PE=1 SV=2 - [KCC2B_MOUSE]													1	3	1.30399e+07	0		6.6008	8.12	3	3					#DIV/0!	3	1.30399e+07
Q9WUM4	Coronin-1C OS=Mus musculus OX=10090 GN=Coro1c PE=1 SV=2 - [COR1C_MOUSE]													3	3	1.23775e+07	0		4.86507	6.33	3	3					#DIV/0!	3	1.23775e+07
Q8BMK4	Cytoskeleton-associated protein 4 OS=Mus musculus OX=10090 GN=Ckap4 PE=1 SV=2 - [CKAP4_MOUSE]	4	2.04523e+06	0		10.9282	7.48	3	4	0	2.61	1	1														#DIV/0!	3	2.04523e+06
Q3UHJ0	AP2-associated protein kinase 1 OS=Mus musculus OX=10090 GN=Aak1 PE=1 SV=2 - [AAK1_MOUSE]	3	2.3982e+06	0		8.9847	5.42	3	3					2	2	8.6262e+06	0		4.84863	2.82	2	2					#DIV/0!	2.5	5.5122e+06
Q99P72	Reticulon-4 OS=Mus musculus OX=10090 GN=Rtn4 PE=1 SV=2 - [RTN4_MOUSE]	1	320353	0		2.5908	2.07	1	1					4	4	9.32967e+06	0		11.6861	5.59	4	4					#DIV/0!	2.5	4.82501e+06
B2RQC6	CAD protein OS=Mus musculus OX=10090 GN=Cad PE=1 SV=1 - [PYR1_MOUSE]	1	0	8.84786e+06	0					3.66465	1.75	1	1	5	5	7.64647e+07	1.45063e+06	52.7113	9.95272	3.37	4	5	5.64612	1.08	2	2	26.3557	4	3.82323e+07
Q91ZZ3	Beta-synuclein OS=Mus musculus OX=10090 GN=Sncb PE=1 SV=1 - [SYUB_MOUSE]													3	3	6.56374e+07	4.25809e+06	15.4147	13.2275	27.07	3	4	2.08544	6.77	1	1	15.4147	3	6.56374e+07
P39053	Dynamin-1 OS=Mus musculus OX=10090 GN=Dnm1 PE=1 SV=2 - [DYN1_MOUSE]													3	3	2.69966e+06	216938	12.4444	3.45465	1.73	2	2	2.09311	1.15	1	1	12.4444	2	2.69966e+06
Q6IFX2	Keratin, type I cytoskeletal 42 OS=Mus musculus OX=10090 GN=Krt42 PE=1 SV=1 - [K1C42_MOUSE]	1	1.45503e+08	6.28361e+06	23.156	16.5859	11.28	4	6	5.68395	7.08	2	2	2	7	4.94142e+08	3.79085e+08	1.30351	23.3358	17.48	7	9	19.8868	17.48	7	8	12.2298	5.5	3.19823e+08
P02468	Laminin subunit gamma-1 OS=Mus musculus OX=10090 GN=Lamc1 PE=1 SV=2 - [LAMC1_MOUSE]	4	5.15383e+06	453342	11.3685	8.77025	2.86	3	3	1.91761	0.56	1	1	5	5	1.15628e+07	0		13.1471	4.23	5	5					11.3685	4	8.35829e+06
Q8R1B5	Complexin-3 OS=Mus musculus OX=10090 GN=Cplx3 PE=1 SV=1 - [CPLX3_MOUSE]	1	0	0		3.34563	12.03	1	1					7	7	1.99049e+08	1.95449e+07	10.1842	31.7025	44.94	7	11	4.50279	18.35	2	2	10.1842	4	9.95244e+07
Q01149	Collagen alpha-2(I) chain OS=Mus musculus OX=10090 GN=Col1a2 PE=1 SV=2 - [CO1A2_MOUSE]	7	6.30886e+07	6.42942e+06	9.81248	12.5715	5.39	6	6	5.79754	2.48	3	3	1	1	2.16271e+06	0		2.7769	1.09	1	1					9.81248	3.5	3.26257e+07
Q14AX6	Cyclin-dependent kinase 12 OS=Mus musculus OX=10090 GN=Cdk12 PE=1 SV=2 - [CDK12_MOUSE]	2	1.6761e+07	2.22698e+06	7.52635	6.36262	2.36	3	3	4.96812	1.89	2	2														7.52635	3	1.6761e+07
G5E8P1	Bromodomain-containing protein 1 OS=Mus musculus OX=10090 GN=Brd1 PE=1 SV=1 - [BRD1_MOUSE]	10	1.25731e+07	1.71321e+06	7.33893	21.7208	12.85	9	9	10.2472	7.47	4	4														7.33893	9	1.25731e+07
Q9QZZ4	Unconventional myosin-XV OS=Mus musculus OX=10090 GN=Myo15a PE=1 SV=2 - [MYO15_MOUSE]													1	2	7.18148e+07	0		3.53377	0.57	2	2					#DIV/0!	2	7.18148e+07
B7ZNG0	Kinesin-like protein KIF7 OS=Mus musculus OX=10090 GN=Kif7 PE=1 SV=1 - [KIF7_MOUSE]	1	4.27186e+07	0		2.13669	1.19	2	2																		#DIV/0!	2	4.27186e+07
A2AHJ4	Bromodomain and WD repeat-containing protein 3 OS=Mus musculus OX=10090 GN=Brwd3 PE=1 SV=1 - [BRWD3_MOUSE]	1	1.80513e+07	0		5.83313	1.33	2	2																		#DIV/0!	2	1.80513e+07
Q6P5C7	Zinc finger protein 728 OS=Mus musculus OX=10090 GN=Znf728 PE=2 SV=1 - [ZN728_MOUSE]	1	1.55392e+07	0		1.69289	14.36	2	2																		#DIV/0!	2	1.55392e+07
P84104	Serine/arginine-rich splicing factor 3 OS=Mus musculus OX=10090 GN=Srsf3 PE=1 SV=1 - [SRSF3_MOUSE]	1	1.47742e+07	0		5.05653	14.02	2	2																		#DIV/0!	2	1.47742e+07
P27664	Rod cGMP-specific 3',5'-cyclic phosphodiesterase subunit alpha OS=Mus musculus OX=10090 GN=Pde6a PE=2 SV=3 - [PDE6A_MOUSE]													1	2	1.4469e+07	0		4.00158	1.98	2	2					#DIV/0!	2	1.4469e+07
P62827	GTP-binding nuclear protein Ran OS=Mus musculus OX=10090 GN=Ran PE=1 SV=3 - [RAN_MOUSE]													2	2	1.44019e+07	0		4.3519	10.19	2	2					#DIV/0!	2	1.44019e+07
Q6PAL8	DENN domain-containing protein 5A OS=Mus musculus OX=10090 GN=Dennd5a PE=1 SV=1 - [DEN5A_MOUSE]	2	1.40134e+07	0		6.40293	2.33	2	3																		#DIV/0!	2	1.40134e+07
Q9DC07	LIM zinc-binding domain-containing Nebulette OS=Mus musculus OX=10090 GN=Nebl PE=1 SV=1 - [LNEBL_MOUSE]	1	4.64614e+06	0		1.91931	3.33	1	1					3	3	2.32539e+07	0		8.64091	14.81	3	3					#DIV/0!	2	1.395e+07
Q03717	Potassium voltage-gated channel subfamily B member 1 OS=Mus musculus OX=10090 GN=Kcnb1 PE=1 SV=2 - [KCNB1_MOUSE]													2	2	1.35817e+07	0		5.59786	4.2	2	2					#DIV/0!	2	1.35817e+07
P42225	Signal transducer and activator of transcription 1 OS=Mus musculus OX=10090 GN=Stat1 PE=1 SV=1 - [STAT1_MOUSE]													2	2	1.02212e+07	0		4.85401	3.6	2	2					#DIV/0!	2	1.02212e+07
P53986	Monocarboxylate transporter 1 OS=Mus musculus OX=10090 GN=Slc16a1 PE=1 SV=1 - [MOT1_MOUSE]													2	2	9.98837e+06	0		2.93431	5.07	2	2					#DIV/0!	2	9.98837e+06
Q6ZQ38	Cullin-associated NEDD8-dissociated protein 1 OS=Mus musculus OX=10090 GN=Cand1 PE=1 SV=2 - [CAND1_MOUSE]													2	2	9.85982e+06	0		5.50936	2.44	2	2					#DIV/0!	2	9.85982e+06
Q9QZQ1	Afadin OS=Mus musculus OX=10090 GN=Afdn PE=1 SV=3 - [AFAD_MOUSE]													2	2	6.94181e+06	0		3.1573	1.59	2	2					#DIV/0!	2	6.94181e+06
Q80TZ3	Putative tyrosine-protein phosphatase auxilin OS=Mus musculus OX=10090 GN=Dnajc6 PE=1 SV=2 - [AUXI_MOUSE]													2	2	5750988	0		2.00896	2.45	2	2					#DIV/0!	2	5750988
Q62523	Zyxin OS=Mus musculus OX=10090 GN=Zyx PE=1 SV=2 - [ZYX_MOUSE]													2	2	5.10369e+06	0		4.05257	4.61	2	2					#DIV/0!	2	5.10369e+06
Q5DTL9	Sodium-driven chloride bicarbonate exchanger OS=Mus musculus OX=10090 GN=Slc4a10 PE=1 SV=2 - [S4A10_MOUSE]	1	1.69539e+06	0		2.86543	1.52	1	1					3	3	6.00752e+06	0		8.45797	4.11	3	3					#DIV/0!	2	3.85145e+06
D3YWQ0	Diacylglycerol kinase iota OS=Mus musculus OX=10090 GN=Dgki PE=1 SV=1 - [DGKI_MOUSE]	2	3.83243e+06	0		5.33429	2.43	2	2																		#DIV/0!	2	3.83243e+06
Q7TN98	Cytoplasmic polyadenylation element-binding protein 4 OS=Mus musculus OX=10090 GN=Cpeb4 PE=1 SV=1 - [CPEB4_MOUSE]	1	3.7369e+06	0		4.9929	3.84	2	2																		#DIV/0!	2	3.7369e+06
Q8C2Q3	RNA-binding protein 14 OS=Mus musculus OX=10090 GN=Rbm14 PE=1 SV=1 - [RBM14_MOUSE]													2	2	3.7139e+06	0		4.36994	3.59	2	2					#DIV/0!	2	3.7139e+06
Q80TL7	Protein MON2 homolog OS=Mus musculus OX=10090 GN=Mon2 PE=1 SV=2 - [MON2_MOUSE]													2	2	3.39666e+06	0		3.59085	1.05	2	2					#DIV/0!	2	3.39666e+06
Q80YE4	Serine/threonine-protein kinase LMTK1 OS=Mus musculus OX=10090 GN=Aatk PE=1 SV=1 - [LMTK1_MOUSE]													2	2	3.2051e+06	0		5.05568	1.98	2	2					#DIV/0!	2	3.2051e+06
Q3UTQ7	PR domain zinc finger protein 10 OS=Mus musculus OX=10090 GN=Prdm10 PE=1 SV=2 - [PRD10_MOUSE]	2	3.1519e+06	0		5.40278	2.28	2	2																		#DIV/0!	2	3.1519e+06
Q6P9K8	Caskin-1 OS=Mus musculus OX=10090 GN=Caskin1 PE=1 SV=2 - [CSKI1_MOUSE]													2	2	2.96233e+06	0		2.11628	1.47	2	2					#DIV/0!	2	2.96233e+06
Q8BGD9	Eukaryotic translation initiation factor 4B OS=Mus musculus OX=10090 GN=Eif4b PE=1 SV=1 - [IF4B_MOUSE]													2	2	2.40542e+06	0		3.9509	5.4	2	2					#DIV/0!	2	2.40542e+06
Q9D4J7	PHD finger protein 6 OS=Mus musculus OX=10090 GN=Phf6 PE=1 SV=1 - [PHF6_MOUSE]	2	2.36868e+06	0		5.659	7.97	2	2	3.0224	4.4	1	1														#DIV/0!	2	2.36868e+06
Q61595	Kinectin OS=Mus musculus OX=10090 GN=Ktn1 PE=1 SV=1 - [KTN1_MOUSE]													2	2	1.6088e+06	0		5.79432	2.41	2	2					#DIV/0!	2	1.6088e+06
Q6Q477	Plasma membrane calcium-transporting ATPase 4 OS=Mus musculus OX=10090 GN=Atp2b4 PE=1 SV=1 - [AT2B4_MOUSE]													2	2	901796	0		6.47793	1.99	2	3					#DIV/0!	2	901796
Q9Z315	U4/U6.U5 tri-snRNP-associated protein 1 OS=Mus musculus OX=10090 GN=Sart1 PE=1 SV=1 - [SNUT1_MOUSE]	2	479716	0		2.98373	3.97	2	2																		#DIV/0!	2	479716
Q6URW6	Myosin-14 OS=Mus musculus OX=10090 GN=Myh14 PE=1 SV=1 - [MYH14_MOUSE]													2	2	329048	0		3.35999	2	2	2					#DIV/0!	2	329048
P23440	Rod cGMP-specific 3',5'-cyclic phosphodiesterase subunit beta OS=Mus musculus OX=10090 GN=Pde6b PE=2 SV=3 - [PDE6B_MOUSE]	3	1.08392e+07	0		6.06687	3.5	3	3					2	3	22984637	314230	73.1458	4.40987	3.15	2	2	1.66009	0.82	1	1	73.1458	2.5	1.69119e+07
Q80TJ1	Calcium-dependent secretion activator 1 OS=Mus musculus OX=10090 GN=Cadps PE=1 SV=3 - [CAPS1_MOUSE]	4	6.29509e+06	1.81752e+06	3.46356	8.17686	3.54	4	4	4.50169	1.48	2	2	6	6	2.27862e+07	2.26589e+06	10.0562	13.6538	5.17	6	6	4.20682	1.7	2	2	6.75986	5	1.45406e+07
Q62187	Transcription termination factor 1 OS=Mus musculus OX=10090 GN=Ttf1 PE=1 SV=2 - [TTF1_MOUSE]	15	1.11388e+07	1.90668e+07	0.584199	18.0932	11.64	6	6	34.9691	20.26	13	13	5	5	1.09751e+07	875182	12.5404	9.03904	9.2	5	5	2.02308	1.86	1	1	6.5623	5.5	1.1057e+07
P13595	Neural cell adhesion molecule 1 OS=Mus musculus OX=10090 GN=Ncam1 PE=1 SV=3 - [NCAM1_MOUSE]	28	1.44902e+08	3.75671e+07	3.85716	121.556	37.76	28	48	47.9199	20.27	17	21	30	30	3.75211e+08	4.56248e+07	8.22383	139.851	33.99	28	57	29.4566	14.62	10	12	6.0405	28	2.60057e+08
B1AZP2	Disks large-associated protein 4 OS=Mus musculus OX=10090 GN=Dlgap4 PE=1 SV=1 - [DLGP4_MOUSE]	5	4.52141e+06	8.61152e+06	0.525042	11.4194	5.14	4	4	9.63247	5.04	4	4	6	6	2.07823e+07	1.80042e+06	11.543	12.4508	7.56	5	5	2.1661	2.32	2	2	6.03401	4.5	1.26518e+07
Q91V14	Solute carrier family 12 member 5 OS=Mus musculus OX=10090 GN=Slc12a5 PE=1 SV=2 - [S12A5_MOUSE]	2	4.88248e+06	0		5.3844	2.55	2	2					11	11	4.00325e+07	6.70728e+06	5.96852	23.0397	12.21	11	11	2.06949	1.49	2	2	5.96852	6.5	2.24575e+07
Q5SV85	Synergin gamma OS=Mus musculus OX=10090 GN=Synrg PE=1 SV=1 - [SYNRG_MOUSE]	3	9.75866e+06	1.90524e+06	5.12202	10.3889	3.75	3	3	10.8211	3.75	3	3	10	10	7.05374e+07	1.03697e+07	6.80225	30.2343	13.02	10	11	6.87552	4.44	3	3	5.96214	6.5	4.0148e+07
Q60952	Centrosome-associated protein CEP250 OS=Mus musculus OX=10090 GN=Cep250 PE=1 SV=4 - [CP250_MOUSE]	4	2.89198e+06	0		12.9032	2.94	4	4					3	3	1.1312e+06	220176	5.13769	4.32599	0.99	2	2	2.64215	0.66	1	1	5.13769	3	2.01159e+06
P02463	Collagen alpha-1(IV) chain OS=Mus musculus OX=10090 GN=Col4a1 PE=1 SV=4 - [CO4A1_MOUSE]	5	4.62998e+07	4.77051e+07	0.970542	14.3366	2.7	4	5	11.3244	2.7	3	4	6	6	9.11653e+07	9.97314e+06	9.14109	22.8578	3.71	6	9	6.15115	1.8	3	3	5.05582	5	6.87326e+07
P20612	Guanine nucleotide-binding protein G(t) subunit alpha-1 OS=Mus musculus OX=10090 GN=Gnat1 PE=1 SV=3 - [GNAT1_MOUSE]	11	2.351e+08	2.76746e+07	8.49516	59.9546	42.57	12	20	10.996	15.14	4	4	8	12	1.56733e+08	1.32918e+08	1.17917	26.6635	32.86	9	10	21.3292	35.43	9	9	4.83717	10.5	1.95917e+08
Q9WVL4	Rhodopsin kinase GRK1 OS=Mus musculus OX=10090 GN=Grk1 PE=1 SV=1 - [GRK1_MOUSE]	8	1.49733e+07	0		22.5462	18.26	8	8					2	2	4.40291e+06	931865	4.72484	5.25043	4.96	2	2	1.99955	2.84	1	1	4.72484	5	9.6881e+06
B2RSH2	Guanine nucleotide-binding protein G(i) subunit alpha-1 OS=Mus musculus OX=10090 GN=Gnai1 PE=1 SV=1 - [GNAI1_MOUSE]	1	2.83656e+08	3.19851e+06	88.6839	6.67124	7.34	2	3	2.24155	4.24	1	1														88.6839	2	2.83656e+08
Q9JIX8	Apoptotic chromatin condensation inducer in the nucleus OS=Mus musculus OX=10090 GN=Acin1 PE=1 SV=3 - [ACINU_MOUSE]	14	1.43178e+07	1.23516e+07	1.15918	21.5404	9.19	7	7	30.4207	13.23	12	12	6	6	6.85711e+06	1.1082e+06	6.18763	18.9194	5.68	6	6	2.11938	1.2	1	1	3.67341	6.5	1.05874e+07
Q8VCM7	Fibrinogen gamma chain OS=Mus musculus OX=10090 GN=Fgg PE=1 SV=1 - [FIBG_MOUSE]	8	3.55802e+07	5.58674e+06	6.36869	19.1659	22.48	8	9	8.7029	11.24	3	3	6	6	3.71665e+07	4.17643e+07	0.889911	11.5095	12.39	5	5	13.421	17.66	6	7	3.6293	6.5	3.63733e+07
E9PV24	Fibrinogen alpha chain OS=Mus musculus OX=10090 GN=Fga PE=1 SV=1 - [FIBA_MOUSE]	5	2.39153e+07	3.97493e+06	6.01654	13.0988	7.86	5	5	4.61151	3.17	2	2	7	7	2.85257e+07	2.33773e+07	1.22023	2.46594	3.42	3	3	7.69599	6.72	5	5	3.61839	4	2.62205e+07
Q3ULD5	Methylcrotonoyl-CoA carboxylase beta chain, mitochondrial OS=Mus musculus OX=10090 GN=Mccc2 PE=1 SV=1 - [MCCB_MOUSE]	7	3.61917e+07	6.09506e+06	5.93787	14.6335	12.26	6	6	8.7213	9.95	4	4	10	10	5.00851e+07	3.90619e+07	1.2822	23.5063	19.18	9	9	21.9124	14.56	7	9	3.61003	7.5	4.31384e+07
P11276	Fibronectin OS=Mus musculus OX=10090 GN=Fn1 PE=1 SV=4 - [FINC_MOUSE]	12	1.32566e+07	4.36279e+06	3.03857	32.255	7.23	11	11	13.922	3.15	5	5	7	7	1.87813e+07	4.49897e+06	4.17459	21.4376	3.96	6	9	7.37549	1.66	3	3	3.60658	8.5	1.6019e+07
Q68FH0	Plakophilin-4 OS=Mus musculus OX=10090 GN=Pkp4 PE=1 SV=1 - [PKP4_MOUSE]	7	7.15534e+06	3.2473e+06	2.20347	9.05423	5.71	4	4	17.8894	10.42	8	8	3	4	1.97195e+07	4.09727e+06	4.81284	8.93044	5.63	4	4	0	0.84	1	1	3.50816	4	1.34374e+07
P52785	Retinal guanylyl cyclase 1 OS=Mus musculus OX=10090 GN=Gucy2e PE=1 SV=2 - [GUC2E_MOUSE]	8	7.74523e+06	2.19968e+06	3.52108	33.1617	15.7	11	12	6.69115	1.9	1	2	4	4	1.16409e+07	4.36049e+06	2.66963	11.0242	6.23	4	4	8.23463	4.69	3	3	3.09535	7.5	9.69306e+06
P08122	Collagen alpha-2(IV) chain OS=Mus musculus OX=10090 GN=Col4a2 PE=1 SV=4 - [CO4A2_MOUSE]	4	4.06324e+07	7.26902e+06	5.5898	9.41784	2.75	4	5	2.00622	0.76	1	1	3	3	4.45245e+07	16209375	2.74684	8.48279	2.52	3	3	2.01504	0.7	1	1	4.16832	3.5	4.25785e+07
Q8C1S0	Mediator of RNA polymerase II transcription subunit 19 OS=Mus musculus OX=10090 GN=Med19 PE=1 SV=1 - [MED19_MOUSE]	3	1.26895e+07	0		7.6684	15.57	2	2	10.2808	25.41	3	3	1	1	1.88421e+07	0		3.3834	10.66	1	1					#DIV/0!	1.5	1.57658e+07
Q3TV65	MPN domain-containing protein OS=Mus musculus OX=10090 GN=Mpnd PE=2 SV=2 - [MPND_MOUSE]	2	8.44539e+06	0		6.98639	7.6	2	2	3.65267	4.93	1	1	1	1	3035094	0		2.66835	5.13	1	1					#DIV/0!	1.5	5.74024e+06
Q9JME5	AP-3 complex subunit beta-2 OS=Mus musculus OX=10090 GN=Ap3b2 PE=1 SV=2 - [AP3B2_MOUSE]	2	1.94317e+06	0		2.08529	1.02	1	1	2.7821	1.2	1	1	2	2	9.08517e+06	0		4.95187	2.13	2	2					#DIV/0!	1.5	5.51417e+06
A2AJA9	Apical junction component 1 homolog OS=Mus musculus OX=10090 GN=Ajm1 PE=1 SV=1 - [AJM1_MOUSE]	2	1.14819e+06	0		5.48828	2.98	2	2					1	1	2.25455e+06	0		2.96447	1.64	1	1					#DIV/0!	1.5	1.70137e+06
Q3UHD1	Adhesion G protein-coupled receptor B1 OS=Mus musculus OX=10090 GN=Adgrb1 PE=1 SV=1 - [AGRB1_MOUSE]	2	711850	0		4.11758	1.26	2	2					1	1	1.15737e+06	0		3.20724	0.82	1	1					#DIV/0!	1.5	934609
Q8CE72	Ciliogenesis and planar polarity effector 1 OS=Mus musculus OX=10090 GN=Cplane1 PE=1 SV=4 - [CPLN1_MOUSE]													1	1	2.18565e+09	0		0	0.19	1	2					#DIV/0!	1	2.18565e+09
P70180	Atrial natriuretic peptide receptor 3 OS=Mus musculus OX=10090 GN=Npr3 PE=1 SV=3 - [ANPRC_MOUSE]	1	1454214346	0		4.41727	3.73	1	1																		#DIV/0!	1	1454214346
Q5EBP3	Armadillo repeat-containing protein 5 OS=Mus musculus OX=10090 GN=Armc5 PE=2 SV=1 - [ARMC5_MOUSE]	1	2.60634e+09	0		33.8252	4.75	1	16	15.2071	4.75	1	7	1	1	0	0		20.6305	4.75	1	7	4.33909	4.75	1	1	#DIV/0!	1	1.30317e+09
Q8BI71	Exocyst complex component 3-like protein OS=Mus musculus OX=10090 GN=Exoc3l1 PE=1 SV=1 - [EX3L1_MOUSE]	1	9.91163e+08	0		0	0.81	1	1																		#DIV/0!	1	9.91163e+08
P20664	DNA primase small subunit OS=Mus musculus OX=10090 GN=Prim1 PE=1 SV=1 - [PRI1_MOUSE]	1	4.54973e+08	0		0	1.44	1	1																		#DIV/0!	1	4.54973e+08
B1AQ75	Keratin, type I cuticular Ha6 OS=Mus musculus OX=10090 GN=Krt36 PE=1 SV=1 - [KRT36_MOUSE]	1	404313005	0		1.88637	1.48	1	1	2.38607	3.17	1	1														#DIV/0!	1	404313005
Q8R4H7	N-acetylglutamate synthase, mitochondrial OS=Mus musculus OX=10090 GN=Nags PE=1 SV=2 - [NAGS_MOUSE]													1	1	3.36944e+08	0		0	2.09	1	1					#DIV/0!	1	3.36944e+08
Q9Z1T1	AP-3 complex subunit beta-1 OS=Mus musculus OX=10090 GN=Ap3b1 PE=1 SV=2 - [AP3B1_MOUSE]													1	1	271958728	0		3.36099	1.63	1	1					#DIV/0!	1	271958728
Q5DTW7	Retroelement silencing factor 1 OS=Mus musculus OX=10090 GN=Resf1 PE=1 SV=2 - [RESF1_MOUSE]	1	460825424	0		2.31084	0.53	1	1					1	1	3.89395e+07	0		4.00788	0.53	1	2					#DIV/0!	1	2.49882e+08
Q5SW19	Clustered mitochondria protein homolog OS=Mus musculus OX=10090 GN=Cluh PE=1 SV=2 - [CLU_MOUSE]													1	1	235221815	0		2.27905	1.29	1	1					#DIV/0!	1	235221815
Q9WVQ0	Polyamine-modulated factor 1-binding protein 1 OS=Mus musculus OX=10090 GN=Pmfbp1 PE=2 SV=1 - [PMFBP_MOUSE]													1	1	2.21739e+08	0		2.42529	0.98	1	1					#DIV/0!	1	2.21739e+08
Q9CQE0	E3 ubiquitin-protein ligase RNF138 OS=Mus musculus OX=10090 GN=Rnf138 PE=2 SV=1 - [RN138_MOUSE]	1	2.16603e+08	0		2.38885	3.67	1	1																		#DIV/0!	1	2.16603e+08
P59016	Vacuolar protein sorting-associated protein 33B OS=Mus musculus OX=10090 GN=Vps33b PE=1 SV=1 - [VP33B_MOUSE]	1	2.08511e+08	0		1.72251	1.13	1	1																		#DIV/0!	1	2.08511e+08
Q923Z4	Fer3-like protein OS=Mus musculus OX=10090 GN=Ferd3l PE=1 SV=1 - [FER3L_MOUSE]													1	1	1.59803e+08	0		2.82813	8.33	1	1					#DIV/0!	1	1.59803e+08
F8VPZ9	BRD4-interacting chromatin-remodeling complex-associated protein OS=Mus musculus OX=10090 GN=Bicra PE=1 SV=1 - [BICRA_MOUSE]													1	1	1.28277e+08	0		0	0.63	1	1					#DIV/0!	1	1.28277e+08
Q9WUX5	Inositol 1,4,5-triphosphate receptor associated 1 OS=Mus musculus OX=10090 GN=Irag1 PE=1 SV=2 - [IRAG1_MOUSE]	1	1.12173e+08	0		1.63171	1.11	1	1																		#DIV/0!	1	1.12173e+08
P0C6F1	Dynein heavy chain 2, axonemal OS=Mus musculus OX=10090 GN=Dnah2 PE=1 SV=1 - [DYH2_MOUSE]													1	1	1.05992e+08	0		2.23374	0.36	1	1					#DIV/0!	1	1.05992e+08
Q5U4D8	Sodium-dependent multivitamin transporter OS=Mus musculus OX=10090 GN=Slc5a6 PE=1 SV=2 - [SC5A6_MOUSE]													1	1	1.01383e+08	0		0	2.37	1	1					#DIV/0!	1	1.01383e+08
P56564	Excitatory amino acid transporter 1 OS=Mus musculus OX=10090 GN=Slc1a3 PE=1 SV=2 - [EAA1_MOUSE]	1	9.9087e+07	0		1.72908	1.29	1	1																		#DIV/0!	1	9.9087e+07
Q9D5Y1	Coiled-coil domain-containing protein 39 OS=Mus musculus OX=10090 GN=Ccdc39 PE=1 SV=1 - [CCD39_MOUSE]													1	1	97379258	0		0	0.64	1	1					#DIV/0!	1	97379258
A3KGK3	Fer-1-like protein 4 OS=Mus musculus OX=10090 GN=Fer1l4 PE=2 SV=3 - [FR1L4_MOUSE]	1	1.18921e+08	0		3.20024	1.1	1	1					1	1	5.89204e+07	0		4.44122	1.46	1	1					#DIV/0!	1	8.89208e+07
O35177	Enhancer of filamentation 1 OS=Mus musculus OX=10090 GN=Nedd9 PE=1 SV=2 - [CASL_MOUSE]													1	1	8.23041e+07	0		2.11543	1.44	1	1					#DIV/0!	1	8.23041e+07
Q00547	Hyaluronan mediated motility receptor OS=Mus musculus OX=10090 GN=Hmmr PE=1 SV=4 - [HMMR_MOUSE]													1	1	7.95683e+07	0		2.88323	1.76	1	1					#DIV/0!	1	7.95683e+07
Q9ESC8	AF4/FMR2 family member 4 OS=Mus musculus OX=10090 GN=Aff4 PE=1 SV=1 - [AFF4_MOUSE]	1	7.9165e+07	0		3.77879	1.72	1	1																		#DIV/0!	1	7.9165e+07
Q5SXA9	Protein KIBRA OS=Mus musculus OX=10090 GN=Wwc1 PE=1 SV=1 - [KIBRA_MOUSE]	1	78207623	0		0	0.63	1	1																		#DIV/0!	1	78207623
P97460	Neuronal PAS domain-containing protein 2 OS=Mus musculus OX=10090 GN=Npas2 PE=1 SV=1 - [NPAS2_MOUSE]	1	77128727	0		3.81069	5.51	1	1																		#DIV/0!	1	77128727
P97717	Alpha-1B adrenergic receptor OS=Mus musculus OX=10090 GN=Adra1b PE=1 SV=2 - [ADA1B_MOUSE]	1	6.12917e+07	0		2.3883	2.72	1	1																		#DIV/0!	1	6.12917e+07
Q3TY86	Apoptosis-inducing factor 3 OS=Mus musculus OX=10090 GN=Aifm3 PE=1 SV=1 - [AIFM3_MOUSE]													1	1	5.39931e+07	0		1.87848	1.49	1	1					#DIV/0!	1	5.39931e+07
Q04736	Tyrosine-protein kinase Yes OS=Mus musculus OX=10090 GN=Yes1 PE=1 SV=3 - [YES_MOUSE]													1	1	53820866	0		0	1.11	1	1					#DIV/0!	1	53820866
P63038	60 kDa heat shock protein, mitochondrial OS=Mus musculus OX=10090 GN=Hspd1 PE=1 SV=1 - [CH60_MOUSE]	1	5.26058e+07	0		3.91317	4.01	1	2																		#DIV/0!	1	5.26058e+07
B2RRE4	Zinc finger protein 518B OS=Mus musculus OX=10090 GN=Znf518b PE=2 SV=1 - [Z518B_MOUSE]													1	1	5.23109e+07	0		0	3.9	1	1					#DIV/0!	1	5.23109e+07
Q6NS57	Mitogen-activated protein kinase-binding protein 1 OS=Mus musculus OX=10090 GN=Mapkbp1 PE=1 SV=1 - [MABP1_MOUSE]													1	1	5.2123e+07	0		2.79821	1.66	1	1					#DIV/0!	1	5.2123e+07
Q70KF4	Cardiomyopathy-associated protein 5 OS=Mus musculus OX=10090 GN=Cmya5 PE=1 SV=2 - [CMYA5_MOUSE]													1	1	48310410	0		2.59854	0.43	1	1					#DIV/0!	1	48310410
O70340	Neuronal pentraxin-2 OS=Mus musculus OX=10090 GN=Nptx2 PE=2 SV=1 - [NPTX2_MOUSE]	1	4.59789e+07	0		3.51162	10.02	1	1																		#DIV/0!	1	4.59789e+07
Q8BQM7	Single-pass membrane and coiled-coil domain-containing protein 3 OS=Mus musculus OX=10090 GN=Smco3 PE=2 SV=1 - [SMCO3_MOUSE]	1	4.29739e+07	0		0	2.67	1	1																		#DIV/0!	1	4.29739e+07
Q9Z188	Dual specificity tyrosine-phosphorylation-regulated kinase 1B OS=Mus musculus OX=10090 GN=Dyrk1b PE=1 SV=3 - [DYR1B_MOUSE]	1	4.29606e+07	0		3.03785	3.18	1	1																		#DIV/0!	1	4.29606e+07
P68040	Receptor of activated protein C kinase 1 OS=Mus musculus OX=10090 GN=Rack1 PE=1 SV=3 - [RACK1_MOUSE]													1	1	4.00754e+07	0		5.01213	5.05	1	2					#DIV/0!	1	4.00754e+07
P52482	Ubiquitin-conjugating enzyme E2 E1 OS=Mus musculus OX=10090 GN=Ube2e1 PE=1 SV=1 - [UB2E1_MOUSE]													1	1	3.9779e+07	0		2.03361	4.66	1	1					#DIV/0!	1	3.9779e+07
P34152	Focal adhesion kinase 1 OS=Mus musculus OX=10090 GN=Ptk2 PE=1 SV=4 - [FAK1_MOUSE]	1	39259192	0		1.86589	0.67	1	1	0	0.67	1	1														#DIV/0!	1	39259192
Q8BG17	Nucleolar protein 12 OS=Mus musculus OX=10090 GN=Nol12 PE=1 SV=1 - [NOL12_MOUSE]	1	3.57373e+07	0		0	3.23	1	1																		#DIV/0!	1	3.57373e+07
P18653	Ribosomal protein S6 kinase alpha-1 OS=Mus musculus OX=10090 GN=Rps6ka1 PE=1 SV=1 - [KS6A1_MOUSE]													1	1	2.64678e+07	0		3.64986	3.59	1	1					#DIV/0!	1	2.64678e+07
Q9WUH7	Semaphorin-4G OS=Mus musculus OX=10090 GN=Sema4g PE=1 SV=1 - [SEM4G_MOUSE]													1	1	2.59532e+07	0		4.08861	4.18	1	1					#DIV/0!	1	2.59532e+07
Q8K4E0	Alstrom syndrome protein 1 homolog OS=Mus musculus OX=10090 GN=Alms1 PE=1 SV=2 - [ALMS1_MOUSE]													1	1	2.54291e+07	0		1.93786	0.58	1	1					#DIV/0!	1	2.54291e+07
Q9EPC2	Fibroblast growth factor 23 OS=Mus musculus OX=10090 GN=Fgf23 PE=1 SV=1 - [FGF23_MOUSE]	1	25351294	0		1.97118	6.37	1	1																		#DIV/0!	1	25351294
Q3UGM2	Serine/threonine-protein kinase Nek10 OS=Mus musculus OX=10090 GN=Nek10 PE=2 SV=2 - [NEK10_MOUSE]													1	1	2.51143e+07	0		2.46259	1.26	1	1					#DIV/0!	1	2.51143e+07
P28571	Sodium- and chloride-dependent glycine transporter 1 OS=Mus musculus OX=10090 GN=Slc6a9 PE=1 SV=3 - [SC6A9_MOUSE]	1	8482806	0		0	1.45	1	1					1	1	4.10508e+07	0		0	1.01	1	1					#DIV/0!	1	2.47668e+07
Q8CH77	Neuron navigator 1 OS=Mus musculus OX=10090 GN=Nav1 PE=1 SV=2 - [NAV1_MOUSE]													1	1	2.20326e+07	0		2.63846	0.75	1	1					#DIV/0!	1	2.20326e+07
A2A5R2	Brefeldin A-inhibited guanine nucleotide-exchange protein 2 OS=Mus musculus OX=10090 GN=Arfgef2 PE=1 SV=1 - [BIG2_MOUSE]	1	1.95361e+07	0		3.2166	1.28	1	1																		#DIV/0!	1	1.95361e+07
Q8VI64	Protein MGARP OS=Mus musculus OX=10090 GN=Mgarp PE=1 SV=1 - [HUMMR_MOUSE]													1	1	1.89023e+07	0		2.02144	3.89	1	1					#DIV/0!	1	1.89023e+07
Q8BVK9	Sp110 nuclear body protein OS=Mus musculus OX=10090 GN=Sp110 PE=1 SV=1 - [SP110_MOUSE]													1	1	1.68771e+07	0		2.00393	2.02	1	1					#DIV/0!	1	1.68771e+07
P40749	Synaptotagmin-4 OS=Mus musculus OX=10090 GN=Syt4 PE=1 SV=2 - [SYT4_MOUSE]	1	1.68652e+07	0		2.2132	1.88	1	1																		#DIV/0!	1	1.68652e+07
P70193	Leucine-rich repeats and immunoglobulin-like domains protein 1 OS=Mus musculus OX=10090 GN=Lrig1 PE=1 SV=2 - [LRIG1_MOUSE]	1	1.61869e+07	0		1.67887	0.73	1	1																		#DIV/0!	1	1.61869e+07
E9PXB6	Surfactant-associated protein 2 OS=Mus musculus OX=10090 GN=Sfta2 PE=2 SV=1 - [SFTA2_MOUSE]	1	1.58049e+07	0		1.74063	20.78	1	1																		#DIV/0!	1	1.58049e+07
A6H630	Damage-control phosphatase ARMT1 OS=Mus musculus OX=10090 GN=Armt1 PE=1 SV=1 - [ARMT1_MOUSE]	1	1.52126e+07	0		2.10407	1.59	1	1																		#DIV/0!	1	1.52126e+07
P70266	6-phosphofructo-2-kinase/fructose-2,6-bisphosphatase 1 OS=Mus musculus OX=10090 GN=Pfkfb1 PE=1 SV=2 - [F261_MOUSE]													1	1	1.5139e+07	0		3.03037	3.18	1	2					#DIV/0!	1	1.5139e+07
Q5SYL3	Protein KIAA0100 OS=Mus musculus OX=10090 GN=Kiaa0100 PE=1 SV=1 - [K0100_MOUSE]	1	1.50181e+07	0		0	0.31	1	1																		#DIV/0!	1	1.50181e+07
Q2UY11	Collagen alpha-1(XXVIII) chain OS=Mus musculus OX=10090 GN=Col28a1 PE=2 SV=1 - [COSA1_MOUSE]													1	1	1.48375e+07	0		0	1.23	1	1					#DIV/0!	1	1.48375e+07
P13504	Interleukin-1 receptor type 1 OS=Mus musculus OX=10090 GN=Il1r1 PE=1 SV=1 - [IL1R1_MOUSE]	1	1.35821e+07	0		3.68389	6.08	1	1																		#DIV/0!	1	1.35821e+07
Q68FM6	Protein phosphatase 1 regulatory subunit 29 OS=Mus musculus OX=10090 GN=Elfn2 PE=1 SV=1 - [PPR29_MOUSE]													1	1	1.31839e+07	0		2.49527	1.94	1	1					#DIV/0!	1	1.31839e+07
Q64339	Ubiquitin-like protein ISG15 OS=Mus musculus OX=10090 GN=Isg15 PE=1 SV=4 - [ISG15_MOUSE]													1	1	1.30537e+07	0		3.77439	13.66	1	1	4.20548	13.66	1	1	#DIV/0!	1	1.30537e+07
D3YXS5	Kinesin-like protein KIF28P OS=Mus musculus OX=10090 GN=Kif28p PE=3 SV=1 - [KIF28_MOUSE]	1	1.28314e+07	0		2.71753	1.75	1	1																		#DIV/0!	1	1.28314e+07
Q80UG8	Tubulin polyglutamylase TTLL4 OS=Mus musculus OX=10090 GN=Ttll4 PE=1 SV=3 - [TTLL4_MOUSE]	1	1.26254e+07	0		3.94158	1.59	1	1																		#DIV/0!	1	1.26254e+07
O88466	Zinc finger protein 106 OS=Mus musculus OX=10090 GN=Znf106 PE=1 SV=3 - [ZN106_MOUSE]													1	1	1.26254e+07	0		0	0.37	1	1					#DIV/0!	1	1.26254e+07
O70309	Integrin beta-5 OS=Mus musculus OX=10090 GN=Itgb5 PE=1 SV=2 - [ITB5_MOUSE]	1	1.23713e+07	0		2.56662	2.26	1	1																		#DIV/0!	1	1.23713e+07
Q8CES0	N-alpha-acetyltransferase 30 OS=Mus musculus OX=10090 GN=Naa30 PE=1 SV=2 - [NAA30_MOUSE]													1	1	1.20956e+07	0		3.18244	7.14	1	1					#DIV/0!	1	1.20956e+07
P98083	SHC-transforming protein 1 OS=Mus musculus OX=10090 GN=Shc1 PE=1 SV=3 - [SHC1_MOUSE]	1	1.19316e+07	0		2.79415	3.45	1	1																		#DIV/0!	1	1.19316e+07
Q9WUD1	STIP1 homology and U box-containing protein 1 OS=Mus musculus OX=10090 GN=Stub1 PE=1 SV=1 - [CHIP_MOUSE]													1	1	1.18777e+07	0		2.52594	5.26	1	1					#DIV/0!	1	1.18777e+07
Q60598	Src substrate cortactin OS=Mus musculus OX=10090 GN=Cttn PE=1 SV=2 - [SRC8_MOUSE]													1	1	1.16842e+07	0		1.80134	1.28	1	1					#DIV/0!	1	1.16842e+07
Q9CWR8	DNA (cytosine-5)-methyltransferase 3-like OS=Mus musculus OX=10090 GN=Dnmt3l PE=1 SV=1 - [DNM3L_MOUSE]													1	1	11529138	0		0	1.43	1	1					#DIV/0!	1	11529138
P10493	Nidogen-1 OS=Mus musculus OX=10090 GN=Nid1 PE=1 SV=2 - [NID1_MOUSE]	1	2.0629e+06	0		2.27979	0.88	1	1					1	1	20987652	0		2.72855	1.29	1	1					#DIV/0!	1	1.15253e+07
Q8BHZ0	CYFIP-related Rac1 interactor A OS=Mus musculus OX=10090 GN=Cyria PE=1 SV=1 - [CYRIA_MOUSE]	1	1.1509e+07	0		1.67685	2.17	1	1																		#DIV/0!	1	1.1509e+07
Q8BID6	Zinc finger and BTB domain-containing protein 46 OS=Mus musculus OX=10090 GN=Zbtb46 PE=1 SV=2 - [ZBT46_MOUSE]	1	1.14937e+07	0		0	1.17	1	1																		#DIV/0!	1	1.14937e+07
Q62028	Secretory phospholipase A2 receptor OS=Mus musculus OX=10090 GN=Pla2r1 PE=1 SV=1 - [PLA2R_MOUSE]	1	11458095	0		1.7673	0.4	1	1																		#DIV/0!	1	11458095
Q3V1M1	Immunoglobulin superfamily member 10 OS=Mus musculus OX=10090 GN=Igsf10 PE=2 SV=2 - [IGS10_MOUSE]													1	1	1.12819e+07	0		2.52768	0.62	1	1					#DIV/0!	1	1.12819e+07
Q8C1A5	Thimet oligopeptidase OS=Mus musculus OX=10090 GN=Thop1 PE=1 SV=1 - [THOP1_MOUSE]													1	1	1.12814e+07	0		1.60046	0.87	1	1					#DIV/0!	1	1.12814e+07
Q8BMB0	BRCA2-interacting transcriptional repressor EMSY OS=Mus musculus OX=10090 GN=Emsy PE=1 SV=2 - [EMSY_MOUSE]	1	1.08304e+07	0		3.08945	1.5	1	1					1	1	1.13503e+07	0		2.55687	1.5	1	1					#DIV/0!	1	1.10904e+07
Q8CB62	Centrobin OS=Mus musculus OX=10090 GN=Cntrob PE=2 SV=2 - [CNTRB_MOUSE]	1	1.10539e+07	0		1.7725	1.01	1	1																		#DIV/0!	1	1.10539e+07
O88704	Potassium/sodium hyperpolarization-activated cyclic nucleotide-gated channel 1 OS=Mus musculus OX=10090 GN=Hcn1 PE=1 SV=1 - [HCN1_MOUSE]													1	1	1.09843e+07	0		2.53889	1.32	1	1					#DIV/0!	1	1.09843e+07
Q8R050	Eukaryotic peptide chain release factor GTP-binding subunit ERF3A OS=Mus musculus OX=10090 GN=Gspt1 PE=1 SV=2 - [ERF3A_MOUSE]													1	1	1.04642e+07	0		2.20238	1.57	1	1					#DIV/0!	1	1.04642e+07
Q8BJL0	SWI/SNF-related matrix-associated actin-dependent regulator of chromatin subfamily A-like protein 1 OS=Mus musculus OX=10090 GN=Smarcal1 PE=1 SV=1 - [SMAL1_MOUSE]	1	1.02514e+07	0		3.43557	1.87	1	1																		#DIV/0!	1	1.02514e+07
A6H690	IQ and AAA domain-containing protein 1-like OS=Mus musculus OX=10090 GN=Iqca1l PE=1 SV=3 - [IQCAL_MOUSE]													1	1	1.00004e+07	0		1.8839	0.85	1	1					#DIV/0!	1	1.00004e+07
Q9JLN9	Serine/threonine-protein kinase mTOR OS=Mus musculus OX=10090 GN=Mtor PE=1 SV=2 - [MTOR_MOUSE]	1	9.8576e+06	0		4.12492	1.49	1	1																		#DIV/0!	1	9.8576e+06
P60867	40S ribosomal protein S20 OS=Mus musculus OX=10090 GN=Rps20 PE=1 SV=1 - [RS20_MOUSE]													1	1	9.72623e+06	0		2.16419	9.24	1	1					#DIV/0!	1	9.72623e+06
P42669	Transcriptional activator protein Pur-alpha OS=Mus musculus OX=10090 GN=Pura PE=1 SV=1 - [PURA_MOUSE]	1	9.63978e+06	0		3.48303	8.1	1	1	2.96377	8.1	1	1														#DIV/0!	1	9.63978e+06
Q60930	Voltage-dependent anion-selective channel protein 2 OS=Mus musculus OX=10090 GN=Vdac2 PE=1 SV=2 - [VDAC2_MOUSE]													1	1	9.42841e+06	0		1.71743	3.39	1	1					#DIV/0!	1	9.42841e+06
Q8CI17	Protein mab-21-like 3 OS=Mus musculus OX=10090 GN=Mab21L3 PE=2 SV=2 - [MB213_MOUSE]	1	9.35744e+06	0		0	1.4	1	1																		#DIV/0!	1	9.35744e+06
P49749	Homeobox even-skipped homolog protein 2 OS=Mus musculus OX=10090 GN=Evx2 PE=2 SV=1 - [EVX2_MOUSE]	1	9.33802e+06	0		3.0527	9.26	1	1																		#DIV/0!	1	9.33802e+06
Q8BPA8	Protein DPCD OS=Mus musculus OX=10090 GN=Dpcd PE=1 SV=1 - [DPCD_MOUSE]													1	1	9.04361e+06	0		0	2.96	1	1					#DIV/0!	1	9.04361e+06
Q9Z138	Tyrosine-protein kinase transmembrane receptor ROR2 OS=Mus musculus OX=10090 GN=Ror2 PE=1 SV=2 - [ROR2_MOUSE]													1	1	8.75264e+06	0		2.64192	1.38	1	1					#DIV/0!	1	8.75264e+06
Q9R269	Periplakin OS=Mus musculus OX=10090 GN=Ppl PE=1 SV=1 - [PEPL_MOUSE]													1	1	8.73506e+06	0		0	0.85	1	1					#DIV/0!	1	8.73506e+06
Q80TH2	Erbin OS=Mus musculus OX=10090 GN=Erbin PE=1 SV=3 - [ERBIN_MOUSE]													1	1	8.43688e+06	0		1.85504	0.57	1	1					#DIV/0!	1	8.43688e+06
P97929	Breast cancer type 2 susceptibility protein homolog OS=Mus musculus OX=10090 GN=Brca2 PE=1 SV=2 - [BRCA2_MOUSE]													1	1	8.2158e+06	0		0	0.18	1	1					#DIV/0!	1	8.2158e+06
O08547	Vesicle-trafficking protein SEC22b OS=Mus musculus OX=10090 GN=Sec22b PE=1 SV=3 - [SC22B_MOUSE]	1	1.15358e+06	0		2.54022	6.51	1	1					1	1	1.50854e+07	0		3.45944	6.51	1	1					#DIV/0!	1	8.11951e+06
Q9Z2C5	Myotubularin OS=Mus musculus OX=10090 GN=Mtm1 PE=1 SV=2 - [MTM1_MOUSE]													1	1	8.08637e+06	0		2.74626	1.99	1	1					#DIV/0!	1	8.08637e+06
Q9DBM2	Peroxisomal bifunctional enzyme OS=Mus musculus OX=10090 GN=Ehhadh PE=1 SV=4 - [ECHP_MOUSE]	1	7.9615e+06	0		3.42276	2.23	1	1																		#DIV/0!	1	7.9615e+06
Q8BRT1	CLIP-associating protein 2 OS=Mus musculus OX=10090 GN=Clasp2 PE=1 SV=1 - [CLAP2_MOUSE]													1	1	7.9206e+06	0		1.82027	0.78	1	1					#DIV/0!	1	7.9206e+06
P63087	Serine/threonine-protein phosphatase PP1-gamma catalytic subunit OS=Mus musculus OX=10090 GN=Ppp1cc PE=1 SV=1 - [PP1G_MOUSE]													1	1	7777454	0		0	3.41	1	1					#DIV/0!	1	7777454
Q922J3	CAP-Gly domain-containing linker protein 1 OS=Mus musculus OX=10090 GN=Clip1 PE=1 SV=1 - [CLIP1_MOUSE]													1	1	7.76855e+06	0		2.51623	2.37	1	1					#DIV/0!	1	7.76855e+06
Q8CGI1	Protein FAM193A OS=Mus musculus OX=10090 GN=Fam193a PE=1 SV=2 - [F193A_MOUSE]													1	1	7.66032e+06	0		2.41991	0.73	1	1					#DIV/0!	1	7.66032e+06
Q8K2K6	Arf-GAP domain and FG repeat-containing protein 1 OS=Mus musculus OX=10090 GN=Agfg1 PE=1 SV=2 - [AGFG1_MOUSE]													1	1	7.64578e+06	0		2.33042	1.96	1	1					#DIV/0!	1	7.64578e+06
Q8BZB3	Transmembrane protein 266 OS=Mus musculus OX=10090 GN=Tmem266 PE=1 SV=3 - [TM266_MOUSE]													1	1	7.33546e+06	0		3.25928	2.6	1	1					#DIV/0!	1	7.33546e+06
P70404	Isocitrate dehydrogenase [NAD] subunit gamma 1, mitochondrial OS=Mus musculus OX=10090 GN=Idh3g PE=1 SV=1 - [IDHG1_MOUSE]													1	1	7.28994e+06	0		3.13817	5.09	1	1					#DIV/0!	1	7.28994e+06
Q61644	Protein kinase C and casein kinase substrate in neurons protein 1 OS=Mus musculus OX=10090 GN=Pacsin1 PE=1 SV=1 - [PACN1_MOUSE]	1	7.20182e+06	0		0	1.59	1	1																		#DIV/0!	1	7.20182e+06
Q9WUS4	Gap junction alpha-10 protein OS=Mus musculus OX=10090 GN=Gja10 PE=1 SV=2 - [CXA10_MOUSE]	1	1.76139e+06	0		2.08862	2.97	1	1					1	1	1.20018e+07	0		2.48009	2.97	1	1					#DIV/0!	1	6.88158e+06
Q8K2H1	Periphilin-1 OS=Mus musculus OX=10090 GN=Pphln1 PE=1 SV=1 - [PPHLN_MOUSE]	1	6.82611e+06	0		1.70794	1.57	1	1																		#DIV/0!	1	6.82611e+06
Q6PDJ1	VWFA and cache domain-containing protein 1 OS=Mus musculus OX=10090 GN=Cachd1 PE=2 SV=1 - [CAHD1_MOUSE]	1	6.75142e+06	0		3.45091	2.25	1	1																		#DIV/0!	1	6.75142e+06
Q8CDU5	EF-hand domain-containing family member B OS=Mus musculus OX=10090 GN=Efhb PE=1 SV=2 - [EFHB_MOUSE]	1	6.70452e+06	0		2.04884	2.34	1	1																		#DIV/0!	1	6.70452e+06
Q80WJ7	Protein LYRIC OS=Mus musculus OX=10090 GN=Mtdh PE=1 SV=1 - [LYRIC_MOUSE]	1	6.60276e+06	0		2.16268	1.55	1	1																		#DIV/0!	1	6.60276e+06
Q06180	Tyrosine-protein phosphatase non-receptor type 2 OS=Mus musculus OX=10090 GN=Ptpn2 PE=1 SV=2 - [PTN2_MOUSE]													1	1	6.50329e+06	0		2.10214	2.71	1	1					#DIV/0!	1	6.50329e+06
Q9D6K5	Synaptojanin-2-binding protein OS=Mus musculus OX=10090 GN=Synj2bp PE=1 SV=1 - [SYJ2B_MOUSE]	1	6.47385e+06	0		2.169	6.21	1	1																		#DIV/0!	1	6.47385e+06
Q62511	E3 ubiquitin-protein ligase ZFP91 OS=Mus musculus OX=10090 GN=Zfp91 PE=1 SV=3 - [ZFP91_MOUSE]	1	6.3116e+06	0		3.37856	2.45	1	1																		#DIV/0!	1	6.3116e+06
Q5RJ54	Zinc finger and SCAN domain-containing protein 26 OS=Mus musculus OX=10090 GN=Zscan26 PE=2 SV=1 - [ZSC26_MOUSE]													1	1	6.30997e+06	0		1.92241	2.15	1	1					#DIV/0!	1	6.30997e+06
Q9DCA5	Ribosome biogenesis protein BRX1 homolog OS=Mus musculus OX=10090 GN=Brix1 PE=1 SV=3 - [BRX1_MOUSE]													1	1	6.15994e+06	0		0	1.98	1	1					#DIV/0!	1	6.15994e+06
Q5XG69	Soluble lamin-associated protein of 75 kDa OS=Mus musculus OX=10090 GN=Fam169a PE=1 SV=3 - [F169A_MOUSE]	1	2.1981e+06	0		2.93081	2.56	1	1					1	1	9.37689e+06	0		2.18217	1.2	1	1					#DIV/0!	1	5.78749e+06
Q8VBW5	HMG box transcription factor BBX OS=Mus musculus OX=10090 GN=Bbx PE=1 SV=2 - [BBX_MOUSE]	1	5.63028e+06	0		3.5639	1.98	1	1	3.75772	1.98	1	1														#DIV/0!	1	5.63028e+06
Q9QZ15	C-type lectin domain family 4 member A OS=Mus musculus OX=10090 GN=Clec4a PE=1 SV=1 - [CLC4A_MOUSE]													1	1	5.53797e+06	0		2.37286	4.62	1	1					#DIV/0!	1	5.53797e+06
Q6GQX2	Nck-associated protein 5-like OS=Mus musculus OX=10090 GN=Nckap5l PE=1 SV=1 - [NCK5L_MOUSE]	1	5497931	0		5.33982	3.1	1	2																		#DIV/0!	1	5497931
Q812E0	Cytoplasmic polyadenylation element-binding protein 2 OS=Mus musculus OX=10090 GN=Cpeb2 PE=1 SV=1 - [CPEB2_MOUSE]	1	5.38273e+06	0		3.07718	3.07	1	1	0	2.11	1	1														#DIV/0!	1	5.38273e+06
Q7TQF7	Amphiphysin OS=Mus musculus OX=10090 GN=Amph PE=1 SV=1 - [AMPH_MOUSE]	1	1.11817e+06	0		1.71835	2.19	1	1					1	1	9.42604e+06	0		2.46776	2.19	1	1					#DIV/0!	1	5.2721e+06
Q7TMY8	E3 ubiquitin-protein ligase HUWE1 OS=Mus musculus OX=10090 GN=Huwe1 PE=1 SV=5 - [HUWE1_MOUSE]	1	5.2373e+06	0		0	0.16	1	1																		#DIV/0!	1	5.2373e+06
Q8C0Q3	Tetratricopeptide repeat protein 34 OS=Mus musculus OX=10090 GN=Ttc34 PE=2 SV=2 - [TTC34_MOUSE]													1	1	5.13185e+06	0		1.77243	1.26	1	1					#DIV/0!	1	5.13185e+06
Q7TT50	Serine/threonine-protein kinase MRCK beta OS=Mus musculus OX=10090 GN=Cdc42bpb PE=1 SV=2 - [MRCKB_MOUSE]													1	1	5.05494e+06	0		3.94833	0.99	1	1					#DIV/0!	1	5.05494e+06
O70570	Polymeric immunoglobulin receptor OS=Mus musculus OX=10090 GN=Pigr PE=1 SV=1 - [PIGR_MOUSE]													1	1	4.96126e+06	0		0	1.17	1	1					#DIV/0!	1	4.96126e+06
P04426	Proto-oncogene Wnt-1 OS=Mus musculus OX=10090 GN=Wnt1 PE=1 SV=1 - [WNT1_MOUSE]													1	1	4.95377e+06	0		2.49755	5.14	1	1					#DIV/0!	1	4.95377e+06
Q02526	Zinc finger protein 41 OS=Mus musculus OX=10090 GN=Zfp41 PE=2 SV=2 - [ZFP41_MOUSE]													1	1	4.92708e+06	0		2.23248	7.58	1	1					#DIV/0!	1	4.92708e+06
P26618	Platelet-derived growth factor receptor alpha OS=Mus musculus OX=10090 GN=Pdgfra PE=1 SV=3 - [PGFRA_MOUSE]													1	1	4.91562e+06	0		1.70265	1.01	1	1					#DIV/0!	1	4.91562e+06
Q9JIS3	Single-pass membrane and coiled-coil domain-containing protein 4 OS=Mus musculus OX=10090 GN=Smco4 PE=3 SV=2 - [SMCO4_MOUSE]	1	4.89318e+06	0		1.92881	15.25	1	1																		#DIV/0!	1	4.89318e+06
A2AAE1	Transmembrane protein KIAA1109 OS=Mus musculus OX=10090 GN=Kiaa1109 PE=1 SV=4 - [K1109_MOUSE]	1	3.67451e+06	0		0	0.7	1	1					1	1	5.94262e+06	0		1.88535	0.18	1	1					#DIV/0!	1	4.80857e+06
Q4U2R1	E3 ubiquitin-protein ligase HERC2 OS=Mus musculus OX=10090 GN=Herc2 PE=1 SV=3 - [HERC2_MOUSE]	1	4.43834e+06	0		1.92851	0.31	1	1																		#DIV/0!	1	4.43834e+06
Q5SRX1	TOM1-like protein 2 OS=Mus musculus OX=10090 GN=Tom1l2 PE=1 SV=1 - [TM1L2_MOUSE]													1	1	4.14038e+06	0		1.73365	1.58	1	1					#DIV/0!	1	4.14038e+06
Q8BQP8	Rab11 family-interacting protein 4 OS=Mus musculus OX=10090 GN=Rab11fip4 PE=1 SV=1 - [RFIP4_MOUSE]													1	1	4.01838e+06	0		2.18091	1.57	1	1					#DIV/0!	1	4.01838e+06
O08539	Myc box-dependent-interacting protein 1 OS=Mus musculus OX=10090 GN=Bin1 PE=1 SV=1 - [BIN1_MOUSE]													1	1	3.94815e+06	0		1.67383	1.7	1	1					#DIV/0!	1	3.94815e+06
A2AFR3	FERM and PDZ domain-containing protein 4 OS=Mus musculus OX=10090 GN=Frmpd4 PE=1 SV=1 - [FRPD4_MOUSE]													1	1	3.916e+06	0		2.02055	0.76	1	1					#DIV/0!	1	3.916e+06
Q68FF6	ARF GTPase-activating protein GIT1 OS=Mus musculus OX=10090 GN=Git1 PE=1 SV=1 - [GIT1_MOUSE]													1	1	3.85438e+06	0		2.12423	1.82	1	1					#DIV/0!	1	3.85438e+06
Q8BGK6	Y+L amino acid transporter 2 OS=Mus musculus OX=10090 GN=Slc7a6 PE=1 SV=1 - [YLAT2_MOUSE]	1	3.84373e+06	0		2.0253	2.91	1	1																		#DIV/0!	1	3.84373e+06
Q8C050	Ribosomal protein S6 kinase alpha-5 OS=Mus musculus OX=10090 GN=Rps6ka5 PE=1 SV=2 - [KS6A5_MOUSE]													1	1	3.84056e+06	0		2.09503	1.62	1	1					#DIV/0!	1	3.84056e+06
Q8BVF7	Gamma-secretase subunit APH-1A OS=Mus musculus OX=10090 GN=Aph1a PE=1 SV=2 - [APH1A_MOUSE]													1	1	3.76412e+06	0		1.96451	3.02	1	1					#DIV/0!	1	3.76412e+06
Q8C7M3	E3 ubiquitin-protein ligase TRIM9 OS=Mus musculus OX=10090 GN=Trim9 PE=1 SV=2 - [TRIM9_MOUSE]	1	1.57249e+06	0		0	0.86	1	1					1	1	5.75547e+06	0		1.82877	0.86	1	1					#DIV/0!	1	3.66398e+06
B1AY13	Ubiquitin carboxyl-terminal hydrolase 24 OS=Mus musculus OX=10090 GN=Usp24 PE=1 SV=1 - [UBP24_MOUSE]													1	1	3.61157e+06	0		0	0.27	1	1					#DIV/0!	1	3.61157e+06
E9Q557	Desmoplakin OS=Mus musculus OX=10090 GN=Dsp PE=1 SV=1 - [DESP_MOUSE]													2	2	3.59547e+06	0		2.15998	0.49	1	1	0	1.32	1	1	#DIV/0!	1	3.59547e+06
Q99PG4	Regulator of G-protein signaling 18 OS=Mus musculus OX=10090 GN=Rgs18 PE=1 SV=1 - [RGS18_MOUSE]	1	3534052	0		2.3839	3.4	1	1																		#DIV/0!	1	3534052
Q5NCI0	Up-regulator of cell proliferation OS=Mus musculus OX=10090 GN=Urgcp PE=2 SV=1 - [URGCP_MOUSE]													1	1	3.49929e+06	0		1.64033	0.86	1	1					#DIV/0!	1	3.49929e+06
O70556	Small proline-rich protein 2E OS=Mus musculus OX=10090 GN=Sprr2e PE=2 SV=1 - [SPR2E_MOUSE]													1	1	3.45872e+06	0		2.37207	15.79	1	1					#DIV/0!	1	3.45872e+06
A2A791	Zinc finger MYM-type protein 4 OS=Mus musculus OX=10090 GN=Zmym4 PE=1 SV=1 - [ZMYM4_MOUSE]													1	1	3.43859e+06	0		2.21813	0.52	1	1					#DIV/0!	1	3.43859e+06
P97434	Myosin phosphatase Rho-interacting protein OS=Mus musculus OX=10090 GN=Mprip PE=1 SV=2 - [MPRIP_MOUSE]	1	3.38542e+06	0		2.61097	1.07	1	1																		#DIV/0!	1	3.38542e+06
Q0VF58	Collagen alpha-1(XIX) chain OS=Mus musculus OX=10090 GN=Col19a1 PE=2 SV=2 - [COJA1_MOUSE]	1	3.31812e+06	0		3.32664	1.58	1	1																		#DIV/0!	1	3.31812e+06
Q80Z37	E3 ubiquitin-protein ligase Topors OS=Mus musculus OX=10090 GN=Topors PE=1 SV=1 - [TOPRS_MOUSE]	1	3.08778e+06	0		1.64427	0.87	1	1																		#DIV/0!	1	3.08778e+06
P51450	Nuclear receptor ROR-gamma OS=Mus musculus OX=10090 GN=Rorc PE=1 SV=1 - [RORG_MOUSE]	1	3.06877e+06	0		0	1.16	1	1																		#DIV/0!	1	3.06877e+06
P97386	DNA ligase 3 OS=Mus musculus OX=10090 GN=Lig3 PE=1 SV=2 - [DNLI3_MOUSE]	1	3.06726e+06	0		2.64266	1.18	1	1																		#DIV/0!	1	3.06726e+06
Q6ZWR4	Serine/threonine-protein phosphatase 2A 55 kDa regulatory subunit B beta isoform OS=Mus musculus OX=10090 GN=Ppp2r2b PE=1 SV=1 - [2ABB_MOUSE]													1	1	2.98856e+06	0		2.93738	3.16	1	1					#DIV/0!	1	2.98856e+06
P70208	Plexin-A3 OS=Mus musculus OX=10090 GN=Plxna3 PE=1 SV=2 - [PLXA3_MOUSE]	1	2.97127e+06	0		2.49332	1.01	1	1																		#DIV/0!	1	2.97127e+06
A6X8Z5	Rho GTPase-activating protein 31 OS=Mus musculus OX=10090 GN=Arhgap31 PE=1 SV=1 - [RHG31_MOUSE]													1	1	2.94873e+06	0		3.88063	1.96	1	1					#DIV/0!	1	2.94873e+06
O70443	Guanine nucleotide-binding protein G(z) subunit alpha OS=Mus musculus OX=10090 GN=Gnaz PE=1 SV=4 - [GNAZ_MOUSE]													1	1	2.84467e+06	0		0	2.54	1	1					#DIV/0!	1	2.84467e+06
Q62376	U1 small nuclear ribonucleoprotein 70 kDa OS=Mus musculus OX=10090 GN=Snrnp70 PE=1 SV=2 - [RU17_MOUSE]	1	2.81979e+06	0		2.19455	2.46	1	1																		#DIV/0!	1	2.81979e+06
Q9EPN1	Neurobeachin OS=Mus musculus OX=10090 GN=Nbea PE=1 SV=1 - [NBEA_MOUSE]	1	1.06922e+06	0		2.15347	0.37	1	1					1	1	4.54928e+06	0		2.44686	0.37	1	1					#DIV/0!	1	2.80925e+06
P97797	Tyrosine-protein phosphatase non-receptor type substrate 1 OS=Mus musculus OX=10090 GN=Sirpa PE=1 SV=2 - [SHPS1_MOUSE]													1	1	2.75992e+06	0		3.70361	4.09	1	1					#DIV/0!	1	2.75992e+06
E9Q3L2	Phosphatidylinositol 4-kinase alpha OS=Mus musculus OX=10090 GN=Pi4ka PE=1 SV=2 - [PI4KA_MOUSE]													1	1	2.75884e+06	0		2.77929	0.95	1	2					#DIV/0!	1	2.75884e+06
Q6EDY6	F-actin-uncapping protein LRRC16A OS=Mus musculus OX=10090 GN=Carmil1 PE=1 SV=2 - [CARL1_MOUSE]	1	2.72204e+06	0		2.6126	1.38	1	1																		#DIV/0!	1	2.72204e+06
Q9QXZ0	Microtubule-actin cross-linking factor 1 OS=Mus musculus OX=10090 GN=Macf1 PE=1 SV=2 - [MACF1_MOUSE]													1	1	2.71863e+06	0		2.67787	0.26	1	1					#DIV/0!	1	2.71863e+06
Q6NS46	Protein RRP5 homolog OS=Mus musculus OX=10090 GN=Pdcd11 PE=1 SV=2 - [RRP5_MOUSE]	1	2.67653e+06	0		4.3731	2.04	1	2																		#DIV/0!	1	2.67653e+06
Q3UUG6	TBC1 domain family member 24 OS=Mus musculus OX=10090 GN=Tbc1d24 PE=1 SV=2 - [TBC24_MOUSE]													1	1	2.66006e+06	0		0	1.25	1	1					#DIV/0!	1	2.66006e+06
Q8JZN7	Mitochondrial Rho GTPase 2 OS=Mus musculus OX=10090 GN=Rhot2 PE=1 SV=1 - [MIRO2_MOUSE]													1	1	2.64171e+06	0		1.75422	1.61	1	1					#DIV/0!	1	2.64171e+06
Q80YD1	ATP-dependent RNA helicase SUPV3L1, mitochondrial OS=Mus musculus OX=10090 GN=Supv3l1 PE=1 SV=1 - [SUV3_MOUSE]													1	1	2.64065e+06	0		2.17886	1.8	1	1					#DIV/0!	1	2.64065e+06
Q14BI2	Metabotropic glutamate receptor 2 OS=Mus musculus OX=10090 GN=Grm2 PE=1 SV=2 - [GRM2_MOUSE]													1	1	2.60607e+06	0		0	0.8	1	1					#DIV/0!	1	2.60607e+06
Q64096	Guanine nucleotide exchange factor DBS OS=Mus musculus OX=10090 GN=Mcf2l PE=1 SV=2 - [MCF2L_MOUSE]	1	2.54726e+06	0		0	0.87	1	1																		#DIV/0!	1	2.54726e+06
Q925I1	ATPase family AAA domain-containing protein 3 OS=Mus musculus OX=10090 GN=Atad3 PE=1 SV=1 - [ATAD3_MOUSE]													1	1	2.51706e+06	0		0	1.18	1	1					#DIV/0!	1	2.51706e+06
Q8C854	Myelin expression factor 2 OS=Mus musculus OX=10090 GN=Myef2 PE=1 SV=1 - [MYEF2_MOUSE]													1	1	2.32787e+06	0		0	2.2	1	1					#DIV/0!	1	2.32787e+06
P97820	Mitogen-activated protein kinase kinase kinase kinase 4 OS=Mus musculus OX=10090 GN=Map4k4 PE=1 SV=1 - [M4K4_MOUSE]	1	2.27941e+06	0		0	0.57	1	1																		#DIV/0!	1	2.27941e+06
Q9ES28	Rho guanine nucleotide exchange factor 7 OS=Mus musculus OX=10090 GN=Arhgef7 PE=1 SV=2 - [ARHG7_MOUSE]													1	1	2.25549e+06	0		2.42056	1.16	1	1					#DIV/0!	1	2.25549e+06
O55142	60S ribosomal protein L35a OS=Mus musculus OX=10090 GN=Rpl35a PE=1 SV=2 - [RL35A_MOUSE]													1	1	2.19734e+06	0		0	10.91	1	1					#DIV/0!	1	2.19734e+06
Q0VFX2	Cilia- and flagella-associated protein 157 OS=Mus musculus OX=10090 GN=Cfap157 PE=1 SV=1 - [CF157_MOUSE]													1	1	2.11014e+06	0		3.80831	4.97	1	1	2.33459	4.97	1	1	#DIV/0!	1	2.11014e+06
Q6NVF9	Cleavage and polyadenylation specificity factor subunit 6 OS=Mus musculus OX=10090 GN=Cpsf6 PE=1 SV=1 - [CPSF6_MOUSE]	1	2.02725e+06	0		4.09498	4.54	1	1																		#DIV/0!	1	2.02725e+06
Q62312	TGF-beta receptor type-2 OS=Mus musculus OX=10090 GN=Tgfbr2 PE=1 SV=1 - [TGFR2_MOUSE]	1	2.01368e+06	0		1.83739	1.35	1	1																		#DIV/0!	1	2.01368e+06
Q05CL8	La-related protein 7 OS=Mus musculus OX=10090 GN=Larp7 PE=1 SV=2 - [LARP7_MOUSE]	1	2.00215e+06	0		1.99701	2.11	1	1																		#DIV/0!	1	2.00215e+06
Q8R4K8	Pappalysin-1 OS=Mus musculus OX=10090 GN=Pappa PE=2 SV=2 - [PAPP1_MOUSE]													1	1	1.97289e+06	0		3.27616	1.05	1	1					#DIV/0!	1	1.97289e+06
Q8CFZ4	Glypican-3 OS=Mus musculus OX=10090 GN=Gpc3 PE=1 SV=1 - [GPC3_MOUSE]													1	1	1.9361e+06	0		2.65659	3.11	1	1					#DIV/0!	1	1.9361e+06
Q9Z282	Probable G-protein coupled receptor 132 OS=Mus musculus OX=10090 GN=Gpr132 PE=1 SV=1 - [GP132_MOUSE]	1	1.93117e+06	0		2.94556	6.02	1	1																		#DIV/0!	1	1.93117e+06
O54824	Pro-interleukin-16 OS=Mus musculus OX=10090 GN=Il16 PE=1 SV=3 - [IL16_MOUSE]	1	1.91238e+06	0		1.68102	0.53	1	1																		#DIV/0!	1	1.91238e+06
Q6P5D4	Centrosomal protein of 135 kDa OS=Mus musculus OX=10090 GN=Cep135 PE=1 SV=1 - [CP135_MOUSE]	1	1.8919e+06	0		3.28549	1.14	1	1																		#DIV/0!	1	1.8919e+06
Q9JIF7	Coatomer subunit beta OS=Mus musculus OX=10090 GN=Copb1 PE=1 SV=1 - [COPB_MOUSE]													1	1	1.79298e+06	0		1.98342	1.05	1	1					#DIV/0!	1	1.79298e+06
P97358	TATA box-binding protein-associated factor RNA polymerase I subunit B OS=Mus musculus OX=10090 GN=Taf1b PE=1 SV=2 - [TAF1B_MOUSE]													1	1	1.72619e+06	0		2.83973	2.05	1	1					#DIV/0!	1	1.72619e+06
Q62137	Tyrosine-protein kinase JAK3 OS=Mus musculus OX=10090 GN=Jak3 PE=1 SV=2 - [JAK3_MOUSE]	1	1.66659e+06	0		0	1.45	1	1																		#DIV/0!	1	1.66659e+06
P0CL69	Zinc finger protein 703 OS=Mus musculus OX=10090 GN=Znf703 PE=1 SV=1 - [ZN703_MOUSE]	1	1656887	0		0	2.19	1	1																		#DIV/0!	1	1656887
Q569L8	Centromere protein J OS=Mus musculus OX=10090 GN=Cenpj PE=2 SV=2 - [CENPJ_MOUSE]	1	1.65345e+06	0		0	0.67	1	1																		#DIV/0!	1	1.65345e+06
Q91ZQ1	Cone cGMP-specific 3',5'-cyclic phosphodiesterase subunit alpha' OS=Mus musculus OX=10090 GN=Pde6c PE=2 SV=1 - [PDE6C_MOUSE]													1	1	1.55516e+06	0		3.1898	1.97	1	1					#DIV/0!	1	1.55516e+06
P61211	ADP-ribosylation factor-like protein 1 OS=Mus musculus OX=10090 GN=Arl1 PE=1 SV=1 - [ARL1_MOUSE]													1	1	1.54318e+06	0		2.27259	6.08	1	1					#DIV/0!	1	1.54318e+06
Q8CGC7	Bifunctional glutamate/proline--tRNA ligase OS=Mus musculus OX=10090 GN=Eprs1 PE=1 SV=4 - [SYEP_MOUSE]													1	1	1.50607e+06	0		1.67134	1.19	1	1					#DIV/0!	1	1.50607e+06
P59326	YTH domain-containing family protein 1 OS=Mus musculus OX=10090 GN=Ythdf1 PE=1 SV=1 - [YTHD1_MOUSE]													1	1	1.48105e+06	0		2.97105	2.33	1	1					#DIV/0!	1	1.48105e+06
F6XZJ7	Sterile alpha motif domain-containing protein 15 OS=Mus musculus OX=10090 GN=Samd15 PE=4 SV=2 - [SAM15_MOUSE]	1	1.43686e+06	0		1.82466	1.77	1	1																		#DIV/0!	1	1.43686e+06
Q505D9	Tripartite motif-containing protein 67 OS=Mus musculus OX=10090 GN=Trim67 PE=2 SV=1 - [TRI67_MOUSE]													1	1	1.43672e+06	0		2.27688	1.43	1	1					#DIV/0!	1	1.43672e+06
Q69ZW3	EH domain-binding protein 1 OS=Mus musculus OX=10090 GN=Ehbp1 PE=1 SV=3 - [EHBP1_MOUSE]													1	1	1.43273e+06	0		1.83767	0.89	1	1					#DIV/0!	1	1.43273e+06
Q3U9G9	Delta(14)-sterol reductase LBR OS=Mus musculus OX=10090 GN=Lbr PE=1 SV=2 - [LBR_MOUSE]	1	1.40764e+06	0		2.98798	2.4	1	1																		#DIV/0!	1	1.40764e+06
Q80U72	Protein scribble homolog OS=Mus musculus OX=10090 GN=Scrib PE=1 SV=2 - [SCRIB_MOUSE]													1	1	1.35616e+06	0		1.60405	0.74	1	1					#DIV/0!	1	1.35616e+06
Q5SXJ3	Fanconi anemia group J protein homolog OS=Mus musculus OX=10090 GN=Brip1 PE=2 SV=1 - [FANCJ_MOUSE]	1	1.32402e+06	0		2.00125	0.94	1	1																		#DIV/0!	1	1.32402e+06
Q9CQD7	phospholipase A2 inhibitor and Ly6/PLAUR domain-containing protein OS=Mus musculus OX=10090 GN=Pinlyp PE=2 SV=1 - [PINLY_MOUSE]													1	1	1.27282e+06	0		3.54604	8.96	1	1					#DIV/0!	1	1.27282e+06
A2A6A1	G patch domain-containing protein 8 OS=Mus musculus OX=10090 GN=Gpatch8 PE=1 SV=1 - [GPTC8_MOUSE]	2	1.26554e+06	0		2.27592	0.86	1	1	2.52043	0.73	1	1														#DIV/0!	1	1.26554e+06
Q9JM52	Misshapen-like kinase 1 OS=Mus musculus OX=10090 GN=Mink1 PE=1 SV=3 - [MINK1_MOUSE]													1	1	1.25074e+06	0		1.81756	0.76	1	1					#DIV/0!	1	1.25074e+06
Q91WJ0	Fibroblast growth factor receptor substrate 3 OS=Mus musculus OX=10090 GN=Frs3 PE=1 SV=3 - [FRS3_MOUSE]													1	1	1.22282e+06	0		0	1.42	1	1					#DIV/0!	1	1.22282e+06
P62334	26S proteasome regulatory subunit 10B OS=Mus musculus OX=10090 GN=Psmc6 PE=1 SV=1 - [PRS10_MOUSE]	1	1209104	0		1.88342	1.54	1	1																		#DIV/0!	1	1209104
Q8BUI3	Leucine-rich repeat and WD repeat-containing protein 1 OS=Mus musculus OX=10090 GN=LRWD1 PE=2 SV=1 - [LRWD1_MOUSE]	1	1.2055e+06	0		3.86452	2.78	1	1																		#DIV/0!	1	1.2055e+06
Q91ZV0	Melanoma inhibitory activity protein 2 OS=Mus musculus OX=10090 GN=Mia2 PE=1 SV=3 - [MIA2_MOUSE]	1	1.17783e+06	0		2.93467	1.07	1	1																		#DIV/0!	1	1.17783e+06
Q99LI5	Zinc finger protein 281 OS=Mus musculus OX=10090 GN=Znf281 PE=1 SV=1 - [ZN281_MOUSE]													1	1	1.0876e+06	0		0	1.12	1	1					#DIV/0!	1	1.0876e+06
Q0VBL6	Hypoxia-inducible factor 3-alpha OS=Mus musculus OX=10090 GN=Hif3a PE=1 SV=2 - [HIF3A_MOUSE]	1	943233	0		4.75044	4.68	1	1																		#DIV/0!	1	943233
Q60749	KH domain-containing, RNA-binding, signal transduction-associated protein 1 OS=Mus musculus OX=10090 GN=Khdrbs1 PE=1 SV=2 - [KHDR1_MOUSE]	1	929743	0		1.97021	2.26	1	1																		#DIV/0!	1	929743
Q9QXL1	Kinesin-like protein KIF21B OS=Mus musculus OX=10090 GN=Kif21b PE=1 SV=2 - [KI21B_MOUSE]													1	1	917916	0		2.24882	0.78	1	1					#DIV/0!	1	917916
Q61315	Adenomatous polyposis coli protein OS=Mus musculus OX=10090 GN=Apc PE=1 SV=1 - [APC_MOUSE]													1	1	910810	0		0	0.35	1	1					#DIV/0!	1	910810
Q68ED3	Terminal nucleotidyltransferase 4B OS=Mus musculus OX=10090 GN=Tent4b PE=1 SV=2 - [PAPD5_MOUSE]	1	902819	0		3.104	2.69	1	1																		#DIV/0!	1	902819
P40124	Adenylyl cyclase-associated protein 1 OS=Mus musculus OX=10090 GN=Cap1 PE=1 SV=4 - [CAP1_MOUSE]	1	865274	0		2.55077	5.27	1	1																		#DIV/0!	1	865274
B2RWS6	Histone acetyltransferase p300 OS=Mus musculus OX=10090 GN=Ep300 PE=1 SV=2 - [EP300_MOUSE]	1	861451	0		3.55143	0.95	1	1																		#DIV/0!	1	861451
Q99NB9	Splicing factor 3B subunit 1 OS=Mus musculus OX=10090 GN=Sf3b1 PE=1 SV=1 - [SF3B1_MOUSE]													1	1	841184	0		0	1.23	1	1					#DIV/0!	1	841184
Q8CFS6	Potassium voltage-gated channel subfamily V member 2 OS=Mus musculus OX=10090 GN=Kcnv2 PE=2 SV=1 - [KCNV2_MOUSE]													1	1	830474	0		0	1.25	1	1					#DIV/0!	1	830474
Q6NVE9	Protein phosphatase PTC7 homolog OS=Mus musculus OX=10090 GN=Pptc7 PE=1 SV=1 - [PPTC7_MOUSE]	1	808909	0		3.06606	10.97	1	1																		#DIV/0!	1	808909
Q641K1	Cytosolic carboxypeptidase 1 OS=Mus musculus OX=10090 GN=Agtpbp1 PE=1 SV=2 - [CBPC1_MOUSE]	1	802767	0		2.42899	0.9	1	1																		#DIV/0!	1	802767
P23819	Glutamate receptor 2 OS=Mus musculus OX=10090 GN=Gria2 PE=1 SV=3 - [GRIA2_MOUSE]	1	767730	0		3.35695	2.27	1	1																		#DIV/0!	1	767730
Q91YM2	Rho GTPase-activating protein 35 OS=Mus musculus OX=10090 GN=Arhgap35 PE=1 SV=3 - [RHG35_MOUSE]													1	1	752911	0		0	0.67	1	1					#DIV/0!	1	752911
Q8C9B9	Death-inducer obliterator 1 OS=Mus musculus OX=10090 GN=Dido1 PE=1 SV=4 - [DIDO1_MOUSE]	1	728141	0		2.95649	0.62	1	1																		#DIV/0!	1	728141
Q80Z25	Oral-facial-digital syndrome 1 protein homolog OS=Mus musculus OX=10090 GN=Ofd1 PE=1 SV=1 - [OFD1_MOUSE]	1	714659	0		2.45146	1.08	1	1																		#DIV/0!	1	714659
P97432	Next to BRCA1 gene 1 protein OS=Mus musculus OX=10090 GN=Nbr1 PE=1 SV=1 - [NBR1_MOUSE]	1	608828	0		2.78016	1.82	1	1																		#DIV/0!	1	608828
P18181	CD48 antigen OS=Mus musculus OX=10090 GN=Cd48 PE=1 SV=1 - [CD48_MOUSE]	1	465835	0		4.78107	17.5	1	1																		#DIV/0!	1	465835
Q6P542	ATP-binding cassette sub-family F member 1 OS=Mus musculus OX=10090 GN=Abcf1 PE=1 SV=1 - [ABCF1_MOUSE]	1	426587	0		2.1388	1.19	1	1																		#DIV/0!	1	426587
O70394	Interleukin-27 receptor subunit alpha OS=Mus musculus OX=10090 GN=Il27ra PE=2 SV=2 - [I27RA_MOUSE]													1	1	406235	0		3.87204	5.62	1	1					#DIV/0!	1	406235
Q04690	Neurofibromin OS=Mus musculus OX=10090 GN=Nf1 PE=1 SV=1 - [NF1_MOUSE]													1	1	400515	0		2.31	0.35	1	1					#DIV/0!	1	400515
Q9Z2V6	Histone deacetylase 5 OS=Mus musculus OX=10090 GN=Hdac5 PE=1 SV=2 - [HDAC5_MOUSE]	1	372098	0		3.79333	1.98	1	1																		#DIV/0!	1	372098
Q3UTJ2	Sorbin and SH3 domain-containing protein 2 OS=Mus musculus OX=10090 GN=Sorbs2 PE=1 SV=2 - [SRBS2_MOUSE]													1	1	335743	0		2.84839	2.03	1	1					#DIV/0!	1	335743
Q9EQJ9	Membrane-associated guanylate kinase, WW and PDZ domain-containing protein 3 OS=Mus musculus OX=10090 GN=Magi3 PE=1 SV=2 - [MAGI3_MOUSE]													1	1	319633	0		1.67519	0.75	1	1					#DIV/0!	1	319633
Q8CGM2	Retinitis pigmentosa 1-like 1 protein OS=Mus musculus OX=10090 GN=Rp1l1 PE=1 SV=1 - [RP1L1_MOUSE]	1	300655	0		0	0.7	1	1																		#DIV/0!	1	300655
P59242	Cingulin OS=Mus musculus OX=10090 GN=Cgn PE=1 SV=1 - [CING_MOUSE]	1	277798	0		1.82883	0.84	1	1																		#DIV/0!	1	277798
Q3UH68	LIM and calponin homology domains-containing protein 1 OS=Mus musculus OX=10090 GN=Limch1 PE=1 SV=2 - [LIMC1_MOUSE]													1	1	207088	0		0	0.66	1	1					#DIV/0!	1	207088
Q62445	Transcription factor Sp4 OS=Mus musculus OX=10090 GN=Sp4 PE=2 SV=2 - [SP4_MOUSE]													1	1	140010	0		1.76204	1.15	1	1					#DIV/0!	1	140010
P39655	Polyunsaturated fatty acid lipoxygenase ALOX12 OS=Mus musculus OX=10090 GN=Alox12 PE=1 SV=4 - [LOX12_MOUSE]	1	138258	0		3.81559	4.07	1	1																		#DIV/0!	1	138258
A3KGF9	Coiled-coil domain-containing protein 9B OS=Mus musculus OX=10090 GN=Ccdc9b PE=1 SV=1 - [CCD9B_MOUSE]													1	1	0	0		0	1.47	1	1					#DIV/0!	1	0
B7ZNG4	Tastin OS=Mus musculus OX=10090 GN=Troap PE=2 SV=1 - [TROAP_MOUSE]	1	0	0		2.18165	1.2	1	1																		#DIV/0!	1	0
E9Q0C6	Acrosomal protein KIAA1210 OS=Mus musculus OX=10090 GN=Kiaa1210 PE=1 SV=1 - [K1210_MOUSE]													1	1	0	0		0	0.43	1	1					#DIV/0!	1	0
E9Q5M6	Cilia- and flagella-associated protein 44 OS=Mus musculus OX=10090 GN=Cfap44 PE=2 SV=1 - [CFA44_MOUSE]													1	1	0	0		7.13299	1.03	1	3	2.9962	1.03	1	1	#DIV/0!	1	0
E9QAT4	Protein transport protein Sec16A OS=Mus musculus OX=10090 GN=Sec16a PE=1 SV=1 - [SC16A_MOUSE]	1	0	0		3.69685	1.02	1	1																		#DIV/0!	1	0
O08665	Semaphorin-3A OS=Mus musculus OX=10090 GN=Sema3a PE=1 SV=2 - [SEM3A_MOUSE]													1	1	0	0		2.54184	2.46	1	1					#DIV/0!	1	0
O35435	Dihydroorotate dehydrogenase (quinone), mitochondrial OS=Mus musculus OX=10090 GN=Dhodh PE=1 SV=2 - [PYRD_MOUSE]													1	1	0	0		3.48877	9.62	1	1					#DIV/0!	1	0
O35516	Neurogenic locus notch homolog protein 2 OS=Mus musculus OX=10090 GN=Notch2 PE=1 SV=2 - [NOTC2_MOUSE]	1	0	0		2.36296	0.73	1	1	2.2775	0.73	1	1														#DIV/0!	1	0
O54827	Probable phospholipid-transporting ATPase VA OS=Mus musculus OX=10090 GN=Atp10a PE=1 SV=4 - [AT10A_MOUSE]	1	0	0		2.74586	1.19	1	1																		#DIV/0!	1	0
P01029	Complement C4-B OS=Mus musculus OX=10090 GN=C4b PE=1 SV=3 - [CO4B_MOUSE]	1	0	0		5.51772	2.13	1	1																		#DIV/0!	1	0
P12970	60S ribosomal protein L7a OS=Mus musculus OX=10090 GN=Rpl7a PE=1 SV=2 - [RL7A_MOUSE]	1	0	0		3.36681	9.02	1	1																		#DIV/0!	1	0
P13516	Acyl-CoA desaturase 1 OS=Mus musculus OX=10090 GN=Scd1 PE=1 SV=2 - [ACOD1_MOUSE]													1	1	0	0		0	4.51	1	1					#DIV/0!	1	0
P28738	Kinesin heavy chain isoform 5C OS=Mus musculus OX=10090 GN=Kif5c PE=1 SV=3 - [KIF5C_MOUSE]	1	0	0		3.28771	2.09	1	1																		#DIV/0!	1	0
P30558	Proteinase-activated receptor 1 OS=Mus musculus OX=10090 GN=F2r PE=1 SV=2 - [PAR1_MOUSE]	1	0	0		4.37204	6.05	1	1																		#DIV/0!	1	0
P35294	Ras-related protein Rab-19 OS=Mus musculus OX=10090 GN=Rab19 PE=1 SV=3 - [RAB19_MOUSE]													1	1	0	0		0	3.69	1	1					#DIV/0!	1	0
P41149	Melanocortin receptor 5 OS=Mus musculus OX=10090 GN=Mc5r PE=2 SV=1 - [MC5R_MOUSE]													1	1	0	0		2.81225	11.69	1	1					#DIV/0!	1	0
P47962	60S ribosomal protein L5 OS=Mus musculus OX=10090 GN=Rpl5 PE=1 SV=3 - [RL5_MOUSE]													1	1	0	0		3.00236	6.06	1	1					#DIV/0!	1	0
P48755	Fos-related antigen 1 OS=Mus musculus OX=10090 GN=Fosl1 PE=2 SV=2 - [FOSL1_MOUSE]	1	0	0		3.21126	8.06	1	1																		#DIV/0!	1	0
P62196	26S proteasome regulatory subunit 8 OS=Mus musculus OX=10090 GN=Psmc5 PE=1 SV=1 - [PRS8_MOUSE]													2	2	0	0		2.23962	3.2	1	1	2.05399	1.72	1	1	#DIV/0!	1	0
P97303	Transcription regulator protein BACH2 OS=Mus musculus OX=10090 GN=Bach2 PE=1 SV=3 - [BACH2_MOUSE]													1	1	0	0		0	2.5	1	1					#DIV/0!	1	0
Q3TNU4	Putative uncharacterized protein ENSP00000382790 homolog OS=Mus musculus OX=10090 GN=Gm3414 PE=5 SV=1 - [YD021_MOUSE]	1	0	0		3.06035	2.91	1	1																		#DIV/0!	1	0
Q3UH06	Ras-responsive element-binding protein 1 OS=Mus musculus OX=10090 GN=Rreb1 PE=1 SV=2 - [RREB1_MOUSE]													1	1	0	0		2.51496	1.12	1	1					#DIV/0!	1	0
Q3UH53	Protein sidekick-1 OS=Mus musculus OX=10090 GN=Sdk1 PE=1 SV=1 - [SDK1_MOUSE]	1	0	0		4.25446	1.82	1	1																		#DIV/0!	1	0
Q3UH66	Serine/threonine-protein kinase WNK2 OS=Mus musculus OX=10090 GN=Wnk2 PE=1 SV=2 - [WNK2_MOUSE]													1	1	0	0		1.66335	0.33	1	1					#DIV/0!	1	0
Q3UUE9	Protein ANKUB1 OS=Mus musculus OX=10090 GN=Ankub1 PE=2 SV=1 - [ANKUB_MOUSE]	1	0	0		3.57676	17.19	1	1																		#DIV/0!	1	0
Q50H33	BTB/POZ domain-containing protein KCTD8 OS=Mus musculus OX=10090 GN=Kctd8 PE=1 SV=1 - [KCTD8_MOUSE]	1	0	0		3.84839	5.88	1	1																		#DIV/0!	1	0
Q571H0	Nucleolar pre-ribosomal-associated protein 1 OS=Mus musculus OX=10090 GN=Urb1 PE=1 SV=2 - [NPA1P_MOUSE]													1	1	0	0		3.20192	1.14	1	2					#DIV/0!	1	0
Q5F2F2	Protein ABHD15 OS=Mus musculus OX=10090 GN=Abhd15 PE=1 SV=1 - [ABH15_MOUSE]													1	1	0	0		2.13868	1.96	1	1					#DIV/0!	1	0
Q5U405	Transmembrane protease serine 13 OS=Mus musculus OX=10090 GN=Tmprss13 PE=2 SV=2 - [TMPSD_MOUSE]													1	1	0	0		1.64318	3.31	1	1					#DIV/0!	1	0
Q5U5Q9	BRCA1-A complex subunit RAP80 OS=Mus musculus OX=10090 GN=Uimc1 PE=1 SV=2 - [UIMC1_MOUSE]													1	1	0	0		0	2.48	1	1					#DIV/0!	1	0
Q5XJV7	Histone-lysine N-methyltransferase SETD5 OS=Mus musculus OX=10090 GN=Setd5 PE=1 SV=2 - [SETD5_MOUSE]													1	1	0	0		2.71669	1.32	1	1					#DIV/0!	1	0
Q60592	Microtubule-associated serine/threonine-protein kinase 2 OS=Mus musculus OX=10090 GN=Mast2 PE=1 SV=1 - [MAST2_MOUSE]	2	0	0		3.98231	2.13	1	3	1.96467	0.63	1	1														#DIV/0!	1	0
Q60847	Collagen alpha-1(XII) chain OS=Mus musculus OX=10090 GN=Col12a1 PE=2 SV=3 - [COCA1_MOUSE]													1	1	0	0		1.70987	0.54	1	1					#DIV/0!	1	0
Q61033	Lamina-associated polypeptide 2, isoforms alpha/zeta OS=Mus musculus OX=10090 GN=Tmpo PE=1 SV=4 - [LAP2A_MOUSE]													1	1	0	0		0	0.87	1	1					#DIV/0!	1	0
Q61062	Segment polarity protein dishevelled homolog DVL-3 OS=Mus musculus OX=10090 GN=Dvl3 PE=1 SV=2 - [DVL3_MOUSE]													1	1	0	0		1.98495	1.68	1	1					#DIV/0!	1	0
Q61097	Kinase suppressor of Ras 1 OS=Mus musculus OX=10090 GN=Ksr1 PE=1 SV=1 - [KSR1_MOUSE]	1	0	0		2.17201	1.15	1	1																		#DIV/0!	1	0
Q61115	Protein patched homolog 1 OS=Mus musculus OX=10090 GN=Ptch1 PE=1 SV=1 - [PTC1_MOUSE]	1	0	0		4.27626	3.28	1	2																		#DIV/0!	1	0
Q61702	Inter-alpha-trypsin inhibitor heavy chain H1 OS=Mus musculus OX=10090 GN=Itih1 PE=1 SV=2 - [ITIH1_MOUSE]	1	0	0		2.60757	1.98	1	1																		#DIV/0!	1	0
Q69Z37	Sterile alpha motif domain-containing protein 9-like OS=Mus musculus OX=10090 GN=Samd9l PE=1 SV=2 - [SAM9L_MOUSE]	1	0	0		1.66108	0.58	1	1																		#DIV/0!	1	0
Q6P2B1	Transportin-3 OS=Mus musculus OX=10090 GN=Tnpo3 PE=1 SV=1 - [TNPO3_MOUSE]	1	0	0		1.71918	0.87	1	2	0	0.87	1	1	1	1	0	0		0	0.87	1	3					#DIV/0!	1	0
Q6P9P6	Kinesin-like protein KIF11 OS=Mus musculus OX=10090 GN=Kif11 PE=1 SV=1 - [KIF11_MOUSE]													1	1	0	0		0	0.95	1	1					#DIV/0!	1	0
Q6PB44	Tyrosine-protein phosphatase non-receptor type 23 OS=Mus musculus OX=10090 GN=Ptpn23 PE=1 SV=2 - [PTN23_MOUSE]													1	1	0	0		0	0.47	1	1					#DIV/0!	1	0
Q6PFR5	Transformer-2 protein homolog alpha OS=Mus musculus OX=10090 GN=Tra2a PE=1 SV=1 - [TRA2A_MOUSE]	1	0	0		2.6438	4.98	1	1																		#DIV/0!	1	0
Q6PHS6	Sorting nexin-13 OS=Mus musculus OX=10090 GN=Snx13 PE=2 SV=1 - [SNX13_MOUSE]	1	0	0		3.69751	1.99	1	1																		#DIV/0!	1	0
Q6VVW5	Atrial natriuretic peptide receptor 2 OS=Mus musculus OX=10090 GN=Npr2 PE=1 SV=2 - [ANPRB_MOUSE]													1	1	0	0		3.04356	2.1	1	1					#DIV/0!	1	0
Q78DX7	Proto-oncogene tyrosine-protein kinase ROS OS=Mus musculus OX=10090 GN=Ros1 PE=1 SV=1 - [ROS1_MOUSE]													1	1	0	0		2.41384	0.64	1	1					#DIV/0!	1	0
Q80TE0	RNA polymerase II-associated protein 1 OS=Mus musculus OX=10090 GN=Rpap1 PE=1 SV=2 - [RPAP1_MOUSE]													1	1	0	0		3.64477	1.92	1	1					#DIV/0!	1	0
Q80TR1	Adhesion G protein-coupled receptor L1 OS=Mus musculus OX=10090 GN=Adgrl1 PE=1 SV=2 - [AGRL1_MOUSE]													1	1	0	0		2.61329	1.3	1	1					#DIV/0!	1	0
Q810T2	G2/mitotic-specific cyclin-B3 OS=Mus musculus OX=10090 GN=Ccnb3 PE=1 SV=2 - [CCNB3_MOUSE]	1	0	0		3.08357	1.07	1	1																		#DIV/0!	1	0
Q8BGV5	Zinc finger protein 8 OS=Mus musculus OX=10090 GN=Znf8 PE=1 SV=1 - [ZNF8_MOUSE]													1	1	0	0		2.24544	1.92	1	1					#DIV/0!	1	0
Q8BLX7	Collagen alpha-1(XVI) chain OS=Mus musculus OX=10090 GN=Col16a1 PE=1 SV=2 - [COGA1_MOUSE]	1	0	0		6.78754	1.46	1	2																		#DIV/0!	1	0
Q8BQ30	Phostensin OS=Mus musculus OX=10090 GN=Ppp1r18 PE=1 SV=1 - [PPR18_MOUSE]													1	1	0	0		1.63416	1.68	1	1					#DIV/0!	1	0
Q8BVG5	Polypeptide N-acetylgalactosaminyltransferase 14 OS=Mus musculus OX=10090 GN=Galnt14 PE=2 SV=2 - [GLT14_MOUSE]	1	0	0		0	3.82	1	1																		#DIV/0!	1	0
Q8BWU1	Shadow of prion protein OS=Mus musculus OX=10090 GN=Sprn PE=1 SV=1 - [SPRN_MOUSE]	1	0	0		3.54243	17.01	1	1																		#DIV/0!	1	0
Q8C0P7	E3 SUMO-protein ligase ZNF451 OS=Mus musculus OX=10090 GN=Znf451 PE=1 SV=1 - [ZN451_MOUSE]	1	0	0		3.08247	1.61	1	1																		#DIV/0!	1	0
Q8C3X4	Translation factor Guf1, mitochondrial OS=Mus musculus OX=10090 GN=Guf1 PE=1 SV=1 - [GUF1_MOUSE]													1	1	0	0		0	1.08	1	1					#DIV/0!	1	0
Q8CDG3	Deubiquitinating protein VCPIP1 OS=Mus musculus OX=10090 GN=Vcpip1 PE=1 SV=1 - [VCIP1_MOUSE]													1	1	0	0		0	0.57	1	1					#DIV/0!	1	0
Q8CDV6	Coiled-coil domain-containing protein 63 OS=Mus musculus OX=10090 GN=Ccdc63 PE=2 SV=2 - [CCD63_MOUSE]													1	1	0	0		2.01401	2.33	1	1					#DIV/0!	1	0
Q8CG16	Complement C1r-A subcomponent OS=Mus musculus OX=10090 GN=C1ra PE=1 SV=1 - [C1RA_MOUSE]													1	1	0	0		0	4.95	1	1					#DIV/0!	1	0
Q8CG65	SCO-spondin OS=Mus musculus OX=10090 GN=Sspo PE=2 SV=2 - [SSPO_MOUSE]	1	0	0		0	0.44	1	2																		#DIV/0!	1	0
Q8CJ40	Rootletin OS=Mus musculus OX=10090 GN=Crocc PE=1 SV=2 - [CROCC_MOUSE]													1	1	0	0		0	0.35	1	1					#DIV/0!	1	0
Q8K1I7	WAS/WASL-interacting protein family member 1 OS=Mus musculus OX=10090 GN=Wipf1 PE=1 SV=1 - [WIPF1_MOUSE]	1	0	0		3.434	3.25	1	3																		#DIV/0!	1	0
Q8K2I9	F-box DNA helicase 1 OS=Mus musculus OX=10090 GN=Fbh1 PE=1 SV=1 - [FBH1_MOUSE]													1	1	0	0		0	1.82	1	1					#DIV/0!	1	0
Q8K3I9	Glucocorticoid-induced transcript 1 protein OS=Mus musculus OX=10090 GN=Glcci1 PE=1 SV=1 - [GLCI1_MOUSE]	1	0	0		4.5705	6.33	1	1																		#DIV/0!	1	0
Q8K4Q8	Collectin-12 OS=Mus musculus OX=10090 GN=Colec12 PE=1 SV=1 - [COL12_MOUSE]													1	1	0	0		1.86325	0.94	1	1					#DIV/0!	1	0
Q8K4S1	1-phosphatidylinositol 4,5-bisphosphate phosphodiesterase epsilon-1 OS=Mus musculus OX=10090 GN=Plce1 PE=1 SV=3 - [PLCE1_MOUSE]	1	0	0		3.47656	1.1	1	1																		#DIV/0!	1	0
Q8R526	Polycystic kidney disease protein 1-like 1 OS=Mus musculus OX=10090 GN=Pkd1l1 PE=1 SV=2 - [PK1L1_MOUSE]	1	0	0		3.1755	0.84	1	1																		#DIV/0!	1	0
Q8VBU8	Protein BANP OS=Mus musculus OX=10090 GN=Banp PE=1 SV=1 - [BANP_MOUSE]													1	1	0	0		3.50649	5.47	1	1					#DIV/0!	1	0
Q8VDH1	F-box only protein 21 OS=Mus musculus OX=10090 GN=Fbxo21 PE=1 SV=1 - [FBX21_MOUSE]													1	1	0	0		3.17016	4.15	1	1					#DIV/0!	1	0
Q8VFD0	Olfactory receptor 486 OS=Mus musculus OX=10090 GN=Olfr486 PE=3 SV=1 - [OL486_MOUSE]	1	0	0		4.9921	10.83	1	1																		#DIV/0!	1	0
Q8VHY0	Chondroitin sulfate proteoglycan 4 OS=Mus musculus OX=10090 GN=Cspg4 PE=1 SV=3 - [CSPG4_MOUSE]	1	0	0		2.52788	0.6	1	1																		#DIV/0!	1	0
Q91WK7	Ankyrin repeat domain-containing protein 54 OS=Mus musculus OX=10090 GN=Ankrd54 PE=1 SV=1 - [ANR54_MOUSE]													1	1	0	0		0	4.35	1	1					#DIV/0!	1	0
Q91YE3	Egl nine homolog 1 OS=Mus musculus OX=10090 GN=Egln1 PE=1 SV=2 - [EGLN1_MOUSE]	1	0	0		3.29727	5.75	1	1																		#DIV/0!	1	0
Q920Q2	DNA repair protein REV1 OS=Mus musculus OX=10090 GN=Rev1 PE=1 SV=1 - [REV1_MOUSE]	1	0	0		3.25678	1.44	1	1																		#DIV/0!	1	0
Q921F2	TAR DNA-binding protein 43 OS=Mus musculus OX=10090 GN=Tardbp PE=1 SV=1 - [TADBP_MOUSE]													1	1	0	0		3.58113	4.35	1	1	3.76104	4.35	1	1	#DIV/0!	1	0
Q99PQ2	E3 ubiquitin-protein ligase TRIM11 OS=Mus musculus OX=10090 GN=Trim11 PE=1 SV=1 - [TRI11_MOUSE]													1	1	0	0		0	3.85	1	1					#DIV/0!	1	0
Q99PT3	INO80 complex subunit B OS=Mus musculus OX=10090 GN=Ino80b PE=1 SV=2 - [IN80B_MOUSE]	1	0	0		3.17298	3.2	1	1	2.59699	3.2	1	1														#DIV/0!	1	0
Q9CWK8	Sorting nexin-2 OS=Mus musculus OX=10090 GN=Snx2 PE=1 SV=2 - [SNX2_MOUSE]	1	0	0		4.4675	8.09	1	1																		#DIV/0!	1	0
Q9D3P1	Trichohyalin-like protein 1 OS=Mus musculus OX=10090 GN=Tchhl1 PE=2 SV=2 - [TCHL1_MOUSE]													1	1	0	0		0	1.72	1	1					#DIV/0!	1	0
Q9D4C5	ELL-associated factor 1 OS=Mus musculus OX=10090 GN=Eaf1 PE=1 SV=2 - [EAF1_MOUSE]													1	1	0	0		3.11507	8.96	1	1					#DIV/0!	1	0
Q9D6M3	Mitochondrial glutamate carrier 1 OS=Mus musculus OX=10090 GN=Slc25a22 PE=1 SV=1 - [GHC1_MOUSE]													1	1	0	0		3.28032	10.22	1	1					#DIV/0!	1	0
Q9D6T1	Tubulin epsilon chain OS=Mus musculus OX=10090 GN=Tube1 PE=1 SV=1 - [TBE_MOUSE]	1	0	0		4.37661	4.42	1	1																		#DIV/0!	1	0
Q9EQW7	Kinesin-like protein KIF13A OS=Mus musculus OX=10090 GN=Kif13a PE=1 SV=1 - [KI13A_MOUSE]	1	0	0		0	0.57	1	1																		#DIV/0!	1	0
Q9ESL0	Succinyl-CoA:3-ketoacid coenzyme A transferase 2B, mitochondrial OS=Mus musculus OX=10090 GN=Oxct2b PE=2 SV=1 - [SCO2B_MOUSE]													1	1	0	0		0	1.54	1	1					#DIV/0!	1	0
Q9ESZ8	General transcription factor II-I OS=Mus musculus OX=10090 GN=Gtf2i PE=1 SV=3 - [GTF2I_MOUSE]													1	1	0	0		1.65794	1.1	1	1					#DIV/0!	1	0
Q9JL61	DNA-binding protein Rfx5 OS=Mus musculus OX=10090 GN=Rfx5 PE=1 SV=2 - [RFX5_MOUSE]													1	1	0	0		0	1.06	1	1					#DIV/0!	1	0
Q9QZQ0	Neuronal PAS domain-containing protein 3 OS=Mus musculus OX=10090 GN=Npas3 PE=1 SV=1 - [NPAS3_MOUSE]													1	1	0	0		0	2.59	1	1					#DIV/0!	1	0
Q9WTJ4	Flt3-interacting zinc finger protein 1 OS=Mus musculus OX=10090 GN=Fiz1 PE=1 SV=1 - [FIZ1_MOUSE]	1	0	0		4.67833	6	1	1																		#DIV/0!	1	0
Q9Z351	Potassium voltage-gated channel subfamily KQT member 2 OS=Mus musculus OX=10090 GN=Kcnq2 PE=1 SV=1 - [KCNQ2_MOUSE]													1	1	0	0		2.6779	1.98	1	1					#DIV/0!	1	0
E9PVX6	Proliferation marker protein Ki-67 OS=Mus musculus OX=10090 GN=Mki67 PE=1 SV=1 - [KI67_MOUSE]													1	1	0	0		2.57859	0.63	1	1					#DIV/0!	1	0
Q7TNG8	Probable D-lactate dehydrogenase, mitochondrial OS=Mus musculus OX=10090 GN=Ldhd PE=1 SV=1 - [LDHD_MOUSE]	1	1.68795e+09	2.19046e+06	770.591	3.39766	1.65	1	2	1.72256	1.65	1	2														770.591	1	1.68795e+09
O08674	Recombining binding protein suppressor of hairless-like protein OS=Mus musculus OX=10090 GN=Rbpjl PE=1 SV=1 - [RBPJL_MOUSE]	1	7.37981e+08	1.84421e+06	400.16	6.34214	3.3	1	2	3.43172	3.3	1	1														400.16	1	7.37981e+08
P11103	Poly [ADP-ribose] polymerase 1 OS=Mus musculus OX=10090 GN=Parp1 PE=1 SV=3 - [PARP1_MOUSE]	2	350285440	1.55722e+06	224.943	2.30152	3.06	1	1	2.50773	1.48	1	1														224.943	1	350285440
O88492	Perilipin-4 OS=Mus musculus OX=10090 GN=Plin4 PE=1 SV=2 - [PLIN4_MOUSE]	2	1.81112e+07	616897	29.3585	3.24043	1.28	1	1	2.73454	1.28	1	1														29.3585	1	1.81112e+07
Q80X50	Ubiquitin-associated protein 2-like OS=Mus musculus OX=10090 GN=Ubap2l PE=1 SV=1 - [UBP2L_MOUSE]	1	0	506290	0					3.08781	1.36	1	1	2	2	5.85666e+06	290844	20.1368	2.13694	1.36	1	1	2.02319	1.36	1	1	10.0684	1	2.92833e+06
P09602	Non-histone chromosomal protein HMG-17 OS=Mus musculus OX=10090 GN=Hmgn2 PE=1 SV=2 - [HMGN2_MOUSE]													2	2	7.40842e+06	1.045e+06	7.08937	0	16.67	1	1	0	15.56	1	1	7.08937	1	7.40842e+06
Q99LC3	NADH dehydrogenase [ubiquinone] 1 alpha subcomplex subunit 10, mitochondrial OS=Mus musculus OX=10090 GN=Ndufa10 PE=1 SV=1 - [NDUAA_MOUSE]													2	2	5.67508e+06	823199	6.89394	5.09897	9.3	2	2	2.31608	3.1	1	1	6.89394	2	5.67508e+06
Q8CC88	von Willebrand factor A domain-containing protein 8 OS=Mus musculus OX=10090 GN=Vwa8 PE=1 SV=2 - [VWA8_MOUSE]													3	3	8821101	1.87092e+06	4.71486	2.37439	0.58	1	1	3.86815	1.42	2	2	4.71486	1	8821101
P51612	DNA repair protein complementing XP-C cells homolog OS=Mus musculus OX=10090 GN=Xpc PE=1 SV=2 - [XPC_MOUSE]	3	1.4529e+06	328592	4.42159	4.74964	2.37	2	2	2.51965	1.18	1	1														4.42159	2	1.4529e+06
Q3UXZ9	Lysine-specific demethylase 5A OS=Mus musculus OX=10090 GN=Kdm5a PE=1 SV=2 - [KDM5A_MOUSE]	2	1.99236e+06	494882	4.02592	0	0.53	1	1	2.00166	0.59	1	1														4.02592	1	1.99236e+06
Q99JR5	Tubulointerstitial nephritis antigen-like OS=Mus musculus OX=10090 GN=Tinagl1 PE=1 SV=1 - [TINAL_MOUSE]													1	1	1.11878e+06	280384	3.99016	2.23333	2.15	1	1	1.85006	2.15	1	1	3.99016	1	1.11878e+06
P25976	Nucleolar transcription factor 1 OS=Mus musculus OX=10090 GN=Ubtf PE=1 SV=1 - [UBF1_MOUSE]	8	2.40442e+07	6.03529e+06	3.98393	13.7931	9.41	5	5	10.3213	6.93	5	5														3.98393	5	2.40442e+07
Q9Z2Q2	Lysine-rich nucleolar protein 1 OS=Mus musculus OX=10090 GN=Knop1 PE=1 SV=2 - [KNOP1_MOUSE]	1	1.00075e+07	6.07293e+06	1.64789	2.85338	2.72	1	1	2.30836	2.72	1	1	2	2	3.56521e+07	6.2325e+06	5.72035	5.60547	5.86	2	2	2.40591	3.14	1	1	3.68412	1.5	2.28298e+07
P09411	Phosphoglycerate kinase 1 OS=Mus musculus OX=10090 GN=Pgk1 PE=1 SV=4 - [PGK1_MOUSE]													5	5	3.7507e+07	1.08071e+07	3.4706	0	1.68	1	1	13.0358	16.07	5	5	3.4706	1	3.7507e+07
P19253	60S ribosomal protein L13a OS=Mus musculus OX=10090 GN=Rpl13a PE=1 SV=4 - [RL13A_MOUSE]	4	1.48617e+07	2.70501e+06	5.49413	6.14676	17.24	4	4	1.62913	5.42	1	1	11	11	1.93074e+08	1.35629e+08	1.42354	17.5229	34.48	10	15	12.909	29.06	7	11	3.45884	7	1.03968e+08
O08553	Dihydropyrimidinase-related protein 2 OS=Mus musculus OX=10090 GN=Dpysl2 PE=1 SV=2 - [DPYL2_MOUSE]	2	1.55631e+06	0		7.28447	6.64	2	2					6	6	2.33118e+07	6.81612e+06	3.4201	11.5457	11.19	5	5	12.5689	11.36	4	4	3.4201	3.5	1.24341e+07
Q9JKV2	Serine/threonine-protein kinase ICK OS=Mus musculus OX=10090 GN=Cilk1 PE=1 SV=2 - [CILK1_MOUSE]	1	1.93275e+07	5.71072e+06	3.38443	1.72642	1.27	1	1	2.26012	1.27	1	1														3.38443	1	1.93275e+07
Q7TQI8	Testis-specific Y-encoded-like protein 2 OS=Mus musculus OX=10090 GN=Tspyl2 PE=1 SV=1 - [TSYL2_MOUSE]	3	4.52598e+06	1.37584e+06	3.28962	4.99779	2.81	2	2	4.68151	3.25	2	2														3.28962	2	4.52598e+06
Q6PDM1	Male-specific lethal 1 homolog OS=Mus musculus OX=10090 GN=Msl1 PE=1 SV=1 - [MSL1_MOUSE]	5	1.25622e+07	3.8294e+06	3.28046	5.05913	5.03	2	2	8.11753	9.42	4	4														3.28046	2	1.25622e+07
P27546	Microtubule-associated protein 4 OS=Mus musculus OX=10090 GN=Map4 PE=1 SV=3 - [MAP4_MOUSE]	2	4.40242e+06	2.73828e+06	1.60773	2.43819	0.98	1	1	4.2033	2.31	2	2	7	7	1.11853e+07	2.26359e+06	4.94139	13.0323	11.02	7	8	5.60921	2.67	2	2	3.27456	4	7.79385e+06
O08580	Steroid hormone receptor ERR1 OS=Mus musculus OX=10090 GN=Esrra PE=1 SV=4 - [ERR1_MOUSE]													1	1	3.28767e+06	1.01544e+06	3.23769	2.0203	2.13	1	1	2.35874	2.13	1	1	3.23769	1	3.28767e+06
Q3V0C1	Zinc finger matrin-type protein 1 OS=Mus musculus OX=10090 GN=Zmat1 PE=1 SV=2 - [ZMAT1_MOUSE]	6	9.77173e+06	9.19986e+06	1.06216	11.6801	8.68	4	4	20.0425	14.99	6	6	3	3	5.6953e+06	1.09307e+06	5.21035	8.53913	6.86	3	4	2.31712	2.52	1	1	3.13626	3.5	7.73351e+06
Q07643	Collagen alpha-2(IX) chain OS=Mus musculus OX=10090 GN=Col9a2 PE=2 SV=1 - [CO9A2_MOUSE]	1	6803730	2.25507e+06	3.01708	3.44387	2.03	1	1	2.46657	2.03	1	1	2	2	2.8451e+07	0		5.01574	3.92	2	2					3.01708	1.5	1.76274e+07
Q05793	Basement membrane-specific heparan sulfate proteoglycan core protein OS=Mus musculus OX=10090 GN=Hspg2 PE=1 SV=1 - [PGBM_MOUSE]	24	1.92724e+07	6.52779e+06	2.95237	56.0705	8.61	21	21	25.1859	5.26	11	11	18	18	3.90616e+07	1.31529e+07	2.96981	40.491	6.07	16	16	6.09686	1.73	4	4	2.96109	18.5	2.9167e+07
Q62095	ATP-dependent RNA helicase DDX3Y OS=Mus musculus OX=10090 GN=Ddx3y PE=1 SV=2 - [DDX3Y_MOUSE]													1	1	5.48894e+06	1.87208e+06	2.932	1.75709	1.52	1	1	2.23266	1.52	1	1	2.932	1	5.48894e+06
Q6NSW3	A-kinase anchor protein SPHKAP OS=Mus musculus OX=10090 GN=Sphkap PE=1 SV=2 - [SPKAP_MOUSE]	2	5.44885e+06	3.05987e+06	1.78075	1.93733	0.53	1	1	1.83404	1.13	2	2	1	1	1.72611e+06	423624	4.07464	2.00173	0.65	1	1	2.03096	0.65	1	1	2.92769	1	3.58748e+06
E9Q5F9	Histone-lysine N-methyltransferase SETD2 OS=Mus musculus OX=10090 GN=Setd2 PE=1 SV=1 - [SETD2_MOUSE]	3	3.49957e+06	1.20627e+06	2.90116	2.27058	0.43	1	1	4.1146	0.83	2	2														2.90116	1	3.49957e+06
Q9CR57	60S ribosomal protein L14 OS=Mus musculus OX=10090 GN=Rpl14 PE=1 SV=3 - [RL14_MOUSE]	3	1.03906e+07	1.04045e+07	0.998662	5.39113	11.52	2	2	2.40493	11.06	2	2	2	2	3.11473e+06	649794	4.79342	1.91712	4.61	1	1	0	2.76	1	1	2.89604	1.5	6.75268e+06
P14148	60S ribosomal protein L7 OS=Mus musculus OX=10090 GN=Rpl7 PE=1 SV=2 - [RL7_MOUSE]													5	5	1.94203e+07	6.7174e+06	2.89104	7.5671	19.26	5	5	4.94777	7.78	2	2	2.89104	5	1.94203e+07
Q9Z2I9	Succinate--CoA ligase [ADP-forming] subunit beta, mitochondrial OS=Mus musculus OX=10090 GN=Sucla2 PE=1 SV=2 - [SUCB1_MOUSE]													3	3	1.99336e+07	6.897e+06	2.89018	0	1.51	1	1	3.94075	5.62	3	3	2.89018	1	1.99336e+07
Q3UYV9	Nuclear cap-binding protein subunit 1 OS=Mus musculus OX=10090 GN=Ncbp1 PE=1 SV=2 - [NCBP1_MOUSE]	2	8.4389e+06	2.93259e+06	2.87763	2.74999	1.52	1	1	5.48556	3.04	2	2														2.87763	1	8.4389e+06
Q9Z2A5	Arginyl-tRNA--protein transferase 1 OS=Mus musculus OX=10090 GN=Ate1 PE=1 SV=2 - [ATE1_MOUSE]	2	6.57541e+06	1.80754e+06	3.63778	5.70308	5.62	2	2	5.43937	5.62	2	2	2	2	4.73212e+06	2.29462e+06	2.06227	5.43425	4.65	2	2	1.76376	2.33	1	1	2.85002	2	5.65377e+06
Q8CHP0	Zinc finger CCCH domain-containing protein 3 OS=Mus musculus OX=10090 GN=Zc3h3 PE=1 SV=1 - [ZC3H3_MOUSE]	1	4.8753e+06	1.71321e+06	2.84571	1.8627	1.16	1	1	1.70229	0.63	1	1														2.84571	1	4.8753e+06
Q60769	Tumor necrosis factor alpha-induced protein 3 OS=Mus musculus OX=10090 GN=Tnfaip3 PE=1 SV=2 - [TNAP3_MOUSE]													2	2	3.68271e+06	1.29611e+06	2.84135	4.04916	2.45	2	2	2.82172	1.55	1	1	2.84135	2	3.68271e+06
P53569	CCAAT/enhancer-binding protein zeta OS=Mus musculus OX=10090 GN=Cebpz PE=1 SV=2 - [CEBPZ_MOUSE]	3	7.54926e+06	2.67638e+06	2.8207	4.21987	2.09	2	2	4.76505	2	2	2														2.8207	2	7.54926e+06
Q9WTU0	Lysine-specific demethylase PHF2 OS=Mus musculus OX=10090 GN=Phf2 PE=1 SV=2 - [PHF2_MOUSE]	2	4.47626e+06	1.60791e+06	2.7839	6.89686	2.46	2	3	3.05932	1.19	1	1														2.7839	2	4.47626e+06
Q02257	Junction plakoglobin OS=Mus musculus OX=10090 GN=Jup PE=1 SV=3 - [PLAK_MOUSE]													1	1	1.18428e+07	4.27402e+06	2.77089	1.91368	0.94	1	1	1.94919	0.94	1	1	2.77089	1	1.18428e+07
Q9JHU4	Cytoplasmic dynein 1 heavy chain 1 OS=Mus musculus OX=10090 GN=Dync1h1 PE=1 SV=2 - [DYHC1_MOUSE]	3	1.57816e+06	2.36982e+06	0.665943	2.18482	0.34	1	1	2.55002	0.62	2	2	16	16	2.29117e+07	4.71653e+06	4.85775	27.9332	4.65	14	14	15.1431	1.94	5	5	2.76185	7.5	1.22449e+07
Q9ERU9	E3 SUMO-protein ligase RanBP2 OS=Mus musculus OX=10090 GN=Ranbp2 PE=1 SV=2 - [RBP2_MOUSE]	5	5.28749e+06	2.14658e+06	2.46322	0	0.39	1	1	8.77471	2	5	5	5	5	1.29405e+07	4.49726e+06	2.87743	9.20711	1.64	4	4	2.88116	1.31	3	3	2.67032	2.5	9.11402e+06
O54774	AP-3 complex subunit delta-1 OS=Mus musculus OX=10090 GN=Ap3d1 PE=1 SV=1 - [AP3D1_MOUSE]	16	1.71218e+07	1.80175e+07	0.950287	31.7743	10.34	8	11	44.8988	17.1	16	17	1	1	1.45057e+07	3.34377e+06	4.33813	1.74232	0.92	1	1	2.06046	0.92	1	1	2.64421	4.5	1.58138e+07
Q8VEM8	Phosphate carrier protein, mitochondrial OS=Mus musculus OX=10090 GN=Slc25a3 PE=1 SV=1 - [MPCP_MOUSE]	3	1.62677e+07	1.11808e+07	1.45497	4.37194	5.6	2	2	3.60511	5.04	2	2	6	6	5.41885e+07	1.42759e+07	3.79579	11.3599	19.05	5	5	13.4894	15.69	4	5	2.62538	3.5	3.52281e+07
Q69Z99	Zinc finger protein 512 OS=Mus musculus OX=10090 GN=Znf512 PE=2 SV=2 - [ZN512_MOUSE]	23	1.10632e+08	7.20144e+07	1.53624	75.9254	46.44	19	26	59.2688	43.59	20	24	6	6	1.80724e+07	4.88309e+06	3.70102	9.51136	7.83	4	4	7.0717	6.05	3	3	2.61863	11.5	6.43521e+07
Q6PDM2	Serine/arginine-rich splicing factor 1 OS=Mus musculus OX=10090 GN=Srsf1 PE=1 SV=3 - [SRSF1_MOUSE]	2	1.12569e+07	4.31143e+06	2.61094	4.80155	8.87	2	2	2.5953	4.84	1	1														2.61094	2	1.12569e+07
P43006	Excitatory amino acid transporter 2 OS=Mus musculus OX=10090 GN=Slc1a2 PE=1 SV=1 - [EAA2_MOUSE]													2	2	3.47029e+06	1.36656e+06	2.53944	2.40913	2.62	1	1	2.40384	1.92	1	1	2.53944	1	3.47029e+06
P11087	Collagen alpha-1(I) chain OS=Mus musculus OX=10090 GN=Col1a1 PE=1 SV=4 - [CO1A1_MOUSE]	10	7.84976e+07	2.79898e+07	2.8045	19.9996	7.64	9	10	5.54275	3.17	2	2	1	1	2.06377e+07	9.18299e+06	2.24738	2.32797	0.62	1	1	1.93677	0.62	1	1	2.52594	5	4.95676e+07
Q6PFD5	Disks large-associated protein 3 OS=Mus musculus OX=10090 GN=Dlgap3 PE=1 SV=1 - [DLGP3_MOUSE]	1	2.81186e+06	968792	2.90244	1.96345	1.84	1	1	3.24637	1.84	1	1	1	1	7.99986e+06	3.83158e+06	2.08788	3.60679	1.84	1	1	2.87065	1.84	1	1	2.49516	1	5.40586e+06
Q9WU42	Nuclear receptor corepressor 2 OS=Mus musculus OX=10090 GN=Ncor2 PE=1 SV=3 - [NCOR2_MOUSE]	2	1.10241e+06	0		4.96885	1.38	2	2					2	2	1.87893e+06	769906	2.44047	3.81433	0.97	2	2	1.96459	0.53	1	1	2.44047	2	1.49067e+06
Q3TEA8	Heterochromatin protein 1-binding protein 3 OS=Mus musculus OX=10090 GN=Hp1bp3 PE=1 SV=1 - [HP1B3_MOUSE]	9	4.08325e+07	1.68875e+07	2.41792	17.5611	17.33	9	10	8.77337	9.57	5	5														2.41792	9	4.08325e+07
Q8CH09	SURP and G-patch domain-containing protein 2 OS=Mus musculus OX=10090 GN=Sugp2 PE=1 SV=2 - [SUGP2_MOUSE]	19	1.66645e+07	2.23479e+07	0.745688	34.1386	16.87	14	14	38.0125	17.15	15	16	21	21	4.83869e+07	1.20777e+07	4.00631	52.4804	25.12	21	23	9.99923	6.94	5	5	2.376	17.5	3.25257e+07
Q9Z2K1	Keratin, type I cytoskeletal 16 OS=Mus musculus OX=10090 GN=Krt16 PE=1 SV=3 - [K1C16_MOUSE]	3	2.76649e+08	8.25947e+07	3.34948	20.3434	14.93	7	9	16.9681	13.43	6	7	2	6	6.75483e+08	4.8454e+08	1.39407	18.3722	11.73	5	8	16.1291	13.01	5	8	2.37177	6	4.76066e+08
P62264	40S ribosomal protein S14 OS=Mus musculus OX=10090 GN=Rps14 PE=1 SV=3 - [RS14_MOUSE]	1	1.15258e+07	6.80839e+06	1.69288	0	7.28	1	1	1.67542	7.28	1	1	1	1	8.34978e+06	2.74259e+06	3.04448	2.08434	8.61	1	1	2.09052	8.61	1	1	2.36868	1	9.9378e+06
Q61292	Laminin subunit beta-2 OS=Mus musculus OX=10090 GN=Lamb2 PE=1 SV=2 - [LAMB2_MOUSE]	3	1.41536e+06	598971	2.36299	6.79267	1.78	3	3	2.56076	0.61	1	1	3	3	9.21422e+06	0		7.23635	2.33	3	3					2.36299	3	5.31479e+06
P62918	60S ribosomal protein L8 OS=Mus musculus OX=10090 GN=Rpl8 PE=1 SV=2 - [RL8_MOUSE]	3	2.88778e+07	1.55088e+07	1.86202	5.66917	10.51	2	2	4.9895	13.23	3	3	10	10	1.27972e+08	4.50321e+07	2.84181	20.7253	40.47	9	10	13.1066	28.02	5	6	2.35191	5.5	7.84251e+07
Q61781	Keratin, type I cytoskeletal 14 OS=Mus musculus OX=10090 GN=Krt14 PE=1 SV=2 - [K1C14_MOUSE]	2	2.76689e+08	8.37331e+07	3.30441	23.3557	17.77	7	9	12.3535	13.02	5	5	2	11	7.05226e+08	5.17125e+08	1.36375	42.1605	23.35	11	16	21.1453	15.7	7	11	2.33408	9	4.90958e+08
P46460	Vesicle-fusing ATPase OS=Mus musculus OX=10090 GN=Nsf PE=1 SV=2 - [NSF_MOUSE]													1	1	2.95898e+07	1.28402e+07	2.30447	2.7845	2.15	1	1	2.47431	2.15	1	1	2.30447	1	2.95898e+07
P62806	Histone H4 OS=Mus musculus OX=10090 GN=H4c1 PE=1 SV=2 - [H4_MOUSE]	3	3.7301e+07	8.43524e+06	4.42205	2.12611	17.48	2	2	4.04581	30.1	3	3	4	4	4.23525e+07	2.77942e+08	0.152379	4.02109	30.1	3	3	14.2539	31.07	4	8	2.28721	2.5	3.98268e+07
Q3UHB8	Coiled-coil domain-containing protein 177 OS=Mus musculus OX=10090 GN=Ccdc177 PE=1 SV=1 - [CC177_MOUSE]	2	3.6112e+06	1.5958e+06	2.26294	3.56129	2.27	2	2	1.78988	1.13	1	1														2.26294	2	3.6112e+06
Q9Z2E2	Methyl-CpG-binding domain protein 1 OS=Mus musculus OX=10090 GN=Mbd1 PE=1 SV=2 - [MBD1_MOUSE]	3	4.96357e+06	2212879	2.24304	7.51776	6.29	3	3	5.76294	4.09	2	2														2.24304	3	4.96357e+06
Q6IQX8	Zinc finger protein 219 OS=Mus musculus OX=10090 GN=Znf219 PE=1 SV=1 - [ZN219_MOUSE]	6	1.06741e+07	4.7773e+06	2.23433	15.3786	15.7	6	6	5.4229	3.72	2	2														2.23433	6	1.06741e+07
Q8K0U4	Heat shock 70 kDa protein 12A OS=Mus musculus OX=10090 GN=Hspa12a PE=1 SV=1 - [HS12A_MOUSE]	2	4.09918e+06	0		4.76951	3.7	2	2					4	4	1.1535e+07	5.17154e+06	2.23048	7.88617	7.7	4	4	0	1.48	1	1	2.23048	3	7.81709e+06
Q9QYR6	Microtubule-associated protein 1A OS=Mus musculus OX=10090 GN=Map1a PE=1 SV=2 - [MAP1A_MOUSE]	2	2.33298e+06	1.97212e+06	1.18298	5.21095	0.94	2	2	5.15545	0.94	2	2	4	4	9.24165e+06	2.88992e+06	3.19789	3.76701	1.22	3	3	4.24479	0.83	2	2	2.19044	2.5	5.78732e+06
Q80V94	AP-4 complex subunit epsilon-1 OS=Mus musculus OX=10090 GN=Ap4e1 PE=1 SV=3 - [AP4E1_MOUSE]													1	1	6.0894e+06	2.80784e+06	2.16872	0	0.62	1	1	0	0.62	1	1	2.16872	1	6.0894e+06
Q9DBE9	pre-rRNA 2'-O-ribose RNA methyltransferase FTSJ3 OS=Mus musculus OX=10090 GN=Ftsj3 PE=1 SV=1 - [SPB1_MOUSE]													3	3	7.61828e+06	3.53678e+06	2.15401	5.82958	5.01	2	2	5.05626	4.42	2	2	2.15401	2	7.61828e+06
Q62108	Disks large homolog 4 OS=Mus musculus OX=10090 GN=Dlg4 PE=1 SV=1 - [DLG4_MOUSE]	6	2.25835e+07	8.54694e+06	2.64229	19.6316	15.06	6	6	11.3729	9.81	4	4	14	14	1.19064e+08	7.22662e+07	1.64757	43.4116	26.93	13	15	37.2954	21.82	9	11	2.14493	9.5	7.08236e+07
Q80XI3	Eukaryotic translation initiation factor 4 gamma 3 OS=Mus musculus OX=10090 GN=Eif4g3 PE=1 SV=2 - [IF4G3_MOUSE]	1	1.64781e+06	988309	1.6673	2.06974	0.82	1	1	0	0.82	1	1	2	2	5.57763e+06	2.14763e+06	2.59712	2.23854	0.82	1	1	2.10741	1.33	2	2	2.13221	1	3.61272e+06
Q3UHD3	Microtubule-associated tumor suppressor candidate 2 homolog OS=Mus musculus OX=10090 GN=Mtus2 PE=1 SV=1 - [MTUS2_MOUSE]	3	2.11916e+06	0		4.7474	2.37	3	3					4	4	5.79391e+06	2.79741e+06	2.07117	6.89351	3.1	3	3	2.59629	0.59	1	1	2.07117	3	3.95654e+06
Q61414	Keratin, type I cytoskeletal 15 OS=Mus musculus OX=10090 GN=Krt15 PE=1 SV=2 - [K1C15_MOUSE]	2	2.76649e+08	1.16003e+08	2.38485	13.2406	9.96	5	6	4.9464	4.42	2	2	2	8	1.07285e+09	611223930	1.75525	22.3515	9.96	6	10	23.9255	9.96	8	13	2.07005	5.5	6.74749e+08
Q6P7F1	MAGUK p55 subfamily member 4 OS=Mus musculus OX=10090 GN=Mpp4 PE=1 SV=1 - [MPP4_MOUSE]	4	7.20278e+06	2.49579e+06	2.88597	7.88343	6.61	4	4	2.70352	1.73	1	1	12	12	4.80376e+07	3.843e+07	1.25	24.0838	21.26	10	11	30.6414	17.95	9	12	2.06799	7	2.76202e+07
Q80WV7	Serine/arginine repetitive matrix protein 3 OS=Mus musculus OX=10090 GN=Srrm3 PE=2 SV=1 - [SRRM3_MOUSE]	5	1.1503e+07	5.56605e+06	2.06664	6.796	6.17	3	7	10.3088	7.56	3	7														2.06664	3	1.1503e+07
Q6PAQ4	RNA exonuclease 4 OS=Mus musculus OX=10090 GN=Rexo4 PE=2 SV=2 - [REXO4_MOUSE]	3	6.81143e+06	3.39477e+06	2.00645	11.9293	12.27	3	4	6.05913	8.8	2	2														2.00645	3	6.81143e+06
Q0P678	Zinc finger CCCH domain-containing protein 18 OS=Mus musculus OX=10090 GN=Zc3h18 PE=1 SV=1 - [ZCH18_MOUSE]	5	8.6588e+06	4.31988e+06	2.00441	5.56911	4.22	2	2	9.58334	6.33	4	4														2.00441	2	8.6588e+06
Q9D8E6	60S ribosomal protein L4 OS=Mus musculus OX=10090 GN=Rpl4 PE=1 SV=3 - [RL4_MOUSE]	14	4.6256e+07	3.40065e+07	1.36021	27.93	34.13	12	12	24.8883	28.88	10	10	12	12	1.99078e+08	7.52399e+07	2.64591	33.6796	33.41	11	15	16.3204	21	7	7	2.00306	11.5	1.22667e+08
Q9DCJ7	Aurora kinase A-interacting protein OS=Mus musculus OX=10090 GN=Aurkaip1 PE=2 SV=2 - [AKIP_MOUSE]	1	1.01512e+07	3.60387e+06	2.81674	1.79207	5	1	1	1.71174	5	1	1	1	1	1.73624e+08	148738325	1.16731	2.74521	5	1	1	2.42404	5	1	1	1.99203	1	9.18875e+07
Q69ZA1	Cyclin-dependent kinase 13 OS=Mus musculus OX=10090 GN=Cdk13 PE=1 SV=3 - [CDK13_MOUSE]	8	1.89555e+07	9.69432e+06	1.95532	17.7376	6.35	7	7	20.9261	8.21	7	7														1.95532	7	1.89555e+07
Q6DFW4	Nucleolar protein 58 OS=Mus musculus OX=10090 GN=Nop58 PE=1 SV=1 - [NOP58_MOUSE]	12	3.821e+07	1.96021e+07	1.94929	37.0957	32.65	11	14	14.3358	17.54	6	6														1.94929	11	3.821e+07
Q8K224	RNA cytidine acetyltransferase OS=Mus musculus OX=10090 GN=Nat10 PE=1 SV=1 - [NAT10_MOUSE]	6	6.31664e+06	3.25739e+06	1.93917	15.1584	6.35	5	6	5.81042	3.13	2	2														1.93917	5	6.31664e+06
Q61554	Fibrillin-1 OS=Mus musculus OX=10090 GN=Fbn1 PE=1 SV=2 - [FBN1_MOUSE]	20	2.05973e+07	7.72141e+06	2.66755	44.5844	8.42	19	19	15.2456	2.78	7	7	12	12	2.61194e+08	2.19873e+08	1.18793	18.6065	3.62	11	11	1.8216	0.94	3	3	1.92774	15	1.40896e+08
O35927	Catenin delta-2 OS=Mus musculus OX=10090 GN=Ctnnd2 PE=1 SV=1 - [CTND2_MOUSE]	1	3.43052e+06	2.96085e+06	1.15863	1.74119	0.8	1	1	3.56213	1.92	2	2	2	4	6.92545e+06	2.58485e+06	2.67925	2.35137	2.73	3	3	1.61728	1.28	2	2	1.91894	2	5.17798e+06
Q8R361	Rab11 family-interacting protein 5 OS=Mus musculus OX=10090 GN=Rab11fip5 PE=1 SV=2 - [RFIP5_MOUSE]	3	3.92586e+06	2.05912e+06	1.90657	8.46629	8.06	3	3	2.19991	1.55	1	1														1.90657	3	3.92586e+06
Q8C6B9	Active regulator of SIRT1 OS=Mus musculus OX=10090 GN=Rps19bp1 PE=1 SV=1 - [AROS_MOUSE]	7	1.5858e+07	9.41058e+06	1.68513	6.36267	26.57	3	3	13.4861	46.15	6	6	2	2	3.9365e+06	1.85535e+06	2.12171	2.00291	12.59	1	1	4.19938	22.38	2	2	1.90342	2	9.89725e+06
A2APV2	Formin-like protein 2 OS=Mus musculus OX=10090 GN=Fmnl2 PE=1 SV=2 - [FMNL2_MOUSE]	4	3.25531e+06	1.71212e+06	1.90133	6.42478	3.59	3	3	4.52088	2.3	2	2														1.90133	3	3.25531e+06
Q99K48	Non-POU domain-containing octamer-binding protein OS=Mus musculus OX=10090 GN=Nono PE=1 SV=3 - [NONO_MOUSE]													1	1	4.17269e+06	2.20051e+06	1.89624	2.61896	2.96	1	1	2.27219	2.96	1	1	1.89624	1	4.17269e+06
Q9Z273	Tubby-related protein 1 OS=Mus musculus OX=10090 GN=Tulp1 PE=1 SV=1 - [TULP1_MOUSE]	8	1.08217e+07	5.70704e+06	1.89621	20.1279	18.23	8	10	6.2404	7.92	3	3														1.89621	8	1.08217e+07
Q9R0L7	A-kinase anchor protein 8-like OS=Mus musculus OX=10090 GN=Akap8l PE=1 SV=1 - [AKP8L_MOUSE]	1	0	4.67343e+06	0					2.69415	2.02	1	1	2	2	1.27163e+07	3.35678e+06	3.78824	5.14666	3.74	2	2	2.0351	2.02	1	1	1.89412	2	6.35813e+06
Q9JIS5	Synaptic vesicle glycoprotein 2A OS=Mus musculus OX=10090 GN=Sv2a PE=1 SV=1 - [SV2A_MOUSE]	2	5.02561e+06	3.43753e+06	1.46198	4.10588	3.37	2	2	5.12038	3.37	2	2	5	5	1.20009e+07	5.20368e+06	2.30624	9.88323	8.49	4	4	6.10104	4.04	3	3	1.88411	3	8.51327e+06
O88665	Bromodomain-containing protein 7 OS=Mus musculus OX=10090 GN=Brd7 PE=1 SV=1 - [BRD7_MOUSE]	11	2.64287e+07	2.45928e+07	1.07465	15.4545	13.98	6	6	19.1029	21.81	8	8	5	5	1.00713e+07	3.75026e+06	2.68551	10.6664	9.98	4	4	5.60334	3.38	2	2	1.88008	5	1.825e+07
Q811P8	Rho GTPase-activating protein 32 OS=Mus musculus OX=10090 GN=Arhgap32 PE=1 SV=2 - [RHG32_MOUSE]	7	5.36878e+06	2.25146e+06	2.38458	17.3445	4.64	6	6	1.90057	1.29	2	2	7	7	1.51091e+07	1.10162e+07	1.37153	11.8079	3.97	7	7	4.29598	1.05	1	1	1.87806	6.5	1.0239e+07
Q9D823	60S ribosomal protein L37 OS=Mus musculus OX=10090 GN=Rpl37 PE=3 SV=3 - [RL37_MOUSE]	2	5.54868e+07	1.97666e+07	2.80709	1.73912	14.43	2	3	1.94786	8.25	1	2	2	2	3.47262e+08	3.83966e+08	0.904408	1.91018	7.22	2	2	1.91723	7.22	2	2	1.85575	2	2.01374e+08
Q8VDD9	PH-interacting protein OS=Mus musculus OX=10090 GN=Phip PE=1 SV=2 - [PHIP_MOUSE]	17	1.1342e+07	2.13205e+07	0.531978	20.5281	6.97	8	8	37.8644	11.15	16	16	4	4	1.99938e+06	631691	3.16513	2.11437	1.1	2	2	5.47981	1.54	2	2	1.84855	5	6.6707e+06
P28481	Collagen alpha-1(II) chain OS=Mus musculus OX=10090 GN=Col2a1 PE=1 SV=2 - [CO2A1_MOUSE]	6	9.082e+07	4.50217e+07	2.01725	26.33	5.85	6	10	25.8651	5.85	6	9	4	4	9.90862e+07	5.93054e+07	1.67078	13.3575	2.15	3	4	8.76104	2.76	3	4	1.84402	4.5	9.49531e+07
Q8BSQ9	Protein polybromo-1 OS=Mus musculus OX=10090 GN=Pbrm1 PE=1 SV=4 - [PB1_MOUSE]	11	7.30454e+06	3.96203e+06	1.84364	14.9547	4.77	5	5	11.7088	6.55	8	8														1.84364	5	7.30454e+06
P11983	T-complex protein 1 subunit alpha OS=Mus musculus OX=10090 GN=Tcp1 PE=1 SV=3 - [TCPA_MOUSE]	7	8.02519e+06	3.93771e+06	2.03803	16.2366	12.95	5	7	6.94378	6.29	3	3	10	10	4.65874e+07	2.8268e+07	1.64806	26.2669	24.46	9	10	21.834	20.14	7	8	1.84305	7	2.73063e+07
O54781	SRSF protein kinase 2 OS=Mus musculus OX=10090 GN=Srpk2 PE=1 SV=2 - [SRPK2_MOUSE]	4	6.87826e+06	3.76754e+06	1.82566	4.94715	3.08	2	2	4.41552	6.31	3	3														1.82566	2	6.87826e+06
Q3UHL1	CaM kinase-like vesicle-associated protein OS=Mus musculus OX=10090 GN=Camkv PE=1 SV=2 - [CAMKV_MOUSE]	5	1.84298e+07	7.68822e+06	2.39714	6.57473	6.45	2	2	14.5925	18.16	5	5	3	3	2.74871e+07	2.19561e+07	1.25191	8.99323	10.55	3	3	6.39555	6.45	2	2	1.82453	2.5	2.29585e+07
Q9Z2D6	Methyl-CpG-binding protein 2 OS=Mus musculus OX=10090 GN=Mecp2 PE=1 SV=1 - [MECP2_MOUSE]	15	6.14999e+07	3.43043e+07	1.79278	31.9209	38.02	15	17	21.7675	21.28	7	8	1	1	2.55795e+06	0		2.73197	2.89	1	1	2.17933	2.89	1	1	1.79278	8	3.20289e+07
Q62277	Synaptophysin OS=Mus musculus OX=10090 GN=Syp PE=1 SV=2 - [SYPH_MOUSE]													2	2	2.35129e+07	1.31256e+07	1.79137	5.09961	6.69	2	2	3.23371	2.55	1	2	1.79137	2	2.35129e+07
O35691	Pinin OS=Mus musculus OX=10090 GN=Pnn PE=1 SV=4 - [PININ_MOUSE]	8	7.05166e+06	1.09882e+07	0.64175	9.40648	5.38	3	4	15.491	13.66	7	7	2	2	1.12825e+07	3.85191e+06	2.92905	4.11229	2.48	2	2	1.64413	0.97	1	1	1.7854	2.5	9.16706e+06
Q9QWL7	Keratin, type I cytoskeletal 17 OS=Mus musculus OX=10090 GN=Krt17 PE=1 SV=3 - [K1C17_MOUSE]													1	10	8.91509e+08	4.99815e+08	1.78368	28.631	19.63	10	12	21.61	17.09	9	11	1.78368	10	8.91509e+08
Q9D883	Splicing factor U2AF 35 kDa subunit OS=Mus musculus OX=10090 GN=U2af1 PE=1 SV=4 - [U2AF1_MOUSE]	6	1.68867e+07	6.26825e+07	0.2694	9.50836	21.34	3	3	16.849	35.98	6	6	2	2	2.87158e+07	8.79197e+06	3.26614	4.32179	7.53	1	1	3.10787	13.39	2	2	1.76777	2	2.28012e+07
Q8R0F5	RNA-binding motif protein, X-linked 2 OS=Mus musculus OX=10090 GN=Rbmx2 PE=1 SV=1 - [RBMX2_MOUSE]	1	8.59174e+06	4.89494e+06	1.75523	2.49257	3.99	1	1	2.71186	3.99	1	1														1.75523	1	8.59174e+06
Q8BX70	Vacuolar protein sorting-associated protein 13C OS=Mus musculus OX=10090 GN=Vps13c PE=1 SV=2 - [VP13C_MOUSE]	1	5.03737e+06	3842466	1.31097	2.77839	0.48	1	1	2.68856	0.48	1	1	1	1	5.79659e+06	2.63953e+06	2.19607	3.55362	0.48	1	1	3.25536	0.48	1	1	1.75352	1	5.41698e+06
Q3UL36	Arginine and glutamate-rich protein 1 OS=Mus musculus OX=10090 GN=Arglu1 PE=1 SV=2 - [ARGL1_MOUSE]	5	3.9364e+07	2.26023e+07	1.74159	10.9677	13.28	5	5	0	2.95	1	1														1.74159	5	3.9364e+07
Q91YK2	Ribosomal RNA processing protein 1 homolog B OS=Mus musculus OX=10090 GN=Rrp1b PE=1 SV=2 - [RRP1B_MOUSE]	39	1.95078e+08	1.47517e+08	1.32241	115.071	50.69	34	46	100.8	50.41	31	43	9	9	3.15718e+07	1.46412e+07	2.15636	16.5599	15.88	8	9	6.69964	8.98	6	6	1.73939	21	1.13325e+08
Q922P9	Putative oxidoreductase GLYR1 OS=Mus musculus OX=10090 GN=Glyr1 PE=1 SV=1 - [GLYR1_MOUSE]	12	4.17551e+07	2.40603e+07	1.73544	36.3164	30.77	12	13	15.7275	18.13	6	6	1	1	0	0		2.89475	7.88	1	2					1.73544	6.5	2.08776e+07
A2AJI0	MAP7 domain-containing protein 1 OS=Mus musculus OX=10090 GN=Map7d1 PE=1 SV=1 - [MA7D1_MOUSE]	2	888739	515325	1.72462	2.46941	1.54	1	1	4.4862	2.72	2	2														1.72462	1	888739
P25444	40S ribosomal protein S2 OS=Mus musculus OX=10090 GN=Rps2 PE=1 SV=3 - [RS2_MOUSE]	11	8.3301e+07	4.42541e+07	1.88233	23.9401	35.84	11	11	14.6223	25.6	7	8	8	8	76136915	4.96918e+07	1.53218	17.1151	26.62	8	8	9.82388	16.72	5	5	1.70726	9.5	7.9719e+07
Q9JJI8	60S ribosomal protein L38 OS=Mus musculus OX=10090 GN=Rpl38 PE=1 SV=3 - [RL38_MOUSE]	3	2.56979e+07	2.19213e+07	1.17228	8.23942	35.71	3	3	6.94441	35.71	3	3	3	3	5.16521e+07	2.30575e+07	2.24015	7.73024	35.71	3	3	11.6673	35.71	3	4	1.70621	3	3.8675e+07
Q8VI84	Nucleolar complex protein 3 homolog OS=Mus musculus OX=10090 GN=Noc3l PE=2 SV=2 - [NOC3L_MOUSE]	2	1.09409e+07	6.41286e+06	1.70609	5.27185	3.59	1	1	6.79044	5.45	2	2														1.70609	1	1.09409e+07
Q9EPU0	Regulator of nonsense transcripts 1 OS=Mus musculus OX=10090 GN=Upf1 PE=1 SV=2 - [RENT1_MOUSE]	4	1.85534e+06	3.08449e+06	0.601506	2.12042	0.89	1	1	10.2893	4.89	4	4	5	5	16476102	5.8645e+06	2.80947	9.28125	5.69	4	4	4.42156	3.29	3	3	1.70549	2.5	9.16572e+06
Q8VED5	Keratin, type II cytoskeletal 79 OS=Mus musculus OX=10090 GN=Krt79 PE=1 SV=2 - [K2C79_MOUSE]	1	3.284e+08	2.0588e+08	1.59511	13.6533	5.46	4	6	6.9916	5.46	4	6	1	7	1.02392e+09	5.65106e+08	1.81192	13.4233	5.84	5	9	19.6294	5.84	6	11	1.70351	4.5	6.76162e+08
Q04750	DNA topoisomerase 1 OS=Mus musculus OX=10090 GN=Top1 PE=1 SV=2 - [TOP1_MOUSE]	18	3.96239e+07	2.3265e+07	1.70315	28.9646	19.3	14	14	21.0919	14.34	11	11														1.70315	14	3.96239e+07
Q8C119	Protein NDNF OS=Mus musculus OX=10090 GN=Ndnf PE=1 SV=2 - [NDNF_MOUSE]													1	1	2.1873e+07	1.29182e+07	1.69318	2.46815	1.94	1	1	3.26	1.94	1	1	1.69318	1	2.1873e+07
Q6DIC0	Probable global transcription activator SNF2L2 OS=Mus musculus OX=10090 GN=Smarca2 PE=1 SV=1 - [SMCA2_MOUSE]	3	8.23962e+06	4.88197e+06	1.68777	13.5615	4.25	6	6	9.81957	3.17	4	4														1.68777	6	8.23962e+06
P62717	60S ribosomal protein L18a OS=Mus musculus OX=10090 GN=Rpl18a PE=1 SV=1 - [RL18A_MOUSE]	2	9.70481e+06	1.10108e+07	0.881389	5.51979	15.34	2	2	4.62614	15.34	2	2	7	7	7.26606e+07	2.91569e+07	2.49206	19.6487	35.23	7	9	9.50522	35.23	6	6	1.68672	4.5	4.11827e+07
Q8R2M2	Deoxynucleotidyltransferase terminal-interacting protein 2 OS=Mus musculus OX=10090 GN=Dnttip2 PE=1 SV=1 - [TDIF2_MOUSE]	2	9.14788e+06	5.43008e+06	1.68467	3.23027	4.22	1	1	3.30158	2.37	1	1														1.68467	1	9.14788e+06
P60335	Poly(rC)-binding protein 1 OS=Mus musculus OX=10090 GN=Pcbp1 PE=1 SV=1 - [PCBP1_MOUSE]	4	1.45742e+07	1.29307e+07	1.1271	8.47787	13.2	3	3	10.9069	16.29	4	4	5	5	5.86961e+07	2.62366e+07	2.23718	14.9607	24.16	5	5	6.11568	8.71	2	2	1.68214	4	3.66351e+07
P61979	Heterogeneous nuclear ribonucleoprotein K OS=Mus musculus OX=10090 GN=Hnrnpk PE=1 SV=1 - [HNRPK_MOUSE]	5	5.65546e+06	3.91911e+06	1.44305	7.15082	12.96	4	4	11.2561	14.69	5	5	3	3	2.10701e+07	1.09984e+07	1.91575	2.12951	2.59	1	1	3.12057	6.91	2	2	1.6794	2.5	1.33628e+07
P70168	Importin subunit beta-1 OS=Mus musculus OX=10090 GN=Kpnb1 PE=1 SV=2 - [IMB1_MOUSE]													1	1	3.45279e+06	2.06417e+06	1.67273	0	1.03	1	1	1.8425	1.03	1	1	1.67273	1	3.45279e+06
Q8CI11	Guanine nucleotide-binding protein-like 3 OS=Mus musculus OX=10090 GN=Gnl3 PE=1 SV=2 - [GNL3_MOUSE]	23	7.69201e+07	5.85401e+07	1.31397	54.0792	45.54	19	21	45.0047	37.92	16	20	31	31	3.99727e+08	1.97451e+08	2.02444	96.2965	47.4	24	35	106.291	50.93	26	41	1.6692	21.5	2.38324e+08
P61358	60S ribosomal protein L27 OS=Mus musculus OX=10090 GN=Rpl27 PE=1 SV=2 - [RL27_MOUSE]	2	3.13796e+07	2.13378e+07	1.47061	2.2853	13.97	2	2	1.61152	5.88	1	1	6	6	3.31766e+08	1.77991e+08	1.86395	15.5135	50.74	6	9	10.2919	20.59	3	5	1.66728	4	1.81573e+08
O35286	Pre-mRNA-splicing factor ATP-dependent RNA helicase DHX15 OS=Mus musculus OX=10090 GN=Dhx15 PE=1 SV=2 - [DHX15_MOUSE]	21	7.19693e+07	4.57056e+07	1.57463	47.163	25.28	18	21	41.166	23.14	16	19	16	16	8.00453e+07	4.56043e+07	1.75521	40.8017	22.52	15	17	26.8428	16.86	12	13	1.66492	16.5	7.60073e+07
O35600	Retinal-specific phospholipid-transporting ATPase ABCA4 OS=Mus musculus OX=10090 GN=Abca4 PE=2 SV=1 - [ABCA4_MOUSE]	5	3.48179e+06	0		11.945	3.25	5	5					2	2	5.44267e+06	3.27568e+06	1.66154	4.54972	0.91	2	2	2.30998	0.52	1	1	1.66154	3.5	4.46223e+06
P50149	Guanine nucleotide-binding protein G(t) subunit alpha-2 OS=Mus musculus OX=10090 GN=Gnat2 PE=2 SV=2 - [GNAT2_MOUSE]													1	5	1.09261e+08	6.58233e+07	1.65992	5.44942	7.63	2	2	10.1009	15.25	4	4	1.65992	2	1.09261e+08
Q99M73	Keratin, type II cuticular Hb4 OS=Mus musculus OX=10090 GN=Krt84 PE=2 SV=2 - [KRT84_MOUSE]	1	1.18142e+08	7.11966e+07	1.65937	5.49709	2.65	2	3	4.4412	3.15	2	3														1.65937	2	1.18142e+08
O88848	ADP-ribosylation factor-like protein 6 OS=Mus musculus OX=10090 GN=Arl6 PE=1 SV=1 - [ARL6_MOUSE]													1	1	1.31892e+07	7.94838e+06	1.65936	2.88722	11.29	1	1	2.74941	11.29	1	1	1.65936	1	1.31892e+07
P02535	Keratin, type I cytoskeletal 10 OS=Mus musculus OX=10090 GN=Krt10 PE=1 SV=3 - [K1C10_MOUSE]	4	4.4118e+08	2.28585e+08	1.93005	27.9121	10.88	6	11	13.4463	7.54	4	5	5	7	1.53486e+09	1.12028e+09	1.37007	46.2055	12.28	7	18	37.3687	12.28	7	17	1.65006	6.5	9.88018e+08
Q5DU25	IQ motif and SEC7 domain-containing protein 2 OS=Mus musculus OX=10090 GN=Iqsec2 PE=1 SV=3 - [IQEC2_MOUSE]	3	2.939e+07	1.28759e+07	2.28255	2.74558	0.68	1	1	12.9947	4.13	5	5	5	7	3.49543e+07	3.44072e+07	1.0159	15.4266	6.56	6	6	13.7096	2.84	4	6	1.64923	3.5	3.21721e+07
Q9CXS4	Centromere protein V OS=Mus musculus OX=10090 GN=Cenpv PE=1 SV=2 - [CENPV_MOUSE]	2	3.25609e+06	1.89179e+06	1.72117	1.92036	5.16	1	1	5.36729	16.27	2	2	1	1	4.8493e+06	3.07591e+06	1.57654	2.15833	5.16	1	1	2.83338	5.16	1	1	1.64886	1	4.0527e+06
Q9Z277	Tyrosine-protein kinase BAZ1B OS=Mus musculus OX=10090 GN=Baz1b PE=1 SV=2 - [BAZ1B_MOUSE]	61	1.20348e+08	1.06055e+08	1.13477	134.023	34.69	48	56	126.746	34.35	50	60	3	3	9203947	4.29777e+06	2.14157	2.43019	1.01	1	1	3.87224	0.95	2	2	1.63817	24.5	6.47759e+07
Q9CRB2	H/ACA ribonucleoprotein complex subunit 2 OS=Mus musculus OX=10090 GN=Nhp2 PE=1 SV=1 - [NHP2_MOUSE]	2	6.33957e+06	3.89453e+06	1.62782	6.50978	21.57	2	2	5.92825	21.57	2	2														1.62782	2	6.33957e+06
A2BE28	Ribosomal biogenesis protein LAS1L OS=Mus musculus OX=10090 GN=Las1l PE=1 SV=1 - [LAS1L_MOUSE]	9	8.18602e+06	5.02901e+06	1.62776	18.2949	11.21	7	7	17.5063	12.11	7	7														1.62776	7	8.18602e+06
Q9D6Z1	Nucleolar protein 56 OS=Mus musculus OX=10090 GN=Nop56 PE=1 SV=2 - [NOP56_MOUSE]	22	5.53839e+07	3.41757e+07	1.62056	63.507	40.69	19	23	40.4949	35	15	16														1.62056	19	5.53839e+07
Q9QXK3	Coatomer subunit gamma-2 OS=Mus musculus OX=10090 GN=Copg2 PE=1 SV=1 - [COPG2_MOUSE]													1	1	2.87015e+06	1.7714e+06	1.62027	2.11592	1.38	1	1	2.36772	1.38	1	1	1.62027	1	2.87015e+06
Q922U2	Keratin, type II cytoskeletal 5 OS=Mus musculus OX=10090 GN=Krt5 PE=1 SV=1 - [K2C5_MOUSE]	4	5.65949e+08	3.32004e+08	1.70465	39.708	14.31	9	19	18.5933	8.62	6	11	9	20	1.29366e+09	8.44301e+08	1.53222	56.4065	17.24	15	26	59.6813	19.31	16	27	1.61844	12	9.29804e+08
Q3TTY5	Keratin, type II cytoskeletal 2 epidermal OS=Mus musculus OX=10090 GN=Krt2 PE=1 SV=1 - [K22E_MOUSE]	5	2.6966e+08	1.56303e+08	1.72523	13.7444	7.07	6	8	8.76259	6.79	6	8	7	13	8.27079e+08	5.4982e+08	1.50427	18.5806	10.04	10	12	27.9658	8.77	10	16	1.61475	8	5.48369e+08
Q62318	Transcription intermediary factor 1-beta OS=Mus musculus OX=10090 GN=Trim28 PE=1 SV=3 - [TIF1B_MOUSE]	6	1.05636e+07	6.86574e+06	1.53859	11.7687	7.55	5	5	11.0833	8.75	4	4	3	3	9.35655e+06	5.57125e+06	1.67944	6.91932	4.92	3	3	5.02658	3	2	2	1.60901	4	9.96006e+06
Q60737	Casein kinase II subunit alpha OS=Mus musculus OX=10090 GN=Csnk2a1 PE=1 SV=2 - [CSK21_MOUSE]	2	5.51694e+06	3.44003e+06	1.60375	2.28308	6.39	2	2	0	1.79	1	1														1.60375	2	5.51694e+06
P04104	Keratin, type II cytoskeletal 1 OS=Mus musculus OX=10090 GN=Krt1 PE=1 SV=4 - [K2C1_MOUSE]	2	6.83921e+08	4.25105e+08	1.60883	28.1885	6.12	5	11	15.472	6.12	5	8	3	7	1.89068e+09	1.18704e+09	1.59277	29.5831	6.44	6	14	35.5779	6.28	6	16	1.6008	5.5	1.2873e+09
Q6NXH9	Keratin, type II cytoskeletal 73 OS=Mus musculus OX=10090 GN=Krt73 PE=1 SV=1 - [K2C73_MOUSE]	1	5.34107e+08	3.35232e+08	1.59324	18.7914	5.57	3	8	10.8228	5.57	3	6														1.59324	3	5.34107e+08
Q8VCC9	Spondin-1 OS=Mus musculus OX=10090 GN=Spon1 PE=1 SV=1 - [SPON1_MOUSE]	8	1.24457e+07	7.89308e+06	1.57679	13.9087	11.9	7	7	10.4998	7.43	5	5														1.57679	7	1.24457e+07
Q91VR2	ATP synthase subunit gamma, mitochondrial OS=Mus musculus OX=10090 GN=Atp5f1c PE=1 SV=1 - [ATPG_MOUSE]	5	1.42251e+07	8.2819e+06	1.71761	10.234	16.11	4	4	9.56903	15.77	4	4	10	10	4.87555e+07	3.40714e+07	1.43098	13.6247	22.48	7	7	24.4555	28.19	8	9	1.5743	5.5	3.14903e+07
P56546	C-terminal-binding protein 2 OS=Mus musculus OX=10090 GN=Ctbp2 PE=1 SV=2 - [CTBP2_MOUSE]	14	1.66026e+08	1.2139e+08	1.3677	39.8359	34.38	13	17	28.5222	27.42	10	12	8	8	2.47293e+08	1.39622e+08	1.77116	24.7391	21.35	8	10	15.7632	13.48	5	6	1.56943	10.5	2.06659e+08
Q8BGS1	Band 4.1-like protein 5 OS=Mus musculus OX=10090 GN=Epb41l5 PE=1 SV=1 - [E41L5_MOUSE]	22	1.357e+08	1.23823e+08	1.09592	72.6675	40.9	20	30	68.0298	39.67	18	26	19	19	1.31973e+08	6.47919e+07	2.03688	53.2698	34.75	17	21	28.9987	21.89	10	11	1.5664	18.5	1.33837e+08
Q8BMS1	Trifunctional enzyme subunit alpha, mitochondrial OS=Mus musculus OX=10090 GN=Hadha PE=1 SV=1 - [ECHA_MOUSE]	5	2.47621e+06	2.43095e+06	1.01862	3.26674	2.75	1	1	13.6492	10.88	5	5	13	13	5.64794e+07	2.67745e+07	2.10945	40.3741	23.85	13	16	48.7577	22.67	12	17	1.56403	7	2.94778e+07
Q8K2J0	1-phosphatidylinositol 4,5-bisphosphate phosphodiesterase delta-3 OS=Mus musculus OX=10090 GN=Plcd3 PE=1 SV=2 - [PLCD3_MOUSE]	9	8.68324e+06	5.55838e+06	1.56219	22.862	16.82	8	8	10.0795	6.88	3	3	2	2	2.80586e+06	0		5.65667	3.57	2	2					1.56219	5	5.74455e+06
G5E8B9	Zinc finger and BTB domain-containing protein 11 OS=Mus musculus OX=10090 GN=Zbtb11 PE=2 SV=1 - [ZBT11_MOUSE]	15	2.44816e+07	2.28272e+07	1.07248	28.2033	15.24	12	12	25.6851	11.05	10	10	1	1	8.44113e+06	4.15912e+06	2.02955	0	0.86	1	1	2.09322	0.86	1	1	1.55101	6.5	1.64614e+07
P62911	60S ribosomal protein L32 OS=Mus musculus OX=10090 GN=Rpl32 PE=1 SV=2 - [RL32_MOUSE]	2	6186258	5.36724e+06	1.1526	5.87118	17.04	2	2	5.61948	17.04	2	2	6	6	3.66352e+08	1.90014e+08	1.92803	18.1693	40	6	8	12.0994	34.81	5	5	1.54031	4	1.86269e+08
P62281	40S ribosomal protein S11 OS=Mus musculus OX=10090 GN=Rps11 PE=1 SV=3 - [RS11_MOUSE]	9	2.378e+08	1.44358e+08	1.64729	21.5929	55.7	9	13	15.6727	41.77	6	7	3	3	4.0421e+07	2.82432e+07	1.43118	10.6314	23.42	3	4	6.58505	18.35	2	2	1.53923	6	1.3911e+08
Q9Z2X1	Heterogeneous nuclear ribonucleoprotein F OS=Mus musculus OX=10090 GN=Hnrnpf PE=1 SV=3 - [HNRPF_MOUSE]	3	1.5363e+07	8.13528e+06	1.88844	3.24895	4.1	1	1	8.33428	11.81	4	4	5	5	2.53812e+07	2.13849e+07	1.18687	13.4737	16.87	5	5	9.95834	7.95	2	3	1.53766	3	2.03721e+07
Q9ESV0	ATP-dependent RNA helicase DDX24 OS=Mus musculus OX=10090 GN=Ddx24 PE=1 SV=2 - [DDX24_MOUSE]	8	1.01846e+07	6.62967e+06	1.53621	12.0762	8.4	5	5	14.4991	10.15	6	6														1.53621	5	1.01846e+07
Q9WUA3	ATP-dependent 6-phosphofructokinase, platelet type OS=Mus musculus OX=10090 GN=Pfkp PE=1 SV=1 - [PFKAP_MOUSE]	4	1.36105e+07	8.19417e+06	1.66099	12.0785	9.95	4	4	9.33706	7.02	3	3	18	20	1.08053e+08	7.74142e+07	1.39578	47.7401	30.36	15	16	36.4296	24.87	13	14	1.52839	9.5	6.08317e+07
Q8C8R3	Ankyrin-2 OS=Mus musculus OX=10090 GN=Ank2 PE=1 SV=2 - [ANK2_MOUSE]	2	1.79764e+07	0		2.73876	0.51	1	1	0	0.15	1	1	5	6	8.55475e+06	5.61056e+06	1.52476	6.78488	1.39	5	5	6.40058	1	3	3	1.52476	3	1.32656e+07
P18872	Guanine nucleotide-binding protein G(o) subunit alpha OS=Mus musculus OX=10090 GN=Gnao1 PE=1 SV=3 - [GNAO_MOUSE]													3	4	1.09078e+08	7.16512e+07	1.52235	5.45649	7.91	2	2	10.2461	15.25	4	4	1.52235	2	1.09078e+08
O09167	60S ribosomal protein L21 OS=Mus musculus OX=10090 GN=Rpl21 PE=1 SV=3 - [RL21_MOUSE]	1	39458313	2.64793e+07	1.49016	3.2809	9.38	1	1	2.66448	9.38	1	1	3	3	1.5937e+08	1.03073e+08	1.54618	9.27474	20.63	3	5	10.9133	20.63	3	5	1.51817	2	9.94143e+07
P50446	Keratin, type II cytoskeletal 6A OS=Mus musculus OX=10090 GN=Krt6a PE=1 SV=3 - [K2C6A_MOUSE]	5	4.28078e+08	2.32592e+08	1.84047	39.945	16.46	9	18	21.3023	11.93	7	11	1	11	9.06189e+08	7.60041e+08	1.19229	39.1341	10.13	8	18	41.5686	14.1	9	19	1.51638	8.5	6.67134e+08
P12382	ATP-dependent 6-phosphofructokinase, liver type OS=Mus musculus OX=10090 GN=Pfkl PE=1 SV=4 - [PFKAL_MOUSE]	10	3.16013e+07	2.02552e+07	1.56015	31.1116	19.74	10	11	20.5361	13.21	6	7	12	15	1.59509e+08	1.10573e+08	1.44258	51.1915	25	13	17	47.2127	24.1	13	16	1.50137	11.5	9.55554e+07
Q9D2G2	Dihydrolipoyllysine-residue succinyltransferase component of 2-oxoglutarate dehydrogenase complex, mitochondrial OS=Mus musculus OX=10090 GN=Dlst PE=1 SV=1 - [ODO2_MOUSE]													2	2	7.25189e+06	4.86415e+06	1.49088	2.19929	2.64	1	1	2.14654	5.29	2	2	1.49088	1	7.25189e+06
O88738	Baculoviral IAP repeat-containing protein 6 OS=Mus musculus OX=10090 GN=Birc6 PE=1 SV=2 - [BIRC6_MOUSE]	50	2.58258e+07	2.2161e+07	1.16537	84.8907	10.61	35	35	90.0622	12.02	38	38	48	48	9.01571e+07	4.96482e+07	1.81592	108.069	11.7	36	39	110.144	11	37	42	1.49065	35.5	5.79914e+07
P68373	Tubulin alpha-1C chain OS=Mus musculus OX=10090 GN=Tuba1c PE=1 SV=1 - [TBA1C_MOUSE]	1	1.96293e+08	1.29707e+08	1.51336	56.3688	41.43	12	20	43.4689	39.87	13	16	1	21	1.5278e+09	1.04704e+09	1.45916	144.471	59.24	21	53	125.332	49.44	18	47	1.48626	16.5	8.62046e+08
P68369	Tubulin alpha-1A chain OS=Mus musculus OX=10090 GN=Tuba1a PE=1 SV=1 - [TBA1A_MOUSE]	1	1.96293e+08	1.29707e+08	1.51336	52.8279	35.92	11	19	47.814	45.01	14	17	1	21	1.5278e+09	1.04704e+09	1.45916	142.623	53.66	20	53	131.639	54.55	19	48	1.48626	15.5	8.62046e+08
P62245	40S ribosomal protein S15a OS=Mus musculus OX=10090 GN=Rps15a PE=1 SV=2 - [RS15A_MOUSE]	2	7379153	4.70492e+06	1.56839	0	5.38	1	1	1.7423	6.92	1	1	4	4	3.44897e+07	2.49527e+07	1.3822	5.19671	23.85	3	3	10.2355	39.23	4	4	1.4753	2	2.09344e+07
P17809	Solute carrier family 2, facilitated glucose transporter member 1 OS=Mus musculus OX=10090 GN=Slc2a1 PE=1 SV=4 - [GTR1_MOUSE]	2	4.92492e+06	1.08268e+07	0.454884	2.0411	1.63	1	1	3.93594	3.66	2	2	4	4	2.6201e+07	1.06238e+07	2.46625	4.4502	5.08	4	4	3.873	3.66	2	2	1.46057	2.5	1.5563e+07
Q8BG39	Synaptic vesicle glycoprotein 2B OS=Mus musculus OX=10090 GN=Sv2b PE=1 SV=1 - [SV2B_MOUSE]													1	1	1.77152e+07	1.21342e+07	1.45994	2.99532	2.05	1	1	3.08435	2.05	1	1	1.45994	1	1.77152e+07
Q9D3A8	Carboxyl-terminal PDZ ligand of neuronal nitric oxide synthase protein OS=Mus musculus OX=10090 GN=Nos1ap PE=1 SV=3 - [CAPON_MOUSE]	8	1.66669e+07	1.48758e+07	1.1204	12.8336	17.5	6	6	13.4359	13.72	6	7	11	11	7.16279e+07	3.99619e+07	1.7924	23.0341	19.09	10	12	7.08973	7.75	4	4	1.4564	8	4.41474e+07
P68254	14-3-3 protein theta OS=Mus musculus OX=10090 GN=Ywhaq PE=1 SV=1 - [1433T_MOUSE]	2	2.45768e+06	4.58864e+06	0.535601	2.53315	5.71	1	1	3.19289	8.98	2	2	3	3	1.45451e+07	6.1559e+06	2.36279	4.82082	11.84	3	3	2.86991	5.71	1	1	1.44919	2	8.50138e+06
Q9WV92	Band 4.1-like protein 3 OS=Mus musculus OX=10090 GN=Epb41l3 PE=1 SV=1 - [E41L3_MOUSE]	12	3.8165e+07	3.43951e+07	1.1096	27.7697	19.27	11	11	25.9459	18.51	13	14	12	13	6.44057e+07	3.60661e+07	1.78577	26.2832	19.91	13	14	9.1537	7.21	6	6	1.44769	12	5.12853e+07
P68368	Tubulin alpha-4A chain OS=Mus musculus OX=10090 GN=Tuba4a PE=1 SV=1 - [TBA4A_MOUSE]	2	1.18683e+08	8.29772e+07	1.43031	40.4294	32.37	10	15	30.6733	30.36	9	11	5	21	1.5278e+09	1.04704e+09	1.45916	112.836	49.78	20	41	108.447	53.57	20	40	1.44473	15	8.23241e+08
P27659	60S ribosomal protein L3 OS=Mus musculus OX=10090 GN=Rpl3 PE=1 SV=3 - [RL3_MOUSE]	11	5.02338e+07	5.59019e+07	0.898606	25.0022	26.05	9	9	22.48	22.08	9	9	30	30	2.68538e+09	1.35554e+09	1.98104	168.486	59.8	26	65	132.92	57.07	26	47	1.43982	17.5	1.36781e+09
Q8CI03	FLYWCH-type zinc finger-containing protein 1 OS=Mus musculus OX=10090 GN=Flywch1 PE=1 SV=2 - [FWCH1_MOUSE]	6	3.10357e+07	2.61439e+07	1.18711	14.4388	10.7	5	5	13.2524	8.62	4	4	3	3	2.7387e+07	1.62007e+07	1.69048	9.7074	6.84	3	3	3.13461	2.53	1	1	1.4388	4	2.92113e+07
Q3TKT4	Transcription activator BRG1 OS=Mus musculus OX=10090 GN=Smarca4 PE=1 SV=1 - [SMCA4_MOUSE]	4	8.97351e+06	6.24841e+06	1.43613	16.9148	5.08	7	7	12.3111	3.72	5	5														1.43613	7	8.97351e+06
Q00PI9	Heterogeneous nuclear ribonucleoprotein U-like protein 2 OS=Mus musculus OX=10090 GN=Hnrnpul2 PE=1 SV=2 - [HNRL2_MOUSE]	12	2.34055e+07	2.3305e+07	1.00431	20.342	13.29	10	10	14.3858	10.2	6	6	5	5	2.20931e+07	1.18361e+07	1.86659	8.12888	5.64	3	3	7.90116	5.5	3	3	1.43545	6.5	2.27493e+07
Q9DBR0	A-kinase anchor protein 8 OS=Mus musculus OX=10090 GN=Akap8 PE=1 SV=1 - [AKAP8_MOUSE]	2	4.63071e+06	3.228e+06	1.43455	2.27853	1.89	1	1	5.92129	7.13	2	2														1.43455	1	4.63071e+06
Q8VDN2	Sodium/potassium-transporting ATPase subunit alpha-1 OS=Mus musculus OX=10090 GN=Atp1a1 PE=1 SV=1 - [AT1A1_MOUSE]													5	19	1.46743e+08	1.02508e+08	1.43152	39.133	22.09	17	17	42.077	17.69	14	16	1.43152	17	1.46743e+08
Q9D0E1	Heterogeneous nuclear ribonucleoprotein M OS=Mus musculus OX=10090 GN=Hnrnpm PE=1 SV=3 - [HNRPM_MOUSE]	32	1.04076e+08	8.46187e+07	1.22994	88.3718	41.29	27	35	71.6494	42.8	27	30	23	23	1.30419e+08	7.98855e+07	1.63257	57.735	30.86	19	25	48.046	27.71	17	19	1.43126	23	1.17248e+08
P35550	rRNA 2'-O-methyltransferase fibrillarin OS=Mus musculus OX=10090 GN=Fbl PE=1 SV=2 - [FBRL_MOUSE]													3	3	7.63846e+06	5.33944e+06	1.43057	3.6147	9.17	2	2	2.10279	5.5	2	2	1.43057	2	7.63846e+06
P62900	60S ribosomal protein L31 OS=Mus musculus OX=10090 GN=Rpl31 PE=1 SV=1 - [RL31_MOUSE]	2	8.72125e+06	6.11015e+06	1.42734	4.28461	17.6	2	2	1.90519	6.4	1	1														1.42734	2	8.72125e+06
Q8BRB7	Histone acetyltransferase KAT6B OS=Mus musculus OX=10090 GN=Kat6b PE=1 SV=3 - [KAT6B_MOUSE]	1	2.48788e+07	1.74983e+07	1.42179	13.3805	2.72	4	5	9.62908	2.51	4	4														1.42179	4	2.48788e+07
Q7SIG6	Arf-GAP with SH3 domain, ANK repeat and PH domain-containing protein 2 OS=Mus musculus OX=10090 GN=Asap2 PE=1 SV=3 - [ASAP2_MOUSE]	1	9.40439e+08	5.77831e+08	1.62753	4.27435	0.84	1	2	3.654	0.84	1	2	1	1	2746451304	2259452451	1.21554	0	0.84	1	1	3.86102	0.84	1	2	1.42154	1	1.84345e+09
P14131	40S ribosomal protein S16 OS=Mus musculus OX=10090 GN=Rps16 PE=1 SV=4 - [RS16_MOUSE]	1	2.05693e+07	1.45113e+07	1.41747	2.08008	6.85	1	1	1.80931	6.85	1	1														1.41747	1	2.05693e+07
Q80XI4	Phosphatidylinositol 5-phosphate 4-kinase type-2 beta OS=Mus musculus OX=10090 GN=Pip4k2b PE=1 SV=1 - [PI42B_MOUSE]	6	5.65236e+07	4.48459e+07	1.2604	20.4521	20.19	7	8	17.7136	22.12	7	8	9	15	1.31977e+08	8.45535e+07	1.56087	31.7744	29.57	11	12	35.3854	27.4	11	12	1.41064	9	9.42505e+07
Q8BFR5	Elongation factor Tu, mitochondrial OS=Mus musculus OX=10090 GN=Tufm PE=1 SV=1 - [EFTU_MOUSE]													7	7	4.65274e+07	3.30379e+07	1.40831	13.7003	16.81	5	5	14.6731	19.25	6	7	1.40831	5	4.65274e+07
Q920N2	Biotin--protein ligase OS=Mus musculus OX=10090 GN=Hlcs PE=1 SV=1 - [BPL1_MOUSE]													2	2	2.16848e+06	1.55392e+06	1.39548	3.03032	1.66	1	1	1.65986	0.97	1	1	1.39548	1	2.16848e+06
Q99N91	39S ribosomal protein L34, mitochondrial OS=Mus musculus OX=10090 GN=Mrpl34 PE=1 SV=1 - [RM34_MOUSE]	2	2.71536e+07	1.58902e+07	1.70883	2.49706	13.04	1	1	4.04839	23.91	2	2	4	4	2.91762e+08	2.69863e+08	1.08115	8.14106	14.13	2	3	17.1028	26.09	4	7	1.39499	1.5	1.59458e+08
Q3TES0	IQ motif and SEC7 domain-containing protein 3 OS=Mus musculus OX=10090 GN=Iqsec3 PE=1 SV=1 - [IQEC3_MOUSE]	13	4.77046e+06	6.1465e+06	0.776127	29.0216	15.4	11	11	21.3954	11.05	8	8	8	9	3.73353e+07	1.85466e+07	2.01306	23.2519	13.05	9	9	13.6642	5.36	5	6	1.39459	10	2.10529e+07
Q6ZWN5	40S ribosomal protein S9 OS=Mus musculus OX=10090 GN=Rps9 PE=1 SV=3 - [RS9_MOUSE]	13	2.84172e+08	2.30375e+08	1.23352	23.7981	39.18	13	17	17.0377	29.9	9	11	9	9	2.69059e+08	1.7485e+08	1.5388	19.112	37.11	8	10	16.4638	31.44	8	8	1.38616	10.5	2.76616e+08
Q9CYI4	Putative RNA-binding protein Luc7-like 1 OS=Mus musculus OX=10090 GN=Luc7l PE=1 SV=2 - [LUC7L_MOUSE]	1	2.54736e+07	1.84427e+07	1.38123	5.29618	5.39	2	3	7.31067	9.43	3	3														1.38123	2	2.54736e+07
Q8C8Y5	Sterile alpha motif domain-containing protein 7 OS=Mus musculus OX=10090 GN=Samd7 PE=2 SV=4 - [SAMD7_MOUSE]	4	4.19188e+06	4.18246e+06	1.00225	7.47227	8.76	3	3	2.23823	2.25	1	1	4	4	1.02637e+07	5.85397e+06	1.75329	12.6949	15.96	4	4	3.04776	2.47	1	1	1.37777	3.5	7.22779e+06
Q91VN6	Probable ATP-dependent RNA helicase DDX41 OS=Mus musculus OX=10090 GN=Ddx41 PE=1 SV=2 - [DDX41_MOUSE]	7	1.09076e+07	7.93639e+06	1.37438	8.34822	7.88	4	4	12.6254	13.5	7	7	1	1	6.28176e+06	0		1.80502	1.77	1	1					1.37438	2.5	8.5947e+06
Q569Z6	Thyroid hormone receptor-associated protein 3 OS=Mus musculus OX=10090 GN=Thrap3 PE=1 SV=1 - [TR150_MOUSE]	4	7.36161e+06	5.37793e+06	1.36885	6.84541	4.1	2	2	4.26575	4.1	3	3														1.36885	2	7.36161e+06
Q80Y44	Probable ATP-dependent RNA helicase DDX10 OS=Mus musculus OX=10090 GN=Ddx10 PE=1 SV=2 - [DDX10_MOUSE]	5	6.43432e+06	4.7165e+06	1.36422	10.9054	7.09	4	5	14.8578	8.11	5	6														1.36422	4	6.43432e+06
Q9EQ61	Pescadillo homolog OS=Mus musculus OX=10090 GN=Pes1 PE=1 SV=1 - [PESC_MOUSE]	12	4.299e+07	3.15151e+07	1.36411	21.0059	18.49	10	11	10.3925	10.45	6	6	2	2	7.23964e+06	0		1.63461	3.25	2	2					1.36411	6	2.51148e+07
Q8K284	General transcription factor 3C polypeptide 1 OS=Mus musculus OX=10090 GN=Gtf3c1 PE=1 SV=2 - [TF3C1_MOUSE]	8	5.60008e+06	4105473	1.36405	16.3471	4.66	8	8	15.8325	4.09	7	7														1.36405	8	5.60008e+06
Q8C5T8	Coiled-coil domain-containing protein 113 OS=Mus musculus OX=10090 GN=Ccdc113 PE=2 SV=1 - [CC113_MOUSE]	1	1.51381e+07	1.11511e+07	1.35754	1.62776	1.59	1	1	0	1.59	1	1														1.35754	1	1.51381e+07
Q8C176	Transcription initiation factor TFIID subunit 2 OS=Mus musculus OX=10090 GN=Taf2 PE=2 SV=2 - [TAF2_MOUSE]	5	6.58135e+06	4.85078e+06	1.35676	7.55903	3.99	3	3	8.59885	4.53	4	4														1.35676	3	6.58135e+06
Q8BVY0	Ribosomal L1 domain-containing protein 1 OS=Mus musculus OX=10090 GN=Rsl1d1 PE=1 SV=1 - [RL1D1_MOUSE]	19	9.01349e+07	6.92929e+07	1.30078	54.0001	38.94	15	20	48.7124	39.38	16	19	6	6	3.23401e+07	2.29276e+07	1.41053	11.5114	13.27	5	5	7.30334	9.51	3	3	1.35566	10	6.12375e+07
Q91XM9	Disks large homolog 2 OS=Mus musculus OX=10090 GN=Dlg2 PE=1 SV=2 - [DLG2_MOUSE]	11	2.79712e+07	1.4067e+07	1.98844	25.4484	15.73	9	9	24.8332	17.25	9	9	16	16	1.08617e+08	1.52209e+08	0.713603	37.0349	19.25	11	13	37.8188	18.43	11	13	1.35102	10	6.8294e+07
Q6PAL7	AT-hook DNA-binding motif-containing protein 1 OS=Mus musculus OX=10090 GN=Ahdc1 PE=1 SV=1 - [AHDC1_MOUSE]	26	4.64898e+07	3.44536e+07	1.34935	53.8443	20.33	22	22	56.4519	18.07	19	21														1.34935	22	4.64898e+07
Q64707	U2 small nuclear ribonucleoprotein auxiliary factor 35 kDa subunit-related protein 1 OS=Mus musculus OX=10090 GN=Zrsr1 PE=1 SV=1 - [U2AFL_MOUSE]	8	1.03215e+07	1.63098e+07	0.632841	11.4842	13.55	4	4	14.5621	18.22	6	6	3	3	9.86095e+06	4.77504e+06	2.0651	4.40756	4.21	2	2	4.61151	4.67	2	2	1.34897	3	1.00912e+07
Q8BG05	Heterogeneous nuclear ribonucleoprotein A3 OS=Mus musculus OX=10090 GN=Hnrnpa3 PE=1 SV=1 - [ROA3_MOUSE]	3	1.1107e+07	8.24622e+06	1.34692	2.49628	2.64	1	1	5.11811	10.29	3	3														1.34692	1	1.1107e+07
P15409	Rhodopsin OS=Mus musculus OX=10090 GN=Rho PE=1 SV=2 - [OPSD_MOUSE]	3	1.01913e+08	9.38252e+07	1.0862	15.6067	12.36	3	5	13.3155	12.36	3	5	5	5	4.21119e+08	2.62027e+08	1.60716	21.4227	15.8	4	9	22.5291	18.97	5	8	1.34668	3.5	2.61516e+08
P35980	60S ribosomal protein L18 OS=Mus musculus OX=10090 GN=Rpl18 PE=1 SV=3 - [RL18_MOUSE]													1	1	6.80933e+07	50584321	1.34613	1.96124	4.79	1	1	1.75916	4.79	1	1	1.34613	1	6.80933e+07
Q61656	Probable ATP-dependent RNA helicase DDX5 OS=Mus musculus OX=10090 GN=Ddx5 PE=1 SV=2 - [DDX5_MOUSE]	12	3.37413e+07	2.07907e+07	1.6229	24.0489	20.85	10	11	20.9038	15.15	9	10	4	4	1.56296e+07	1.48065e+07	1.05559	12.1426	6.68	3	4	3.80095	2.77	2	2	1.33925	6.5	2.46855e+07
Q91VE6	MKI67 FHA domain-interacting nucleolar phosphoprotein OS=Mus musculus OX=10090 GN=Nifk PE=1 SV=1 - [MK67I_MOUSE]	3	6.15088e+06	5.38178e+06	1.14291	2.34621	6.94	2	2	7.21724	10.09	3	3	4	4	3.06278e+07	1.99749e+07	1.53332	5.52109	9.15	2	2	6.46081	9.46	3	3	1.33811	2	1.83893e+07
Q52KI8	Serine/arginine repetitive matrix protein 1 OS=Mus musculus OX=10090 GN=Srrm1 PE=1 SV=2 - [SRRM1_MOUSE]	37	1.1666e+08	1.32362e+08	0.881372	102.154	32.77	28	38	94.9528	35.31	29	44	12	12	3.63252e+07	2.02909e+07	1.79022	17.6574	13.74	11	11	21.7296	9.09	8	9	1.3358	19.5	7.64926e+07
P97452	Ribosome biogenesis protein BOP1 OS=Mus musculus OX=10090 GN=Bop1 PE=1 SV=1 - [BOP1_MOUSE]	1	2.14428e+07	1.25456e+07	1.70919	0	0.82	1	1	0	0.82	1	1	1	1	7.98093e+08	8.29575e+08	0.962051	0	0.82	1	2	0	0.82	1	1	1.33562	1	4.09768e+08
Q8BH59	Calcium-binding mitochondrial carrier protein Aralar1 OS=Mus musculus OX=10090 GN=Slc25a12 PE=1 SV=1 - [CMC1_MOUSE]	10	1.08188e+07	9.93639e+06	1.08881	21.445	17.28	8	8	15.6383	14.33	7	7	12	12	4.97278e+07	3.15994e+07	1.5737	31.1875	25.55	11	12	15.8295	14.62	7	8	1.33125	9.5	3.02733e+07
Q9D7Z3	Nucleolar protein 7 OS=Mus musculus OX=10090 GN=Nol7 PE=1 SV=1 - [NOL7_MOUSE]	3	3.16355e+07	4.21994e+07	0.749666	11.5078	18.5	3	4	8.73314	18.5	3	3	3	3	4.86808e+07	2.55175e+07	1.90774	2.85869	5.51	1	1	5.84285	12.99	2	2	1.3287	2	4.01581e+07
Q9QX47	Protein SON OS=Mus musculus OX=10090 GN=Son PE=1 SV=2 - [SON_MOUSE]	58	4.46891e+08	3.79002e+08	1.17912	227.428	34	57	85	195.607	31.18	49	72	39	39	3.60689e+08	2.44649e+08	1.47431	118.799	21.44	34	43	84.1551	16.33	26	35	1.32672	45.5	4.0379e+08
A2AR02	Peptidyl-prolyl cis-trans isomerase G OS=Mus musculus OX=10090 GN=Ppig PE=1 SV=1 - [PPIG_MOUSE]	12	4.51969e+07	3.41639e+07	1.32294	21.0775	12.1	9	10	27.0288	14.76	10	11														1.32294	9	4.51969e+07
P99024	Tubulin beta-5 chain OS=Mus musculus OX=10090 GN=Tubb5 PE=1 SV=1 - [TBB5_MOUSE]	4	2.76627e+08	2.38615e+08	1.1593	69.2171	43.92	15	27	80.6306	55.63	16	33	5	28	1.75936e+09	1.18419e+09	1.48571	190.925	72.97	26	66	148.371	62.84	23	55	1.32251	20.5	1.01799e+09
Q9ERD7	Tubulin beta-3 chain OS=Mus musculus OX=10090 GN=Tubb3 PE=1 SV=1 - [TBB3_MOUSE]	1	2.76627e+08	2.38615e+08	1.1593	41.0857	28.44	9	15	40.2069	20.22	7	16	5	19	1.75936e+09	1.18419e+09	1.48571	102.624	45.56	18	40	72.0278	31.33	13	28	1.32251	13.5	1.01799e+09
Q6PIC6	Sodium/potassium-transporting ATPase subunit alpha-3 OS=Mus musculus OX=10090 GN=Atp1a3 PE=1 SV=1 - [AT1A3_MOUSE]	16	2.32509e+07	1.87812e+07	1.23799	35.5852	18.56	13	14	27.5245	14.81	11	11	16	30	1.5604e+08	1.11449e+08	1.4001	80.1312	34.75	27	31	86.4474	35.83	26	30	1.31905	20	8.96453e+07
Q9D6F9	Tubulin beta-4A chain OS=Mus musculus OX=10090 GN=Tubb4a PE=1 SV=3 - [TBB4A_MOUSE]	7	2.38331e+08	2.08684e+08	1.14206	78.8172	49.55	17	29	78.0162	66.89	18	30	7	25	1.75936e+09	1.18419e+09	1.48571	189.751	68.92	24	65	142.641	63.29	22	52	1.31389	20.5	9.98844e+08
Q7TMM9	Tubulin beta-2A chain OS=Mus musculus OX=10090 GN=Tubb2a PE=1 SV=1 - [TBB2A_MOUSE]	4	2.76627e+08	2.38615e+08	1.1593	75.1382	37.08	14	29	81.3213	48.54	16	33	8	27	1.68002e+09	1.14838e+09	1.46295	183.246	65.39	24	65	154.31	63.6	23	55	1.31112	19	9.78323e+08
Q8K310	Matrin-3 OS=Mus musculus OX=10090 GN=Matr3 PE=1 SV=1 - [MATR3_MOUSE]	14	1.49965e+07	1.05927e+07	1.41574	25.8176	17.26	10	11	30.6137	15.96	10	12	8	8	2.56134e+07	2.13385e+07	1.20034	20.2462	13	7	9	13.7953	11.58	6	7	1.30804	8.5	2.03049e+07
P62301	40S ribosomal protein S13 OS=Mus musculus OX=10090 GN=Rps13 PE=1 SV=2 - [RS13_MOUSE]	8	6.97741e+07	40820502	1.70929	14.1086	33.77	6	6	14.8571	37.75	6	7	8	8	1.15034e+08	1.278e+08	0.900103	12.5735	34.44	7	8	20.9346	39.07	7	11	1.3047	6.5	9.24038e+07
Q8R5C8	Zinc finger MYND domain-containing protein 11 OS=Mus musculus OX=10090 GN=Zmynd11 PE=1 SV=2 - [ZMY11_MOUSE]	8	2.28806e+07	1.76934e+07	1.29317	5.81974	5.32	4	4	12.1275	8.8	5	5														1.29317	4	2.28806e+07
P47857	ATP-dependent 6-phosphofructokinase, muscle type OS=Mus musculus OX=10090 GN=Pfkm PE=1 SV=3 - [PFKAM_MOUSE]													3	5	6.41499e+07	4.96202e+07	1.29282	5.83273	3.33	3	3	8.51273	6.28	4	4	1.29282	3	6.41499e+07
P16460	Argininosuccinate synthase OS=Mus musculus OX=10090 GN=Ass1 PE=1 SV=1 - [ASSY_MOUSE]													1	1	2.74025e+07	2.12213e+07	1.29128	2.816	3.4	1	1	3.78387	3.4	1	1	1.29128	1	2.74025e+07
Q2TV84	Transient receptor potential cation channel subfamily M member 1 OS=Mus musculus OX=10090 GN=Trpm1 PE=2 SV=2 - [TRPM1_MOUSE]	33	4.29244e+07	3.32455e+07	1.29113	73.2338	22.87	27	28	53.5424	16.4	21	22	1	1	9.4157e+06	0		2.53277	0.74	1	1					1.29113	14	2.617e+07
Q99KI0	Aconitate hydratase, mitochondrial OS=Mus musculus OX=10090 GN=Aco2 PE=1 SV=1 - [ACON_MOUSE]													1	1	1.46784e+07	1.14013e+07	1.28744	2.1181	1.15	1	1	2.27622	1.15	1	1	1.28744	1	1.46784e+07
Q925T6	Glutamate receptor-interacting protein 1 OS=Mus musculus OX=10090 GN=Grip1 PE=1 SV=1 - [GRIP1_MOUSE]	2	2.6637e+06	2.98149e+06	0.893414	5.34896	2.13	2	2	2.30721	0.71	1	1	1	1	1.5207e+06	909039	1.67286	2.1579	1.06	1	1	2.02016	1.06	1	1	1.28314	1.5	2.0922e+06
P60710	Actin, cytoplasmic 1 OS=Mus musculus OX=10090 GN=Actb PE=1 SV=1 - [ACTB_MOUSE]	10	4.79459e+07	3.50638e+07	1.36739	18.3333	31.2	8	8	17.4646	25.6	7	7	11	11	3.01619e+08	2.51865e+08	1.19754	47.8516	39.73	10	16	42.1262	36.53	10	15	1.28246	9	1.74782e+08
P20443	S-arrestin OS=Mus musculus OX=10090 GN=Sag PE=1 SV=1 - [ARRS_MOUSE]	5	1.08476e+07	5.51898e+06	1.96551	12.3901	18.36	4	4	9.30904	14.39	3	3	13	13	4.02798e+07	6.92855e+07	0.58136	8.88823	12.9	3	4	34.0023	47.15	13	13	1.27344	3.5	2.55637e+07
Q9D937	Uncharacterized protein C11orf98 homolog OS=Mus musculus OX=10090 PE=1 SV=1 - [CK098_MOUSE]	2	1.28674e+07	8.43716e+06	1.52508	2.93155	11.38	1	1	5.01526	22.76	2	2	2	2	6.69504e+07	6.55908e+07	1.02073	5.19499	19.51	2	2	8.80454	19.51	2	3	1.2729	1.5	3.99089e+07
P10922	Histone H1.0 OS=Mus musculus OX=10090 GN=H1-0 PE=2 SV=4 - [H10_MOUSE]	5	2.72437e+08	2.14374e+08	1.27085	16.7226	24.23	5	7	13.5803	20.1	4	6	7	7	6.34183e+09	4.9788e+09	1.27377	53.3207	21.13	5	23	64.7495	23.71	6	27	1.27231	5	3.30714e+09
Q6P4T2	U5 small nuclear ribonucleoprotein 200 kDa helicase OS=Mus musculus OX=10090 GN=Snrnp200 PE=1 SV=1 - [U520_MOUSE]	18	1.08639e+07	8.54338e+06	1.27162	36.1498	9.18	15	15	25.3897	6.09	10	10	1	1	4.03927e+06	0		2.78728	0.75	1	1					1.27162	8	7.45158e+06
Q9DBT5	AMP deaminase 2 OS=Mus musculus OX=10090 GN=Ampd2 PE=1 SV=1 - [AMPD2_MOUSE]	11	1.4515e+07	1.97678e+07	0.734272	14.6984	10.78	7	7	10.7362	10.78	8	8	2	2	1.63922e+07	9.06825e+06	1.80765	1.94868	1.63	2	2	2.01901	1.63	2	2	1.27096	4.5	1.54536e+07
P43275	Histone H1.1 OS=Mus musculus OX=10090 GN=H1-1 PE=1 SV=2 - [H11_MOUSE]	5	1.30043e+09	9.52406e+08	1.36542	23.3381	28.64	8	12	18.102	27.7	8	10	5	10	7.2981e+09	6.21067e+09	1.17509	27.294	22.54	7	16	43.9922	29.58	10	20	1.27025	7.5	4.29927e+09
Q9CPT5	Nucleolar protein 16 OS=Mus musculus OX=10090 GN=Nop16 PE=1 SV=1 - [NOP16_MOUSE]	7	2.46321e+07	1.70405e+07	1.4455	11.2846	33.71	5	5	12.19	32.58	6	7	10	10	9.75812e+07	8.92212e+07	1.0937	24.9791	43.26	7	9	24.6025	40.45	8	10	1.2696	6	6.11067e+07
Q80T69	Lysine-specific demethylase 9 OS=Mus musculus OX=10090 GN=Rsbn1 PE=1 SV=3 - [RSBN1_MOUSE]	23	1.66709e+08	1.35543e+08	1.22993	77.3881	42.14	22	29	55.5186	31.82	18	23	19	19	1.19442e+08	9.16393e+07	1.30339	38.9225	25.53	16	18	34.171	24.03	14	16	1.26666	19	1.43075e+08
Q68EF6	Brain-enriched guanylate kinase-associated protein OS=Mus musculus OX=10090 GN=Begain PE=1 SV=2 - [BEGIN_MOUSE]	18	2.79677e+07	2.141e+07	1.30629	35.7247	31	14	14	34.9557	26.83	11	11	28	28	1.51768e+08	1.25811e+08	1.20632	61.4115	49	21	23	69.7676	51.17	21	27	1.2563	17.5	8.98681e+07
P29974	cGMP-gated cation channel alpha-1 OS=Mus musculus OX=10090 GN=Cnga1 PE=2 SV=2 - [CNGA1_MOUSE]	24	6.839e+08	4.71851e+08	1.4494	90.0215	33.77	23	38	63.2145	23.83	15	26	3	3	1.78858e+07	1.68849e+07	1.05928	5.12771	4.09	3	3	4.49068	2.63	2	2	1.25434	13	3.50893e+08
Q8K007	Extracellular sulfatase Sulf-1 OS=Mus musculus OX=10090 GN=Sulf1 PE=2 SV=1 - [SULF1_MOUSE]	5	8.25963e+06	6.63407e+06	1.24503	6.64564	4.14	4	4	8.31772	4.6	4	6														1.24503	4	8.25963e+06
O70172	Phosphatidylinositol 5-phosphate 4-kinase type-2 alpha OS=Mus musculus OX=10090 GN=Pip4k2a PE=1 SV=1 - [PI42A_MOUSE]	2	4.94437e+07	3.95953e+07	1.24873	10.9075	15.06	5	5	7.37065	11.6	4	4	1	7	7.34184e+07	5.98344e+07	1.22703	14.5858	14.07	6	6	10.7783	6.67	3	3	1.23788	5.5	6.1431e+07
Q9Z2U2	Zinc finger protein 292 OS=Mus musculus OX=10090 GN=Zfp292 PE=1 SV=2 - [ZN292_MOUSE]	23	2.74426e+07	2.21721e+07	1.23771	43.0751	10.12	17	18	48.3016	11.3	18	18														1.23771	17	2.74426e+07
P41105	60S ribosomal protein L28 OS=Mus musculus OX=10090 GN=Rpl28 PE=1 SV=2 - [RL28_MOUSE]	6	3.60713e+07	3.81838e+07	0.944674	10.8218	22.63	4	5	3.82198	27.01	4	4	11	11	3.54665e+08	2.33795e+08	1.51699	17.1683	43.8	9	11	20.7362	48.91	8	10	1.23083	6.5	1.95368e+08
D3YXK2	Scaffold attachment factor B1 OS=Mus musculus OX=10090 GN=Safb PE=1 SV=2 - [SAFB1_MOUSE]	2	6.21368e+06	7.69944e+06	0.807031	12.436	7.47	4	4	11.2425	6.83	5	5	6	6	1.58826e+07	9.62865e+06	1.64951	7.20029	6.4	4	5	8.08204	8.96	4	4	1.22827	4	1.10481e+07
P15864	Histone H1.2 OS=Mus musculus OX=10090 GN=H1-2 PE=1 SV=2 - [H12_MOUSE]	3	2.22104e+09	2.12716e+09	1.04413	65.3007	31.6	10	34	68.9788	33.02	12	37	3	14	8.21427e+09	5.83687e+09	1.40731	104.63	23.11	10	45	154.44	28.3	14	66	1.22572	10	5.21766e+09
P62274	40S ribosomal protein S29 OS=Mus musculus OX=10090 GN=Rps29 PE=1 SV=2 - [RS29_MOUSE]	3	1.74655e+08	1.27436e+08	1.37052	6.04186	26.79	3	4	7.18555	26.79	3	5	3	3	6.75217e+08	6.26502e+08	1.07776	5.93795	14.29	2	5	8.14894	28.57	3	7	1.22414	2.5	4.24936e+08
Q8R5K4	Nucleolar protein 6 OS=Mus musculus OX=10090 GN=Nol6 PE=2 SV=2 - [NOL6_MOUSE]	4	8.52325e+06	6.99905e+06	1.21777	7.03705	3.91	4	4	7.80929	3.3	3	3														1.21777	4	8.52325e+06
Q91YE5	Bromodomain adjacent to zinc finger domain protein 2A OS=Mus musculus OX=10090 GN=Baz2a PE=1 SV=2 - [BAZ2A_MOUSE]	37	1.00068e+08	8.26989e+07	1.21002	93.3064	17.68	26	35	95.4521	19.38	31	40														1.21002	26	1.00068e+08
Q6PDZ2	TATA box-binding protein-associated factor RNA polymerase I subunit C OS=Mus musculus OX=10090 GN=Taf1c PE=1 SV=1 - [TAF1C_MOUSE]	5	7.12665e+06	5.38113e+06	1.32438	10.9786	7.78	4	4	13.0631	9.45	5	5	9	9	1.45825e+07	1.33156e+07	1.09514	13.3938	11.36	7	7	6.29966	9.33	6	6	1.20976	5.5	1.08546e+07
Q9DBY5	Chromobox protein homolog 6 OS=Mus musculus OX=10090 GN=Cbx6 PE=1 SV=2 - [CBX6_MOUSE]	1	2.30071e+06	1.91405e+06	1.20201	2.47858	4.59	1	1	2.98027	4.59	1	1														1.20201	1	2.30071e+06
B2RQC2	Ubiquitin carboxyl-terminal hydrolase 42 OS=Mus musculus OX=10090 GN=Usp42 PE=1 SV=1 - [UBP42_MOUSE]	4	6.18136e+06	5.14548e+06	1.20132	4.58336	1.81	2	2	11.6498	4	4	4														1.20132	2	6.18136e+06
P43276	Histone H1.5 OS=Mus musculus OX=10090 GN=H1-5 PE=1 SV=2 - [H15_MOUSE]	5	6.01742e+08	4.39004e+08	1.3707	18.5935	26.01	8	13	31.9223	30.04	8	18	9	13	3.92474e+09	3.80765e+09	1.03075	18.4818	22.42	8	12	45.6788	26.91	12	20	1.20073	8	2.26324e+09
Q8VE97	Serine/arginine-rich splicing factor 4 OS=Mus musculus OX=10090 GN=Srsf4 PE=2 SV=1 - [SRSF4_MOUSE]	2	6.70642e+06	5.59439e+06	1.19878	2.37197	3.89	2	2	3.1066	2.66	1	1														1.19878	2	6.70642e+06
Q8R0S2	IQ motif and SEC7 domain-containing protein 1 OS=Mus musculus OX=10090 GN=Iqsec1 PE=1 SV=2 - [IQEC1_MOUSE]	13	2.75379e+07	2.64212e+07	1.04227	30.3964	13.42	10	11	28.6783	13.84	11	12	15	17	8.12447e+07	6.00083e+07	1.35389	40.3348	17.17	14	16	40.9169	18.52	13	16	1.19808	12	5.43913e+07
B2RRD7	Peregrin OS=Mus musculus OX=10090 GN=Brpf1 PE=1 SV=1 - [BRPF1_MOUSE]	2	3.59733e+06	3.00863e+06	1.19567	1.81216	0.66	1	1	0	0.66	1	1														1.19567	1	3.59733e+06
P16858	Glyceraldehyde-3-phosphate dehydrogenase OS=Mus musculus OX=10090 GN=Gapdh PE=1 SV=2 - [G3P_MOUSE]	10	4.54655e+07	3.58437e+07	1.26844	23.8036	40.54	9	9	21.8252	36.04	8	9	15	15	2.04856e+08	1.83293e+08	1.11765	37.1144	45.95	12	16	41.8488	42.64	12	15	1.19304	10.5	1.25161e+08
Q9D7V9	N-acylethanolamine-hydrolyzing acid amidase OS=Mus musculus OX=10090 GN=Naaa PE=1 SV=2 - [NAAA_MOUSE]	1	5.87537e+07	4.92731e+07	1.19241	3.67551	4.7	1	1	3.05462	4.7	1	1														1.19241	1	5.87537e+07
Q8BGZ7	Keratin, type II cytoskeletal 75 OS=Mus musculus OX=10090 GN=Krt75 PE=1 SV=1 - [K2C75_MOUSE]													1	10	9.06189e+08	7.60041e+08	1.19229	39.2103	10.53	8	18	36.9453	10.53	7	17	1.19229	8	9.06189e+08
Q99MR8	Methylcrotonoyl-CoA carboxylase subunit alpha, mitochondrial OS=Mus musculus OX=10090 GN=Mccc1 PE=1 SV=2 - [MCCA_MOUSE]	44	5.34616e+08	5.48046e+08	0.975496	218.901	68.48	41	81	189.047	62.9	39	71	50	50	3.9319e+09	2.79178e+09	1.40839	489.464	70.99	46	170	473.82	70.15	47	162	1.19194	43.5	2.23326e+09
Q99LX5	Multiple myeloma tumor-associated protein 2 homolog OS=Mus musculus OX=10090 GN=Mmtag2 PE=2 SV=1 - [MMTA2_MOUSE]	6	1.95392e+07	2.64651e+07	0.738299	12.8039	19.62	4	5	16.8271	26.92	6	7	5	5	2.23918e+07	1.36699e+07	1.63804	11.0823	16.15	4	4	8.33736	20	4	4	1.18817	4	2.09655e+07
Q8VDP4	Cell cycle and apoptosis regulator protein 2 OS=Mus musculus OX=10090 GN=Ccar2 PE=1 SV=2 - [CCAR2_MOUSE]	3	3.40494e+06	3.98583e+06	0.854261	3.27815	3.47	1	1	4.8822	2.71	2	2	4	4	6.35512e+06	4.22286e+06	1.50493	7.89834	3.8	3	4	5.12546	2.39	2	2	1.1796	2	4.88003e+06
Q03265	ATP synthase subunit alpha, mitochondrial OS=Mus musculus OX=10090 GN=Atp5f1a PE=1 SV=1 - [ATPA_MOUSE]	9	1.55238e+07	1.25683e+07	1.23515	24.6579	19.71	7	9	19.0329	14.65	6	7	16	16	1.06515e+08	9.58567e+07	1.11119	38.7093	24.59	12	15	45.1227	29.11	13	16	1.17317	9.5	6.10196e+07
Q99MN9	Propionyl-CoA carboxylase beta chain, mitochondrial OS=Mus musculus OX=10090 GN=Pccb PE=1 SV=2 - [PCCB_MOUSE]	16	6.58744e+07	5.63718e+07	1.16857	40.4166	36.6	14	16	46.3988	35.3	14	17	20	20	2.96443e+08	2.56542e+08	1.15554	72.9429	45.29	18	27	72.16	49.91	19	27	1.16205	16	1.81159e+08
P62830	60S ribosomal protein L23 OS=Mus musculus OX=10090 GN=Rpl23 PE=1 SV=1 - [RL23_MOUSE]	6	4.63795e+07	3.10315e+07	1.4946	9.81766	50	6	6	12.4216	45.71	5	5	5	5	2.15906e+07	2.60449e+07	0.828974	2.95225	30.71	3	3	7.43309	34.29	3	3	1.16178	4.5	3.3985e+07
Q64511	DNA topoisomerase 2-beta OS=Mus musculus OX=10090 GN=Top2b PE=1 SV=2 - [TOP2B_MOUSE]	6	2.91738e+06	5.34644e+06	0.545667	6.2745	2.11	3	3	7.02245	3.66	5	5	1	1	3.37947e+06	1.90275e+06	1.77609	0	0.56	1	1	2.27605	0.56	1	1	1.16088	2	3.14842e+06
Q6ZPZ3	Zinc finger CCCH domain-containing protein 4 OS=Mus musculus OX=10090 GN=Zc3h4 PE=1 SV=2 - [ZC3H4_MOUSE]	11	1.6191e+07	1.97437e+07	0.820063	19.3138	9.28	5	6	28.053	13.19	10	10	3	3	9.58672e+06	6.40826e+06	1.496	8.50017	3.91	3	3	2.54058	1.23	1	1	1.15803	4	1.28889e+07
Q3UHX9	Putative methyltransferase C9orf114 homolog OS=Mus musculus OX=10090 GN=Spout1 PE=1 SV=1 - [CI114_MOUSE]	7	1.17505e+07	8.04548e+06	1.46051	8.77785	14.55	3	3	10.6343	17.14	5	5	1	1	6.73824e+06	7.91964e+06	0.850827	2.36983	2.6	1	1	1.75734	2.6	1	1	1.15567	2	9.24438e+06
Q9QZE7	Translin-associated protein X OS=Mus musculus OX=10090 GN=Tsnax PE=1 SV=1 - [TSNAX_MOUSE]	1	2.41323e+07	2.08893e+07	1.15524	1.89333	3.1	1	1	1.80304	3.1	1	1														1.15524	1	2.41323e+07
Q8BTI8	Serine/arginine repetitive matrix protein 2 OS=Mus musculus OX=10090 GN=Srrm2 PE=1 SV=3 - [SRRM2_MOUSE]	121	4.61336e+08	3.36947e+08	1.36916	518.652	50.65	109	212	484.152	50.68	106	211	70	70	1.64273e+08	1.7546e+08	0.93624	179.538	28.63	53	82	222.559	34.04	64	87	1.1527	81	3.12805e+08
O70318	Band 4.1-like protein 2 OS=Mus musculus OX=10090 GN=Epb41l2 PE=1 SV=2 - [E41L2_MOUSE]	19	5.70812e+07	4.82156e+07	1.18387	49.0942	21.76	14	18	51.3541	26.62	21	23	16	17	6.77419e+07	6.05334e+07	1.11908	28.8142	16.4	9	10	33.0492	17	13	13	1.15148	11.5	6.24115e+07
Q8CDM1	ATPase family AAA domain-containing protein 2 OS=Mus musculus OX=10090 GN=Atad2 PE=1 SV=1 - [ATAD2_MOUSE]	3	2.11605e+07	1.87125e+07	1.13083	4.4794	2.6	3	3	1.64268	0.58	1	1	2	2	3.67105e+07	3.15144e+07	1.16488	3.53378	1.25	2	2	3.6333	1.25	2	2	1.14785	2.5	2.89355e+07
O35737	Heterogeneous nuclear ribonucleoprotein H OS=Mus musculus OX=10090 GN=Hnrnph1 PE=1 SV=3 - [HNRH1_MOUSE]	5	1.90738e+07	1.19627e+07	1.59444	15.0685	16.7	5	5	13.486	17.15	5	5	1	3	1.18389e+07	1.69067e+07	0.700251	2.22068	3.34	2	2	0	2.67	2	3	1.14735	3.5	1.54564e+07
Q8VEK3	Heterogeneous nuclear ribonucleoprotein U OS=Mus musculus OX=10090 GN=Hnrnpu PE=1 SV=1 - [HNRPU_MOUSE]	15	7.124e+07	6.18275e+07	1.15224	33.966	20.63	14	16	27.1762	20	12	12	11	11	7.33214e+07	6.49839e+07	1.1283	22.6636	12.75	9	10	19.3433	11.13	7	9	1.14027	11.5	7.22807e+07
P62983	Ubiquitin-40S ribosomal protein S27a OS=Mus musculus OX=10090 GN=Rps27a PE=1 SV=2 - [RS27A_MOUSE]	8	1.94942e+08	2.01886e+08	0.965604	31.1762	50.64	7	11	16.4451	40.38	5	6	7	7	9.31509e+08	7.114e+08	1.3094	51.7079	44.87	5	19	49.4225	54.49	7	19	1.1375	6	5.63226e+08
Q0VEE6	Zinc finger protein 800 OS=Mus musculus OX=10090 GN=Znf800 PE=1 SV=1 - [ZN800_MOUSE]	7	9.76275e+06	1.91376e+07	0.510134	8.41206	7.7	5	5	12.3906	10.73	5	5	10	10	1.09973e+08	6.24404e+07	1.76124	19.9619	17.82	8	8	13.908	15.41	6	6	1.13569	6.5	5.98677e+07
Q91ZA3	Propionyl-CoA carboxylase alpha chain, mitochondrial OS=Mus musculus OX=10090 GN=Pcca PE=1 SV=2 - [PCCA_MOUSE]	53	1.35834e+09	1.22092e+09	1.11256	330.62	69.89	52	123	286.183	65.33	44	111	61	61	1.06068e+10	9.22102e+09	1.15028	885.738	66.16	49	321	865.278	75.97	60	311	1.13142	50.5	5.98257e+09
P42932	T-complex protein 1 subunit theta OS=Mus musculus OX=10090 GN=Cct8 PE=1 SV=3 - [TCPQ_MOUSE]	26	6.61386e+07	6.27324e+07	1.0543	55.3404	47.26	22	22	44.0172	40.51	20	20	33	33	3.36339e+08	2.79053e+08	1.20529	85.8447	54.01	26	35	79.3801	55.66	29	32	1.12979	24	2.01239e+08
P62702	40S ribosomal protein S4, X isoform OS=Mus musculus OX=10090 GN=Rps4x PE=1 SV=2 - [RS4X_MOUSE]	13	9.83165e+07	8.98683e+07	1.09401	18.3696	37.26	9	9	17.6872	39.92	10	13	8	8	7.09458e+07	6.16227e+07	1.15129	19.41	31.56	8	10	19.1824	31.56	8	9	1.12265	8.5	8.46311e+07
Q8K0E8	Fibrinogen beta chain OS=Mus musculus OX=10090 GN=Fgb PE=1 SV=1 - [FIBB_MOUSE]	3	1.08931e+07	0		8.8308	8.73	3	3					4	4	7.52943e+06	6.71024e+06	1.12208	8.72469	11.43	3	3	8.72041	9.98	3	3	1.12208	3	9.21126e+06
P62849	40S ribosomal protein S24 OS=Mus musculus OX=10090 GN=Rps24 PE=1 SV=1 - [RS24_MOUSE]	4	3.50526e+07	3.19841e+07	1.09594	4.34212	18.05	2	2	2.34357	28.57	4	4	4	4	2.04815e+08	1.7912e+08	1.14345	20.8914	29.32	4	9	18.7869	29.32	4	8	1.11969	3	1.19934e+08
Q9WVG9	Male-specific lethal 3 homolog OS=Mus musculus OX=10090 GN=Msl3 PE=1 SV=3 - [MS3L1_MOUSE]	4	2.70481e+06	2.42057e+06	1.11743	7.01806	6.48	3	3	4.90585	4.19	2	2	1	1	0	0						0	2.1	1	1	1.11743	3	1.35241e+06
Q3UQU0	Bromodomain-containing protein 9 OS=Mus musculus OX=10090 GN=Brd9 PE=1 SV=1 - [BRD9_MOUSE]	3	4.86067e+06	4.35307e+06	1.11661	7.52893	7.72	3	3	2.5837	4.53	2	2														1.11661	3	4.86067e+06
Q9QYX7	Protein piccolo OS=Mus musculus OX=10090 GN=Pclo PE=1 SV=4 - [PCLO_MOUSE]	20	1.09026e+07	1.26779e+07	0.859969	31.8273	4.26	12	12	46.1165	5.43	17	17	15	16	2.48565e+07	1.81244e+07	1.37144	24.307	2.82	11	12	23.876	3.22	9	9	1.1157	11.5	1.78796e+07
Q91ZW3	SWI/SNF-related matrix-associated actin-dependent regulator of chromatin subfamily A member 5 OS=Mus musculus OX=10090 GN=Smarca5 PE=1 SV=1 - [SMCA5_MOUSE]	32	9.40472e+07	8.43323e+07	1.1152	87.7024	34.16	37	42	102.599	37.2	37	45														1.1152	37	9.40472e+07
P43274	Histone H1.4 OS=Mus musculus OX=10090 GN=H1-4 PE=1 SV=2 - [H14_MOUSE]	3	2.35142e+09	2.27517e+09	1.03352	75.4567	37.44	13	43	86.0599	38.36	13	43	4	16	1.19978e+10	1.00406e+10	1.19493	101.486	29.68	12	45	150.519	31.96	16	61	1.11422	12.5	7.17459e+09
Q08288	Cell growth-regulating nucleolar protein OS=Mus musculus OX=10090 GN=Lyar PE=1 SV=2 - [LYAR_MOUSE]	30	4.83307e+08	5.14285e+08	0.939766	125.803	44.33	24	47	132.212	44.59	27	47	17	17	1.54432e+08	1.20342e+08	1.28328	38.9768	33.76	11	13	52.8444	46.39	15	20	1.11152	17.5	3.18869e+08
P08775	DNA-directed RNA polymerase II subunit RPB1 OS=Mus musculus OX=10090 GN=Polr2a PE=1 SV=3 - [RPB1_MOUSE]	43	6.53892e+07	5.89354e+07	1.10951	71.5575	19.39	29	30	91.4847	25.74	40	42	1	1	4.1438e+06	0		0	0.36	1	1					1.10951	15	3.47665e+07
Q9QYM8	Centromere protein H OS=Mus musculus OX=10090 GN=Cenph PE=1 SV=1 - [CENPH_MOUSE]	1	4.35612e+06	3.92933e+06	1.10861	0	2.49	1	1	0	2.49	1	1														1.10861	1	4.35612e+06
P86448	Tripartite motif-containing protein 43B OS=Mus musculus OX=10090 GN=Trim43b PE=2 SV=1 - [TR43B_MOUSE]													1	1	2.22777e+07	2.01016e+07	1.10826	0	1.35	1	1	0	1.35	1	1	1.10826	1	2.22777e+07
P97351	40S ribosomal protein S3a OS=Mus musculus OX=10090 GN=Rps3a PE=1 SV=3 - [RS3A_MOUSE]	17	1.95937e+08	1.48936e+08	1.31558	45.9917	48.86	15	20	47.1243	55.68	16	23	14	14	104426716	1.16236e+08	0.898401	17.5847	33.33	10	11	22.9447	51.89	13	14	1.10699	12.5	1.50182e+08
Q6PGB8	Probable global transcription activator SNF2L1 OS=Mus musculus OX=10090 GN=Smarca1 PE=1 SV=1 - [SMCA1_MOUSE]	1	8.62261e+07	7.80424e+07	1.10486	26.7361	9.46	12	14	26.1715	8.8	11	13														1.10486	12	8.62261e+07
Q61464	Zinc finger protein 638 OS=Mus musculus OX=10090 GN=Znf638 PE=1 SV=2 - [ZN638_MOUSE]	6	3.25691e+06	2.96403e+06	1.09881	9.89182	2.5	4	4	7.56032	2.14	3	3														1.09881	4	3.25691e+06
Q61818	Retinoic acid-induced protein 1 OS=Mus musculus OX=10090 GN=Rai1 PE=1 SV=3 - [RAI1_MOUSE]	5	2.97858e+06	2.71258e+06	1.09806	7.63017	1.91	3	3	7.9706	2.33	3	3														1.09806	3	2.97858e+06
Q8R124	Kelch-like protein 36 OS=Mus musculus OX=10090 GN=Klhl36 PE=1 SV=1 - [KLH36_MOUSE]	8	1.8552e+07	1.69554e+07	1.09416	16.4885	12.4	6	6	15.4328	14.19	7	7	3	3	1.05643e+07	0		5.22725	5.06	2	2	2.58901	1.79	1	1	1.09416	4	1.45582e+07
Q9CXW4	60S ribosomal protein L11 OS=Mus musculus OX=10090 GN=Rpl11 PE=1 SV=4 - [RL11_MOUSE]	6	1.15741e+08	1.00576e+08	1.15079	18.2481	33.15	5	7	13.5515	36.52	5	5	5	5	1.26984e+08	1.22703e+08	1.03488	9.54551	23.03	4	4	9.18147	23.6	4	4	1.09284	4.5	1.21362e+08
Q91XU3	Phosphatidylinositol 5-phosphate 4-kinase type-2 gamma OS=Mus musculus OX=10090 GN=Pip4k2c PE=1 SV=1 - [PI42C_MOUSE]	8	1.79225e+07	2.9922e+07	0.598976	10.9439	11.88	5	5	17.6187	20.9	6	6	6	6	8.97182e+07	5.65722e+07	1.58591	14.9494	16.86	5	6	13.1428	14.73	4	5	1.09244	5	5.38204e+07
Q05920	Pyruvate carboxylase, mitochondrial OS=Mus musculus OX=10090 GN=Pc PE=1 SV=1 - [PYC_MOUSE]	75	4.22543e+09	4.79314e+09	0.881559	761.531	65.2	71	299	751.276	66.89	69	321	87	87	2.12107e+10	1.62796e+10	1.30291	1557.06	69.86	75	590	1482.76	74.19	85	577	1.09223	73	1.27181e+10
P62242	40S ribosomal protein S8 OS=Mus musculus OX=10090 GN=Rps8 PE=1 SV=2 - [RS8_MOUSE]	12	5.56504e+08	6.05837e+08	0.918571	46.1732	51.92	11	16	59.9846	51.44	11	23	16	16	4.28952e+09	3.39094e+09	1.265	120.156	51.92	12	43	135.088	60.1	16	49	1.09178	11.5	2.42301e+09
P48962	ADP/ATP translocase 1 OS=Mus musculus OX=10090 GN=Slc25a4 PE=1 SV=4 - [ADT1_MOUSE]	2	5.18114e+07	5.86792e+07	0.88296	5.97585	17.11	5	5	10.233	23.49	7	7	2	13	2.78107e+08	2.14946e+08	1.29385	33.6138	45.64	12	15	25.5318	31.21	9	13	1.0884	8.5	1.64959e+08
P51881	ADP/ATP translocase 2 OS=Mus musculus OX=10090 GN=Slc25a5 PE=1 SV=3 - [ADT2_MOUSE]	3	5.18024e+07	5.86792e+07	0.882806	6.35189	20.47	6	6	14.1474	31.21	9	9	5	15	2.78107e+08	2.14946e+08	1.29385	39.1537	53.36	14	19	34.6215	46.31	13	20	1.08833	10	1.64955e+08
Q8BZ21	Histone acetyltransferase KAT6A OS=Mus musculus OX=10090 GN=Kat6a PE=1 SV=2 - [KAT6A_MOUSE]	25	3.34483e+07	3.07608e+07	1.08737	49.5259	13.68	20	21	58.6878	17.27	23	23														1.08737	20	3.34483e+07
P62874	Guanine nucleotide-binding protein G(I)/G(S)/G(T) subunit beta-1 OS=Mus musculus OX=10090 GN=Gnb1 PE=1 SV=3 - [GBB1_MOUSE]	4	1.42891e+07	0		13.6857	29.12	4	4					3	3	1.11825e+07	1.029e+07	1.08674	3.97837	7.06	1	1	4.22037	5.88	2	2	1.08674	2.5	1.27358e+07
O35613	Death domain-associated protein 6 OS=Mus musculus OX=10090 GN=Daxx PE=1 SV=1 - [DAXX_MOUSE]	14	7.35101e+07	6.81045e+07	1.07937	31.0969	27.2	13	13	33.0427	25.71	12	12														1.07937	13	7.35101e+07
Q91WB4	Pleckstrin homology domain-containing family F member 2 OS=Mus musculus OX=10090 GN=Plekhf2 PE=1 SV=1 - [PKHF2_MOUSE]	7	1.04284e+07	9.80933e+06	1.06311	13.275	29.72	4	4	9.0485	23.69	5	5	7	7	6.99894e+07	6.40474e+07	1.09277	20.6312	32.53	6	7	17.3323	28.11	5	6	1.07794	5	4.02089e+07
P10126	Elongation factor 1-alpha 1 OS=Mus musculus OX=10090 GN=Eef1a1 PE=1 SV=3 - [EF1A1_MOUSE]	4	5.72658e+06	5.32978e+06	1.07445	9.82111	13.64	4	4	4.65254	4.98	2	2	8	8	6.73313e+07	6.23788e+07	1.07939	11.4262	18.83	5	5	11.7127	17.1	6	6	1.07692	4.5	3.65289e+07
P47911	60S ribosomal protein L6 OS=Mus musculus OX=10090 GN=Rpl6 PE=1 SV=3 - [RL6_MOUSE]	4	8.67614e+06	1.38971e+07	0.624314	11.2834	14.19	3	4	8.6352	11.49	3	4	12	12	1.37772e+08	9.03136e+07	1.52549	20.2513	33.78	10	10	16.8372	25.34	7	8	1.0749	6.5	7.32242e+07
Q8BXK8	Arf-GAP with GTPase, ANK repeat and PH domain-containing protein 1 OS=Mus musculus OX=10090 GN=Agap1 PE=1 SV=1 - [AGAP1_MOUSE]	14	4.30811e+07	4.02232e+07	1.07105	38.36	19.72	13	15	28.0757	13.65	9	11														1.07105	13	4.30811e+07
P62855	40S ribosomal protein S26 OS=Mus musculus OX=10090 GN=Rps26 PE=1 SV=3 - [RS26_MOUSE]	5	3.62363e+08	3.98381e+08	0.909588	10.5196	40	4	5	5.64341	31.3	3	3	5	5	1.65653e+08	1.34752e+08	1.22931	8.51595	50.43	5	5	13.9604	50.43	5	7	1.06945	4.5	2.64008e+08
Q9R1B9	Slit homolog 2 protein OS=Mus musculus OX=10090 GN=Slit2 PE=2 SV=2 - [SLIT2_MOUSE]	25	2.77036e+07	3.20129e+07	0.865388	43.5213	14.14	16	16	61.8981	20.64	23	25	6	6	1.63544e+07	1.29203e+07	1.2658	11.4417	4.67	6	6	0	0.66	1	1	1.06559	11	2.2029e+07
Q99MY8	Histone-lysine N-methyltransferase ASH1L OS=Mus musculus OX=10090 GN=Ash1l PE=1 SV=3 - [ASH1L_MOUSE]	17	9.08568e+06	8.52906e+06	1.06526	15.7773	4.02	9	9	36.6501	7.47	15	15														1.06526	9	9.08568e+06
Q9CPR4	60S ribosomal protein L17 OS=Mus musculus OX=10090 GN=Rpl17 PE=1 SV=3 - [RL17_MOUSE]	11	4.94602e+08	4.99884e+08	0.989435	42.5039	51.09	10	18	44.2857	54.89	11	20	16	16	1.86788e+09	1.64029e+09	1.13875	76.264	55.43	11	30	89.1917	58.7	16	35	1.06409	10.5	1.18124e+09
A3KFM7	Chromodomain-helicase-DNA-binding protein 6 OS=Mus musculus OX=10090 GN=Chd6 PE=1 SV=1 - [CHD6_MOUSE]	18	3.30051e+07	3.11828e+07	1.05844	55.5758	10.96	19	20	32.29	6.2	12	12														1.05844	19	3.30051e+07
P62751	60S ribosomal protein L23a OS=Mus musculus OX=10090 GN=Rpl23a PE=1 SV=1 - [RL23A_MOUSE]	7	1.35669e+08	1.31771e+08	1.02958	22.4123	42.31	7	10	24.9584	42.31	6	12	15	15	1.04429e+09	9.63008e+08	1.08441	63.0965	55.77	13	26	63.8922	56.41	14	30	1.057	10	5.89982e+08
Q6ZWV3	60S ribosomal protein L10 OS=Mus musculus OX=10090 GN=Rpl10 PE=1 SV=3 - [RL10_MOUSE]	12	3.6212e+08	3.74216e+08	0.967675	35.0581	48.6	11	18	32.5262	48.6	10	17	14	14	5.7957e+08	5.07764e+08	1.14142	43.7884	48.13	12	20	40.0003	50	12	19	1.05455	11.5	4.70845e+08
A6H619	PHD and RING finger domain-containing protein 1 OS=Mus musculus OX=10090 GN=Phrf1 PE=1 SV=2 - [PHRF1_MOUSE]	9	9.10484e+07	8.64134e+07	1.05364	16.7464	4.58	7	8	25.6788	6.54	9	10														1.05364	7	9.10484e+07
Q5SWU9	Acetyl-CoA carboxylase 1 OS=Mus musculus OX=10090 GN=Acaca PE=1 SV=1 - [ACACA_MOUSE]	139	3.01189e+09	3.38524e+09	0.889712	1265.03	70.41	153	479	1376.8	70.23	144	524	162	186	1.17316e+10	9.65645e+09	1.2149	2460.35	73.82	160	900	2399.74	74.88	178	878	1.05231	156.5	7.37176e+09
E9Q5K9	YTH domain-containing protein 1 OS=Mus musculus OX=10090 GN=Ythdc1 PE=1 SV=2 - [YTDC1_MOUSE]	7	1.34115e+07	1.27482e+07	1.05204	12.5284	9.38	6	6	11.0702	9.1	6	6														1.05204	6	1.34115e+07
Q9D1R9	60S ribosomal protein L34 OS=Mus musculus OX=10090 GN=Rpl34 PE=1 SV=2 - [RL34_MOUSE]	6	5.05978e+07	7.6492e+07	0.661478	2.20639	13.68	2	2	13.7993	36.75	6	7	7	7	1.29254e+09	8.96664e+08	1.4415	23.0727	37.61	7	12	25.6513	37.61	7	13	1.05149	4.5	6.7157e+08
P62754	40S ribosomal protein S6 OS=Mus musculus OX=10090 GN=Rps6 PE=1 SV=1 - [RS6_MOUSE]	14	4.23158e+08	5.2466e+08	0.806537	64.1484	40.96	12	23	67.0075	41.77	14	29	23	23	3.11182e+09	2.42673e+09	1.28231	144.879	49.4	18	54	156.734	53.41	22	65	1.04442	15	1.76749e+09
P43277	Histone H1.3 OS=Mus musculus OX=10090 GN=H1-3 PE=1 SV=2 - [H13_MOUSE]	1	2.22104e+09	2.12716e+09	1.04413	77.1964	37.1	13	43	86.6309	38.01	13	43														1.04413	13	2.22104e+09
P47963	60S ribosomal protein L13 OS=Mus musculus OX=10090 GN=Rpl13 PE=1 SV=3 - [RL13_MOUSE]	12	4.30565e+08	4.84407e+08	0.88885	37.567	42.18	10	19	23.9852	35.55	9	17	13	13	1.8767e+09	1.56806e+09	1.19683	32.9408	40.76	10	26	65.1897	50.24	13	31	1.04284	10	1.15363e+09
P62908	40S ribosomal protein S3 OS=Mus musculus OX=10090 GN=Rps3 PE=1 SV=1 - [RS3_MOUSE]	4	4.9957e+06	4.81345e+06	1.03786	3.80124	7.41	2	2	8.84612	17.7	4	4	2	2	2.09886e+07	0		5.68199	12.35	2	2					1.03786	2	1.29921e+07
Q6A4J8	Ubiquitin carboxyl-terminal hydrolase 7 OS=Mus musculus OX=10090 GN=Usp7 PE=1 SV=1 - [UBP7_MOUSE]	12	7.14565e+06	6.44945e+06	1.10795	11.8478	6.26	6	6	20.3981	11.33	10	10	2	2	1.38179e+06	1.42827e+06	0.967458	0	1.27	1	1	2.42023	1.18	1	1	1.0377	3.5	4.26372e+06
Q5SUF2	Luc7-like protein 3 OS=Mus musculus OX=10090 GN=Luc7l3 PE=1 SV=1 - [LC7L3_MOUSE]	9	2.77369e+07	2.67674e+07	1.03622	21.043	17.13	7	8	12.1956	14.12	6	6														1.03622	7	2.77369e+07
Q99ME9	Nucleolar GTP-binding protein 1 OS=Mus musculus OX=10090 GN=Gtpbp4 PE=1 SV=3 - [NOG1_MOUSE]	27	1.43333e+08	1.70028e+08	0.842997	75.8615	41.17	21	31	72.4688	45.43	24	31	17	17	1.13327e+08	9.24168e+07	1.22627	40.6475	22.4	13	17	35.2714	26.34	16	19	1.03463	17	1.2833e+08
E9Q4Z2	Acetyl-CoA carboxylase 2 OS=Mus musculus OX=10090 GN=Acacb PE=1 SV=1 - [ACACB_MOUSE]	42	2.38132e+09	2.89585e+09	0.822321	252.109	24.02	49	101	254.211	24.47	50	104	62	86	1.07705e+10	8.7069e+09	1.237	510.085	37.54	72	189	478.673	37.75	72	172	1.02966	60.5	6.57588e+09
Q7TPV4	Myb-binding protein 1A OS=Mus musculus OX=10090 GN=Mybbp1a PE=1 SV=2 - [MBB1A_MOUSE]	13	1.19898e+07	1.0115e+07	1.18536	20.2527	9.23	8	8	24.9799	11.09	11	11	3	3	1.4184e+06	1.6317e+06	0.869282	4.0375	1.79	2	2	7.52308	2.98	3	3	1.02732	5	6.70412e+06
Q8BP67	60S ribosomal protein L24 OS=Mus musculus OX=10090 GN=Rpl24 PE=1 SV=2 - [RL24_MOUSE]	10	7.68699e+08	8.54743e+08	0.899334	26.7224	37.58	7	11	34.4516	42.68	10	16	9	9	2.55457e+09	2.21735e+09	1.15208	37.976	30.57	5	16	50.3122	39.49	9	25	1.02571	6	1.66163e+09
Q91V61	Sideroflexin-3 OS=Mus musculus OX=10090 GN=Sfxn3 PE=1 SV=1 - [SFXN3_MOUSE]													2	2	4.34284e+06	4.23966e+06	1.02434	6.34569	15.26	2	2	2.9658	9.35	1	1	1.02434	2	4.34284e+06
P61255	60S ribosomal protein L26 OS=Mus musculus OX=10090 GN=Rpl26 PE=1 SV=1 - [RL26_MOUSE]	12	4.28898e+08	4.501e+08	0.952894	28.2143	53.1	12	17	23.1105	44.14	10	14	15	15	5.00532e+09	4.57783e+09	1.09338	56.5329	55.17	14	35	70.1926	55.86	15	41	1.02314	13	2.71711e+09
P35601	Replication factor C subunit 1 OS=Mus musculus OX=10090 GN=Rfc1 PE=1 SV=2 - [RFC1_MOUSE]	17	1.66306e+07	1.62769e+07	1.02173	21.038	11.85	11	11	27.8217	14.85	13	13														1.02173	11	1.66306e+07
Q9CS00	Cactin OS=Mus musculus OX=10090 GN=Cactin PE=1 SV=2 - [CATIN_MOUSE]	2	3.48707e+06	3.41364e+06	1.02151	1.98101	1.17	1	1	2.06659	2.2	1	1														1.02151	1	3.48707e+06
Q9CWL2	Zinc finger protein castor homolog 1 OS=Mus musculus OX=10090 GN=Casz1 PE=1 SV=3 - [CASZ1_MOUSE]	10	1.29168e+07	1.26771e+07	1.01891	22.9346	8.06	8	8	28.1934	8.12	9	10	1	1	3.89375e+06	0		2.36197	1.02	1	1	3.34752	1.02	1	1	1.01891	4.5	8.4053e+06
Q61191	Host cell factor 1 OS=Mus musculus OX=10090 GN=Hcfc1 PE=1 SV=2 - [HCFC1_MOUSE]	4	8.96696e+06	9.76802e+06	0.917992	4.84834	1.37	2	2	7.91648	2.59	4	4	9	9	3.24608e+07	2.94547e+07	1.10206	10.8015	3.18	6	6	12.6228	3.91	6	6	1.01003	4	2.07139e+07
P14873	Microtubule-associated protein 1B OS=Mus musculus OX=10090 GN=Map1b PE=1 SV=2 - [MAP1B_MOUSE]	12	7.10028e+06	7020062	1.01143	31.1733	7.83	10	11	17.8596	5.4	7	7	14	15	2.55321e+07	2.55552e+07	0.999093	30.6299	7.51	10	13	23.5916	6.57	8	9	1.00526	10	1.63162e+07
Q8BKA3	Serine/arginine repetitive matrix protein 4 OS=Mus musculus OX=10090 GN=Srrm4 PE=1 SV=1 - [SRRM4_MOUSE]	7	1.40219e+07	1.40762e+07	0.996142	10.371	9.7	4	4	18.6903	17.27	7	7														0.996142	4	1.40219e+07
Q3UV17	Keratin, type II cytoskeletal 2 oral OS=Mus musculus OX=10090 GN=Krt76 PE=1 SV=1 - [K22O_MOUSE]	1	2.13894e+08	2.54875e+08	0.83921	12.1369	6.06	4	6	8.11241	4.55	3	5	1	6	8.53907e+08	7.44215e+08	1.14739	6.2578	4.55	5	6	9.67295	6.4	5	8	0.993301	4.5	5.339e+08
P56716	Oxygen-regulated protein 1 OS=Mus musculus OX=10090 GN=Rp1 PE=1 SV=2 - [RP1_MOUSE]	10	6.45638e+06	4.31361e+06	1.49675	18.1944	6.06	7	7	12.8823	3.48	6	6	6	6	2.37508e+06	4.89838e+06	0.484869	9.22711	2.63	4	4	4.68764	1.34	3	3	0.990808	5.5	4.41573e+06
Q9CWW7	CXXC-type zinc finger protein 1 OS=Mus musculus OX=10090 GN=Cxxc1 PE=1 SV=1 - [CXXC1_MOUSE]	7	1.27946e+07	1.29253e+07	0.989887	18.2149	13.64	7	7	9.76884	5.61	3	4														0.989887	7	1.27946e+07
F8VPU2	FERM, ARHGEF and pleckstrin domain-containing protein 1 OS=Mus musculus OX=10090 GN=Farp1 PE=1 SV=1 - [FARP1_MOUSE]	2	3.26789e+06	3.34485e+06	0.976992	0	0.76	1	1	0	1.34	1	1														0.976992	1	3.26789e+06
Q9D415	Disks large-associated protein 1 OS=Mus musculus OX=10090 GN=Dlgap1 PE=1 SV=3 - [DLGP1_MOUSE]	1	0	809146	0					0	0.71	1	1	6	6	1.70961e+07	8.75849e+06	1.95194	9.88369	5.54	5	5	2.72863	7.16	3	3	0.975972	5	8.54803e+06
Q6ZWV7	60S ribosomal protein L35 OS=Mus musculus OX=10090 GN=Rpl35 PE=1 SV=1 - [RL35_MOUSE]	4	3.65947e+08	3.95145e+08	0.926108	13.5423	29.27	4	7	9.38883	29.27	4	8	7	7	2.30026e+09	2.25069e+09	1.02202	35.3723	30.08	5	21	49.757	37.4	7	32	0.974066	4.5	1.3331e+09
P47964	60S ribosomal protein L36 OS=Mus musculus OX=10090 GN=Rpl36 PE=1 SV=2 - [RL36_MOUSE]	2	2.77088e+07	3.39026e+07	0.817308	4.18197	18.1	2	2	2.11937	9.52	1	1	1	1	2.94546e+08	2.61298e+08	1.12724	4.5861	9.52	1	2	4.78575	9.52	1	2	0.972275	1.5	1.61128e+08
Q62167	ATP-dependent RNA helicase DDX3X OS=Mus musculus OX=10090 GN=Ddx3x PE=1 SV=3 - [DDX3X_MOUSE]	4	4.31548e+06	4.43989e+06	0.97198	6.80536	5.14	3	3	10.6316	7.1	4	4														0.97198	3	4.31548e+06
Q68FD5	Clathrin heavy chain 1 OS=Mus musculus OX=10090 GN=Cltc PE=1 SV=3 - [CLH1_MOUSE]	1	0	2.13747e+06	0					2.93583	0.9	1	1	10	10	1.99832e+07	1.02868e+07	1.94261	17.5746	5.97	7	7	6.81042	2.69	5	5	0.971306	7	9.99161e+06
P49194	Retinol-binding protein 3 OS=Mus musculus OX=10090 GN=Rbp3 PE=2 SV=3 - [RET3_MOUSE]	9	4.06011e+06	5.23601e+06	0.775421	17.8543	8.18	6	6	21.3451	9.89	8	9	20	20	1.54617e+07	1.3486e+07	1.1465	33.2618	16.61	13	13	39.6882	18.56	15	15	0.960961	9.5	9.76089e+06
P84099	60S ribosomal protein L19 OS=Mus musculus OX=10090 GN=Rpl19 PE=1 SV=1 - [RL19_MOUSE]	8	3.1498e+08	3.8657e+08	0.814809	28.496	26.02	6	11	31.5903	26.02	6	14	11	11	4.41338e+09	4.02763e+09	1.09578	93.1513	26.53	7	30	102.998	36.22	11	37	0.955293	6.5	2.36418e+09
Q0VBL3	RNA-binding protein 15 OS=Mus musculus OX=10090 GN=Rbm15 PE=1 SV=1 - [RBM15_MOUSE]	9	4.77088e+06	5.02244e+06	0.949912	14.2474	9.56	7	7	11.7907	8.42	6	6														0.949912	7	4.77088e+06
Q8CH25	SAFB-like transcription modulator OS=Mus musculus OX=10090 GN=Sltm PE=1 SV=1 - [SLTM_MOUSE]	1	3.77915e+06	3.99095e+06	0.946931	2.82434	1.75	1	1	3.87346	1.75	1	1														0.946931	1	3.77915e+06
Q9Z2H5	Band 4.1-like protein 1 OS=Mus musculus OX=10090 GN=Epb41l1 PE=1 SV=2 - [E41L1_MOUSE]	7	5.84268e+06	1.33069e+07	0.439073	11.4013	7.28	4	4	19.3806	11.49	8	8	5	5	1.39456e+07	9.59695e+06	1.45312	8.73512	5.92	4	4	2.42781	1.14	1	1	0.946099	4	9.89412e+06
Q9ERU3	Zinc finger protein 22 OS=Mus musculus OX=10090 GN=Znf22 PE=1 SV=2 - [ZNF22_MOUSE]	10	1.04481e+08	1.35996e+08	0.768266	12.2992	35.02	8	8	17.7484	40.93	9	11	15	15	9.32472e+08	8.37069e+08	1.11397	50.5135	52.74	13	25	42.6127	51.48	14	22	0.94112	10.5	5.18477e+08
E9Q784	Zinc finger CCCH domain-containing protein 13 OS=Mus musculus OX=10090 GN=Zc3h13 PE=1 SV=1 - [ZC3HD_MOUSE]	42	7.00942e+07	8.44523e+07	0.829986	67.673	18.51	26	30	104.22	22.15	38	44	6	6	4.56104e+06	4.36737e+06	1.04435	7.49203	1.91	3	3	2.25754	1.85	3	3	0.937166	14.5	3.73276e+07
P62267	40S ribosomal protein S23 OS=Mus musculus OX=10090 GN=Rps23 PE=1 SV=3 - [RS23_MOUSE]	6	1.99369e+08	2.41709e+08	0.824834	12.935	29.37	5	6	16.3266	48.25	6	9	8	8	1.62207e+09	1.5549e+09	1.0432	44.8762	48.95	7	19	36.9279	49.65	8	20	0.934017	6	9.10722e+08
O88491	Histone-lysine N-methyltransferase, H3 lysine-36 specific OS=Mus musculus OX=10090 GN=Nsd1 PE=1 SV=1 - [NSD1_MOUSE]	8	5.80041e+06	6.21112e+06	0.933876	16.6029	3.17	6	7	12.5115	2.4	5	5														0.933876	6	5.80041e+06
Q61164	Transcriptional repressor CTCF OS=Mus musculus OX=10090 GN=Ctcf PE=1 SV=2 - [CTCF_MOUSE]	30	2.33389e+08	2.71279e+08	0.860328	95.3731	43.07	21	36	124.919	51.09	29	46	2	2	1.24763e+07	1.24685e+07	1.00062	2.00515	1.63	1	1	0	1.09	1	1	0.930474	11	1.22933e+08
E9PZM4	Chromodomain-helicase-DNA-binding protein 2 OS=Mus musculus OX=10090 GN=Chd2 PE=1 SV=1 - [CHD2_MOUSE]	32	6.06341e+07	6.53073e+07	0.928443	51.0763	13.74	21	22	80.6793	22.39	36	37														0.928443	21	6.06341e+07
P40201	Chromodomain-helicase-DNA-binding protein 1 OS=Mus musculus OX=10090 GN=Chd1 PE=1 SV=3 - [CHD1_MOUSE]	3	5.17402e+07	5.61288e+07	0.921812	12.5647	3.86	6	6	16.5068	5.14	9	9														0.921812	6	5.17402e+07
P62862	40S ribosomal protein S30 OS=Mus musculus OX=10090 GN=Fau PE=1 SV=1 - [RS30_MOUSE]	1	1.46404e+08	1.79188e+08	0.817041	2.52853	16.95	1	1	4.30079	16.95	1	2	3	3	4.12123e+08	4.11756e+08	1.00089	10.4052	20.34	3	5	9.98135	20.34	3	6	0.908966	2	2.79264e+08
F6SEU4	Ras/Rap GTPase-activating protein SynGAP OS=Mus musculus OX=10090 GN=Syngap1 PE=1 SV=2 - [SYGP1_MOUSE]	3	1.94315e+06	2.15202e+06	0.902942	7.11831	2.69	3	3	2.35132	0.75	1	1	2	2	7.22174e+06	0		4.17825	1.27	2	2					0.902942	2.5	4.58244e+06
Q80WS3	rRNA/tRNA 2'-O-methyltransferase fibrillarin-like protein 1 OS=Mus musculus OX=10090 GN=Fbll1 PE=1 SV=1 - [FBLL1_MOUSE]	2	6.4462e+06	7.19493e+06	0.895936	4.47553	7.01	2	2	4.30503	7.01	2	2														0.895936	2	6.4462e+06
P70279	Surfeit locus protein 6 OS=Mus musculus OX=10090 GN=Surf6 PE=1 SV=1 - [SURF6_MOUSE]	13	3.11698e+07	3.63565e+07	0.857339	21.0435	22.25	9	9	18.695	27.04	10	10	16	16	2.27797e+08	2.4399e+08	0.933631	51.109	32.39	15	22	40.3994	31.83	14	19	0.895485	12	1.29483e+08
P23198	Chromobox protein homolog 3 OS=Mus musculus OX=10090 GN=Cbx3 PE=1 SV=2 - [CBX3_MOUSE]	2	833575	934639	0.891869	3.02536	7.65	1	1	1.99293	6.01	1	1														0.891869	1	833575
P14115	60S ribosomal protein L27a OS=Mus musculus OX=10090 GN=Rpl27a PE=1 SV=5 - [RL27A_MOUSE]	7	4.57175e+08	6.1645e+08	0.741625	27.8024	31.76	7	10	28.7069	31.08	6	11	7	7	3.58694e+09	3.50202e+09	1.02425	74.398	31.76	7	29	71.6214	31.08	6	25	0.882938	7	2.02206e+09
Q80UP3	Diacylglycerol kinase zeta OS=Mus musculus OX=10090 GN=Dgkz PE=1 SV=2 - [DGKZ_MOUSE]	3	3.35781e+06	3.80892e+06	0.881564	7.38337	3.44	2	3	8.48902	5.17	3	3														0.881564	2	3.35781e+06
Q70FJ1	A-kinase anchor protein 9 OS=Mus musculus OX=10090 GN=Akap9 PE=1 SV=2 - [AKAP9_MOUSE]	2	446447	509015	0.87708	2.08253	0.32	1	1	2.91906	0.32	1	1	1	1	642589	0		2.38031	0.32	1	1					0.87708	1	544518
Q80TY0	Formin-binding protein 1 OS=Mus musculus OX=10090 GN=Fnbp1 PE=1 SV=2 - [FNBP1_MOUSE]	1	8.89482e+07	1.0287e+08	0.864666	2.17581	1.46	1	1	2.04342	1.46	1	1														0.864666	1	8.89482e+07
Q7TNC4	Putative RNA-binding protein Luc7-like 2 OS=Mus musculus OX=10090 GN=Luc7l2 PE=1 SV=1 - [LC7L2_MOUSE]	6	3.55602e+07	4.13939e+07	0.859067	24.3759	20.66	7	10	19.7578	20.92	7	9														0.859067	7	3.55602e+07
A2AIV2	Protein virilizer homolog OS=Mus musculus OX=10090 GN=Virma PE=1 SV=1 - [VIR_MOUSE]	12	9.40424e+06	1.1083e+07	0.848527	22.7219	5.14	6	7	28.1279	8.39	12	12														0.848527	6	9.40424e+06
Q61136	Serine/threonine-protein kinase PRP4 homolog OS=Mus musculus OX=10090 GN=Prpf4b PE=1 SV=3 - [PRP4B_MOUSE]	30	9.04148e+07	1.06653e+08	0.847744	71.9992	30.69	24	26	74.3924	29.49	26	32														0.847744	24	9.04148e+07
Q5HZG4	Transcription initiation factor TFIID subunit 3 OS=Mus musculus OX=10090 GN=Taf3 PE=1 SV=2 - [TAF3_MOUSE]	10	2.32993e+07	2.75906e+07	0.844465	13.4282	8.91	8	8	14.5009	9.98	8	8														0.844465	8	2.32993e+07
Q8BXR9	Oxysterol-binding protein-related protein 6 OS=Mus musculus OX=10090 GN=Osbpl6 PE=1 SV=1 - [OSBL6_MOUSE]	19	4.13397e+07	4.90281e+07	0.843185	30.1913	16.79	11	11	39.4515	25.03	17	17														0.843185	11	4.13397e+07
Q9R1C6	Diacylglycerol kinase epsilon OS=Mus musculus OX=10090 GN=Dgke PE=1 SV=1 - [DGKE_MOUSE]													1	1	3.37712e+06	4.045e+06	0.834887	2.19054	2.3	1	1	2.43873	2.3	1	1	0.834887	1	3.37712e+06
P63017	Heat shock cognate 71 kDa protein OS=Mus musculus OX=10090 GN=Hspa8 PE=1 SV=1 - [HSP7C_MOUSE]	2	681915	0		5.21462	4.49	2	2					4	4	2.34804e+07	2.81317e+07	0.834659	5.65352	4.49	2	2	8.59055	7.89	4	4	0.834659	2	1.20811e+07
P14733	Lamin-B1 OS=Mus musculus OX=10090 GN=Lmnb1 PE=1 SV=3 - [LMNB1_MOUSE]													1	1	1.42271e+06	1.70518e+06	0.834349	1.89858	1.7	1	1	2.09602	1.7	1	1	0.834349	1	1.42271e+06
Q8BK35	Ribosome biogenesis protein NOP53 OS=Mus musculus OX=10090 GN=Nop53 PE=1 SV=1 - [NOP53_MOUSE]	3	3.08773e+06	3.73038e+06	0.827726	7.33657	8.68	2	2	9.85623	11.36	3	3	2	2	666965	0		4.2131	3.72	2	2					0.827726	2	1.87735e+06
Q8CGP0	Histone H2B type 3-B OS=Mus musculus OX=10090 GN=H2bu1 PE=1 SV=3 - [H2B3B_MOUSE]	2	1.81738e+08	2.20708e+08	0.823432	17.249	46.83	6	10	14.1005	39.68	5	8														0.823432	6	1.81738e+08
Q8VH51	RNA-binding protein 39 OS=Mus musculus OX=10090 GN=Rbm39 PE=1 SV=2 - [RBM39_MOUSE]	3	4.93756e+06	6.00499e+06	0.822243	4.56729	4.72	2	2	7.81635	7.36	3	3														0.822243	2	4.93756e+06
Q9Z103	Activity-dependent neuroprotector homeobox protein OS=Mus musculus OX=10090 GN=Adnp PE=1 SV=2 - [ADNP_MOUSE]	13	1.18243e+07	1.44117e+07	0.820461	24.6778	13.36	10	10	22.7272	12.18	10	10	2	2	3.62145e+06	0		4.89836	2.71	2	2					0.820461	6	7.72285e+06
P83882	60S ribosomal protein L36a OS=Mus musculus OX=10090 GN=Rpl36a PE=3 SV=2 - [RL36A_MOUSE]	3	4.64065e+07	6.88109e+07	0.674405	2.00179	25.47	3	3	6.17197	25.47	3	3	4	4	2.05839e+08	2.14264e+08	0.960683	9.5109	26.42	4	4	11.5283	25.47	3	6	0.817544	3.5	1.26123e+08
P10854	Histone H2B type 1-M OS=Mus musculus OX=10090 GN=H2bc14 PE=1 SV=2 - [H2B1M_MOUSE]	1	1.80405e+08	2.20708e+08	0.817392	14.0869	39.68	5	9	12.2228	39.68	5	8														0.817392	5	1.80405e+08
P70333	Heterogeneous nuclear ribonucleoprotein H2 OS=Mus musculus OX=10090 GN=Hnrnph2 PE=1 SV=1 - [HNRH2_MOUSE]													1	3	1.38038e+07	1.69067e+07	0.816474	2.29008	5.12	2	2	0	2.67	2	3	0.816474	2	1.38038e+07
P62892	60S ribosomal protein L39 OS=Mus musculus OX=10090 GN=Rpl39 PE=1 SV=2 - [RL39_MOUSE]	1	3.76071e+07	49764504	0.755702	2.36602	19.61	1	1	0	19.61	1	1	1	1	4.24404e+08	4.85934e+08	0.873379	4.34523	19.61	1	2	4.82323	19.61	1	2	0.81454	1	2.31006e+08
B2RY56	RNA-binding protein 25 OS=Mus musculus OX=10090 GN=Rbm25 PE=1 SV=2 - [RBM25_MOUSE]	1	3.88498e+06	4.81365e+06	0.807076	3.19839	2.15	1	1	2.35892	2.15	1	1	1	1	7.0753e+06	0		3.15808	2.15	1	1					0.807076	1	5.48014e+06
Q8QZV6	Protein FAM161A OS=Mus musculus OX=10090 GN=Fam161a PE=1 SV=1 - [F161A_MOUSE]	2	8.94131e+06	1.11432e+07	0.8024	4.9977	6.47	2	3	2.01541	2.46	1	2														0.8024	2	8.94131e+06
O54962	Barrier-to-autointegration factor OS=Mus musculus OX=10090 GN=Banf1 PE=1 SV=1 - [BAF_MOUSE]	1	4.13316e+06	5.17945e+06	0.797992	2.05449	13.48	1	1	2.87151	13.48	1	1														0.797992	1	4.13316e+06
Q6A0A9	Constitutive coactivator of PPAR-gamma-like protein 1 OS=Mus musculus OX=10090 GN=FAM120A PE=1 SV=2 - [F120A_MOUSE]	6	3.83151e+06	4.91797e+06	0.779084	10.7005	5.94	4	4	5.71484	3.96	4	4	3	3	6.56744e+06	0		8.32955	4.59	3	3					0.779084	3.5	5.19948e+06
P49312	Heterogeneous nuclear ribonucleoprotein A1 OS=Mus musculus OX=10090 GN=Hnrnpa1 PE=1 SV=2 - [ROA1_MOUSE]													5	5	1.13617e+07	1.46772e+07	0.774105	5.68675	9.69	2	2	11.1898	19.38	4	4	0.774105	2	1.13617e+07
P61514	60S ribosomal protein L37a OS=Mus musculus OX=10090 GN=Rpl37a PE=1 SV=2 - [RL37A_MOUSE]	6	8.76113e+07	1.09996e+08	0.796496	8.73067	41.3	3	3	7.48286	53.26	5	6	8	8	6.6468e+08	9.06747e+08	0.733038	24.7258	59.78	6	13	27.4425	75	8	16	0.764767	4.5	3.76146e+08
P47915	60S ribosomal protein L29 OS=Mus musculus OX=10090 GN=Rpl29 PE=1 SV=2 - [RL29_MOUSE]	4	2.9991e+08	4.89695e+08	0.612442	9.14501	18.75	3	6	6.81196	24.38	4	8	6	6	3.92768e+09	4.29884e+09	0.913661	27.2255	24.38	4	16	31.9643	30	6	20	0.763052	3.5	2.1138e+09
Q8K019	Bcl-2-associated transcription factor 1 OS=Mus musculus OX=10090 GN=Bclaf1 PE=1 SV=2 - [BCLF1_MOUSE]	7	1.30147e+07	1.72174e+07	0.755905	6.15492	4.03	3	3	10.5852	7.83	6	6														0.755905	3	1.30147e+07
P30415	NK-tumor recognition protein OS=Mus musculus OX=10090 GN=Nktr PE=1 SV=4 - [NKTR_MOUSE]	10	7.66288e+06	1.01462e+07	0.755246	6.98223	2.48	3	3	23.2647	10.39	9	9	2	2	1.20428e+07	0		3.53009	2	1	1	0	0.62	1	1	0.755246	2	9.85286e+06
Q9D945	Protein LLP homolog OS=Mus musculus OX=10090 GN=Llph PE=1 SV=1 - [LLPH_MOUSE]													3	3	4.03936e+07	5.41881e+07	0.745434	14.1622	29.23	3	5	8.49019	29.23	2	2	0.745434	3	4.03936e+07
O88737	Protein bassoon OS=Mus musculus OX=10090 GN=Bsn PE=1 SV=4 - [BSN_MOUSE]	24	5.39001e+06	1.29844e+07	0.415113	29.6728	5.1	11	11	50.1401	8.57	20	20	46	47	3.94741e+07	3.68788e+07	1.07037	50.5883	8.63	20	21	90.9672	14.87	37	37	0.742744	15.5	2.2432e+07
O70133	ATP-dependent RNA helicase A OS=Mus musculus OX=10090 GN=Dhx9 PE=1 SV=2 - [DHX9_MOUSE]	1	0	1.32377e+06	0					0	0.87	1	1	2	2	3.14716e+06	2.1361e+06	1.47332	1.89649	1.16	1	1	4.51938	1.74	2	2	0.736661	1	1.57358e+06
Q80YR5	Scaffold attachment factor B2 OS=Mus musculus OX=10090 GN=Safb2 PE=1 SV=2 - [SAFB2_MOUSE]	1	5.4956e+06	7.54126e+06	0.728738	12.212	6.96	4	4	11.2425	5.65	4	4														0.728738	4	5.4956e+06
P20357	Microtubule-associated protein 2 OS=Mus musculus OX=10090 GN=Map2 PE=1 SV=2 - [MTAP2_MOUSE]	8	1.52671e+06	2.26727e+06	0.673371	6.32723	1.75	2	2	11.7329	4.05	6	6	4	4	8.59745e+06	1.10783e+07	0.77606	6.58428	2.08	3	3	2.00135	0.55	1	1	0.724716	2.5	5.06208e+06
Q8CFI7	DNA-directed RNA polymerase II subunit RPB2 OS=Mus musculus OX=10090 GN=Polr2b PE=1 SV=2 - [RPB2_MOUSE]	25	2.11404e+07	2.92686e+07	0.72229	38.1996	16.95	14	16	46.166	22.74	20	21	1	1	0	0						4.46196	2.21	1	1	0.72229	14	1.05702e+07
Q99PV0	Pre-mRNA-processing-splicing factor 8 OS=Mus musculus OX=10090 GN=Prpf8 PE=1 SV=2 - [PRP8_MOUSE]	2	2.02337e+06	2.85241e+06	0.709353	4.34319	0.99	2	2	2.04179	0.34	1	1														0.709353	2	2.02337e+06
Q91VS8	FERM, ARHGEF and pleckstrin domain-containing protein 2 OS=Mus musculus OX=10090 GN=Farp2 PE=1 SV=2 - [FARP2_MOUSE]	20	3.93297e+07	2.78961e+07	1.40986	41.3841	23.19	14	14	41.8624	23.66	18	18	1	1	0	2.66178e+06	0					2.38589	0.94	1	1	0.704932	14	1.96648e+07
Q6P5B0	RRP12-like protein OS=Mus musculus OX=10090 GN=Rrp12 PE=1 SV=1 - [RRP12_MOUSE]	27	2.01423e+07	2.88302e+07	0.698652	51.7878	21.47	17	19	50.9442	23.17	19	22	1	1	396166	0		0	1	1	1					0.698652	9	1.02692e+07
Q497I4	Keratin, type I cuticular Ha5 OS=Mus musculus OX=10090 GN=Krt35 PE=1 SV=1 - [KRT35_MOUSE]													1	2	6.36843e+08	9.16223e+08	0.695074	4.34785	4.18	2	2	1.99056	1.54	1	1	0.695074	2	6.36843e+08
Q8BVE8	Histone-lysine N-methyltransferase NSD2 OS=Mus musculus OX=10090 GN=Nsd2 PE=1 SV=2 - [NSD2_MOUSE]	7	3.7402e+06	5.50149e+06	0.679852	10.1905	4.03	4	4	10.4076	4.62	5	5														0.679852	4	3.7402e+06
Q99LH1	Nucleolar GTP-binding protein 2 OS=Mus musculus OX=10090 GN=Gnl2 PE=1 SV=2 - [NOG2_MOUSE]	13	1.81497e+07	3.85845e+07	0.470388	9.83505	9.48	6	6	24.2338	17.72	11	11	6	6	1.79372e+07	2.02479e+07	0.885881	7.74212	7.55	4	4	6.40011	6.18	3	3	0.678134	5	1.80435e+07
Q60I26	ALS2 C-terminal-like protein OS=Mus musculus OX=10090 GN=Als2cl PE=1 SV=1 - [AL2CL_MOUSE]	1	193572846	286137589	0.676503	0	0.74	1	1	0	0.74	1	1														0.676503	1	193572846
Q8CFG0	Extracellular sulfatase Sulf-2 OS=Mus musculus OX=10090 GN=Sulf2 PE=2 SV=2 - [SULF2_MOUSE]	2	4.74999e+06	7067459	0.672093	5.38864	3.54	2	2	1.9025	1.03	1	1														0.672093	2	4.74999e+06
Q8BYK8	Zinc finger CCCH domain-containing protein 6 OS=Mus musculus OX=10090 GN=Zc3h6 PE=2 SV=2 - [ZC3H6_MOUSE]	12	1.4405e+07	2.18277e+07	0.659943	0	1.27	2	2	29.2582	13.34	11	13														0.659943	2	1.4405e+07
Q8VDD5	Myosin-9 OS=Mus musculus OX=10090 GN=Myh9 PE=1 SV=4 - [MYH9_MOUSE]	13	1.86559e+08	2.82865e+08	0.659534	267.023	11.28	10	63	287.203	13.62	12	65	1	1	0	0		2.88695	0.82	1	1					0.659534	5.5	9.32796e+07
Q8BWT1	3-ketoacyl-CoA thiolase, mitochondrial OS=Mus musculus OX=10090 GN=Acaa2 PE=1 SV=3 - [THIM_MOUSE]	6	3.83831e+06	1.31305e+07	0.292321	5.55043	6.05	2	2	14.957	21.16	6	6	11	11	9.85883e+07	9.77804e+07	1.00826	26.029	32.49	9	10	28.2902	39.8	10	10	0.650291	5.5	5.12133e+07
P48193	Protein 4.1 OS=Mus musculus OX=10090 GN=Epb41 PE=1 SV=2 - [EPB41_MOUSE]	8	14463611	2.20464e+07	0.656053	11.9053	10.61	6	6	13.1628	14.1	10	10	2	2	1.02071e+07	1.61639e+07	0.631476	3.06702	4.55	2	2	0	2.91	1	1	0.643765	4	1.23354e+07
Q8CCK0	Core histone macro-H2A.2 OS=Mus musculus OX=10090 GN=Macroh2a2 PE=1 SV=3 - [H2AW_MOUSE]	3	1.04747e+07	8.31579e+06	1.25962	12.7046	19.62	4	4	3.34879	4.03	1	1	1	1	0	4.1437e+06	0					3.02392	5.38	1	1	0.629811	4	5.23737e+06
P97868	E3 ubiquitin-protein ligase RBBP6 OS=Mus musculus OX=10090 GN=Rbbp6 PE=1 SV=5 - [RBBP6_MOUSE]	43	4.8302e+07	6.58477e+07	0.733541	76.4122	21.28	29	32	88.533	23.35	34	38	9	9	2.81311e+06	5.45576e+06	0.515622	6.66439	3.35	5	5	11.9583	2.79	5	5	0.624581	17	2.55576e+07
O70325	Phospholipid hydroperoxide glutathione peroxidase OS=Mus musculus OX=10090 GN=Gpx4 PE=1 SV=4 - [GPX4_MOUSE]	2	8.02422e+06	6.52499e+06	1.22977	1.91555	5.58	1	1	4.07757	9.14	2	2	1	1	0	1.12168e+06	0					2.13808	4.06	1	1	0.614883	1	4.01211e+06
P02301	Histone H3.3C OS=Mus musculus OX=10090 GN=H3-5 PE=3 SV=3 - [H3C_MOUSE]	5	9.34997e+07	7.67351e+07	1.21847	3.71515	19.12	4	4	1.91709	25.74	5	6	4	4	0	1.75233e+08	0	1.86585	5.15	1	1	3.4084	17.65	3	3	0.609237	2.5	4.67499e+07
P63276	40S ribosomal protein S17 OS=Mus musculus OX=10090 GN=Rps17 PE=1 SV=2 - [RS17_MOUSE]	3	7.17154e+06	0		5.91242	35.56	2	2	2.18544	16.3	1	1	4	4	2.44776e+07	4.0238e+07	0.608321	5.58297	25.19	2	2	5.88291	31.11	3	3	0.608321	2	1.58246e+07
Q8CDN6	Thioredoxin-like protein 1 OS=Mus musculus OX=10090 GN=Txnl1 PE=1 SV=3 - [TXNL1_MOUSE]													3	3	9.47633e+06	1.56207e+07	0.606651	1.6751	3.81	1	1	4.87946	12.11	3	3	0.606651	1	9.47633e+06
P06151	L-lactate dehydrogenase A chain OS=Mus musculus OX=10090 GN=Ldha PE=1 SV=3 - [LDHA_MOUSE]													5	5	1.75461e+07	2.916e+07	0.601717	0	2.41	1	1	6.97307	15.36	4	4	0.601717	1	1.75461e+07
P35969	Vascular endothelial growth factor receptor 1 OS=Mus musculus OX=10090 GN=Flt1 PE=1 SV=1 - [VGFR1_MOUSE]	8	7.69157e+06	6.39578e+06	1.2026	5.30978	4.28	4	4	6.19192	3.38	5	5	1	1	0	3.91817e+06	0					0	0.53	1	1	0.601301	4	3.84578e+06
P17182	Alpha-enolase OS=Mus musculus OX=10090 GN=Eno1 PE=1 SV=3 - [ENOA_MOUSE]	9	1.36899e+07	1.37827e+07	0.993267	24.9719	28.34	7	8	19.8144	21.89	7	7	17	17	1.28803e+07	6.1735e+07	0.208638	23.4197	21.2	7	8	41.2087	53.69	16	18	0.600953	7	1.32851e+07
Q9QZQ8	Core histone macro-H2A.1 OS=Mus musculus OX=10090 GN=Macroh2a1 PE=1 SV=3 - [H2AY_MOUSE]	6	5.09144e+07	4.29238e+07	1.18616	18.6973	29.57	7	8	10.9689	16.67	3	4	1	1	0	7.68444e+06	0					1.84996	2.42	1	1	0.593078	7	2.54572e+07
Q8R1M2	Histone H2A.J OS=Mus musculus OX=10090 GN=H2aj PE=1 SV=1 - [H2AJ_MOUSE]	5	2.80387e+07	4.72926e+07	0.592877	8.03593	42.64	3	3	18.9752	48.06	4	6														0.592877	3	2.80387e+07
Q9R1C7	Pre-mRNA-processing factor 40 homolog A OS=Mus musculus OX=10090 GN=Prpf40a PE=1 SV=1 - [PR40A_MOUSE]	5	1.82614e+07	1.5894e+07	1.14895	13.9923	7.35	5	5	8.33583	5.46	4	4	1	1	0	466060	0					2.45937	1.26	1	1	0.574475	5	9.1307e+06
P63089	Pleiotrophin OS=Mus musculus OX=10090 GN=Ptn PE=1 SV=1 - [PTN_MOUSE]													1	1	4.34949e+06	7.89835e+06	0.550684	0	6.55	1	1	0	6.55	1	1	0.550684	1	4.34949e+06
P20152	Vimentin OS=Mus musculus OX=10090 GN=Vim PE=1 SV=3 - [VIME_MOUSE]	2	2.08066e+06	3.01625e+06	0.689815	4.82307	7.08	2	2	4.10549	4.08	1	1	5	5	8.12986e+06	1.98301e+07	0.409975	5.89608	5.15	2	2	15.3409	11.8	5	6	0.549895	2	5.10526e+06
Q9CX11	rRNA-processing protein UTP23 homolog OS=Mus musculus OX=10090 GN=Utp23 PE=2 SV=1 - [UTP23_MOUSE]	2	0	2.58913e+06	0					2.42401	10.04	2	2	5	5	7.04877e+07	6.54897e+07	1.07632	11.1461	18.88	3	4	13.6657	23.69	4	5	0.538158	3	3.52438e+07
Q3THE2	Myosin regulatory light chain 12B OS=Mus musculus OX=10090 GN=Myl12b PE=1 SV=2 - [ML12B_MOUSE]	1	287930687	556573342	0.517327	50.4985	11.63	1	15	66.6662	11.63	1	19														0.517327	1	287930687
P10853	Histone H2B type 1-F/J/L OS=Mus musculus OX=10090 GN=H2bc7 PE=1 SV=2 - [H2B1F_MOUSE]													5	5	2.64435e+08	5.19188e+08	0.509324	9.60824	40.48	5	5	18.7383	40.48	5	9	0.509324	5	2.64435e+08
Q8BZH4	Pogo transposable element with ZNF domain OS=Mus musculus OX=10090 GN=Pogz PE=1 SV=2 - [POGZ_MOUSE]	3	878492	1.73017e+06	0.50775	5.3559	2.7	2	2	9.81983	3.76	3	3														0.50775	2	878492
P55200	Histone-lysine N-methyltransferase 2A OS=Mus musculus OX=10090 GN=Kmt2a PE=1 SV=3 - [KMT2A_MOUSE]	71	7.66062e+07	7.7909e+07	0.983278	154.44	19.11	54	61	143.164	20.1	53	60	1	1	0	490993	0					2.15043	0.33	1	1	0.491639	54	3.83031e+07
Q6ZPV2	Chromatin-remodeling ATPase INO80 OS=Mus musculus OX=10090 GN=Ino80 PE=1 SV=2 - [INO80_MOUSE]	9	5.45926e+06	1.11837e+07	0.488145	7.77418	2.69	3	3	16.3827	8.34	8	8														0.488145	3	5.45926e+06
Q9CR62	Mitochondrial 2-oxoglutarate/malate carrier protein OS=Mus musculus OX=10090 GN=Slc25a11 PE=1 SV=3 - [M2OM_MOUSE]													3	3	2.64113e+06	5.4278e+06	0.486593	0	3.18	1	1	6.89618	11.15	3	3	0.486593	1	2.64113e+06
Q5U4C3	Splicing factor, arginine/serine-rich 19 OS=Mus musculus OX=10090 GN=Scaf1 PE=1 SV=1 - [SFR19_MOUSE]	46	2.85006e+08	296445143	0.961411	159.125	37.18	38	59	174.534	42.2	44	71	1	1	0	2.30097e+06	0					1.78561	0.8	1	1	0.480705	38	1.42503e+08
Q6PDQ2	Chromodomain-helicase-DNA-binding protein 4 OS=Mus musculus OX=10090 GN=Chd4 PE=1 SV=1 - [CHD4_MOUSE]	9	1.44907e+07	3.08364e+07	0.469921	21.9777	6.63	8	8	32.482	9.4	13	13														0.469921	8	1.44907e+07
G5E8K5	Ankyrin-3 OS=Mus musculus OX=10090 GN=Ank3 PE=1 SV=1 - [ANK3_MOUSE]	4	0	5.9886e+06	0	2.75092	0.87	1	1	11.7761	3.11	4	4	5	6	9.00485e+06	9.59247e+06	0.938741	9.29261	2.75	4	4	11.9244	3.31	5	5	0.469371	2.5	4.50242e+06
A2A8L1	Chromodomain-helicase-DNA-binding protein 5 OS=Mus musculus OX=10090 GN=Chd5 PE=1 SV=1 - [CHD5_MOUSE]	3	1.36823e+07	3.08364e+07	0.443707	15.2403	4.68	6	6	19.4081	4.83	8	8														0.443707	6	1.36823e+07
Q9D0F4	NF-kappa-B-activating protein OS=Mus musculus OX=10090 GN=Nkap PE=2 SV=1 - [NKAP_MOUSE]	7	1.10656e+07	2.50489e+07	0.44176	7.96325	11.81	3	3	21.0375	19.52	7	8														0.44176	3	1.10656e+07
P62852	40S ribosomal protein S25 OS=Mus musculus OX=10090 GN=Rps25 PE=1 SV=1 - [RS25_MOUSE]	4	2.41651e+07	2.74589e+07	0.880045	6.90052	15.2	2	3	7.33242	28	4	4	1	1	0	14910143	0					1.91841	8	1	1	0.440023	2	1.20825e+07
Q9JMC8	Band 4.1-like protein 4B OS=Mus musculus OX=10090 GN=Epb41l4b PE=1 SV=2 - [E41LB_MOUSE]	3	1.02827e+07	2.39624e+07	0.429117	5.35468	6.26	3	3	3.80985	3.42	2	2														0.429117	3	1.02827e+07
E9Q7G0	Nuclear mitotic apparatus protein 1 OS=Mus musculus OX=10090 GN=Numa1 PE=1 SV=1 - [NUMA1_MOUSE]	99	7.79406e+07	9.14076e+07	0.85267	240.484	43.55	81	93	218.703	44.03	77	87	2	2	0	1.14076e+06	0					3.49164	0.81	2	2	0.426335	81	3.89703e+07
Q61493	DNA polymerase zeta catalytic subunit OS=Mus musculus OX=10090 GN=Rev3l PE=1 SV=3 - [REV3L_MOUSE]	2	551810	1.33013e+06	0.414855	0	0.45	1	1	2.30267	0.58	1	1														0.414855	1	551810
Q5DTT2	PH and SEC7 domain-containing protein 1 OS=Mus musculus OX=10090 GN=Psd PE=1 SV=2 - [PSD1_MOUSE]	4	5.33166e+06	6.59571e+06	0.808352	0	0.78	1	1	6.09917	5.27	3	3	1	1	0	4.24142e+06	0					1.82296	0.78	1	1	0.404176	1	2.66583e+06
P17012	Zinc finger X-chromosomal protein OS=Mus musculus OX=10090 GN=Zfx PE=1 SV=2 - [ZFX_MOUSE]	7	4.31079e+07	5.35782e+07	0.804579	14.2893	10.64	5	5	18.9402	17.15	7	8	1	1	0	455439	0					0	1.13	1	1	0.40229	5	2.15539e+07
O88569	Heterogeneous nuclear ribonucleoproteins A2/B1 OS=Mus musculus OX=10090 GN=Hnrnpa2b1 PE=1 SV=2 - [ROA2_MOUSE]	1	0	0						3.19289	4.53	1	1	3	3	6.23379e+06	1.55085e+07	0.401958	4.36849	9.35	3	3	3.13145	2.83	1	1	0.401958	3	3.11689e+06
O55187	E3 SUMO-protein ligase CBX4 OS=Mus musculus OX=10090 GN=Cbx4 PE=1 SV=2 - [CBX4_MOUSE]	5	709196	1.77347e+06	0.399891	8.97493	10.34	3	3	4.86846	5.08	2	2														0.399891	3	709196
P51410	60S ribosomal protein L9 OS=Mus musculus OX=10090 GN=Rpl9 PE=2 SV=2 - [RL9_MOUSE]	1	2.42438e+06	6.14848e+06	0.394306	4.59257	14.06	1	1	4.06008	14.06	1	1														0.394306	1	2.42438e+06
Q8VDP2	UPF0428 protein CXorf56 homolog OS=Mus musculus OX=10090 PE=1 SV=1 - [CX056_MOUSE]	3	956481	2.49015e+06	0.384106	4.36823	12.16	2	2	1.70839	4.95	1	1														0.384106	2	956481
P52480	Pyruvate kinase PKM OS=Mus musculus OX=10090 GN=Pkm PE=1 SV=4 - [KPYM_MOUSE]	1	5.08809e+06	0		6.56042	4.14	1	2					10	10	1.69219e+07	5.17105e+07	0.327243	11.34	11.3	4	4	32.3288	29.57	10	11	0.327243	2.5	1.1005e+07
Q8BL97	Serine/arginine-rich splicing factor 7 OS=Mus musculus OX=10090 GN=Srsf7 PE=1 SV=1 - [SRSF7_MOUSE]	7	5.03843e+07	8.22137e+07	0.612845	8.96724	14.98	4	4	10.672	24.72	6	7	2	2	0	7.92657e+06	0					2.36648	6.74	2	2	0.306423	4	2.51922e+07
Q8BYK4	Retinol dehydrogenase 12 OS=Mus musculus OX=10090 GN=Rdh12 PE=2 SV=1 - [RDH12_MOUSE]													3	3	3.53527e+06	1.37314e+07	0.257458	0	2.22	1	1	3.46166	4.43	2	2	0.257458	1	3.53527e+06
Q9Z2T6	Keratin, type II cuticular Hb5 OS=Mus musculus OX=10090 GN=Krt85 PE=1 SV=2 - [KRT85_MOUSE]													3	3	4.51985e+07	182592605	0.247537	6.61671	6.31	3	3	2.44786	2.17	1	1	0.247537	3	4.51985e+07
Q61666	Protein HIRA OS=Mus musculus OX=10090 GN=Hira PE=1 SV=3 - [HIRA_MOUSE]	2	274633	1.18327e+06	0.232096	4.71241	3.45	1	3	3.03463	0.99	1	1														0.232096	1	274633
Q04447	Creatine kinase B-type OS=Mus musculus OX=10090 GN=Ckb PE=1 SV=1 - [KCRB_MOUSE]	1	1.29532e+06	0		2.88341	4.2	1	1					3	3	2.77972e+06	1.33313e+07	0.20851	2.39026	4.46	1	1	12.3477	11.55	3	4	0.20851	1	2.03752e+06
Q9ESX4	Nucleolar protein of 40 kDa OS=Mus musculus OX=10090 GN=Zcchc17 PE=1 SV=1 - [NO40_MOUSE]	2	1.79899e+06	1.03836e+07	0.173253	3.29213	5.81	1	1	5.25471	12.03	2	2	2	2	2.63124e+06	1.10861e+07	0.237347	2.2071	4.56	1	1	3.1307	10.79	1	1	0.2053	1	2.21512e+06
Q71LX4	Talin-2 OS=Mus musculus OX=10090 GN=Tln2 PE=1 SV=3 - [TLN2_MOUSE]	1	2.71449e+06	3.38716e+08	0.00801407	2.0611	0.42	1	1	0	0.29	1	1														0.00801407	1	2.71449e+06
A2A3V1	A-kinase anchor protein 17B OS=Mus musculus OX=10090 GN=Akap17b PE=1 SV=2 - [AK17B_MOUSE]	1	0	4.94635e+06	0					2.08916	1.15	1	1														0	#DIV/0!	0
A2A9C3	KICSTOR complex protein SZT2 OS=Mus musculus OX=10090 GN=Szt2 PE=1 SV=1 - [SZT2_MOUSE]													1	1	0	3.64105e+06	0					2.79377	0.61	1	1	0	#DIV/0!	0
A2ADY9	Protein DDI1 homolog 2 OS=Mus musculus OX=10090 GN=Ddi2 PE=1 SV=1 - [DDI2_MOUSE]	1	0	1.13707e+07	0					0	1.5	1	1														0	#DIV/0!	0
A2AEY4	MAP7 domain-containing protein 3 OS=Mus musculus OX=10090 GN=Map7d3 PE=2 SV=1 - [MA7D3_MOUSE]	1	0	1.43429e+07	0					0	1.37	1	1														0	#DIV/0!	0
A2AGL3	Ryanodine receptor 3 OS=Mus musculus OX=10090 GN=Ryr3 PE=1 SV=1 - [RYR3_MOUSE]	1	0	1.42807e+06	0					2.57501	0.45	1	1														0	#DIV/0!	0
B1AQJ2	Ubiquitin carboxyl-terminal hydrolase 36 OS=Mus musculus OX=10090 GN=Usp36 PE=1 SV=1 - [UBP36_MOUSE]	3	0	923494	0					4.68055	3.1	3	3														0	#DIV/0!	0
E5FYH1	Protein TOPAZ1 OS=Mus musculus OX=10090 GN=Topaz1 PE=2 SV=1 - [TOPZ1_MOUSE]	1	0	2.68473e+06	0					0	1.09	1	1														0	#DIV/0!	0
E9Q1P8	Interferon regulatory factor 2-binding protein 2 OS=Mus musculus OX=10090 GN=Irf2bp2 PE=1 SV=1 - [I2BP2_MOUSE]	1	0	9290288	0					2.58941	4.39	1	1														0	#DIV/0!	0
E9Q4F7	Ankyrin repeat domain-containing protein 11 OS=Mus musculus OX=10090 GN=Ankrd11 PE=1 SV=1 - [ANR11_MOUSE]	1	0	1.03982e+06	0					2.33969	0.49	1	1														0	#DIV/0!	0
E9Q4S1	High affinity cAMP-specific and IBMX-insensitive 3',5'-cyclic phosphodiesterase 8B OS=Mus musculus OX=10090 GN=Pde8b PE=1 SV=1 - [PDE8B_MOUSE]													1	1	0	9.8653e+07	0					0	0.69	1	1	0	#DIV/0!	0
E9Q555	E3 ubiquitin-protein ligase RNF213 OS=Mus musculus OX=10090 GN=Rnf213 PE=1 SV=2 - [RN213_MOUSE]	1	0	870691	0					2.86635	0.23	1	1														0	#DIV/0!	0
E9Q7X7	Neurexin-2 OS=Mus musculus OX=10090 GN=Nrxn2 PE=1 SV=1 - [NRX2A_MOUSE]	1	0	6.67519e+06	0					1.9195	0.58	1	1	1	1	0	0						2.49618	1.23	1	1	0	#DIV/0!	0
E9QAM5	Helicase with zinc finger domain 2 OS=Mus musculus OX=10090 GN=Helz2 PE=1 SV=1 - [HELZ2_MOUSE]													1	1	0	12440709	0					2.81753	0.88	1	1	0	#DIV/0!	0
O08999	Latent-transforming growth factor beta-binding protein 2 OS=Mus musculus OX=10090 GN=Ltbp2 PE=1 SV=2 - [LTBP2_MOUSE]	1	0	1.44879e+07	0					2.37041	0.77	1	1														0	#DIV/0!	0
O35304	Vesicular acetylcholine transporter OS=Mus musculus OX=10090 GN=Slc18a3 PE=1 SV=1 - [VACHT_MOUSE]	1	0	645252	0					2.72506	3.96	1	1														0	#DIV/0!	0
O35464	Semaphorin-6A OS=Mus musculus OX=10090 GN=Sema6a PE=1 SV=2 - [SEM6A_MOUSE]													1	1	0	6.26024e+06	0					3.36269	2.42	1	1	0	#DIV/0!	0
O88876	Short-chain dehydrogenase/reductase 3 OS=Mus musculus OX=10090 GN=Dhrs3 PE=1 SV=2 - [DHRS3_MOUSE]	1	0	8.10905e+06	0					3.02039	4.64	1	2														0	#DIV/0!	0
P00520	Tyrosine-protein kinase ABL1 OS=Mus musculus OX=10090 GN=Abl1 PE=1 SV=3 - [ABL1_MOUSE]													1	1	0	79660005	0					2.8138	1.6	1	1	0	#DIV/0!	0
P00920	Carbonic anhydrase 2 OS=Mus musculus OX=10090 GN=Ca2 PE=1 SV=4 - [CAH2_MOUSE]													1	1	0	9.48595e+06	0					5.76717	6.15	1	2	0	#DIV/0!	0
P01632	Ig kappa chain V-I region S107A OS=Mus musculus OX=10090 GN=Igkv7-33 PE=2 SV=1 - [KV1A1_MOUSE]	1	0	1.63224e+06	0					3.12151	14.91	1	1														0	#DIV/0!	0
P02088	Hemoglobin subunit beta-1 OS=Mus musculus OX=10090 GN=Hbb-b1 PE=1 SV=2 - [HBB1_MOUSE]													1	1	0	2.62183e+07	0					3.16651	10.88	1	1	0	#DIV/0!	0
P05063	Fructose-bisphosphate aldolase C OS=Mus musculus OX=10090 GN=Aldoc PE=1 SV=4 - [ALDOC_MOUSE]													1	1	0	15333304	0					3.15493	7.71	1	1	0	#DIV/0!	0
P05202	Aspartate aminotransferase, mitochondrial OS=Mus musculus OX=10090 GN=Got2 PE=1 SV=1 - [AATM_MOUSE]													1	1	0	9.23035e+06	0					4.15809	5.35	1	1	0	#DIV/0!	0
P07724	Albumin OS=Mus musculus OX=10090 GN=Alb PE=1 SV=3 - [ALBU_MOUSE]	1	0	1.90744e+07	0					3.13158	2.14	1	1														0	#DIV/0!	0
P11499	Heat shock protein HSP 90-beta OS=Mus musculus OX=10090 GN=Hsp90ab1 PE=1 SV=3 - [HS90B_MOUSE]													2	2	0	1.67129e+07	0					6.03956	6.22	2	2	0	#DIV/0!	0
P11672	Neutrophil gelatinase-associated lipocalin OS=Mus musculus OX=10090 GN=Lcn2 PE=1 SV=1 - [NGAL_MOUSE]	1	0	1.64347e+08	0					0	4.5	1	1	1	1	0	3.09615e+07	0					2.13277	4.5	1	1	0	#DIV/0!	0
P15105	Glutamine synthetase OS=Mus musculus OX=10090 GN=Glul PE=1 SV=6 - [GLNA_MOUSE]													2	2	0	7.5098e+06	0					1.97362	4.29	2	2	0	#DIV/0!	0
P15499	Peripherin-2 OS=Mus musculus OX=10090 GN=Prph2 PE=1 SV=1 - [PRPH2_MOUSE]													1	1	0	14309502	0					2.50278	3.47	1	1	0	#DIV/0!	0
P17751	Triosephosphate isomerase OS=Mus musculus OX=10090 GN=Tpi1 PE=1 SV=5 - [TPIS_MOUSE]													4	4	0	1.076e+07	0					10.2992	28.92	4	4	0	#DIV/0!	0
P23359	Bone morphogenetic protein 7 OS=Mus musculus OX=10090 GN=Bmp7 PE=1 SV=2 - [BMP7_MOUSE]													1	1	0	3.53506e+07	0					2.28604	3.72	1	1	0	#DIV/0!	0
P30355	Arachidonate 5-lipoxygenase-activating protein OS=Mus musculus OX=10090 GN=Alox5ap PE=1 SV=2 - [AL5AP_MOUSE]	1	0	1.46853e+07	0					2.58419	8.07	1	3														0	#DIV/0!	0
P37040	NADPH--cytochrome P450 reductase OS=Mus musculus OX=10090 GN=Por PE=1 SV=2 - [NCPR_MOUSE]													1	1	0	5.50075e+07	0					2.96717	2.36	1	1	0	#DIV/0!	0
P40142	Transketolase OS=Mus musculus OX=10090 GN=Tkt PE=1 SV=1 - [TKT_MOUSE]													3	3	0	4.40025e+06	0					5.63236	6.42	3	3	0	#DIV/0!	0
P40645	Transcription factor SOX-6 OS=Mus musculus OX=10090 GN=Sox6 PE=1 SV=2 - [SOX6_MOUSE]													1	1	0	1.00451e+06	0					0	0.85	1	1	0	#DIV/0!	0
P41971	ETS domain-containing protein Elk-3 OS=Mus musculus OX=10090 GN=Elk3 PE=2 SV=3 - [ELK3_MOUSE]	1	0	2.69593e+06	0					2.08636	1.71	1	1														0	#DIV/0!	0
P48614	Protein Wnt-10b OS=Mus musculus OX=10090 GN=Wnt10b PE=2 SV=1 - [WN10B_MOUSE]	1	0	2.18014e+07	0					0	7.97	1	1														0	#DIV/0!	0
P51174	Long-chain specific acyl-CoA dehydrogenase, mitochondrial OS=Mus musculus OX=10090 GN=Acadl PE=1 SV=2 - [ACADL_MOUSE]													1	1	0	2.52656e+07	0					0	1.63	1	1	0	#DIV/0!	0
P52633	Signal transducer and transcription activator 6 OS=Mus musculus OX=10090 GN=Stat6 PE=1 SV=2 - [STAT6_MOUSE]	1	0	1.02264e+08	0					0	0.84	1	1														0	#DIV/0!	0
P61027	Ras-related protein Rab-10 OS=Mus musculus OX=10090 GN=Rab10 PE=1 SV=1 - [RAB10_MOUSE]													1	1	0	3.89834e+06	0					1.92486	5.5	1	1	0	#DIV/0!	0
P62270	40S ribosomal protein S18 OS=Mus musculus OX=10090 GN=Rps18 PE=1 SV=3 - [RS18_MOUSE]	1	0	1.21708e+06	0					1.81236	7.24	1	1	1	1	0	2.84345e+07	0					1.64166	3.95	1	1	0	#DIV/0!	0
P62889	60S ribosomal protein L30 OS=Mus musculus OX=10090 GN=Rpl30 PE=1 SV=2 - [RL30_MOUSE]													1	1	0	21689445	0					0	5.22	1	1	0	#DIV/0!	0
P63024	Vesicle-associated membrane protein 3 OS=Mus musculus OX=10090 GN=Vamp3 PE=1 SV=1 - [VAMP3_MOUSE]													1	1	0	11770537	0					3.35835	23.3	1	1	0	#DIV/0!	0
P70227	Inositol 1,4,5-trisphosphate receptor type 3 OS=Mus musculus OX=10090 GN=Itpr3 PE=1 SV=3 - [ITPR3_MOUSE]	1	0	8.31976e+06	0					0	0.3	1	1														0	#DIV/0!	0
P70326	T-box transcription factor TBX5 OS=Mus musculus OX=10090 GN=Tbx5 PE=1 SV=2 - [TBX5_MOUSE]													1	1	0	4.28658e+08	0					0	1.35	1	1	0	#DIV/0!	0
P97306	SH3 and cysteine-rich domain-containing protein OS=Mus musculus OX=10090 GN=Stac PE=1 SV=1 - [STAC_MOUSE]	1	0	350558	0					0	7.2	1	1														0	#DIV/0!	0
P97445	Voltage-dependent P/Q-type calcium channel subunit alpha-1A OS=Mus musculus OX=10090 GN=Cacna1a PE=1 SV=2 - [CAC1A_MOUSE]	2	0	118994	0					7.5431	1.9	2	2														0	#DIV/0!	0
Q01097	Glutamate receptor ionotropic, NMDA 2B OS=Mus musculus OX=10090 GN=Grin2b PE=1 SV=3 - [NMDE2_MOUSE]													1	1	0	7.89078e+06	0					0	1.28	1	1	0	#DIV/0!	0
Q08AU7	Myeloid-associated differentiation marker-like protein 2 OS=Mus musculus OX=10090 GN=Myadml2 PE=2 SV=2 - [MADL2_MOUSE]	1	0	1.39236e+07	0					3.11284	5.86	1	1														0	#DIV/0!	0
Q0KL02	Triple functional domain protein OS=Mus musculus OX=10090 GN=Trio PE=1 SV=3 - [TRIO_MOUSE]													1	1	0	24204915	0					3.05443	0.55	1	1	0	#DIV/0!	0
Q3U0M1	Trafficking protein particle complex subunit 9 OS=Mus musculus OX=10090 GN=Trappc9 PE=1 SV=2 - [TPPC9_MOUSE]													1	1	0	1.23346e+06	0					2.54513	0.87	1	1	0	#DIV/0!	0
Q3V016	Homeodomain-interacting protein kinase 4 OS=Mus musculus OX=10090 GN=Hipk4 PE=1 SV=2 - [HIPK4_MOUSE]													1	1	0	1.82514e+06	0					1.98624	0.97	1	1	0	#DIV/0!	0
Q499E4	Zinc finger protein DZIP1L OS=Mus musculus OX=10090 GN=Dzip1l PE=1 SV=1 - [DZI1L_MOUSE]	1	0	3.65644e+07	0					1.7725	1.03	1	1														0	#DIV/0!	0
Q4V9W2	Protein SREK1IP1 OS=Mus musculus OX=10090 GN=Srek1ip1 PE=1 SV=1 - [SR1IP_MOUSE]													1	1	0	2.22781e+06	0					1.62239	7.84	1	1	0	#DIV/0!	0
Q56A08	G-patch domain and KOW motifs-containing protein OS=Mus musculus OX=10090 GN=Gpkow PE=1 SV=2 - [GPKOW_MOUSE]	1	0	758876	0					4.59241	3.89	1	1														0	#DIV/0!	0
Q5DTU0	Actin filament-associated protein 1-like 2 OS=Mus musculus OX=10090 GN=Afap1l2 PE=1 SV=2 - [AF1L2_MOUSE]	1	0	2.7081e+06	0					1.67261	1.09	1	1														0	#DIV/0!	0
Q5F293	Zinc finger and BTB domain-containing protein 4 OS=Mus musculus OX=10090 GN=Zbtb4 PE=2 SV=1 - [ZBTB4_MOUSE]	2	0	3.89124e+06	0					4.89348	2.95	2	2														0	#DIV/0!	0
Q5SSH7	Zinc finger ZZ-type and EF-hand domain-containing protein 1 OS=Mus musculus OX=10090 GN=Zzef1 PE=1 SV=2 - [ZZEF1_MOUSE]													1	1	0	9.47382e+06	0					3.03864	1.03	1	1	0	#DIV/0!	0
Q5SWP3	NAC-alpha domain-containing protein 1 OS=Mus musculus OX=10090 GN=Nacad PE=1 SV=1 - [NACAD_MOUSE]													2	2	0	53257121	0					3.37396	1.8	2	2	0	#DIV/0!	0
Q60575	Kinesin-like protein KIF1B OS=Mus musculus OX=10090 GN=Kif1b PE=1 SV=2 - [KIF1B_MOUSE]	1	0	0						0	0.39	1	1	1	1	0	31286239	0					0	0.5	1	1	0	#DIV/0!	0
Q60625	Intercellular adhesion molecule 5 OS=Mus musculus OX=10090 GN=Icam5 PE=1 SV=2 - [ICAM5_MOUSE]													1	1	0	7.56277e+06	0					2.68723	1.2	1	1	0	#DIV/0!	0
Q60899	ELAV-like protein 2 OS=Mus musculus OX=10090 GN=Elavl2 PE=1 SV=1 - [ELAV2_MOUSE]	1	0	2.7324e+07	0					2.41537	6.11	1	1														0	#DIV/0!	0
Q60932	Voltage-dependent anion-selective channel protein 1 OS=Mus musculus OX=10090 GN=Vdac1 PE=1 SV=3 - [VDAC1_MOUSE]													1	1	0	1.19074e+07	0					0	2.7	1	1	0	#DIV/0!	0
Q61146	Occludin OS=Mus musculus OX=10090 GN=Ocln PE=1 SV=1 - [OCLN_MOUSE]	1	0	1.81104e+07	0					2.32048	1.34	1	1														0	#DIV/0!	0
Q61288	Serine/threonine-protein kinase receptor R3 OS=Mus musculus OX=10090 GN=Acvrl1 PE=1 SV=2 - [ACVL1_MOUSE]													1	1	0	120664895	0					0	1.39	1	1	0	#DIV/0!	0
Q6DFY8	BMP/retinoic acid-inducible neural-specific protein 2 OS=Mus musculus OX=10090 GN=Brinp2 PE=1 SV=1 - [BRNP2_MOUSE]	1	0	2390045	0					3.39824	2.17	1	1														0	#DIV/0!	0
Q6IFX4	Keratin, type I cytoskeletal 39 OS=Mus musculus OX=10090 GN=Krt39 PE=2 SV=2 - [K1C39_MOUSE]	1	0	1.50714e+07	0					1.95418	1.45	1	1														0	#DIV/0!	0
Q6NS45	Coiled-coil domain-containing protein 66 OS=Mus musculus OX=10090 GN=Ccdc66 PE=1 SV=3 - [CCD66_MOUSE]	1	0	5.42572e+06	0					2.08005	1.18	1	1														0	#DIV/0!	0
Q6NXK2	Zinc finger protein 532 OS=Mus musculus OX=10090 GN=Znf532 PE=1 SV=1 - [ZN532_MOUSE]													1	1	0	2.16444e+07	0					2.04702	1.06	1	1	0	#DIV/0!	0
Q6P3E7	Polyamine deacetylase HDAC10 OS=Mus musculus OX=10090 GN=Hdac10 PE=2 SV=2 - [HDA10_MOUSE]													1	1	0	2.39559e+07	0					2.7174	2.85	1	1	0	#DIV/0!	0
Q6P3Y5	Zinc finger protein 280C OS=Mus musculus OX=10090 GN=Znf280c PE=1 SV=1 - [Z280C_MOUSE]	1	0	153137	0					0	1.62	1	1														0	#DIV/0!	0
Q6PCM1	Lysine-specific demethylase 3A OS=Mus musculus OX=10090 GN=Kdm3a PE=1 SV=1 - [KDM3A_MOUSE]													1	1	0	4.22626e+07	0					2.40952	1.28	1	1	0	#DIV/0!	0
Q6ZPR4	Potassium channel subfamily T member 1 OS=Mus musculus OX=10090 GN=Kcnt1 PE=1 SV=2 - [KCNT1_MOUSE]	1	0	560337	0					2.43544	1.23	1	1														0	#DIV/0!	0
Q6ZQJ5	DNA replication ATP-dependent helicase/nuclease DNA2 OS=Mus musculus OX=10090 GN=Dna2 PE=1 SV=2 - [DNA2_MOUSE]	1	0	2.30849e+07	0					3.6083	1.69	1	1														0	#DIV/0!	0
Q7TNB4	Protein maestro OS=Mus musculus OX=10090 GN=Mro PE=2 SV=1 - [MSTRO_MOUSE]	1	0	4.79039e+06	0					2.82477	7.26	1	1														0	#DIV/0!	0
Q7TSH2	Phosphorylase b kinase regulatory subunit beta OS=Mus musculus OX=10090 GN=Phkb PE=1 SV=1 - [KPBB_MOUSE]	1	0	4.55199e+08	0					1.84368	0.65	1	1														0	#DIV/0!	0
Q80VK6	Rho guanine nucleotide exchange factor 38 OS=Mus musculus OX=10090 GN=Arhgef38 PE=1 SV=2 - [ARH38_MOUSE]													1	1	0	3.9344e+07	0					2.44701	1.69	1	1	0	#DIV/0!	0
Q80XI6	Mitogen-activated protein kinase kinase kinase 11 OS=Mus musculus OX=10090 GN=Map3k11 PE=1 SV=1 - [M3K11_MOUSE]	1	0	508783	0					2.09931	1.18	1	1	1	1	0	29830430	0					2.34237	1.18	1	1	0	#DIV/0!	0
Q80Y83	Dixin OS=Mus musculus OX=10090 GN=Dixdc1 PE=1 SV=1 - [DIXC1_MOUSE]	1	0	4.15262e+06	0					3.14817	2.67	1	1														0	#DIV/0!	0
Q80ZD3	Sodium-independent sulfate anion transporter OS=Mus musculus OX=10090 GN=Slc26a11 PE=2 SV=2 - [S2611_MOUSE]													1	1	0	3.35339e+07	0					3.23936	5.23	1	1	0	#DIV/0!	0
Q811F1	Zinc finger and BTB domain-containing protein 41 OS=Mus musculus OX=10090 GN=Zbtb41 PE=2 SV=4 - [ZBT41_MOUSE]	1	0	543105	0					2.75246	1.32	1	1														0	#DIV/0!	0
Q8BG19	Protein O-mannosyl-transferase TMTC4 OS=Mus musculus OX=10090 GN=Tmtc4 PE=2 SV=1 - [TMTC4_MOUSE]													1	1	0	2.75384e+06	0					1.88893	1.08	1	1	0	#DIV/0!	0
Q8BGT9	Polypeptide N-acetylgalactosaminyltransferase 12 OS=Mus musculus OX=10090 GN=Galnt12 PE=2 SV=1 - [GLT12_MOUSE]													1	1	0	1.1881e+07	0					0	1.91	1	1	0	#DIV/0!	0
Q8BHA9	2-phosphoxylose phosphatase 1 OS=Mus musculus OX=10090 GN=Pxylp1 PE=2 SV=1 - [PXYP1_MOUSE]													1	1	0	7.41301e+08	0					0	2.08	1	1	0	#DIV/0!	0
Q8BIJ6	Isoleucine--tRNA ligase, mitochondrial OS=Mus musculus OX=10090 GN=Iars2 PE=1 SV=1 - [SYIM_MOUSE]													1	1	0	3.75946e+06	0					2.06079	1.09	1	1	0	#DIV/0!	0
Q8BKC5	Importin-5 OS=Mus musculus OX=10090 GN=Ipo5 PE=1 SV=3 - [IPO5_MOUSE]	1	0	2.05643e+07	0					2.39689	1.46	1	1														0	#DIV/0!	0
Q8BKF1	DNA-directed RNA polymerase, mitochondrial OS=Mus musculus OX=10090 GN=Polrmt PE=1 SV=1 - [RPOM_MOUSE]													1	1	0	21816438	0					2.22959	0.75	1	1	0	#DIV/0!	0
Q8BLG0	PHD finger protein 20 OS=Mus musculus OX=10090 GN=Phf20 PE=1 SV=2 - [PHF20_MOUSE]	1	0	4.31859e+06	0					2.9073	1.58	1	1														0	#DIV/0!	0
Q8BMA5	Protein NPAT OS=Mus musculus OX=10090 GN=Npat PE=1 SV=2 - [NPAT_MOUSE]	1	0	201037	0					1.78311	0.56	1	1														0	#DIV/0!	0
Q8BN58	Rho GTPase-activating protein 28 OS=Mus musculus OX=10090 GN=Arhgap28 PE=1 SV=1 - [RHG28_MOUSE]													1	1	0	4.06062e+07	0					2.25809	1.92	1	1	0	#DIV/0!	0
Q8CDI7	Coiled-coil domain-containing protein 150 OS=Mus musculus OX=10090 GN=Ccdc150 PE=2 SV=2 - [CC150_MOUSE]													1	1	0	7.2127e+08	0					0	0.54	1	1	0	#DIV/0!	0
Q8CE50	Sorting nexin-30 OS=Mus musculus OX=10090 GN=Snx30 PE=1 SV=1 - [SNX30_MOUSE]	1	0	4.29987e+07	0					2.19215	2.29	1	1														0	#DIV/0!	0
Q8CG48	Structural maintenance of chromosomes protein 2 OS=Mus musculus OX=10090 GN=Smc2 PE=1 SV=2 - [SMC2_MOUSE]	1	0	1.08678e+06	0					3.04184	2.69	1	1														0	#DIV/0!	0
Q8CI52	Protein Aster-C OS=Mus musculus OX=10090 GN=Gramd1c PE=2 SV=2 - [ASTRC_MOUSE]	1	0	766843	0					0	1.06	1	1														0	#DIV/0!	0
Q8K0B3	Leucine-rich repeat-containing protein 66 OS=Mus musculus OX=10090 GN=Lrrc66 PE=1 SV=1 - [LRC66_MOUSE]	1	0	1.10242e+07	0					2.68839	2.18	1	1														0	#DIV/0!	0
Q8K1N4	Spermatogenesis-associated serine-rich protein 2 OS=Mus musculus OX=10090 GN=Spats2 PE=1 SV=1 - [SPAS2_MOUSE]	1	0	2.84107e+06	0					1.74755	1.83	1	1														0	#DIV/0!	0
Q8R081	Heterogeneous nuclear ribonucleoprotein L OS=Mus musculus OX=10090 GN=Hnrnpl PE=1 SV=2 - [HNRPL_MOUSE]	2	0	2.92559e+06	0					5.40606	4.95	2	2														0	#DIV/0!	0
Q8R087	Beta-1,4-galactosyltransferase 7 OS=Mus musculus OX=10090 GN=B4galt7 PE=2 SV=1 - [B4GT7_MOUSE]													1	1	0	6.34057e+06	0					0	2.14	1	1	0	#DIV/0!	0
Q8R0I0	Angiotensin-converting enzyme 2 OS=Mus musculus OX=10090 GN=Ace2 PE=1 SV=1 - [ACE2_MOUSE]	1	0	599547	0					3.55023	2.86	1	1														0	#DIV/0!	0
Q8R0K4	Coiled-coil domain-containing protein 137 OS=Mus musculus OX=10090 GN=Ccdc137 PE=2 SV=1 - [CC137_MOUSE]	2	0	3.33448e+06	0					6.91067	9.66	2	2														0	#DIV/0!	0
Q8R2U2	Nucleolus and neural progenitor protein OS=Mus musculus OX=10090 GN=Nepro PE=2 SV=1 - [NEPRO_MOUSE]	1	0	1.1495e+06	0					2.36005	1.95	1	1														0	#DIV/0!	0
Q8R429	Sarcoplasmic/endoplasmic reticulum calcium ATPase 1 OS=Mus musculus OX=10090 GN=Atp2a1 PE=1 SV=1 - [AT2A1_MOUSE]													1	1	0	2.35055e+06	0					3.80218	2.31	1	1	0	#DIV/0!	0
Q8R5F8	Epidermal growth factor receptor kinase substrate 8-like protein 1 OS=Mus musculus OX=10090 GN=Eps8l1 PE=1 SV=1 - [ES8L1_MOUSE]													1	1	0	6.19015e+06	0					1.86122	0.98	1	1	0	#DIV/0!	0
Q8VCC8	Rap guanine nucleotide exchange factor 3 OS=Mus musculus OX=10090 GN=Rapgef3 PE=1 SV=2 - [RPGF3_MOUSE]	1	0	2.64857e+07	0					0	0.76	1	1														0	#DIV/0!	0
Q8VDP3	[F-actin]-monooxygenase MICAL1 OS=Mus musculus OX=10090 GN=Mical1 PE=1 SV=1 - [MICA1_MOUSE]													1	1	0	105735131	0					2.25971	1.43	1	1	0	#DIV/0!	0
Q8VHN7	Adhesion G-protein coupled receptor V1 OS=Mus musculus OX=10090 GN=Adgrv1 PE=1 SV=1 - [AGRV1_MOUSE]													1	1	0	8827809	0					0	0.11	1	1	0	#DIV/0!	0
Q91VB2	Calcium/calmodulin-dependent protein kinase type 1G OS=Mus musculus OX=10090 GN=Camk1g PE=1 SV=1 - [KCC1G_MOUSE]													1	1	0	1.27993e+08	0					4.07207	5.66	1	1	0	#DIV/0!	0
Q91W97	Hexokinase HKDC1 OS=Mus musculus OX=10090 GN=Hkdc1 PE=2 SV=1 - [HKDC1_MOUSE]													1	1	0	7.7778e+06	0					2.09066	0.77	1	1	0	#DIV/0!	0
Q91WD2	Transient receptor potential cation channel subfamily V member 6 OS=Mus musculus OX=10090 GN=Trpv6 PE=1 SV=2 - [TRPV6_MOUSE]													1	1	0	1.03381e+07	0					0	2.48	1	1	0	#DIV/0!	0
Q91XD6	Vacuolar protein-sorting-associated protein 36 OS=Mus musculus OX=10090 GN=Vps36 PE=1 SV=1 - [VPS36_MOUSE]	1	0	1.75504e+07	0					2.03746	3.89	1	1														0	#DIV/0!	0
Q91XQ0	Dynein heavy chain 8, axonemal OS=Mus musculus OX=10090 GN=Dnah8 PE=1 SV=2 - [DYH8_MOUSE]													1	1	0	8.88977e+08	0					2.36139	0.3	1	1	0	#DIV/0!	0
Q91ZB0	Alpha-protein kinase 2 OS=Mus musculus OX=10090 GN=Alpk2 PE=2 SV=3 - [ALPK2_MOUSE]	1	0	4.89263e+08	0					3.08506	0.61	1	1														0	#DIV/0!	0
Q91ZD4	Vang-like protein 2 OS=Mus musculus OX=10090 GN=Vangl2 PE=1 SV=3 - [VANG2_MOUSE]													1	1	0	256560	0					2.21704	1.92	1	1	0	#DIV/0!	0
Q921N6	Probable ATP-dependent RNA helicase DDX27 OS=Mus musculus OX=10090 GN=Ddx27 PE=1 SV=3 - [DDX27_MOUSE]	2	0	2.86939e+06	0					3.76403	2.63	2	2														0	#DIV/0!	0
Q922H1	Protein arginine N-methyltransferase 3 OS=Mus musculus OX=10090 GN=Prmt3 PE=1 SV=2 - [ANM3_MOUSE]	1	0	11439184	0					3.29044	4.32	1	1														0	#DIV/0!	0
Q922M7	Ashwin OS=Mus musculus OX=10090 PE=1 SV=1 - [ASHWN_MOUSE]	1	0	4.54697e+07	0					1.65401	3.02	1	1														0	#DIV/0!	0
Q925U4	ER degradation-enhancing alpha-mannosidase-like protein 1 OS=Mus musculus OX=10090 GN=Edem1 PE=1 SV=1 - [EDEM1_MOUSE]													1	1	0	1.18481e+08	0					3.31666	3.22	1	1	0	#DIV/0!	0
Q99JF8	PC4 and SFRS1-interacting protein OS=Mus musculus OX=10090 GN=Psip1 PE=1 SV=1 - [PSIP1_MOUSE]													1	1	0	3.60729e+07	0					0	2.08	1	1	0	#DIV/0!	0
Q99N90	39S ribosomal protein L36, mitochondrial OS=Mus musculus OX=10090 GN=Mrpl36 PE=3 SV=1 - [RM36_MOUSE]													1	1	0	1.69436e+07	0					0	5.88	1	1	0	#DIV/0!	0
Q9CR47	Ribosome biogenesis protein NSA2 homolog OS=Mus musculus OX=10090 GN=Nsa2 PE=2 SV=1 - [NSA2_MOUSE]													2	2	0	1.77971e+06	0					4.11983	11.15	2	2	0	#DIV/0!	0
Q9CY62	E3 ubiquitin-protein ligase RNF181 OS=Mus musculus OX=10090 GN=Rnf181 PE=1 SV=1 - [RN181_MOUSE]	1	0	2.93039e+07	0					1.63528	4.85	1	1														0	#DIV/0!	0
Q9D0R4	Probable ATP-dependent RNA helicase DDX56 OS=Mus musculus OX=10090 GN=Ddx56 PE=2 SV=1 - [DDX56_MOUSE]	1	0	583987	0					2.86561	2.56	1	1														0	#DIV/0!	0
Q9D454	Uncharacterized protein CXorf49 homolog OS=Mus musculus OX=10090 PE=1 SV=1 - [CX049_MOUSE]	1	0	6.25772e+07	0					0	1.75	1	1														0	#DIV/0!	0
Q9D495	Synaptonemal complex central element protein 1 OS=Mus musculus OX=10090 GN=Syce1 PE=1 SV=1 - [SYCE1_MOUSE]	1	0	4.8451e+06	0					0	2.13	1	1														0	#DIV/0!	0
Q9D808	Potassium voltage-gated channel subfamily E member 2 OS=Mus musculus OX=10090 GN=Kcne2 PE=2 SV=2 - [KCNE2_MOUSE]	1	0	1.83903e+06	0					2.26154	8.13	1	1														0	#DIV/0!	0
Q9DB20	ATP synthase subunit O, mitochondrial OS=Mus musculus OX=10090 GN=Atp5po PE=1 SV=1 - [ATPO_MOUSE]													2	2	0	7418055	0					5.43476	11.74	2	2	0	#DIV/0!	0
Q9DBL1	Short/branched chain specific acyl-CoA dehydrogenase, mitochondrial OS=Mus musculus OX=10090 GN=Acadsb PE=1 SV=1 - [ACDSB_MOUSE]													1	1	0	4.5587e+06	0					4.14822	5.09	1	1	0	#DIV/0!	0
Q9EPE9	Manganese-transporting ATPase 13A1 OS=Mus musculus OX=10090 GN=Atp13a1 PE=1 SV=2 - [AT131_MOUSE]	1	0	886072	0					2.75296	1.17	1	1														0	#DIV/0!	0
Q9EQK7	Protein-S-isoprenylcysteine O-methyltransferase OS=Mus musculus OX=10090 GN=Icmt PE=2 SV=2 - [ICMT_MOUSE]	1	0	6.06509e+06	0					3.00147	6.71	1	1														0	#DIV/0!	0
Q9JHW2	Omega-amidase NIT2 OS=Mus musculus OX=10090 GN=Nit2 PE=1 SV=1 - [NIT2_MOUSE]	1	0	1.38681e+08	0					1.76666	5.43	1	1														0	#DIV/0!	0
Q9QWH1	Polyhomeotic-like protein 2 OS=Mus musculus OX=10090 GN=Phc2 PE=1 SV=1 - [PHC2_MOUSE]	1	0	1.60496e+06	0					2.58529	1.88	1	1														0	#DIV/0!	0
Q9QZ05	eIF-2-alpha kinase GCN2 OS=Mus musculus OX=10090 GN=Eif2ak4 PE=1 SV=2 - [E2AK4_MOUSE]													1	1	0	8.04859e+08	0					2.70286	0.61	1	1	0	#DIV/0!	0
Q9QZM2	DNA polymerase subunit gamma-2, mitochondrial OS=Mus musculus OX=10090 GN=Polg2 PE=1 SV=2 - [DPOG2_MOUSE]													1	1	0	1.17125e+06	0					2.05102	1.74	1	1	0	#DIV/0!	0
Q9R020	Zinc finger Ran-binding domain-containing protein 2 OS=Mus musculus OX=10090 GN=Zranb2 PE=1 SV=2 - [ZRAB2_MOUSE]													1	1	0	1.21388e+07	0					2.52855	4.24	1	1	0	#DIV/0!	0
Q9R0M0	Cadherin EGF LAG seven-pass G-type receptor 2 OS=Mus musculus OX=10090 GN=Celsr2 PE=1 SV=3 - [CELR2_MOUSE]	1	0	2.42082e+07	0					1.73957	0.38	1	1														0	#DIV/0!	0
Q9WTI7	Unconventional myosin-Ic OS=Mus musculus OX=10090 GN=Myo1c PE=1 SV=2 - [MYO1C_MOUSE]	1	0	822585	0					4.18132	2.16	1	1														0	#DIV/0!	0
Q9WUJ8	Origin recognition complex subunit 6 OS=Mus musculus OX=10090 GN=Orc6 PE=1 SV=1 - [ORC6_MOUSE]	1	0	5.34461e+06	0					1.64126	2.67	1	1														0	#DIV/0!	0
Q9WV55	Vesicle-associated membrane protein-associated protein A OS=Mus musculus OX=10090 GN=Vapa PE=1 SV=2 - [VAPA_MOUSE]													1	1	0	8.75821e+06	0					0	2.81	1	1	0	#DIV/0!	0
Q9WVM6	Tolloid-like protein 2 OS=Mus musculus OX=10090 GN=Tll2 PE=1 SV=1 - [TLL2_MOUSE]													1	1	0	41677914	0					2.78816	1.98	1	1	0	#DIV/0!	0
Q9WVP6	Poly(A) polymerase beta OS=Mus musculus OX=10090 GN=Papolb PE=1 SV=2 - [PAPOB_MOUSE]													1	1	0	1.66991e+07	0					0	0.94	1	1	0	#DIV/0!	0
Q9Z160	Conserved oligomeric Golgi complex subunit 1 OS=Mus musculus OX=10090 GN=Cog1 PE=1 SV=3 - [COG1_MOUSE]	1	0	2.01075e+07	0					0	1.94	1	1														0	#DIV/0!	0
Q9Z1X9	Cell division control protein 45 homolog OS=Mus musculus OX=10090 GN=Cdc45 PE=1 SV=2 - [CDC45_MOUSE]													1	1	0	9.83781e+06	0					3.04461	3.36	1	1	0	#DIV/0!	0
Q9Z275	Retinaldehyde-binding protein 1 OS=Mus musculus OX=10090 GN=Rlbp1 PE=1 SV=3 - [RLBP1_MOUSE]													1	1	0	4.27518e+06	0					0	2.21	1	1	0	#DIV/0!	0
Q61878	Bone marrow proteoglycan OS=Mus musculus OX=10090 GN=Prg2 PE=1 SV=1 - [PRG2_MOUSE]	1	0	10335048	0					2.1241	5.38	1	1	4	4	4.5071e+08	0		24.5466	30.04	4	8					0	4	2.25355e+08
A2ASS6	Titin OS=Mus musculus OX=10090 GN=Ttn PE=1 SV=1 - [TITIN_MOUSE]	1	0	1.70146e+06	0					1.60042	0.03	1	1	1	3	1.10951e+08	0		4.20574	0.08	3	3					0	3	5.54756e+07
Q9QWI6	SRC kinase signaling inhibitor 1 OS=Mus musculus OX=10090 GN=Srcin1 PE=1 SV=2 - [SRCN1_MOUSE]	1	0	413304	0					1.62674	1.04	1	1	2	2	1.51872e+06	0		3.21797	2.8	2	2					0	2	759359
Q61245	Collagen alpha-1(XI) chain OS=Mus musculus OX=10090 GN=Col11a1 PE=1 SV=2 - [COBA1_MOUSE]	1	7.67931e+06	0		0	0.5	1	1					1	1	0	1.01088e+07	0					1.83589	0.44	1	1	0	1	3.83965e+06
Q7TQG1	Pleckstrin homology domain-containing family A member 6 OS=Mus musculus OX=10090 GN=Plekha6 PE=1 SV=1 - [PKHA6_MOUSE]	1	0	1.99458e+06	0					1.89052	0.77	1	1	1	1	7.4299e+06	0		2.42522	1.02	1	1					0	1	3.71495e+06
Q8BKI2	Trinucleotide repeat-containing gene 6B protein OS=Mus musculus OX=10090 GN=Tnrc6b PE=1 SV=2 - [TNR6B_MOUSE]	1	0	569803	0					1.84614	0.5	1	1	1	1	2.09275e+06	0		2.11244	0.5	1	1					0	1	1.04637e+06
E9Q8I9	Protein furry homolog OS=Mus musculus OX=10090 GN=Fry PE=1 SV=1 - [FRY_MOUSE]	2	0	2.21626e+06	0					6.26723	1.32	2	2	1	1	1.09621e+06	0		1.93304	0.3	1	1					0	1	548103
Q9DA19	Corepressor interacting with RBPJ 1 OS=Mus musculus OX=10090 GN=Cir1 PE=1 SV=2 - [CIR1_MOUSE]	1	0	2.46124e+06	0					2.95392	3.11	1	1	1	1	603334	0		1.78346	1.78	1	1					0	1	301667
P50516	V-type proton ATPase catalytic subunit A OS=Mus musculus OX=10090 GN=Atp6v1a PE=1 SV=2 - [VATA_MOUSE]	1	0	0		3.33729	6.32	1	1					1	1	0	3.65067e+06	0					3.2055	3.89	1	1	0	1	0
P62996	Transformer-2 protein homolog beta OS=Mus musculus OX=10090 GN=Tra2b PE=1 SV=1 - [TRA2B_MOUSE]	2	0	7.59707e+06	0	2.60436	4.86	1	1	5.48551	10.42	2	2														0	1	0
Q61327	Sodium-dependent dopamine transporter OS=Mus musculus OX=10090 GN=Slc6a3 PE=1 SV=2 - [SC6A3_MOUSE]	1	0	9.01867e+08	0	0	1.29	1	2	3.5272	1.29	1	3	1	1	0	0		0	1.29	1	2	1.68836	1.29	1	1	0	1	0
Q8BUH8	Sentrin-specific protease 7 OS=Mus musculus OX=10090 GN=Senp7 PE=1 SV=1 - [SENP7_MOUSE]	2	0	1.29828e+09	0					2.74512	2.7	2	2	2	2	0	3.62653e+08	0	2.23934	1.16	1	1	4.29754	1.74	2	2	0	1	0
Q99P91	Transmembrane glycoprotein NMB OS=Mus musculus OX=10090 GN=Gpnmb PE=1 SV=2 - [GPNMB_MOUSE]	1	0	0		3.32298	3.48	1	1					1	1	0	1.05757e+07	0					2.23924	3.48	1	1	0	1	0
Q9EPT5	Solute carrier organic anion transporter family member 2A1 OS=Mus musculus OX=10090 GN=Slco2a1 PE=1 SV=2 - [SO2A1_MOUSE]	1	0	8.05331e+06	0	1.7847	1.56	1	1	1.93936	1.56	1	1														0	1	0
Q9WTN3	Sterol regulatory element-binding protein 1 OS=Mus musculus OX=10090 GN=Srebf1 PE=1 SV=4 - [SRBP1_MOUSE]	1	0	0		0	0.62	1	2	0	0.62	1	1	2	2	0	23085110	0	0	0.62	1	2	2.06491	1.41	2	3	0	1	0
A0AUV4	Sperm motility kinase Y OS=Mus musculus OX=10090 GN=Gm7168 PE=2 SV=1 - [SMKY_MOUSE]													1	1	0	0						2.14854	2.17	1	1	#DIV/0!	#DIV/0!	0
A1KXC4	Fas apoptotic inhibitory molecule 3 OS=Mus musculus OX=10090 GN=Fcmr PE=2 SV=2 - [FAIM3_MOUSE]													1	1	0	0						4.31368	8.53	1	1	#DIV/0!	#DIV/0!	0
A2AN08	E3 ubiquitin-protein ligase UBR4 OS=Mus musculus OX=10090 GN=Ubr4 PE=1 SV=1 - [UBR4_MOUSE]													1	1	0	0						3.9871	0.44	1	1	#DIV/0!	#DIV/0!	0
A2ARV4	Low-density lipoprotein receptor-related protein 2 OS=Mus musculus OX=10090 GN=Lrp2 PE=1 SV=1 - [LRP2_MOUSE]	1	0	0						2.9244	0.47	1	1														#DIV/0!	#DIV/0!	0
A3KMP2	Tetratricopeptide repeat protein 38 OS=Mus musculus OX=10090 GN=Ttc38 PE=1 SV=2 - [TTC38_MOUSE]													1	1	0	0						2.6316	4.09	1	1	#DIV/0!	#DIV/0!	0
A6H584	Collagen alpha-5(VI) chain OS=Mus musculus OX=10090 GN=Col6a5 PE=1 SV=4 - [CO6A5_MOUSE]	1	0	0						3.19289	0.64	1	1														#DIV/0!	#DIV/0!	0
F8VPN2	Testis-expressed protein 15 OS=Mus musculus OX=10090 GN=Tex15 PE=2 SV=1 - [TEX15_MOUSE]	1	0	0						2.92373	0.68	1	2														#DIV/0!	#DIV/0!	0
O08709	Peroxiredoxin-6 OS=Mus musculus OX=10090 GN=Prdx6 PE=1 SV=3 - [PRDX6_MOUSE]													1	1	0	0						0	4.91	1	1	#DIV/0!	#DIV/0!	0
O08848	60 kDa SS-A/Ro ribonucleoprotein OS=Mus musculus OX=10090 GN=RO60 PE=1 SV=1 - [RO60_MOUSE]													1	1	0	0						2.03944	3.9	1	1	#DIV/0!	#DIV/0!	0
O08919	Numb-like protein OS=Mus musculus OX=10090 GN=Numbl PE=1 SV=3 - [NUMBL_MOUSE]	1	0	0						3.42539	2.81	1	1														#DIV/0!	#DIV/0!	0
O55236	mRNA-capping enzyme OS=Mus musculus OX=10090 GN=Rngtt PE=1 SV=1 - [MCE1_MOUSE]	1	0	0						0	1.01	1	1														#DIV/0!	#DIV/0!	0
O88427	Voltage-dependent T-type calcium channel subunit alpha-1H OS=Mus musculus OX=10090 GN=Cacna1h PE=1 SV=3 - [CAC1H_MOUSE]													1	1	0	0						0	1.61	1	2	#DIV/0!	#DIV/0!	0
P06837	Neuromodulin OS=Mus musculus OX=10090 GN=Gap43 PE=1 SV=1 - [NEUM_MOUSE]	1	0	0						1.78535	4.85	1	1														#DIV/0!	#DIV/0!	0
P08399	Putative per-hexamer repeat protein 5 OS=Mus musculus OX=10090 GN=Phxr5 PE=5 SV=2 - [PHXR5_MOUSE]													1	1	0	0						2.40777	2.68	1	1	#DIV/0!	#DIV/0!	0
P0C7M9	C-type lectin domain family 2 member L OS=Mus musculus OX=10090 GN=Clec2l PE=1 SV=1 - [CLC2L_MOUSE]													1	1	0	0						0	10.9	1	1	#DIV/0!	#DIV/0!	0
P14824	Annexin A6 OS=Mus musculus OX=10090 GN=Anxa6 PE=1 SV=3 - [ANXA6_MOUSE]													1	1	0	0						0	1.19	1	1	#DIV/0!	#DIV/0!	0
P18530	Ig heavy chain V region 7-39 OS=Mus musculus OX=10090 PE=4 SV=1 - [HVM59_MOUSE]	1	0	0						3.00057	17.95	1	1														#DIV/0!	#DIV/0!	0
P19973	Lymphocyte-specific protein 1 OS=Mus musculus OX=10090 GN=Lsp1 PE=1 SV=2 - [LSP1_MOUSE]	1	0	0						2.38378	5.45	1	1														#DIV/0!	#DIV/0!	0
P27671	Ras-specific guanine nucleotide-releasing factor 1 OS=Mus musculus OX=10090 GN=Rasgrf1 PE=1 SV=2 - [RGRF1_MOUSE]	1	0	0						3.1845	1.35	1	1														#DIV/0!	#DIV/0!	0
P27870	Proto-oncogene vav OS=Mus musculus OX=10090 GN=Vav1 PE=1 SV=1 - [VAV_MOUSE]	1	0	0						1.83248	1.07	1	1														#DIV/0!	#DIV/0!	0
P51880	Fatty acid-binding protein, brain OS=Mus musculus OX=10090 GN=Fabp7 PE=1 SV=2 - [FABP7_MOUSE]													1	1	0	0						0	10.61	1	1	#DIV/0!	#DIV/0!	0
P57748	Matrix metalloproteinase-20 OS=Mus musculus OX=10090 GN=Mmp20 PE=2 SV=1 - [MMP20_MOUSE]													1	1	0	0						2.73208	2.9	1	1	#DIV/0!	#DIV/0!	0
P57784	U2 small nuclear ribonucleoprotein A' OS=Mus musculus OX=10090 GN=Snrpa1 PE=1 SV=2 - [RU2A_MOUSE]													1	1	0	0						0	3.53	1	1	#DIV/0!	#DIV/0!	0
P59055	Cysteine/serine-rich nuclear protein 3 OS=Mus musculus OX=10090 GN=Csrnp3 PE=1 SV=2 - [CSRN3_MOUSE]													1	1	0	0						3.54404	3.18	1	1	#DIV/0!	#DIV/0!	0
P70187	Hippocampus abundant transcript 1 protein OS=Mus musculus OX=10090 GN=Mfsd14a PE=2 SV=3 - [MF14A_MOUSE]	1	0	0						0	6.94	1	1														#DIV/0!	#DIV/0!	0
P70303	CTP synthase 2 OS=Mus musculus OX=10090 GN=Ctps2 PE=1 SV=1 - [PYRG2_MOUSE]	1	0	0						2.19894	2.05	1	1														#DIV/0!	#DIV/0!	0
P70313	Nitric oxide synthase, endothelial OS=Mus musculus OX=10090 GN=Nos3 PE=1 SV=4 - [NOS3_MOUSE]	1	0	0						1.93061	0.67	1	1														#DIV/0!	#DIV/0!	0
P80560	Receptor-type tyrosine-protein phosphatase N2 OS=Mus musculus OX=10090 GN=Ptprn2 PE=1 SV=2 - [PTPR2_MOUSE]	1	0	0						2.7761	1.8	1	1														#DIV/0!	#DIV/0!	0
Q0P5V2	Sine oculis-binding protein homolog OS=Mus musculus OX=10090 GN=Sobp PE=1 SV=1 - [SOBP_MOUSE]													1	1	0	0						2.6122	2.31	1	1	#DIV/0!	#DIV/0!	0
Q2KHI9	DNA helicase MCM9 OS=Mus musculus OX=10090 GN=Mcm9 PE=1 SV=2 - [MCM9_MOUSE]	1	0	0						0	0.71	1	1														#DIV/0!	#DIV/0!	0
Q2MHN3	Zinc finger homeobox protein 2 OS=Mus musculus OX=10090 GN=Zfhx2 PE=1 SV=1 - [ZFHX2_MOUSE]	1	0	0						4.20429	1.13	1	1														#DIV/0!	#DIV/0!	0
Q2QI47	Usherin OS=Mus musculus OX=10090 GN=Ush2A PE=1 SV=2 - [USH2A_MOUSE]													1	1	0	0						0	0.71	1	1	#DIV/0!	#DIV/0!	0
Q3LAC4	Phosphatidylinositol 3,4,5-trisphosphate-dependent Rac exchanger 2 protein OS=Mus musculus OX=10090 GN=Prex2 PE=1 SV=2 - [PREX2_MOUSE]													1	1	0	0						0	2.13	1	2	#DIV/0!	#DIV/0!	0
Q3TYG6	TOG array regulator of axonemal microtubules protein 2 OS=Mus musculus OX=10090 GN=Togaram2 PE=2 SV=1 - [TGRM2_MOUSE]	1	0	0						3.53463	2.1	1	1														#DIV/0!	#DIV/0!	0
Q3UFQ8	Capping protein, Arp2/3 and myosin-I linker protein 3 OS=Mus musculus OX=10090 GN=Carmil3 PE=1 SV=2 - [CARL3_MOUSE]	1	0	0						3.31093	1.31	1	1														#DIV/0!	#DIV/0!	0
Q3UHI4	Protein TMED8 OS=Mus musculus OX=10090 GN=Tmed8 PE=2 SV=1 - [TMED8_MOUSE]	1	0	0						1.92938	3.07	1	1														#DIV/0!	#DIV/0!	0
Q3UMW7	MAP kinase-activated protein kinase 3 OS=Mus musculus OX=10090 GN=Mapkapk3 PE=1 SV=2 - [MAPK3_MOUSE]	1	0	0						2.72445	3.13	1	1														#DIV/0!	#DIV/0!	0
Q52KB6	C2 domain-containing protein 3 OS=Mus musculus OX=10090 GN=C2cd3 PE=1 SV=3 - [C2CD3_MOUSE]	1	0	0						2.34952	0.82	1	1														#DIV/0!	#DIV/0!	0
Q5BKQ4	Inactive pancreatic lipase-related protein 1 OS=Mus musculus OX=10090 GN=Pnliprp1 PE=1 SV=2 - [LIPR1_MOUSE]													1	1	0	0						3.5661	5.5	1	1	#DIV/0!	#DIV/0!	0
Q5F2E8	Serine/threonine-protein kinase TAO1 OS=Mus musculus OX=10090 GN=Taok1 PE=1 SV=1 - [TAOK1_MOUSE]	1	0	0						2.92455	1.5	1	1														#DIV/0!	#DIV/0!	0
Q5GH67	XK-related protein 4 OS=Mus musculus OX=10090 GN=Xkr4 PE=1 SV=1 - [XKR4_MOUSE]	1	0	0						3.54925	3.71	1	1														#DIV/0!	#DIV/0!	0
Q5U4F6	Cytoplasmic dynein 2 intermediate chain 2 OS=Mus musculus OX=10090 GN=Dync2i2 PE=1 SV=3 - [DC2I2_MOUSE]	1	0	0						3.35048	3.54	1	1														#DIV/0!	#DIV/0!	0
Q5XG71	Small subunit processome component 20 homolog OS=Mus musculus OX=10090 GN=Utp20 PE=1 SV=2 - [UTP20_MOUSE]													1	1	0	0						0	0.32	1	1	#DIV/0!	#DIV/0!	0
Q61188	Histone-lysine N-methyltransferase EZH2 OS=Mus musculus OX=10090 GN=Ezh2 PE=1 SV=2 - [EZH2_MOUSE]													1	1	0	0						0	0.8	1	1	#DIV/0!	#DIV/0!	0
Q61271	Activin receptor type-1B OS=Mus musculus OX=10090 GN=Acvr1b PE=1 SV=1 - [ACV1B_MOUSE]													1	1	0	0						3.03826	5.54	1	1	#DIV/0!	#DIV/0!	0
Q61941	NAD(P) transhydrogenase, mitochondrial OS=Mus musculus OX=10090 GN=Nnt PE=1 SV=2 - [NNTM_MOUSE]	1	0	0						3.21401	4.42	1	1														#DIV/0!	#DIV/0!	0
Q62018	RNA polymerase-associated protein CTR9 homolog OS=Mus musculus OX=10090 GN=Ctr9 PE=1 SV=2 - [CTR9_MOUSE]													1	1	0	0						2.23709	0.94	1	1	#DIV/0!	#DIV/0!	0
Q62407	Striated muscle-specific serine/threonine-protein kinase OS=Mus musculus OX=10090 GN=Speg PE=1 SV=2 - [SPEG_MOUSE]													1	1	0	0						1.75548	0.28	1	1	#DIV/0!	#DIV/0!	0
Q640P4	Glycosyltransferase 8 domain-containing protein 2 OS=Mus musculus OX=10090 GN=Glt8d2 PE=2 SV=1 - [GL8D2_MOUSE]													1	1	0	0						2.94282	6.88	1	1	#DIV/0!	#DIV/0!	0
Q64464	Cytochrome P450 3A13 OS=Mus musculus OX=10090 GN=Cyp3a13 PE=1 SV=1 - [CP3AD_MOUSE]	1	0	0						3.41467	7.16	1	1														#DIV/0!	#DIV/0!	0
Q6EJB6	U3 small nucleolar RNA-associated protein 14 homolog B OS=Mus musculus OX=10090 GN=Utp14b PE=1 SV=2 - [UT14B_MOUSE]	1	0	0						2.68001	1.98	1	1														#DIV/0!	#DIV/0!	0
Q6PB51	Coiled-coil domain-containing protein 117 OS=Mus musculus OX=10090 GN=Ccdc117 PE=1 SV=1 - [CC117_MOUSE]	1	0	0						3.58089	7.58	1	1														#DIV/0!	#DIV/0!	0
Q6PCL9	Poly(A) polymerase gamma OS=Mus musculus OX=10090 GN=Papolg PE=1 SV=1 - [PAPOG_MOUSE]													1	1	0	0						2.9971	2.84	1	1	#DIV/0!	#DIV/0!	0
Q6PGF7	Exocyst complex component 8 OS=Mus musculus OX=10090 GN=Exoc8 PE=1 SV=1 - [EXOC8_MOUSE]	1	0	0						0	2.23	1	1														#DIV/0!	#DIV/0!	0
Q6ZQ58	La-related protein 1 OS=Mus musculus OX=10090 GN=Larp1 PE=1 SV=3 - [LARP1_MOUSE]	1	0	0						2.81643	1.21	1	1														#DIV/0!	#DIV/0!	0
Q76I79	Protein phosphatase Slingshot homolog 1 OS=Mus musculus OX=10090 GN=Ssh1 PE=1 SV=1 - [SSH1_MOUSE]	1	0	0						3.82337	2.11	1	1														#DIV/0!	#DIV/0!	0
Q7TNC6	Kinesin-like protein KIF26B OS=Mus musculus OX=10090 GN=Kif26b PE=1 SV=3 - [KI26B_MOUSE]	1	0	0						2.2542	0.9	1	1														#DIV/0!	#DIV/0!	0
Q80UU2	Ribonuclease P protein subunit p38 OS=Mus musculus OX=10090 GN=Rpp38 PE=1 SV=1 - [RPP38_MOUSE]													1	1	0	0						3.62352	6.43	1	1	#DIV/0!	#DIV/0!	0
Q80X80	Phospholipid transfer protein C2CD2L OS=Mus musculus OX=10090 GN=C2cd2l PE=1 SV=3 - [C2C2L_MOUSE]													1	1	0	0						0	1.42	1	1	#DIV/0!	#DIV/0!	0
Q80YA8	Protein crumbs homolog 2 OS=Mus musculus OX=10090 GN=Crb2 PE=1 SV=3 - [CRUM2_MOUSE]													1	1	0	0						4.53551	1.64	1	1	#DIV/0!	#DIV/0!	0
Q8BJY1	26S proteasome non-ATPase regulatory subunit 5 OS=Mus musculus OX=10090 GN=Psmd5 PE=1 SV=4 - [PSMD5_MOUSE]	1	0	0						4.01565	5.95	1	1														#DIV/0!	#DIV/0!	0
Q8BK58	HSPB1-associated protein 1 OS=Mus musculus OX=10090 GN=Hspbap1 PE=1 SV=2 - [HBAP1_MOUSE]													1	1	0	0						3.41124	3.31	1	1	#DIV/0!	#DIV/0!	0
Q8BM65	Neuronal tyrosine-phosphorylated phosphoinositide-3-kinase adapter 2 OS=Mus musculus OX=10090 GN=Nyap2 PE=1 SV=1 - [NYAP2_MOUSE]													1	1	0	0						2.71684	3.37	1	1	#DIV/0!	#DIV/0!	0
Q8BMY7	Serine protease inhibitor Kazal-type 2 OS=Mus musculus OX=10090 GN=Spink2 PE=1 SV=1 - [ISK2_MOUSE]													1	1	0	0						0	11.63	1	1	#DIV/0!	#DIV/0!	0
Q8BMZ5	tRNA-splicing endonuclease subunit Sen34 OS=Mus musculus OX=10090 GN=Tsen34 PE=2 SV=2 - [SEN34_MOUSE]	1	0	0						3.43838	5.38	1	1														#DIV/0!	#DIV/0!	0
Q8BND4	Integrator complex subunit 6-like OS=Mus musculus OX=10090 GN=Ints6l PE=2 SV=1 - [INT6L_MOUSE]													1	1	0	0						3.16503	3.02	1	1	#DIV/0!	#DIV/0!	0
Q8BX51	Zeta-sarcoglycan OS=Mus musculus OX=10090 GN=Sgcz PE=2 SV=1 - [SGCZ_MOUSE]													1	1	0	0						2.86261	5.79	1	1	#DIV/0!	#DIV/0!	0
Q8BXQ6	Aminopeptidase O OS=Mus musculus OX=10090 GN=Aopep PE=2 SV=2 - [AMPO_MOUSE]	1	0	0						2.64348	1.84	1	1														#DIV/0!	#DIV/0!	0
Q8BY98	Ankyrin repeat domain-containing protein SOWAHD OS=Mus musculus OX=10090 GN=Sowahd PE=2 SV=1 - [SWAHD_MOUSE]	1	0	0						2.31094	4.28	1	1														#DIV/0!	#DIV/0!	0
Q8BZ32	Putative Polycomb group protein ASXL2 OS=Mus musculus OX=10090 GN=Asxl2 PE=1 SV=1 - [ASXL2_MOUSE]													1	1	0	0						0	2.55	1	2	#DIV/0!	#DIV/0!	0
Q8C033	Rho guanine nucleotide exchange factor 10 OS=Mus musculus OX=10090 GN=Arhgef10 PE=1 SV=2 - [ARHGA_MOUSE]	1	0	0						3.74547	1.41	1	1														#DIV/0!	#DIV/0!	0
Q8C754	Vacuolar protein sorting-associated protein 52 homolog OS=Mus musculus OX=10090 GN=Vps52 PE=1 SV=1 - [VPS52_MOUSE]	1	0	0						1.87917	1.8	1	1														#DIV/0!	#DIV/0!	0
Q8CD54	Piezo-type mechanosensitive ion channel component 2 OS=Mus musculus OX=10090 GN=Piezo2 PE=1 SV=2 - [PIEZ2_MOUSE]													1	1	0	0						2.24524	1.06	1	1	#DIV/0!	#DIV/0!	0
Q8K045	Serine/threonine-protein kinase N3 OS=Mus musculus OX=10090 GN=Pkn3 PE=1 SV=1 - [PKN3_MOUSE]	1	0	0						2.86928	2.51	1	1														#DIV/0!	#DIV/0!	0
Q8K214	Polycomb protein SCMH1 OS=Mus musculus OX=10090 GN=Scmh1 PE=1 SV=1 - [SCMH1_MOUSE]	1	0	0						1.7608	1.27	1	1														#DIV/0!	#DIV/0!	0
Q8K274	Ketosamine-3-kinase OS=Mus musculus OX=10090 GN=Fn3krp PE=1 SV=2 - [KT3K_MOUSE]													1	1	0	0						0	1.94	1	1	#DIV/0!	#DIV/0!	0
Q8K327	Chromosome alignment-maintaining phosphoprotein 1 OS=Mus musculus OX=10090 GN=Champ1 PE=1 SV=1 - [CHAP1_MOUSE]	1	0	0						0	0.87	1	1														#DIV/0!	#DIV/0!	0
Q8K368	Fanconi anemia group I protein homolog OS=Mus musculus OX=10090 GN=Fanci PE=1 SV=2 - [FANCI_MOUSE]													1	1	0	0						2.80309	1.95	1	1	#DIV/0!	#DIV/0!	0
Q8R2Z3	Anion exchange transporter OS=Mus musculus OX=10090 GN=Slc26a7 PE=2 SV=3 - [S26A7_MOUSE]													1	1	0	0						1.706	1.52	1	1	#DIV/0!	#DIV/0!	0
Q8R5H1	Ubiquitin carboxyl-terminal hydrolase 15 OS=Mus musculus OX=10090 GN=Usp15 PE=1 SV=1 - [UBP15_MOUSE]													1	1	0	0						2.0583	1.22	1	1	#DIV/0!	#DIV/0!	0
Q920N7	Synaptotagmin-12 OS=Mus musculus OX=10090 GN=Syt12 PE=1 SV=1 - [SYT12_MOUSE]													1	1	0	0						2.67332	8.08	1	1	#DIV/0!	#DIV/0!	0
Q9CZP5	Mitochondrial chaperone BCS1 OS=Mus musculus OX=10090 GN=Bcs1l PE=1 SV=1 - [BCS1_MOUSE]	1	0	0						3.17688	5.26	1	1														#DIV/0!	#DIV/0!	0
Q9D1R1	Complex I assembly factor TMEM126B, mitochondrial OS=Mus musculus OX=10090 GN=Tmem126b PE=1 SV=1 - [T126B_MOUSE]													1	1	0	0						7.01499	8.7	1	2	#DIV/0!	#DIV/0!	0
Q9D5J6	Sedoheptulokinase OS=Mus musculus OX=10090 GN=Shpk PE=1 SV=1 - [SHPK_MOUSE]	1	0	0						2.2049	2.1	1	1														#DIV/0!	#DIV/0!	0
Q9D620	Rab11 family-interacting protein 1 OS=Mus musculus OX=10090 GN=Rab11fip1 PE=1 SV=2 - [RFIP1_MOUSE]													1	1	0	0						2.76325	1.55	1	1	#DIV/0!	#DIV/0!	0
Q9D8M4	60S ribosomal protein L7-like 1 OS=Mus musculus OX=10090 GN=Rpl7l1 PE=1 SV=1 - [RL7L_MOUSE]	1	0	0						2.91353	5.69	1	1														#DIV/0!	#DIV/0!	0
Q9DBJ1	Phosphoglycerate mutase 1 OS=Mus musculus OX=10090 GN=Pgam1 PE=1 SV=3 - [PGAM1_MOUSE]													1	1	0	0						1.86007	5.51	1	1	#DIV/0!	#DIV/0!	0
Q9DBL7	Bifunctional coenzyme A synthase OS=Mus musculus OX=10090 GN=Coasy PE=1 SV=2 - [COASY_MOUSE]													1	1	0	0						3.42101	4.62	1	2	#DIV/0!	#DIV/0!	0
Q9DBS8	Centrosomal protein POC5 OS=Mus musculus OX=10090 GN=Poc5 PE=2 SV=1 - [POC5_MOUSE]	1	0	0						2.8892	3.41	1	2														#DIV/0!	#DIV/0!	0
Q9EPK2	Protein XRP2 OS=Mus musculus OX=10090 GN=Rp2 PE=1 SV=3 - [XRP2_MOUSE]	1	0	0						1.66699	2.31	1	1														#DIV/0!	#DIV/0!	0
Q9EPQ2	X-linked retinitis pigmentosa GTPase regulator-interacting protein 1 OS=Mus musculus OX=10090 GN=Rpgrip1 PE=1 SV=1 - [RPGR1_MOUSE]	1	0	0						2.07335	0.98	1	1														#DIV/0!	#DIV/0!	0
Q9EQB9	Zinc finger protein 287 OS=Mus musculus OX=10090 GN=Znf287 PE=2 SV=2 - [ZN287_MOUSE]													1	1	0	0						0	1.98	1	1	#DIV/0!	#DIV/0!	0
Q9JIS7	Voltage-dependent L-type calcium channel subunit alpha-1F OS=Mus musculus OX=10090 GN=Cacna1f PE=1 SV=1 - [CAC1F_MOUSE]													1	1	0	0						0	1.26	1	1	#DIV/0!	#DIV/0!	0
Q9R1A3	Netrin-3 OS=Mus musculus OX=10090 GN=Ntn3 PE=2 SV=1 - [NET3_MOUSE]	1	0	0						3.28402	2.41	1	1														#DIV/0!	#DIV/0!	0
Q9WU40	Inner nuclear membrane protein Man1 OS=Mus musculus OX=10090 GN=Lemd3 PE=1 SV=2 - [MAN1_MOUSE]	1	0	0						0	0.76	1	1														#DIV/0!	#DIV/0!	0
Q9WVB4	Slit homolog 3 protein OS=Mus musculus OX=10090 GN=Slit3 PE=2 SV=2 - [SLIT3_MOUSE]	1	0	0						0	0.92	1	1														#DIV/0!	#DIV/0!	0
Q9Z0W3	Nuclear pore complex protein Nup160 OS=Mus musculus OX=10090 GN=Nup160 PE=1 SV=2 - [NU160_MOUSE]	1	0	0						3.37075	2.64	1	2														#DIV/0!	#DIV/0!	0
Q9Z1N9	Protein unc-13 homolog B OS=Mus musculus OX=10090 GN=Unc13b PE=1 SV=2 - [UN13B_MOUSE]													1	1	0	0						3.22875	2.37	1	1	#DIV/0!	#DIV/0!	0
Q9Z207	Protein diaphanous homolog 3 OS=Mus musculus OX=10090 GN=Diaph3 PE=1 SV=1 - [DIAP3_MOUSE]	1	0	0						3.92732	1.79	1	1														#DIV/0!	#DIV/0!	0

## Sheet: AII SAINT analysis
	SAINT analysis performed via REPRINT-apms.org using only experiment-specific controls. Data quantified by Peptide Spectral Matches (SPC) and ranked by SAINT probability score (SP)
bait	baitGene	prey	preyGene	Quant (SPC or Intensities)	User Controls (SPC or Intensities)	CRAP Controls (SPC)	Avg. SPC	FCA	FCB	SP	iRef	intAct	iRef-Evidence	intAct-Evidence
Gjd2	Gjd2	Q9JKY5	Hip1r	7|3	0|0	-	5	5.47936	5.22353	1	0	0	na	na
Gjd2	Gjd2	O54851	Gjd2	27|12	0|0	-	19.5	18.4793	17.415	1	0	0	na	na
Gjd2	Gjd2	Q9Z0U1	Tjp2	12|9	1|2	-	10.5	4.20951	4.18955	1	0	0	na	na
Gjd2	Gjd2	Q61001	Lama5	11|4	0|0	-	7.5	7.70274	7.121	1	0	0	na	na
Gjd2	Gjd2	Q61548	Snap91	9|8	0|0	-	8.5	8.70951	8.70771	1	0	0	na	na
Gjd2	Gjd2	P68373	Tuba1c	53|20	0|0	-	36.5	33.6374	30.6733	1	0	0	na	na
Gjd2	Gjd2	Q60902	Eps15l1	16|11	0|0	-	13.5	13.1889	13.061	1	0	0	na	na
Gjd2	Gjd2	Q9Z0R4	Itsn1	11|13	0|0	-	12	11.9397	11.8686	1	0	0	na	na
Gjd2	Gjd2	Q8R1A4	Dock7	17|6	0|0	-	11.5	11.2732	10.2812	1	0	0	na	na
Gjd2	Gjd2	Q3UNH4	Gprin1	6|4	0|0	-	5	5.51198	5.46129	1	0	0	na	na
Gjd2	Gjd2	G3X9J0	Sipa1l3	44|13	3|0	-	28.5	10.4677	9.0746	0.99	0	0	na	na
Gjd2	Gjd2	O08599	Stxbp1	6|2	0|0	-	4	4.57044	4.24756	0.98	0	0	na	na
Gjd2	Gjd2	Q80VP1	Epn1	6|2	0|0	-	4	4.57044	4.24756	0.98	0	0	na	na
Gjd2	Gjd2	Q91VW5	Golga4	5|2	0|0	-	3.5	4.13229	3.93895	0.98	0	0	na	na
Gjd2	Gjd2	Q7TSJ2	Map6	33|17	5|6	-	25	3.61293	3.47347	0.98	0	0	na	na
Gjd2	Gjd2	Q3UHJ0	Aak1	2|3	0|0	-	2.5	3.28861	3.24463	0.98	0	0	na	na
Gjd2	Gjd2	Q61327	Slc6a3	2|2	0|0	-	2	2.81784	2.81709	0.96	0	0	na	na
Gjd2	Gjd2	Q811P8	Arhgap32	7|6	1|2	-	6.5	2.7643	2.76259	0.92	0	0	na	na
Gjd2	Gjd2	P02468	Lamc1	5|3	0|1	-	4	3.08331	3.0389	0.91	0	0	na	na
Gjd2	Gjd2	Q61292	Lamb2	3|3	0|1	-	3	2.49633	2.49547	0.83	0	0	na	na
Gjd2	Gjd2	Q3UHD3	Mtus2	3|3	1|0	-	3	2.47247	2.47162	0.83	0	0	na	na
Gjd2	Gjd2	Q61781	Krt14	16|9	0|5	-	12.5	3.53511	3.44327	0.83	0	0	na	na
Gjd2	Gjd2	P39447	Tjp1	48|23	1|12	-	35.5	4.42719	4.20833	0.82	0	0	na	na
Gjd2	Gjd2	O35600	ABCA4	2|5	1|0	-	3.5	2.80643	2.62967	0.78	0	0	na	na
Gjd2	Gjd2	Q9WVL4	Grk1	2|8	1|0	-	5	3.74341	3.21517	0.78	0	0	na	na
Gjd2	Gjd2	Q80Z38	Shank2	12|7	3|2	-	9.5	2.72349	2.66541	0.76	0	0	na	na
Gjd2	Gjd2	Q8K0U4	Hspa12a	4|2	1|0	-	3	2.45083	2.39103	0.76	0	0	na	na
Gjd2	Gjd2	Q60952	Cep250	2|4	1|0	-	3	2.49411	2.40301	0.76	0	0	na	na
Gjd2	Gjd2	Q6P2B1	Tnpo3	3|2	0|1	-	2.5	2.18099	2.16664	0.7	0	0	na	na
Gjd2	Gjd2	P23440	Pde6b	2|3	1|0	-	2.5	2.18178	2.15261	0.7	0	0	na	na
Gjd2	Gjd2	F6SEU4	Syngap1	2|3	0|1	-	2.5	2.20284	2.17338	0.7	0	0	na	na
Gjd2	Gjd2	P08122	Col4a2	3|5	1|1	-	4	2.33391	2.27533	0.69	0	0	na	na
Gjd2	Gjd2	P13595	Ncam1	57|48	12|21	-	52.5	2.7853	2.78196	0.62	0	0	na	na
Gjd2	Gjd2	Q91V14	Slc12a5	11|2	2|0	-	6.5	3.35608	2.74912	0.62	0	0	na	na
Gjd2	Gjd2	Q8C8Y5	Samd7	4|3	1|1	-	3.5	2.08225	2.07528	0.61	0	0	na	na
Gjd2	Gjd2	Q9WU42	Ncor2	2|2	1|0	-	2	1.86946	1.86896	0.56	0	0	na	na
Gjd2	Gjd2	Q61554	Fbn1	11|19	3|7	-	15	2.47217	2.37372	0.51	0	0	na	na
Gjd2	Gjd2	P52785	Gucy2e	4|12	3|2	-	8	2.39525	2.12207	0.51	0	0	na	na
Gjd2	Gjd2	Q6Q477	Atp2b4	3|0	0|0	-	1.5	2.31445	1.90497	0.5	0	0	na	na
Gjd2	Gjd2	Q9WUM4	Coro1c	3|0	0|0	-	1.5	2.31445	1.90497	0.5	0	0	na	na
Gjd2	Gjd2	Q9DB77	Uqcrc2	3|0	0|0	-	1.5	2.31445	1.90497	0.5	0	0	na	na
Gjd2	Gjd2	Q9DC07	Nebl	3|1	0|0	-	2	2.78522	2.65437	0.5	0	0	na	na
Gjd2	Gjd2	Q6PGB8	Smarca1	0|14	0|0	-	7	7.59078	3.76584	0.5	0	0	na	na
Gjd2	Gjd2	Q8R1B5	Cplx3	11|1	2|0	-	6	3.12241	2.256	0.5	0	0	na	na
Gjd2	Gjd2	Q99P72	Rtn4	4|1	0|0	-	2.5	3.22337	2.95754	0.5	0	0	na	na
Gjd2	Gjd2	Q6PAL8	Dennd5a	0|3	0|0	-	1.5	2.41231	1.95566	0.5	0	0	na	na
Gjd2	Gjd2	Q7M6Y3	Picalm	9|0	0|0	-	4.5	4.94335	2.98106	0.5	0	0	na	na
Gjd2	Gjd2	Q8R1M2	H2aj	0|3	0|0	-	1.5	2.41231	1.95566	0.5	0	0	na	na
Gjd2	Gjd2	Q9JHU4	Dync1h1	14|1	5|2	-	7.5	1.68163	1.12232	0.5	0	0	na	na
Gjd2	Gjd2	Q9WTL7	Lypla2	3|0	0|0	-	1.5	2.31445	1.90497	0.5	0	0	na	na
Gjd2	Gjd2	Q80YR5	Safb2	0|4	0|0	-	2	2.88308	2.18315	0.5	0	0	na	na
Gjd2	Gjd2	Q61878	Prg2	8|0	0|1	-	4	3.01776	1.89582	0.5	0	0	na	na
Gjd2	Gjd2	Q8C0T5	Sipa1l1	3|0	0|0	-	1.5	2.31445	1.90497	0.5	0	0	na	na
Gjd2	Gjd2	Q8K363	Ddx18	0|5	0|0	-	2.5	3.35385	2.38908	0.5	0	0	na	na
Gjd2	Gjd2	Q8K1I7	Wipf1	0|3	0|0	-	1.5	2.41231	1.95566	0.5	0	0	na	na
Gjd2	Gjd2	Q923T9	Camk2g	4|0	0|0	-	2	2.7526	2.12255	0.5	0	0	na	na
Gjd2	Gjd2	Q8BGZ7	Krt75	18|0	0|0	-	9	8.88671	4.09554	0.5	0	0	na	na
Gjd2	Gjd2	P28652	Camk2b	3|0	0|0	-	1.5	2.31445	1.90497	0.5	0	0	na	na
Gjd2	Gjd2	Q5SDA5	Gucy2f	0|4	0|0	-	2	2.88308	2.18315	0.5	0	0	na	na
Gjd2	Gjd2	Q8BRB7	Kat6b	0|5	0|0	-	2.5	3.35385	2.38908	0.5	0	0	na	na
Gjd2	Gjd2	P16546	Sptan1	0|4	0|0	-	2	2.88308	2.18315	0.5	0	0	na	na
Gjd2	Gjd2	Q9Z2T6	Krt85	3|0	0|0	-	1.5	2.31445	1.90497	0.5	0	0	na	na
Gjd2	Gjd2	Q5DTL9	Slc4a10	3|1	0|0	-	2	2.78522	2.65437	0.5	0	0	na	na
Gjd2	Gjd2	P11087	Col1a1	1|10	1|2	-	5.5	2.46514	1.77317	0.5	0	0	na	na
Gjd2	Gjd2	Q8CGP0	H2bu1	0|10	0|0	-	5	5.7077	3.22729	0.5	0	0	na	na
Gjd2	Gjd2	Q91ZZ3	Sncb	4|0	0|0	-	2	2.7526	2.12255	0.5	0	0	na	na
Gjd2	Gjd2	Q9D2V7	Coro7	3|0	0|0	-	1.5	2.31445	1.90497	0.5	0	0	na	na
Gjd2	Gjd2	P16381	D1Pas1	0|3	0|0	-	1.5	2.41231	1.95566	0.5	0	0	na	na
Gjd2	Gjd2	Q6PHZ2	Camk2d	4|0	0|0	-	2	2.7526	2.12255	0.5	0	0	na	na
Gjd2	Gjd2	Q64331	Myo6	59|40	18|22	-	49.5	2.17789	2.15202	0.5	0	0	na	na
Gjd2	Gjd2	Q3UL36	Arglu1	0|5	0|1	-	2.5	2.24654	1.6003	0.49	0	0	na	na
Gjd2	Gjd2	Q7TN98	Cpeb4	0|2	0|0	-	1	1.94154	1.69796	0.48	0	0	na	na
Gjd2	Gjd2	Q5DTW7	Resf1	2|1	0|0	-	1.5	2.34707	2.31177	0.48	0	0	na	na
Gjd2	Gjd2	Q8BLX7	Col16a1	0|2	0|0	-	1	1.94154	1.69796	0.48	0	0	na	na
Gjd2	Gjd2	P17156	P17156	2|0	0|0	-	1	1.8763	1.6591	0.48	0	0	na	na
Gjd2	Gjd2	Q80YE4	Aatk	2|0	0|0	-	1	1.8763	1.6591	0.48	0	0	na	na
Gjd2	Gjd2	Q9Z315	Sart1	0|2	0|0	-	1	1.94154	1.69796	0.48	0	0	na	na
Gjd2	Gjd2	Q03717	Kcnb	2|0	0|0	-	1	1.8763	1.6591	0.48	0	0	na	na
Gjd2	Gjd2	Q61115	Ptch1	0|2	0|0	-	1	1.94154	1.69796	0.48	0	0	na	na
Gjd2	Gjd2	Q8BGD9	Eif4b	2|0	0|0	-	1	1.8763	1.6591	0.48	0	0	na	na
Gjd2	Gjd2	Q6P9K8	Caskin1	2|0	0|0	-	1	1.8763	1.6591	0.48	0	0	na	na
Gjd2	Gjd2	Q5SV85	Synrg	11|3	3|3	-	7	1.80772	1.5945	0.48	0	0	na	na
Gjd2	Gjd2	Q6URW6	Myh14	2|0	0|0	-	1	1.8763	1.6591	0.48	0	0	na	na
Gjd2	Gjd2	Q61595	Ktn1	2|0	0|0	-	1	1.8763	1.6591	0.48	0	0	na	na
Gjd2	Gjd2	P84104	Srsf3	0|2	0|0	-	1	1.94154	1.69796	0.48	0	0	na	na
Gjd2	Gjd2	Q6ZQ38	Cand1	2|0	0|0	-	1	1.8763	1.6591	0.48	0	0	na	na
Gjd2	Gjd2	P27664	Pde6a	2|0	0|0	-	1	1.8763	1.6591	0.48	0	0	na	na
Gjd2	Gjd2	P62827	Ran	2|0	0|0	-	1	1.8763	1.6591	0.48	0	0	na	na
Gjd2	Gjd2	Q8CE72	Cplane1	2|0	0|0	-	1	1.8763	1.6591	0.48	0	0	na	na
Gjd2	Gjd2	Q497I4	Krt35	2|0	0|0	-	1	1.8763	1.6591	0.48	0	0	na	na
Gjd2	Gjd2	Q3UHD1	Adgrb1	1|2	0|0	-	1.5	2.37969	2.32584	0.48	0	0	na	na
Gjd2	Gjd2	A2AJA9	Ajm1	1|2	0|0	-	1.5	2.37969	2.32584	0.48	0	0	na	na
Gjd2	Gjd2	P70266	Pfkfb1	2|0	0|0	-	1	1.8763	1.6591	0.48	0	0	na	na
Gjd2	Gjd2	P53986	Slc16a1	2|0	0|0	-	1	1.8763	1.6591	0.48	0	0	na	na
Gjd2	Gjd2	Q3UTQ7	Prdm10	0|2	0|0	-	1	1.94154	1.69796	0.48	0	0	na	na
Gjd2	Gjd2	P42225	Stat1	2|0	0|0	-	1	1.8763	1.6591	0.48	0	0	na	na
Gjd2	Gjd2	B7ZNG0	Kif7	0|2	0|0	-	1	1.94154	1.69796	0.48	0	0	na	na
Gjd2	Gjd2	P68040	Rack1	2|0	0|0	-	1	1.8763	1.6591	0.48	0	0	na	na
Gjd2	Gjd2	Q62523	Zyx	2|0	0|0	-	1	1.8763	1.6591	0.48	0	0	na	na
Gjd2	Gjd2	Q8CG65	Sspo	0|2	0|0	-	1	1.94154	1.69796	0.48	0	0	na	na
Gjd2	Gjd2	D3YWQ0	Dgki	0|2	0|0	-	1	1.94154	1.69796	0.48	0	0	na	na
Gjd2	Gjd2	A2AHJ4	Brwd3	0|2	0|0	-	1	1.94154	1.69796	0.48	0	0	na	na
Gjd2	Gjd2	Q6P5C7	Znf728	0|2	0|0	-	1	1.94154	1.69796	0.48	0	0	na	na
Gjd2	Gjd2	Q80TL7	Mon2	2|0	0|0	-	1	1.8763	1.6591	0.48	0	0	na	na
Gjd2	Gjd2	Q6NS46	Pdcd11	0|2	0|0	-	1	1.94154	1.69796	0.48	0	0	na	na
Gjd2	Gjd2	P70333	Hnrnph2	2|0	0|0	-	1	1.8763	1.6591	0.48	0	0	na	na
Gjd2	Gjd2	Q8BMK4	Ckap4	0|4	0|1	-	2	1.9312	1.46236	0.48	0	0	na	na
Gjd2	Gjd2	E9Q3L2	Pi4ka	2|0	0|0	-	1	1.8763	1.6591	0.48	0	0	na	na
Gjd2	Gjd2	Q571H0	Urb1	2|0	0|0	-	1	1.8763	1.6591	0.48	0	0	na	na
Gjd2	Gjd2	Q9QZQ1	Afdn	2|0	0|0	-	1	1.8763	1.6591	0.48	0	0	na	na
Gjd2	Gjd2	Q6GQX2	Nckap5l	0|2	0|0	-	1	1.94154	1.69796	0.48	0	0	na	na
Gjd2	Gjd2	Q9QZZ4	Myo15a	2|0	0|0	-	1	1.8763	1.6591	0.48	0	0	na	na
Gjd2	Gjd2	P63038	Hspd1	0|2	0|0	-	1	1.94154	1.69796	0.48	0	0	na	na
Gjd2	Gjd2	Q80TZ3	Dnajc6	2|0	0|0	-	1	1.8763	1.6591	0.48	0	0	na	na
Gjd2	Gjd2	Q8C2Q3	Rbm14	2|0	0|0	-	1	1.8763	1.6591	0.48	0	0	na	na
Gjd2	Gjd2	P27546	Map4	8|1	2|2	-	4.5	1.65843	1.31438	0.47	0	0	na	na
Gjd2	Gjd2	Q9Z273	Tulp1	0|10	0|3	-	5	2.3027	1.30201	0.47	0	0	na	na
Gjd2	Gjd2	Q8K2J0	Plcd3	2|8	0|3	-	5	2.27639	1.95516	0.47	0	0	na	na
Gjd2	Gjd2	Q6IQX8	Znf219	0|6	0|2	-	3	1.92599	1.29853	0.45	0	0	na	na
Gjd2	Gjd2	Q8K224	Nat10	0|6	0|2	-	3	1.92599	1.29853	0.45	0	0	na	na
Gjd2	Gjd2	Q6DFW4	Nop58	0|14	0|6	-	7	1.91813	0.951598	0.44	0	0	na	na
Gjd2	Gjd2	Q5EBP3	Armc5	7|16	1|7	-	11.5	2.33972	2.15941	0.43	0	0	na	na
Gjd2	Gjd2	O70172	Pip4k2a	6|5	0|4	-	5.5	2.01332	2.01119	0.43	0	0	na	na
Gjd2	Gjd2	Q60592	Mast2	0|3	0|1	-	1.5	1.61586	1.30998	0.42	0	0	na	na
Gjd2	Gjd2	Q61666	Hira	0|3	0|1	-	1.5	1.61586	1.30998	0.42	0	0	na	na
Gjd2	Gjd2	Q922P9	Glyr1	2|13	0|6	-	7.5	2.0206	1.52548	0.42	0	0	na	na
Gjd2	Gjd2	G5E8P1	Brd1	0|9	0|4	-	4.5	1.76233	1.0358	0.42	0	0	na	na
Gjd2	Gjd2	E9Q5M6	Cfap44	3|0	1|0	-	1.5	1.53549	1.26382	0.42	0	0	na	na
Gjd2	Gjd2	B2RSH2	Gnai1	0|3	0|1	-	1.5	1.61586	1.30998	0.42	0	0	na	na
Gjd2	Gjd2	Q8R361	Rab11fip5	0|3	0|1	-	1.5	1.61586	1.30998	0.42	0	0	na	na
Gjd2	Gjd2	Q9WTU0	Phf2	0|3	0|1	-	1.5	1.61586	1.30998	0.42	0	0	na	na
Gjd2	Gjd2	A2ASS6	Ttn	3|0	0|1	-	1.5	1.55031	1.27602	0.42	0	0	na	na
Gjd2	Gjd2	P14148	Rpl7	5|0	2|0	-	2.5	1.58381	1.15149	0.41	0	0	na	na
Gjd2	Gjd2	Q9D945	Llph	5|0	2|0	-	2.5	1.58381	1.15149	0.41	0	0	na	na
Gjd2	Gjd2	Q3TEA8	Hp1bp3	0|10	0|5	-	5	1.64749	0.931534	0.4	0	0	na	na
Gjd2	Gjd2	Q9Z2D6	Mecp2	1|17	1|8	-	9	1.73218	1.03638	0.39	0	0	na	na
Gjd2	Gjd2	P20612	Gnat1	10|20	9|4	-	15	1.96315	1.84605	0.38	0	0	na	na
Gjd2	Gjd2	Q8CCK0	Macroh2a2	0|4	1|1	-	2	1.44139	1.09147	0.38	0	0	na	na
Gjd2	Gjd2	Q9EQ61	Pes1	2|11	0|6	-	6.5	1.78268	1.41284	0.37	0	0	na	na
Gjd2	Gjd2	Q01149	Col1a2	1|6	0|3	-	3.5	1.71977	1.425	0.37	0	0	na	na
Gjd2	Gjd2	Q80TJ1	Cadps	6|4	2|2	-	5	1.83708	1.82019	0.36	0	0	na	na
Gjd2	Gjd2	P62874	Gnb1	1|4	2|0	-	2.5	1.64857	1.48438	0.35	0	0	na	na
Gjd2	Gjd2	Q6PAQ4	Rexo4	0|4	0|2	-	2	1.45185	1.09938	0.35	0	0	na	na
Gjd2	Gjd2	Q9CWW7	Cxxc1	0|7	0|4	-	3.5	1.44548	0.927159	0.34	0	0	na	na
Gjd2	Gjd2	P11276	Fn1	9|11	3|5	-	10	2.02989	2.01472	0.34	0	0	na	na
Gjd2	Gjd2	B2RQC6	Cad	5|0	2|1	-	2.5	1.27248	0.925145	0.34	0	0	na	na
Gjd2	Gjd2	Q9QZQ8	Macroh2a1	0|8	1|4	-	4	1.37002	0.839638	0.33	0	0	na	na
Gjd2	Gjd2	Q8C8R3	Ank2	5|1	3|0	-	3	1.45188	1.28173	0.31	0	0	na	na
Gjd2	Gjd2	Q9QWI6	Srcin1	2|0	0|1	-	1	1.25682	1.11133	0.28	0	0	na	na
Gjd2	Gjd2	O08674	Rbpjl	0|2	0|1	-	1	1.30052	1.13736	0.28	0	0	na	na
Gjd2	Gjd2	Q8VE97	Srsf4	0|2	0|1	-	1	1.30052	1.13736	0.28	0	0	na	na
Gjd2	Gjd2	P39053	Dnm1	2|0	1|0	-	1	1.24481	1.1007	0.28	0	0	na	na
Gjd2	Gjd2	Q8VDP2	Q8VDP2	0|2	0|1	-	1	1.30052	1.13736	0.28	0	0	na	na
Gjd2	Gjd2	Q60769	Tnfaip3	2|0	1|0	-	1	1.24481	1.1007	0.28	0	0	na	na
Gjd2	Gjd2	Q8CFG0	Sulf2	0|2	0|1	-	1	1.30052	1.13736	0.28	0	0	na	na
Gjd2	Gjd2	Q9D4J7	Phf6	0|2	0|1	-	1	1.30052	1.13736	0.28	0	0	na	na
Gjd2	Gjd2	Q9JME5	Ap3b2	2|1	0|1	-	1.5	1.57216	1.54851	0.28	0	0	na	na
Gjd2	Gjd2	Q99LC3	Q99LC3	2|0	1|0	-	1	1.24481	1.1007	0.28	0	0	na	na
Gjd2	Gjd2	Q3TV65	Q3TV65	1|2	0|1	-	1.5	1.59401	1.55794	0.28	0	0	na	na
Gjd2	Gjd2	Q6PDM2	Q6PDM2	0|2	0|1	-	1	1.30052	1.13736	0.28	0	0	na	na
Gjd2	Gjd2	Q91V61	Q91V61	2|0	1|0	-	1	1.24481	1.1007	0.28	0	0	na	na
Gjd2	Gjd2	P51612	P51612	0|2	0|1	-	1	1.30052	1.13736	0.28	0	0	na	na
Gjd2	Gjd2	Q60737	Q60737	0|2	0|1	-	1	1.30052	1.13736	0.28	0	0	na	na
Gjd2	Gjd2	Q07643	Q07643	2|1	0|1	-	1.5	1.57216	1.54851	0.28	0	0	na	na
Gjd2	Gjd2	P62900	P62900	0|2	0|1	-	1	1.30052	1.13736	0.28	0	0	na	na
Gjd2	Gjd2	Q3UHB8	Q3UHB8	0|2	0|1	-	1	1.30052	1.13736	0.28	0	0	na	na
Gjd2	Gjd2	Q99PV0	Q99PV0	0|2	0|1	-	1	1.30052	1.13736	0.28	0	0	na	na
Gjd2	Gjd2	A3KFM7	A3KFM7	0|20	0|12	-	10	1.50625	0.644009	0.27	0	0	na	na
Gjd2	Gjd2	Q6DIC0	Q6DIC0	0|6	0|4	-	3	1.28706	0.867755	0.26	0	0	na	na
Gjd2	Gjd2	Q8QZV6	Q8QZV6	0|3	0|2	-	1.5	1.21478	0.984826	0.25	0	0	na	na
Gjd2	Gjd2	A2APV2	A2APV2	0|3	0|2	-	1.5	1.21478	0.984826	0.25	0	0	na	na
Gjd2	Gjd2	P61358	P61358	9|2	5|1	-	5.5	1.46048	1.25619	0.25	0	0	na	na
Gjd2	Gjd2	Q3UQU0	Q3UQU0	0|3	0|2	-	1.5	1.21478	0.984826	0.25	0	0	na	na
Gjd2	Gjd2	Q9JMC8	Q9JMC8	0|3	0|2	-	1.5	1.21478	0.984826	0.25	0	0	na	na
Gjd2	Gjd2	Q9Z2E2	Q9Z2E2	0|3	0|2	-	1.5	1.21478	0.984826	0.25	0	0	na	na
Gjd2	Gjd2	O55187	O55187	0|3	0|2	-	1.5	1.21478	0.984826	0.25	0	0	na	na
Gjd2	Gjd2	Q14AX6	Q14AX6	0|3	0|2	-	1.5	1.21478	0.984826	0.25	0	0	na	na
Gjd2	Gjd2	O88569	O88569	3|0	1|1	-	1.5	1.15711	0.952388	0.24	0	0	na	na
Gjd2	Gjd2	Q8VCC9	Q8VCC9	0|7	0|5	-	3.5	1.23983	0.795251	0.21	0	0	na	na
Gjd2	Gjd2	O88491	O88491	0|7	0|5	-	3.5	1.23983	0.795251	0.21	0	0	na	na
Gjd2	Gjd2	Q8K0E8	Q8K0E8	3|3	3|0	-	3	1.47775	1.47724	0.21	0	0	na	na
Gjd2	Gjd2	Q61464	Q61464	0|4	0|3	-	2	1.16314	0.880768	0.21	0	0	na	na
Gjd2	Gjd2	Q3TKT4	Q3TKT4	0|7	0|5	-	3.5	1.23983	0.795251	0.21	0	0	na	na
Gjd2	Gjd2	Q8R5K4	Q8R5K4	0|4	0|3	-	2	1.16314	0.880768	0.21	0	0	na	na
Gjd2	Gjd2	Q6P4T2	Q6P4T2	1|15	0|10	-	8	1.43359	0.898446	0.19	0	0	na	na
Gjd2	Gjd2	P62281	P62281	4|13	2|7	-	8.5	1.62357	1.41325	0.19	0	0	na	na
Gjd2	Gjd2	P02463	P02463	9|5	3|4	-	7	1.62395	1.58495	0.18	0	0	na	na
Gjd2	Gjd2	Q5SUF2	Q5SUF2	0|8	0|6	-	4	1.20437	0.738117	0.17	0	0	na	na
Gjd2	Gjd2	O08553	O08553	5|2	4|0	-	3.5	1.36415	1.30032	0.17	0	0	na	na
Gjd2	Gjd2	Q9D415	Q9D415	5|0	3|1	-	2.5	1.05836	0.76947	0.16	0	0	na	na
Gjd2	Gjd2	Q80WS3	Q80WS3	0|2	0|2	-	1	0.977714	0.855054	0.12	0	0	na	na
Gjd2	Gjd2	P53569	P53569	0|2	0|2	-	1	0.977714	0.855054	0.12	0	0	na	na
Gjd2	Gjd2	Q9CRB2	Q9CRB2	0|2	0|2	-	1	0.977714	0.855054	0.12	0	0	na	na
Gjd2	Gjd2	P35550	P35550	2|0	2|0	-	1	0.931348	0.823533	0.12	0	0	na	na
Gjd2	Gjd2	Q62277	Q62277	2|0	2|0	-	1	0.931348	0.823533	0.12	0	0	na	na
Gjd2	Gjd2	Q7TQI8	Q7TQI8	0|2	0|2	-	1	0.977714	0.855054	0.12	0	0	na	na
Gjd2	Gjd2	Q7TNG8	Q7TNG8	0|2	0|2	-	1	0.977714	0.855054	0.12	0	0	na	na
Gjd2	Gjd2	Q9DBE9	Q9DBE9	2|0	2|0	-	1	0.931348	0.823533	0.12	0	0	na	na
Gjd2	Gjd2	Q6A0A9	Q6A0A9	3|4	0|4	-	3.5	1.41255	1.39953	0.11	0	0	na	na
Gjd2	Gjd2	Q61818	Q61818	0|3	0|3	-	1.5	0.973218	0.78899	0.1	0	0	na	na
Gjd2	Gjd2	P97452	P97452	2|1	1|1	-	1.5	1.17342	1.15577	0.1	0	0	na	na
Gjd2	Gjd2	Q925T6	Q925T6	1|2	1|1	-	1.5	1.18973	1.1628	0.1	0	0	na	na
Gjd2	Gjd2	Q80UP3	Q80UP3	0|3	0|3	-	1.5	0.973218	0.78899	0.1	0	0	na	na
Gjd2	Gjd2	Q9Z2Q2	Q9Z2Q2	2|1	1|1	-	1.5	1.17342	1.15577	0.1	0	0	na	na
Gjd2	Gjd2	Q9R0L7	Q9R0L7	2|0	1|1	-	1	0.938056	0.829465	0.1	0	0	na	na
Gjd2	Gjd2	Q8CDM1	Q8CDM1	2|3	2|1	-	2.5	1.31151	1.29397	0.09	0	0	na	na
Gjd2	Gjd2	Q0VBL3	Q0VBL3	0|7	0|6	-	3.5	1.08541	0.696201	0.09	0	0	na	na
Gjd2	Gjd2	Q8BXK8	Q8BXK8	0|15	0|11	-	7.5	1.25533	0.605562	0.09	0	0	na	na
Gjd2	Gjd2	Q68FD5	Q68FD5	7|0	5|1	-	3.5	1.00934	0.662868	0.08	0	0	na	na
Gjd2	Gjd2	Q05793	Hspg2	16|21	4|11	-	18.5	2.11766	2.09015	0.08	0	0	na	na
Gjd2	Gjd2	Q8BK35	Q8BK35	2|2	0|3	-	2	1.13683	1.13652	0.07	0	0	na	na
Gjd2	Gjd2	P68254	P68254	3|1	1|2	-	2	1.11717	1.06469	0.07	0	0	na	na
Gjd2	Gjd2	Q9WVG9	Q9WVG9	0|3	1|2	-	1.5	0.967595	0.78443	0.07	0	0	na	na
Gjd2	Gjd2	Q8K284	Q8K284	0|8	0|7	-	4	1.07098	0.656366	0.07	0	0	na	na
Gjd2	Gjd2	P62911	P62911	8|2	5|2	-	5	1.20441	1.06266	0.07	0	0	na	na
Gjd2	Gjd2	P25976	P25976	0|5	0|5	-	2.5	0.968065	0.689591	0.06	0	0	na	na
Gjd2	Gjd2	Q9D6Z1	Q9D6Z1	0|23	0|16	-	11.5	1.331	0.535626	0.06	0	0	na	na
Gjd2	Gjd2	Q8VDP4	Q8VDP4	4|1	2|2	-	2.5	1.07431	0.985713	0.05	0	0	na	na
Gjd2	Gjd2	Q04750	Q04750	0|14	0|11	-	7	1.18202	0.586408	0.05	0	0	na	na
Gjd2	Gjd2	P17809	P17809	4|1	2|2	-	2.5	1.07431	0.985713	0.05	0	0	na	na
Gjd2	Gjd2	Q6IFX2	Q6IFX2	9|6	8|0	-	7.5	1.53565	1.51964	0.05	0	0	na	na
Gjd2	Gjd2	P62717	P62717	9|2	6|2	-	5.5	1.17005	1.00638	0.04	0	0	na	na
Gjd2	Gjd2	E9Q5K9	E9Q5K9	0|6	0|6	-	3	0.966451	0.651595	0.04	0	0	na	na
Gjd2	Gjd2	Q00PI9	Q00PI9	3|10	3|6	-	6.5	1.28158	1.12202	0.04	0	0	na	na
Gjd2	Gjd2	Q8CI03	Q8CI03	3|5	1|4	-	4	1.34189	1.30821	0.04	0	0	na	na
Gjd2	Gjd2	Q9R1C7	Q9R1C7	0|5	1|4	-	2.5	0.964056	0.686735	0.04	0	0	na	na
Gjd2	Gjd2	Q9Z2A5	Q9Z2A5	2|2	1|2	-	2	1.13026	1.12995	0.04	0	0	na	na
Gjd2	Gjd2	P62918	P62918	10|2	6|3	-	6	1.14496	0.960689	0.04	0	0	na	na
Gjd2	Gjd2	P10854	P10854	0|9	0|8	-	4.5	1.05942	0.622668	0.04	0	0	na	na
Gjd2	Gjd2	P47964	P47964	2|2	2|1	-	2	1.12376	1.12346	0.04	0	0	na	na
Gjd2	Gjd2	Q69ZA1	Q69ZA1	0|7	0|7	-	3.5	0.965194	0.619092	0.03	0	0	na	na
Gjd2	Gjd2	Q80WV7	Q80WV7	0|7	0|7	-	3.5	0.965194	0.619092	0.03	0	0	na	na
Gjd2	Gjd2	P19253	P19253	15|4	11|1	-	9.5	1.33678	1.16081	0.03	0	0	na	na
Gjd2	Gjd2	Q8C176	Q8C176	0|3	0|4	-	1.5	0.811791	0.65812	0.03	0	0	na	na
Gjd2	Gjd2	Q8C1S0	Q8C1S0	1|2	0|3	-	1.5	0.960058	0.938333	0.03	0	0	na	na
Gjd2	Gjd2	Q8VH51	Q8VH51	0|2	0|3	-	1	0.783292	0.685024	0.03	0	0	na	na
Gjd2	Gjd2	Q7TNC4	Q7TNC4	0|10	0|9	-	5	1.04997	0.59368	0.03	0	0	na	na
Gjd2	Gjd2	Q8BZH4	Q8BZH4	0|2	0|3	-	1	0.783292	0.685024	0.03	0	0	na	na
Gjd2	Gjd2	Q569Z6	Q569Z6	0|2	0|3	-	1	0.783292	0.685024	0.03	0	0	na	na
Gjd2	Gjd2	O54781	O54781	0|2	0|3	-	1	0.783292	0.685024	0.03	0	0	na	na
Gjd2	Gjd2	A2BE28	A2BE28	0|7	0|7	-	3.5	0.965194	0.619092	0.03	0	0	na	na
Gjd2	Gjd2	P47857	P47857	3|0	4|0	-	1.5	0.764043	0.628865	0.03	0	0	na	na
Gjd2	Gjd2	Q9D3A8	Q9D3A8	12|6	4|7	-	9	1.40172	1.35048	0.02	0	0	na	na
Gjd2	Gjd2	P62892	P62892	2|1	2|1	-	1.5	0.936018	0.92194	0.02	0	0	na	na
Gjd2	Gjd2	Q9CR57	Q9CR57	1|2	1|2	-	1.5	0.954511	0.93291	0.02	0	0	na	na
Gjd2	Gjd2	Q8BVE8	Q8BVE8	0|4	0|5	-	2	0.83218	0.630152	0.02	0	0	na	na
Gjd2	Gjd2	Q80Y44	Q80Y44	0|5	0|6	-	2.5	0.847491	0.603701	0.02	0	0	na	na
Gjd2	Gjd2	Q5HZG4	Q5HZG4	0|8	0|8	-	4	0.964188	0.590918	0.02	0	0	na	na
Gjd2	Gjd2	Q9ESV0	Q9ESV0	0|5	0|6	-	2.5	0.847491	0.603701	0.02	0	0	na	na
Gjd2	Gjd2	Q8R5C8	Q8R5C8	0|4	0|5	-	2	0.83218	0.630152	0.02	0	0	na	na
Gjd2	Gjd2	O35927	O35927	3|0	2|2	-	1.5	0.77138	0.634904	0.01	0	0	na	na
Gjd2	Gjd2	P60335	P60335	5|3	2|4	-	4	1.15475	1.13812	0.01	0	0	na	na
Gjd2	Gjd2	Q9D7Z3	Q9D7Z3	1|4	2|3	-	2.5	0.950742	0.856051	0.01	0	0	na	na
Gjd2	Gjd2	Q9QYR6	Q9QYR6	3|2	2|2	-	2.5	1.08518	1.07804	0.01	0	0	na	na
Gjd2	Gjd2	G5E8B9	G5E8B9	1|12	1|10	-	6.5	1.10116	0.746349	0.01	0	0	na	na
Gjd2	Gjd2	Q9D823	Q9D823	2|3	2|2	-	2.5	1.09606	1.0814	0.01	0	0	na	na
Gjd2	Gjd2	Q9QWL7	Q9QWL7	12|0	11|0	-	6	0.950984	0.515697	0.01	0	0	na	na
Gjd2	Gjd2	Q9ERD7	Q9ERD7	40|15	28|0	-	27.5	1.68289	1.53572	0.01	0	0	na	na
Gjd2	Gjd2	Q9JIS5	Q9JIS5	4|2	3|2	-	3	1.05315	1.02745	0.01	0	0	na	na
Gjd2	Gjd2	O09167	O09167	5|1	5|1	-	3	0.908697	0.8022	0.01	0	0	na	na
Gjd2	Gjd2	Q9Z103	Q9Z103	2|10	0|10	-	6	1.11048	0.903087	0.01	0	0	na	na
Gjd2	Gjd2	O35613	O35613	0|13	0|12	-	6.5	1.02968	0.526219	0.01	0	0	na	na
Gjd2	Gjd2	B1AZP2	B1AZP2	5|4	2|4	-	4.5	1.27285	1.27051	0.01	0	0	na	na
Gjd2	Gjd2	Q62318	Q62318	3|5	2|4	-	4	1.17112	1.14172	0.01	0	0	na	na
Gjd2	Gjd2	Q8BPA8	Q8BPA8	1|0	0|0	-	0.5	1.43815	1.36978	0	0	0	na	na
Gjd2	Gjd2	Q5SWU9	Q5SWU9	900|479	878|524	-	689.5	0.881001	0.847797	0	0	0	na	na
Gjd2	Gjd2	Q810T2	Q810T2	0|1	0|0	-	0.5	1.47077	1.39339	0	0	0	na	na
Gjd2	Gjd2	Q02526	Q02526	1|0	0|0	-	0.5	1.43815	1.36978	0	0	0	na	na
Gjd2	Gjd2	Q3V1M1	Q3V1M1	1|0	0|0	-	0.5	1.43815	1.36978	0	0	0	na	na
Gjd2	Gjd2	P68369	P68369	53|19	48|17	-	36	0.983301	0.88753	0	0	0	na	na
Gjd2	Gjd2	P10922	P10922	23|7	27|6	-	15	0.814114	0.717779	0	0	0	na	na
Gjd2	Gjd2	Q3UUE9	Q3UUE9	0|1	0|0	-	0.5	1.47077	1.39339	0	0	0	na	na
Gjd2	Gjd2	P10493	P10493	1|1	0|0	-	1	1.90892	1.90864	0	0	0	na	na
Gjd2	Gjd2	P14115	P14115	29|10	25|11	-	19.5	0.963861	0.868179	0	0	0	na	na
Gjd2	Gjd2	A6H690	A6H690	1|0	0|0	-	0.5	1.43815	1.36978	0	0	0	na	na
Gjd2	Gjd2	Q8CH25	Q8CH25	0|1	0|1	-	0.5	0.985178	0.933347	0	0	0	na	na
Gjd2	Gjd2	P99024	P99024	66|27	55|33	-	46.5	0.943795	0.872923	0	0	0	na	na
Gjd2	Gjd2	Q6P5D4	Q6P5D4	0|1	0|0	-	0.5	1.47077	1.39339	0	0	0	na	na
Gjd2	Gjd2	P62751	P62751	26|10	30|12	-	18	0.772553	0.711084	0	0	0	na	na
Gjd2	Gjd2	Q8C6B9	Q8C6B9	1|3	2|6	-	2	0.573303	0.538784	0	0	0	na	na
Gjd2	Gjd2	P61979	P61979	1|4	2|5	-	2.5	0.741495	0.667644	0	0	0	na	na
Gjd2	Gjd2	P10126	P10126	5|4	6|2	-	4.5	1.00879	1.00693	0	0	0	na	na
Gjd2	Gjd2	Q8CFZ4	Q8CFZ4	1|0	0|0	-	0.5	1.43815	1.36978	0	0	0	na	na
Gjd2	Gjd2	Q8CB62	Q8CB62	0|1	0|0	-	0.5	1.47077	1.39339	0	0	0	na	na
Gjd2	Gjd2	Q9WUD1	Q9WUD1	1|0	0|0	-	0.5	1.43815	1.36978	0	0	0	na	na
Gjd2	Gjd2	Q8VDH1	Q8VDH1	1|0	0|0	-	0.5	1.43815	1.36978	0	0	0	na	na
Gjd2	Gjd2	O54962	O54962	0|1	0|1	-	0.5	0.985178	0.933347	0	0	0	na	na
Gjd2	Gjd2	Q60930	Q60930	1|0	0|0	-	0.5	1.43815	1.36978	0	0	0	na	na
Gjd2	Gjd2	P68368	P68368	41|15	40|0	-	28	1.22231	1.10989	0	0	0	na	na
Gjd2	Gjd2	Q62108	Q62108	15|6	11|4	-	10.5	1.21573	1.13401	0	0	0	na	na
Gjd2	Gjd2	Q8C0P7	Q8C0P7	0|1	0|0	-	0.5	1.47077	1.39339	0	0	0	na	na
Gjd2	Gjd2	P35980	P35980	1|0	1|0	-	0.5	0.954121	0.908762	0	0	0	na	na
Gjd2	Gjd2	Q6PHS6	Q6PHS6	0|1	0|0	-	0.5	1.47077	1.39339	0	0	0	na	na
Gjd2	Gjd2	P70168	P70168	1|0	1|0	-	0.5	0.954121	0.908762	0	0	0	na	na
Gjd2	Gjd2	Q8K2K6	Q8K2K6	1|0	0|0	-	0.5	1.43815	1.36978	0	0	0	na	na
Gjd2	Gjd2	P48962	P48962	15|5	13|7	-	10	0.898677	0.813485	0	0	0	na	na
Gjd2	Gjd2	Q9DA19	Q9DA19	1|0	0|1	-	0.5	0.963328	0.917532	0	0	0	na	na
Gjd2	Gjd2	A2A8L1	A2A8L1	0|6	0|8	-	3	0.773716	0.52165	0	0	0	na	na
Gjd2	Gjd2	Q8CGI1	Q8CGI1	1|0	0|0	-	0.5	1.43815	1.36978	0	0	0	na	na
Gjd2	Gjd2	P35969	P35969	0|4	1|5	-	2	0.725889	0.549664	0	0	0	na	na
Gjd2	Gjd2	Q5NCI0	Q5NCI0	1|0	0|0	-	0.5	1.43815	1.36978	0	0	0	na	na
Gjd2	Gjd2	P14873	P14873	13|11	9|7	-	12	1.31704	1.31578	0	0	0	na	na
Gjd2	Gjd2	Q5SYL3	Q5SYL3	0|1	0|0	-	0.5	1.47077	1.39339	0	0	0	na	na
Gjd2	Gjd2	Q8BQM7	Q8BQM7	0|1	0|0	-	0.5	1.47077	1.39339	0	0	0	na	na
Gjd2	Gjd2	P56716	P56716	4|7	3|6	-	5.5	1.10379	1.06727	0	0	0	na	na
Gjd2	Gjd2	Q8VI64	Q8VI64	1|0	0|0	-	0.5	1.43815	1.36978	0	0	0	na	na
Gjd2	Gjd2	Q9D0F4	Q9D0F4	0|3	0|8	-	1.5	0.488007	0.395628	0	0	0	na	na
Gjd2	Gjd2	Q8CJ40	Q8CJ40	1|0	0|0	-	0.5	1.43815	1.36978	0	0	0	na	na
Gjd2	Gjd2	D3YXK2	D3YXK2	5|4	4|5	-	4.5	0.923572	0.921872	0	0	0	na	na
Gjd2	Gjd2	Q61033	Q61033	1|0	0|0	-	0.5	1.43815	1.36978	0	0	0	na	na
Gjd2	Gjd2	Q5DTT2	Q5DTT2	0|1	1|3	-	0.5	0.492556	0.466642	0	0	0	na	na
Gjd2	Gjd2	Q9EQW7	Q9EQW7	0|1	0|0	-	0.5	1.47077	1.39339	0	0	0	na	na
Gjd2	Gjd2	P14733	P14733	1|0	1|0	-	0.5	0.954121	0.908762	0	0	0	na	na
Gjd2	Gjd2	Q9Z282	Q9Z282	0|1	0|0	-	0.5	1.47077	1.39339	0	0	0	na	na
Gjd2	Gjd2	B1AY13	B1AY13	1|0	0|0	-	0.5	1.43815	1.36978	0	0	0	na	na
Gjd2	Gjd2	Q8BSQ9	Q8BSQ9	0|5	0|8	-	2.5	0.67848	0.483308	0	0	0	na	na
Gjd2	Gjd2	Q80UG8	Q80UG8	0|1	0|0	-	0.5	1.47077	1.39339	0	0	0	na	na
Gjd2	Gjd2	Q9QXK3	Q9QXK3	1|0	1|0	-	0.5	0.954121	0.908762	0	0	0	na	na
Gjd2	Gjd2	Q91XU3	Q91XU3	6|5	5|6	-	5.5	0.921287	0.920313	0	0	0	na	na
Gjd2	Gjd2	P62754	P62754	54|23	65|29	-	38.5	0.735213	0.685463	0	0	0	na	na
Gjd2	Gjd2	Q9CWL2	Q9CWL2	1|8	1|10	-	4.5	0.808589	0.621655	0	0	0	na	na
Gjd2	Gjd2	Q99K48	Q99K48	1|0	1|0	-	0.5	0.954121	0.908762	0	0	0	na	na
Gjd2	Gjd2	P41105	P41105	11|5	10|4	-	8	1.01602	0.968682	0	0	0	na	na
Gjd2	Gjd2	P62806	P62806	3|2	8|3	-	2.5	0.498077	0.494799	0	0	0	na	na
Gjd2	Gjd2	Q9WUS4	Q9WUS4	1|1	0|0	-	1	1.90892	1.90864	0	0	0	na	na
Gjd2	Gjd2	A2AR02	A2AR02	0|10	0|11	-	5	0.88879	0.502546	0	0	0	na	na
Gjd2	Gjd2	Q8BGV5	Q8BGV5	1|0	0|0	-	0.5	1.43815	1.36978	0	0	0	na	na
Gjd2	Gjd2	P12382	P12382	17|11	16|7	-	14	1.08434	1.06919	0	0	0	na	na
Gjd2	Gjd2	Q80XI4	Q80XI4	12|8	12|8	-	10	0.908722	0.898605	0	0	0	na	na
Gjd2	Gjd2	Q80XI3	Q80XI3	1|1	2|1	-	1	0.761282	0.761171	0	0	0	na	na
Gjd2	Gjd2	P62196	P62196	1|0	1|0	-	0.5	0.954121	0.908762	0	0	0	na	na
Gjd2	Gjd2	Q3U9G9	Q3U9G9	0|1	0|0	-	0.5	1.47077	1.39339	0	0	0	na	na
Gjd2	Gjd2	Q8CHP0	Q8CHP0	0|1	0|0	-	0.5	1.47077	1.39339	0	0	0	na	na
Gjd2	Gjd2	Q61245	Q61245	0|1	1|0	-	0.5	0.975762	0.924426	0	0	0	na	na
Gjd2	Gjd2	Q925I1	Q925I1	1|0	0|0	-	0.5	1.43815	1.36978	0	0	0	na	na
Gjd2	Gjd2	B2RWS6	B2RWS6	0|1	0|0	-	0.5	1.47077	1.39339	0	0	0	na	na
Gjd2	Gjd2	E9PVX6	E9PVX6	1|0	0|0	-	0.5	1.43815	1.36978	0	0	0	na	na
Gjd2	Gjd2	P25444	P25444	8|11	5|8	-	9.5	1.29466	1.27519	0	0	0	na	na
Gjd2	Gjd2	Q62445	Q62445	1|0	0|0	-	0.5	1.43815	1.36978	0	0	0	na	na
Gjd2	Gjd2	Q91YK2	Q91YK2	9|46	6|43	-	27.5	1.0539	0.786254	0	0	0	na	na
Gjd2	Gjd2	Q3UYV9	Q3UYV9	0|1	0|2	-	0.5	0.740645	0.701679	0	0	0	na	na
Gjd2	Gjd2	Q5DU25	Q5DU25	6|0	6|5	-	3	0.55758	0.384364	0	0	0	na	na
Gjd2	Gjd2	Q505D9	Q505D9	1|0	0|0	-	0.5	1.43815	1.36978	0	0	0	na	na
Gjd2	Gjd2	Q9WUX5	Q9WUX5	0|1	0|0	-	0.5	1.47077	1.39339	0	0	0	na	na
Gjd2	Gjd2	Q99NB9	Q99NB9	1|0	0|0	-	0.5	1.43815	1.36978	0	0	0	na	na
Gjd2	Gjd2	P51450	P51450	0|1	0|0	-	0.5	1.47077	1.39339	0	0	0	na	na
Gjd2	Gjd2	O70325	O70325	0|1	1|2	-	0.5	0.589936	0.558899	0	0	0	na	na
Gjd2	Gjd2	P62264	P62264	1|1	1|1	-	1	0.954364	0.954224	0	0	0	na	na
Gjd2	Gjd2	Q9D937	Q9D937	2|1	3|2	-	1.5	0.669118	0.659055	0	0	0	na	na
Gjd2	Gjd2	Q80T69	Q80T69	18|29	16|23	-	23.5	1.10196	1.0653	0	0	0	na	na
Gjd2	Gjd2	P48755	P48755	0|1	0|0	-	0.5	1.47077	1.39339	0	0	0	na	na
Gjd2	Gjd2	P47962	P47962	1|0	0|0	-	0.5	1.43815	1.36978	0	0	0	na	na
Gjd2	Gjd2	P47963	P47963	26|19	31|17	-	22.5	0.849869	0.84426	0	0	0	na	na
Gjd2	Gjd2	Q8BKA3	Q8BKA3	0|4	0|7	-	2	0.647842	0.490565	0	0	0	na	na
Gjd2	Gjd2	Q9D8E6	Q9D8E6	15|12	7|10	-	13.5	1.39466	1.39125	0	0	0	na	na
Gjd2	Gjd2	Q8CDN6	Q8CDN6	1|0	3|0	-	0.5	0.570262	0.543152	0	0	0	na	na
Gjd2	Gjd2	P42669	P42669	0|1	0|1	-	0.5	0.985178	0.933347	0	0	0	na	na
Gjd2	Gjd2	Q99PG4	Q99PG4	0|1	0|0	-	0.5	1.47077	1.39339	0	0	0	na	na
Gjd2	Gjd2	Q6PIC6	Q6PIC6	31|14	30|11	-	22.5	0.978395	0.923511	0	0	0	na	na
Gjd2	Gjd2	E9Q0C6	E9Q0C6	1|0	0|0	-	0.5	1.43815	1.36978	0	0	0	na	na
Gjd2	Gjd2	Q68FM6	Q68FM6	1|0	0|0	-	0.5	1.43815	1.36978	0	0	0	na	na
Gjd2	Gjd2	O70309	O70309	0|1	0|0	-	0.5	1.47077	1.39339	0	0	0	na	na
Gjd2	Gjd2	Q50H33	Q50H33	0|1	0|0	-	0.5	1.47077	1.39339	0	0	0	na	na
Gjd2	Gjd2	P61211	P61211	1|0	0|0	-	0.5	1.43815	1.36978	0	0	0	na	na
Gjd2	Gjd2	Q9CQD7	Q9CQD7	1|0	0|0	-	0.5	1.43815	1.36978	0	0	0	na	na
Gjd2	Gjd2	Q8CC88	Q8CC88	1|0	2|0	-	0.5	0.713861	0.679924	0	0	0	na	na
Gjd2	Gjd2	Q9Z2I9	Q9Z2I9	1|0	3|0	-	0.5	0.570262	0.543152	0	0	0	na	na
Gjd2	Gjd2	P97386	P97386	0|1	0|0	-	0.5	1.47077	1.39339	0	0	0	na	na
Gjd2	Gjd2	Q9ESL0	Q9ESL0	1|0	0|0	-	0.5	1.43815	1.36978	0	0	0	na	na
Gjd2	Gjd2	P17012	P17012	0|5	1|8	-	2.5	0.61533	0.438324	0	0	0	na	na
Gjd2	Gjd2	Q8K019	Q8K019	0|3	0|6	-	1.5	0.609571	0.494181	0	0	0	na	na
Gjd2	Gjd2	O35691	O35691	2|4	1|7	-	3	0.758308	0.73061	0	0	0	na	na
Gjd2	Gjd2	Q5RJ54	Q5RJ54	1|0	0|0	-	0.5	1.43815	1.36978	0	0	0	na	na
Gjd2	Gjd2	Q9WUA3	Q9WUA3	16|4	14|3	-	10	1.03262	0.883125	0	0	0	na	na
Gjd2	Gjd2	Q91VS8	Q91VS8	0|14	1|18	-	7	0.731327	0.362816	0	0	0	na	na
Gjd2	Gjd2	Q8C1A5	Q8C1A5	1|0	0|0	-	0.5	1.43815	1.36978	0	0	0	na	na
Gjd2	Gjd2	Q8C854	Q8C854	1|0	0|0	-	0.5	1.43815	1.36978	0	0	0	na	na
Gjd2	Gjd2	Q80WJ7	Q80WJ7	0|1	0|0	-	0.5	1.47077	1.39339	0	0	0	na	na
Gjd2	Gjd2	Q80TR1	Q80TR1	1|0	0|0	-	0.5	1.43815	1.36978	0	0	0	na	na
Gjd2	Gjd2	Q8CG16	Q8CG16	1|0	0|0	-	0.5	1.43815	1.36978	0	0	0	na	na
Gjd2	Gjd2	Q61644	Q61644	0|1	0|0	-	0.5	1.47077	1.39339	0	0	0	na	na
Gjd2	Gjd2	P70180	P70180	0|1	0|0	-	0.5	1.47077	1.39339	0	0	0	na	na
Gjd2	Gjd2	Q9QZE7	Q9QZE7	0|1	0|1	-	0.5	0.985178	0.933347	0	0	0	na	na
Gjd2	Gjd2	Q8CDG3	Q8CDG3	1|0	0|0	-	0.5	1.43815	1.36978	0	0	0	na	na
Gjd2	Gjd2	Q5SW19	Q5SW19	1|0	0|0	-	0.5	1.43815	1.36978	0	0	0	na	na
Gjd2	Gjd2	Q99PT3	Q99PT3	0|1	0|1	-	0.5	0.985178	0.933347	0	0	0	na	na
Gjd2	Gjd2	Q9DBT5	Q9DBT5	2|7	2|8	-	4.5	0.868055	0.767237	0	0	0	na	na
Gjd2	Gjd2	E9QAT4	E9QAT4	0|1	0|0	-	0.5	1.47077	1.39339	0	0	0	na	na
Gjd2	Gjd2	Q9WTJ4	Q9WTJ4	0|1	0|0	-	0.5	1.47077	1.39339	0	0	0	na	na
Gjd2	Gjd2	Q9ES28	Q9ES28	1|0	0|0	-	0.5	1.43815	1.36978	0	0	0	na	na
Gjd2	Gjd2	Q05920	Q05920	590|299	577|321	-	444.5	0.885679	0.846489	0	0	0	na	na
Gjd2	Gjd2	Q8R526	Q8R526	0|1	0|0	-	0.5	1.47077	1.39339	0	0	0	na	na
Gjd2	Gjd2	Q6ZWV7	Q6ZWV7	21|7	32|8	-	14	0.637324	0.573069	0	0	0	na	na
Gjd2	Gjd2	Q8BXR9	Q8BXR9	0|11	0|17	-	5.5	0.658737	0.359304	0	0	0	na	na
Gjd2	Gjd2	P02535	P02535	18|11	17|5	-	14.5	1.1635	1.14173	0	0	0	na	na
Gjd2	Gjd2	Q921F2	Q921F2	1|0	1|0	-	0.5	0.954121	0.908762	0	0	0	na	na
Gjd2	Gjd2	Q78DX7	Q78DX7	1|0	0|0	-	0.5	1.43815	1.36978	0	0	0	na	na
Gjd2	Gjd2	Q8BUI3	Q8BUI3	0|1	0|0	-	0.5	1.47077	1.39339	0	0	0	na	na
Gjd2	Gjd2	Q8CDU5	Q8CDU5	0|1	0|0	-	0.5	1.47077	1.39339	0	0	0	na	na
Gjd2	Gjd2	Q6ZWR4	Q6ZWR4	1|0	0|0	-	0.5	1.43815	1.36978	0	0	0	na	na
Gjd2	Gjd2	P62849	P62849	9|2	8|4	-	5.5	0.837109	0.720016	0	0	0	na	na
Gjd2	Gjd2	Q91VE6	Q91VE6	2|2	3|3	-	2	0.704353	0.704165	0	0	0	na	na
Gjd2	Gjd2	Q9QYM8	Q9QYM8	0|1	0|1	-	0.5	0.985178	0.933347	0	0	0	na	na
Gjd2	Gjd2	Q9CX11	Q9CX11	4|0	5|2	-	2	0.608671	0.469349	0	0	0	na	na
Gjd2	Gjd2	Q69ZW3	Q69ZW3	1|0	0|0	-	0.5	1.43815	1.36978	0	0	0	na	na
Gjd2	Gjd2	Q3ULD5	Q3ULD5	9|6	9|4	-	7.5	1.0306	1.01986	0	0	0	na	na
Gjd2	Gjd2	Q80Z37	Q80Z37	0|1	0|0	-	0.5	1.47077	1.39339	0	0	0	na	na
Gjd2	Gjd2	P20664	P20664	0|1	0|0	-	0.5	1.47077	1.39339	0	0	0	na	na
Gjd2	Gjd2	Q3UV17	Q3UV17	6|6	8|5	-	6	0.857848	0.857453	0	0	0	na	na
Gjd2	Gjd2	P11103	P11103	0|1	0|1	-	0.5	0.985178	0.933347	0	0	0	na	na
Gjd2	Gjd2	Q8CGM2	Q8CGM2	0|1	0|0	-	0.5	1.47077	1.39339	0	0	0	na	na
Gjd2	Gjd2	Q61136	Q61136	0|26	0|32	-	13	0.789378	0.300951	0	0	0	na	na
Gjd2	Gjd2	A6H619	A6H619	0|8	0|10	-	4	0.803875	0.492667	0	0	0	na	na
Gjd2	Gjd2	Q8CGC7	Q8CGC7	1|0	0|0	-	0.5	1.43815	1.36978	0	0	0	na	na
Gjd2	Gjd2	P40749	P40749	0|1	0|0	-	0.5	1.47077	1.39339	0	0	0	na	na
Gjd2	Gjd2	P35601	P35601	0|11	0|13	-	5.5	0.834064	0.454935	0	0	0	na	na
Gjd2	Gjd2	Q8BJL0	Q8BJL0	0|1	0|0	-	0.5	1.47077	1.39339	0	0	0	na	na
Gjd2	Gjd2	Q8R4H7	Q8R4H7	1|0	0|0	-	0.5	1.43815	1.36978	0	0	0	na	na
Gjd2	Gjd2	O35737	O35737	2|5	3|5	-	3.5	0.848337	0.794905	0	0	0	na	na
Gjd2	Gjd2	Q9ESZ8	Q9ESZ8	1|0	0|0	-	0.5	1.43815	1.36978	0	0	0	na	na
Gjd2	Gjd2	Q8K2H1	Q8K2H1	0|1	0|0	-	0.5	1.47077	1.39339	0	0	0	na	na
Gjd2	Gjd2	Q9D4C5	Q9D4C5	1|0	0|0	-	0.5	1.43815	1.36978	0	0	0	na	na
Gjd2	Gjd2	Q5SRX1	Q5SRX1	1|0	0|0	-	0.5	1.43815	1.36978	0	0	0	na	na
Gjd2	Gjd2	Q99P91	Q99P91	0|1	1|0	-	0.5	0.975762	0.924426	0	0	0	na	na
Gjd2	Gjd2	Q91ZW3	Q91ZW3	0|42	0|45	-	21	0.896116	0.274692	0	0	0	na	na
Gjd2	Gjd2	O08580	O08580	1|0	1|0	-	0.5	0.954121	0.908762	0	0	0	na	na
Gjd2	Gjd2	Q8C3X4	Q8C3X4	1|0	0|0	-	0.5	1.43815	1.36978	0	0	0	na	na
Gjd2	Gjd2	Q5XG69	Q5XG69	1|1	0|0	-	1	1.90892	1.90864	0	0	0	na	na
Gjd2	Gjd2	Q62028	Q62028	0|1	0|0	-	0.5	1.47077	1.39339	0	0	0	na	na
Gjd2	Gjd2	Q6PFD5	Q6PFD5	1|1	1|1	-	1	0.954364	0.954224	0	0	0	na	na
Gjd2	Gjd2	A2AJI0	A2AJI0	0|1	0|2	-	0.5	0.740645	0.701679	0	0	0	na	na
Gjd2	Gjd2	Q62187	Q62187	5|6	1|13	-	5.5	0.759999	0.755768	0	0	0	na	na
Gjd2	Gjd2	P84099	P84099	30|11	37|14	-	20.5	0.724499	0.660067	0	0	0	na	na
Gjd2	Gjd2	Q8K4Q8	Q8K4Q8	1|0	0|0	-	0.5	1.43815	1.36978	0	0	0	na	na
Gjd2	Gjd2	Q6PAL7	Q6PAL7	0|22	0|21	-	11	1.00054	0.410526	0	0	0	na	na
Gjd2	Gjd2	Q8CES0	Q8CES0	1|0	0|0	-	0.5	1.43815	1.36978	0	0	0	na	na
Gjd2	Gjd2	Q80YD1	Q80YD1	1|0	0|0	-	0.5	1.43815	1.36978	0	0	0	na	na
Gjd2	Gjd2	Q9QXL1	Q9QXL1	1|0	0|0	-	0.5	1.43815	1.36978	0	0	0	na	na
Gjd2	Gjd2	Q06180	Q06180	1|0	0|0	-	0.5	1.43815	1.36978	0	0	0	na	na
Gjd2	Gjd2	O08665	O08665	1|0	0|0	-	0.5	1.43815	1.36978	0	0	0	na	na
Gjd2	Gjd2	P02301	P02301	1|4	3|6	-	2.5	0.606141	0.545771	0	0	0	na	na
Gjd2	Gjd2	Q9CQE0	Q9CQE0	0|1	0|0	-	0.5	1.47077	1.39339	0	0	0	na	na
Gjd2	Gjd2	Q6ZWV3	Q6ZWV3	20|18	19|17	-	19	0.958925	0.958804	0	0	0	na	na
Gjd2	Gjd2	P13516	P13516	1|0	0|0	-	0.5	1.43815	1.36978	0	0	0	na	na
Gjd2	Gjd2	Q60847	Q60847	1|0	0|0	-	0.5	1.43815	1.36978	0	0	0	na	na
Gjd2	Gjd2	O54774	O54774	1|11	1|17	-	6	0.669254	0.466913	0	0	0	na	na
Gjd2	Gjd2	P48193	P48193	2|6	1|10	-	4	0.730378	0.664695	0	0	0	na	na
Gjd2	Gjd2	E9PZM4	E9PZM4	0|22	0|37	-	11	0.590363	0.242229	0	0	0	na	na
Gjd2	Gjd2	E9Q7G0	E9Q7G0	0|93	2|87	-	46.5	0.997436	0.20961	0	0	0	na	na
Gjd2	Gjd2	Q8VBW5	Q8VBW5	0|1	0|1	-	0.5	0.985178	0.933347	0	0	0	na	na
Gjd2	Gjd2	P55200	P55200	0|61	1|60	-	30.5	0.956108	0.245943	0	0	0	na	na
Gjd2	Gjd2	P42932	P42932	35|22	32|20	-	28.5	0.985254	0.967966	0	0	0	na	na
Gjd2	Gjd2	Q6PFR5	Q6PFR5	0|1	0|0	-	0.5	1.47077	1.39339	0	0	0	na	na
Gjd2	Gjd2	Q61097	Q61097	0|1	0|0	-	0.5	1.47077	1.39339	0	0	0	na	na
Gjd2	Gjd2	P01029	P01029	0|1	0|0	-	0.5	1.47077	1.39339	0	0	0	na	na
Gjd2	Gjd2	Q61702	Q61702	0|1	0|0	-	0.5	1.47077	1.39339	0	0	0	na	na
Gjd2	Gjd2	O88665	O88665	4|6	2|8	-	5	0.936122	0.918667	0	0	0	na	na
Gjd2	Gjd2	P35294	P35294	1|0	0|0	-	0.5	1.43815	1.36978	0	0	0	na	na
Gjd2	Gjd2	Q9EPC2	Q9EPC2	0|1	0|0	-	0.5	1.47077	1.39339	0	0	0	na	na
Gjd2	Gjd2	A2AIV2	A2AIV2	0|7	0|12	-	3.5	0.62119	0.398442	0	0	0	na	na
Gjd2	Gjd2	Q8C5T8	Q8C5T8	0|1	0|1	-	0.5	0.985178	0.933347	0	0	0	na	na
Gjd2	Gjd2	P56546	P56546	10|17	6|12	-	13.5	1.34402	1.29389	0	0	0	na	na
Gjd2	Gjd2	Q9DCA5	Q9DCA5	1|0	0|0	-	0.5	1.43815	1.36978	0	0	0	na	na
Gjd2	Gjd2	P29974	P29974	3|38	2|26	-	20.5	1.36236	0.779014	0	0	0	na	na
Gjd2	Gjd2	Q9R1C6	Q9R1C6	1|0	1|0	-	0.5	0.954121	0.908762	0	0	0	na	na
Gjd2	Gjd2	Q61315	Q61315	1|0	0|0	-	0.5	1.43815	1.36978	0	0	0	na	na
Gjd2	Gjd2	Q9Z2X1	Q9Z2X1	5|0	3|4	-	2.5	0.710081	0.516258	0	0	0	na	na
Gjd2	Gjd2	P0CL69	P0CL69	0|1	0|0	-	0.5	1.47077	1.39339	0	0	0	na	na
Gjd2	Gjd2	Q9Z2U2	Q9Z2U2	0|18	0|18	-	9	0.959654	0.429133	0	0	0	na	na
Gjd2	Gjd2	Q641K1	Q641K1	0|1	0|0	-	0.5	1.47077	1.39339	0	0	0	na	na
Gjd2	Gjd2	P97820	P97820	0|1	0|0	-	0.5	1.47077	1.39339	0	0	0	na	na
Gjd2	Gjd2	Q9CWK8	Q9CWK8	0|1	0|0	-	0.5	1.47077	1.39339	0	0	0	na	na
Gjd2	Gjd2	Q6PDQ2	Q6PDQ2	0|8	0|13	-	4	0.643409	0.394323	0	0	0	na	na
Gjd2	Gjd2	Q8BGS1	Q8BGS1	21|30	11|26	-	25.5	1.25411	1.22816	0	0	0	na	na
Gjd2	Gjd2	Q8K4S1	Q8K4S1	0|1	0|0	-	0.5	1.47077	1.39339	0	0	0	na	na
Gjd2	Gjd2	Q61414	Q61414	0|6	13|0	-	3	0.503574	0.339516	0	0	0	na	na
Gjd2	Gjd2	Q8BQ30	Q8BQ30	1|0	0|0	-	0.5	1.43815	1.36978	0	0	0	na	na
Gjd2	Gjd2	Q8BVK9	Q8BVK9	1|0	0|0	-	0.5	1.43815	1.36978	0	0	0	na	na
Gjd2	Gjd2	Q9JIX8	Q9JIX8	6|7	1|12	-	6.5	0.932932	0.9286	0	0	0	na	na
Gjd2	Gjd2	Q9ESC8	Q9ESC8	0|1	0|0	-	0.5	1.47077	1.39339	0	0	0	na	na
Gjd2	Gjd2	Q91VN6	Q91VN6	1|4	0|7	-	2.5	0.746296	0.671967	0	0	0	na	na
Gjd2	Gjd2	P26618	P26618	1|0	0|0	-	0.5	1.43815	1.36978	0	0	0	na	na
Gjd2	Gjd2	Q8VEM8	Q8VEM8	5|2	5|2	-	3.5	0.913756	0.871002	0	0	0	na	na
Gjd2	Gjd2	Q4U2R1	Q4U2R1	0|1	0|0	-	0.5	1.47077	1.39339	0	0	0	na	na
Gjd2	Gjd2	Q8BVF7	Q8BVF7	1|0	0|0	-	0.5	1.43815	1.36978	0	0	0	na	na
Gjd2	Gjd2	Q68EF6	Q68EF6	23|14	27|11	-	18.5	0.878183	0.860913	0	0	0	na	na
Gjd2	Gjd2	Q7TQF7	Q7TQF7	1|1	0|0	-	1	1.90892	1.90864	0	0	0	na	na
Gjd2	Gjd2	Q99PQ2	Q99PQ2	1|0	0|0	-	0.5	1.43815	1.36978	0	0	0	na	na
Gjd2	Gjd2	Q99MR8	Q99MR8	170|81	162|71	-	125.5	0.961405	0.910865	0	0	0	na	na
Gjd2	Gjd2	P70404	P70404	1|0	0|0	-	0.5	1.43815	1.36978	0	0	0	na	na
Gjd2	Gjd2	Q8BG39	Q8BG39	1|0	1|0	-	0.5	0.954121	0.908762	0	0	0	na	na
Gjd2	Gjd2	Q3UTJ2	Q3UTJ2	1|0	0|0	-	0.5	1.43815	1.36978	0	0	0	na	na
Gjd2	Gjd2	Q80Z25	Q80Z25	0|1	0|0	-	0.5	1.47077	1.39339	0	0	0	na	na
Gjd2	Gjd2	Q8C9B9	Q8C9B9	0|1	0|0	-	0.5	1.47077	1.39339	0	0	0	na	na
Gjd2	Gjd2	P12970	P12970	0|1	0|0	-	0.5	1.47077	1.39339	0	0	0	na	na
Gjd2	Gjd2	Q91XM9	Q91XM9	13|9	13|9	-	11	0.908724	0.900595	0	0	0	na	na
Gjd2	Gjd2	Q08288	Q08288	13|47	20|47	-	30	0.839995	0.690145	0	0	0	na	na
Gjd2	Gjd2	Q8VDN2	Q8VDN2	17|0	16|0	-	8.5	0.926695	0.437334	0	0	0	na	na
Gjd2	Gjd2	B2RY56	B2RY56	1|1	0|1	-	1	1.27867	1.27848	0	0	0	na	na
Gjd2	Gjd2	Q9DCJ7	Q9DCJ7	1|1	1|1	-	1	0.954364	0.954224	0	0	0	na	na
Gjd2	Gjd2	Q99JR5	Q99JR5	1|0	1|0	-	0.5	0.954121	0.908762	0	0	0	na	na
Gjd2	Gjd2	Q6NSW3	Q6NSW3	1|1	1|2	-	1	0.765681	0.76557	0	0	0	na	na
Gjd2	Gjd2	Q62376	Q62376	0|1	0|0	-	0.5	1.47077	1.39339	0	0	0	na	na
Gjd2	Gjd2	Q80TH2	Q80TH2	1|0	0|0	-	0.5	1.43815	1.36978	0	0	0	na	na
Gjd2	Gjd2	P28738	P28738	0|1	0|0	-	0.5	1.47077	1.39339	0	0	0	na	na
Gjd2	Gjd2	Q8CH77	Q8CH77	1|0	0|0	-	0.5	1.43815	1.36978	0	0	0	na	na
Gjd2	Gjd2	Q61493	Q61493	0|1	0|1	-	0.5	0.985178	0.933347	0	0	0	na	na
Gjd2	Gjd2	Q8C7M3	Q8C7M3	1|1	0|0	-	1	1.90892	1.90864	0	0	0	na	na
Gjd2	Gjd2	P16460	P16460	1|0	1|0	-	0.5	0.954121	0.908762	0	0	0	na	na
Gjd2	Gjd2	Q04690	Q04690	1|0	0|0	-	0.5	1.43815	1.36978	0	0	0	na	na
Gjd2	Gjd2	Q8R4K8	Q8R4K8	1|0	0|0	-	0.5	1.43815	1.36978	0	0	0	na	na
Gjd2	Gjd2	P47915	P47915	16|6	20|8	-	11	0.718062	0.662315	0	0	0	na	na
Gjd2	Gjd2	Q8CDV6	Q8CDV6	1|0	0|0	-	0.5	1.43815	1.36978	0	0	0	na	na
Gjd2	Gjd2	Q9CPR4	Q9CPR4	30|18	35|20	-	24	0.790476	0.773439	0	0	0	na	na
Gjd2	Gjd2	P62702	P62702	10|9	9|13	-	9.5	0.803316	0.803225	0	0	0	na	na
Gjd2	Gjd2	Q5U5Q9	Q5U5Q9	1|0	0|0	-	0.5	1.43815	1.36978	0	0	0	na	na
Gjd2	Gjd2	O08539	O08539	1|0	0|0	-	0.5	1.43815	1.36978	0	0	0	na	na
Gjd2	Gjd2	Q6EDY6	Q6EDY6	0|1	0|0	-	0.5	1.47077	1.39339	0	0	0	na	na
Gjd2	Gjd2	P62274	P62274	5|4	7|5	-	4.5	0.723219	0.721889	0	0	0	na	na
Gjd2	Gjd2	P40124	P40124	0|1	0|0	-	0.5	1.47077	1.39339	0	0	0	na	na
Gjd2	Gjd2	P30415	P30415	1|3	1|9	-	2	0.479602	0.450725	0	0	0	na	na
Gjd2	Gjd2	Q9D883	Q9D883	1|3	2|6	-	2	0.573303	0.538784	0	0	0	na	na
Gjd2	Gjd2	P16858	P16858	16|9	15|9	-	12.5	0.938807	0.914418	0	0	0	na	na
Gjd2	Gjd2	E9Q8I9	E9Q8I9	1|0	0|2	-	0.5	0.724219	0.68979	0	0	0	na	na
Gjd2	Gjd2	Q05CL8	Q05CL8	0|1	0|0	-	0.5	1.47077	1.39339	0	0	0	na	na
Gjd2	Gjd2	Q6ZWN5	Q6ZWN5	10|17	8|11	-	13.5	1.27712	1.22948	0	0	0	na	na
Gjd2	Gjd2	Q7TQG1	Q7TQG1	1|0	0|1	-	0.5	0.963328	0.917532	0	0	0	na	na
Gjd2	Gjd2	Q8BQP8	Q8BQP8	1|0	0|0	-	0.5	1.43815	1.36978	0	0	0	na	na
Gjd2	Gjd2	P20443	P20443	4|4	13|3	-	4	0.510895	0.510693	0	0	0	na	na
Gjd2	Gjd2	Q6P5B0	Q6P5B0	1|19	0|22	-	10	0.876646	0.502654	0	0	0	na	na
Gjd2	Gjd2	P51410	P51410	0|1	0|1	-	0.5	0.985178	0.933347	0	0	0	na	na
Gjd2	Gjd2	Q3UUG6	Q3UUG6	1|0	0|0	-	0.5	1.43815	1.36978	0	0	0	na	na
Gjd2	Gjd2	O88492	O88492	0|1	0|1	-	0.5	0.985178	0.933347	0	0	0	na	na
Gjd2	Gjd2	Q9D6M3	Q9D6M3	1|0	0|0	-	0.5	1.43815	1.36978	0	0	0	na	na
Gjd2	Gjd2	Q91YM2	Q91YM2	1|0	0|0	-	0.5	1.43815	1.36978	0	0	0	na	na
Gjd2	Gjd2	Q80X50	Q80X50	1|0	1|1	-	0.5	0.719003	0.684821	0	0	0	na	na
Gjd2	Gjd2	Q8R124	Q8R124	2|6	1|7	-	4	0.948227	0.862953	0	0	0	na	na
Gjd2	Gjd2	P97929	P97929	1|0	0|0	-	0.5	1.43815	1.36978	0	0	0	na	na
Gjd2	Gjd2	Q3TY86	Q3TY86	1|0	0|0	-	0.5	1.43815	1.36978	0	0	0	na	na
Gjd2	Gjd2	Q6PB44	Q6PB44	1|0	0|0	-	0.5	1.43815	1.36978	0	0	0	na	na
Gjd2	Gjd2	Q8BKI2	Q8BKI2	1|0	0|1	-	0.5	0.963328	0.917532	0	0	0	na	na
Gjd2	Gjd2	Q9JIF7	Q9JIF7	1|0	0|0	-	0.5	1.43815	1.36978	0	0	0	na	na
Gjd2	Gjd2	P61255	P61255	35|17	41|14	-	26	0.848025	0.808628	0	0	0	na	na
Gjd2	Gjd2	Q8BH59	Q8BH59	12|8	8|7	-	10	1.17808	1.16497	0	0	0	na	na
Gjd2	Gjd2	P18181	P18181	0|1	0|0	-	0.5	1.47077	1.39339	0	0	0	na	na
Gjd2	Gjd2	P50516	P50516	0|1	1|0	-	0.5	0.975762	0.924426	0	0	0	na	na
Gjd2	Gjd2	Q8VFD0	Q8VFD0	0|1	0|0	-	0.5	1.47077	1.39339	0	0	0	na	na
Gjd2	Gjd2	Q6PDZ2	Q6PDZ2	7|4	6|5	-	5.5	0.914236	0.895954	0	0	0	na	na
Gjd2	Gjd2	Q8VCM7	Q8VCM7	5|9	7|3	-	7	1.23182	1.18416	0	0	0	na	na
Gjd2	Gjd2	Q9D5Y1	Q9D5Y1	1|0	0|0	-	0.5	1.43815	1.36978	0	0	0	na	na
Gjd2	Gjd2	G5E8K5	G5E8K5	4|1	5|4	-	2.5	0.585204	0.536942	0	0	0	na	na
Gjd2	Gjd2	Q8BHZ0	Q8BHZ0	0|1	0|0	-	0.5	1.47077	1.39339	0	0	0	na	na
Gjd2	Gjd2	P70193	P70193	0|1	0|0	-	0.5	1.47077	1.39339	0	0	0	na	na
Gjd2	Gjd2	Q9EQJ9	Q9EQJ9	1|0	0|0	-	0.5	1.43815	1.36978	0	0	0	na	na
Gjd2	Gjd2	P59016	P59016	0|1	0|0	-	0.5	1.47077	1.39339	0	0	0	na	na
Gjd2	Gjd2	P49312	P49312	2|0	4|0	-	1	0.619401	0.547698	0	0	0	na	na
Gjd2	Gjd2	Q99KI0	Q99KI0	1|0	1|0	-	0.5	0.954121	0.908762	0	0	0	na	na
Gjd2	Gjd2	Q8K2I9	Q8K2I9	1|0	0|0	-	0.5	1.43815	1.36978	0	0	0	na	na
Gjd2	Gjd2	Q00547	Q00547	1|0	0|0	-	0.5	1.43815	1.36978	0	0	0	na	na
Gjd2	Gjd2	P09602	P09602	1|0	1|0	-	0.5	0.954121	0.908762	0	0	0	na	na
Gjd2	Gjd2	P62852	P62852	0|3	1|4	-	1.5	0.693413	0.562151	0	0	0	na	na
Gjd2	Gjd2	P62855	P62855	5|5	7|3	-	5	0.91953	0.919132	0	0	0	na	na
Gjd2	Gjd2	A3KGF9	A3KGF9	1|0	0|0	-	0.5	1.43815	1.36978	0	0	0	na	na
Gjd2	Gjd2	P08775	P08775	1|30	0|42	-	15.5	0.717052	0.341344	0	0	0	na	na
Gjd2	Gjd2	Q9Z277	Q9Z277	1|56	2|60	-	28.5	0.880108	0.317845	0	0	0	na	na
Gjd2	Gjd2	Q0VEE6	Q0VEE6	8|5	6|5	-	6.5	1.05389	1.03894	0	0	0	na	na
Gjd2	Gjd2	Q60598	Q60598	1|0	0|0	-	0.5	1.43815	1.36978	0	0	0	na	na
Gjd2	Gjd2	Q8BYK4	Q8BYK4	1|0	2|0	-	0.5	0.713861	0.679924	0	0	0	na	na
Gjd2	Gjd2	A2A5R2	A2A5R2	0|1	0|0	-	0.5	1.47077	1.39339	0	0	0	na	na
Gjd2	Gjd2	O88848	O88848	1|0	1|0	-	0.5	0.954121	0.908762	0	0	0	na	na
Gjd2	Gjd2	Q8R050	Q8R050	1|0	0|0	-	0.5	1.43815	1.36978	0	0	0	na	na
Gjd2	Gjd2	P62301	P62301	8|6	11|7	-	7	0.730744	0.727587	0	0	0	na	na
Gjd2	Gjd2	Q8BYK8	Q8BYK8	0|2	0|13	-	1	0.262099	0.229217	0	0	0	na	na
Gjd2	Gjd2	B2RRD7	B2RRD7	0|1	0|1	-	0.5	0.985178	0.933347	0	0	0	na	na
Gjd2	Gjd2	P10853	P10853	5|0	9|8	-	2.5	0.335554	0.243961	0	0	0	na	na
Gjd2	Gjd2	P43274	P43274	45|43	61|43	-	44	0.770789	0.770726	0	0	0	na	na
Gjd2	Gjd2	P43275	P43275	16|12	20|10	-	14	0.849741	0.845512	0	0	0	na	na
Gjd2	Gjd2	P43276	P43276	12|13	20|18	-	12.5	0.618327	0.616825	0	0	0	na	na
Gjd2	Gjd2	P43277	P43277	47|43	0|43	-	45	1.88497	1.8849	0	0	0	na	na
Gjd2	Gjd2	Q920N2	Q920N2	1|0	1|0	-	0.5	0.954121	0.908762	0	0	0	na	na
Gjd2	Gjd2	P70208	P70208	0|1	0|0	-	0.5	1.47077	1.39339	0	0	0	na	na
Gjd2	Gjd2	Q8BTI8	Q8BTI8	82|212	87|211	-	147	0.916819	0.810629	0	0	0	na	na
Gjd2	Gjd2	Q91VR2	Q91VR2	7|4	9|4	-	5.5	0.789422	0.773636	0	0	0	na	na
Gjd2	Gjd2	Q8BGK6	Q8BGK6	0|1	0|0	-	0.5	1.47077	1.39339	0	0	0	na	na
Gjd2	Gjd2	Q9Z188	Q9Z188	0|1	0|0	-	0.5	1.47077	1.39339	0	0	0	na	na
Gjd2	Gjd2	Q6P542	Q6P542	0|1	0|0	-	0.5	1.47077	1.39339	0	0	0	na	na
Gjd2	Gjd2	Q6NVF9	Q6NVF9	0|1	0|0	-	0.5	1.47077	1.39339	0	0	0	na	na
Gjd2	Gjd2	P18653	P18653	1|0	0|0	-	0.5	1.43815	1.36978	0	0	0	na	na
Gjd2	Gjd2	F6XZJ7	F6XZJ7	0|1	0|0	-	0.5	1.47077	1.39339	0	0	0	na	na
Gjd2	Gjd2	A6X8Z5	A6X8Z5	1|0	0|0	-	0.5	1.43815	1.36978	0	0	0	na	na
Gjd2	Gjd2	Q64096	Q64096	0|1	0|0	-	0.5	1.47077	1.39339	0	0	0	na	na
Gjd2	Gjd2	P52480	P52480	4|2	11|0	-	3	0.56139	0.547692	0	0	0	na	na
Gjd2	Gjd2	O70570	O70570	1|0	0|0	-	0.5	1.43815	1.36978	0	0	0	na	na
Gjd2	Gjd2	P23198	P23198	0|1	0|1	-	0.5	0.985178	0.933347	0	0	0	na	na
Gjd2	Gjd2	P62983	P62983	19|11	19|6	-	15	1.06672	1.04132	0	0	0	na	na
Gjd2	Gjd2	Q9QX47	Q9QX47	43|85	35|72	-	64	1.10345	1.0321	0	0	0	na	na
Gjd2	Gjd2	P27659	P27659	65|9	47|9	-	37	1.15155	0.800321	0	0	0	na	na
Gjd2	Gjd2	Q9EPU0	Q9EPU0	4|1	3|4	-	2.5	0.71734	0.658181	0	0	0	na	na
Gjd2	Gjd2	E9Q5F9	E9Q5F9	0|1	0|2	-	0.5	0.740645	0.701679	0	0	0	na	na
Gjd2	Gjd2	Q60749	Q60749	0|1	0|0	-	0.5	1.47077	1.39339	0	0	0	na	na
Gjd2	Gjd2	Q91ZA3	Q91ZA3	321|123	311|111	-	222	0.934738	0.850599	0	0	0	na	na
Gjd2	Gjd2	Q8C0Q3	Q8C0Q3	1|0	0|0	-	0.5	1.43815	1.36978	0	0	0	na	na
Gjd2	Gjd2	Q91ZV0	Q91ZV0	0|1	0|0	-	0.5	1.47077	1.39339	0	0	0	na	na
Gjd2	Gjd2	Q68FH0	Q68FH0	4|4	0|8	-	4	0.937793	0.937421	0	0	0	na	na
Gjd2	Gjd2	Q8CH09	Q8CH09	23|14	5|16	-	18.5	1.54674	1.51632	0	0	0	na	na
Gjd2	Gjd2	P40201	P40201	0|6	0|9	-	3	0.703562	0.474351	0	0	0	na	na
Gjd2	Gjd2	A3KGK3	A3KGK3	1|1	0|0	-	1	1.90892	1.90864	0	0	0	na	na
Gjd2	Gjd2	Q5SXJ3	Q5SXJ3	0|1	0|0	-	0.5	1.47077	1.39339	0	0	0	na	na
Gjd2	Gjd2	P14131	P14131	0|1	0|1	-	0.5	0.985178	0.933347	0	0	0	na	na
Gjd2	Gjd2	Q9CXW4	Q9CXW4	4|7	4|5	-	5.5	1.10089	1.06447	0	0	0	na	na
Gjd2	Gjd2	Q6P7F1	Q6P7F1	11|4	12|1	-	7.5	1.01612	0.939378	0	0	0	na	na
Gjd2	Gjd2	P20357	P20357	3|2	1|6	-	2.5	0.729276	0.724477	0	0	0	na	na
Gjd2	Gjd2	P30558	P30558	0|1	0|0	-	0.5	1.47077	1.39339	0	0	0	na	na
Gjd2	Gjd2	Q6VVW5	Q6VVW5	1|0	0|0	-	0.5	1.43815	1.36978	0	0	0	na	na
Gjd2	Gjd2	Q9QYX7	Q9QYX7	12|12	9|17	-	12	0.853858	0.853396	0	0	0	na	na
Gjd2	Gjd2	Q9JJI8	Q9JJI8	3|3	4|3	-	3	0.826716	0.826431	0	0	0	na	na
Gjd2	Gjd2	Q5U4D8	Q5U4D8	1|0	0|0	-	0.5	1.43815	1.36978	0	0	0	na	na
Gjd2	Gjd2	Q8R0F5	Q8R0F5	0|1	0|1	-	0.5	0.985178	0.933347	0	0	0	na	na
Gjd2	Gjd2	Q02257	Q02257	1|0	1|0	-	0.5	0.954121	0.908762	0	0	0	na	na
Gjd2	Gjd2	Q69Z99	Q69Z99	4|26	3|24	-	15	1.04468	0.746554	0	0	0	na	na
Gjd2	Gjd2	Q923Z4	Q923Z4	1|0	0|0	-	0.5	1.43815	1.36978	0	0	0	na	na
Gjd2	Gjd2	Q62511	Q62511	0|1	0|0	-	0.5	1.47077	1.39339	0	0	0	na	na
Gjd2	Gjd2	Q9ERU3	Q9ERU3	25|8	22|11	-	16.5	0.894063	0.795134	0	0	0	na	na
Gjd2	Gjd2	Q3UH06	Q3UH06	1|0	0|0	-	0.5	1.43815	1.36978	0	0	0	na	na
Gjd2	Gjd2	Q9WUH7	Q9WUH7	1|0	0|0	-	0.5	1.43815	1.36978	0	0	0	na	na
Gjd2	Gjd2	B7ZNG4	B7ZNG4	0|1	0|0	-	0.5	1.47077	1.39339	0	0	0	na	na
Gjd2	Gjd2	O70340	O70340	0|1	0|0	-	0.5	1.47077	1.39339	0	0	0	na	na
Gjd2	Gjd2	Q9Z2K1	Q9Z2K1	8|9	8|7	-	8.5	1.02743	1.02383	0	0	0	na	na
Gjd2	Gjd2	P62996	P62996	0|1	0|2	-	0.5	0.740645	0.701679	0	0	0	na	na
Gjd2	Gjd2	O54827	O54827	0|1	0|0	-	0.5	1.47077	1.39339	0	0	0	na	na
Gjd2	Gjd2	Q04736	Q04736	1|0	0|0	-	0.5	1.43815	1.36978	0	0	0	na	na
Gjd2	Gjd2	P49194	P49194	13|6	15|9	-	9.5	0.72979	0.695808	0	0	0	na	na
Gjd2	Gjd2	Q8BVG5	Q8BVG5	0|1	0|0	-	0.5	1.47077	1.39339	0	0	0	na	na
Gjd2	Gjd2	O35177	O35177	1|0	0|0	-	0.5	1.43815	1.36978	0	0	0	na	na
Gjd2	Gjd2	Q9WVQ0	Q9WVQ0	1|0	0|0	-	0.5	1.43815	1.36978	0	0	0	na	na
Gjd2	Gjd2	Q0P678	Q0P678	0|2	0|4	-	1	0.653367	0.571399	0	0	0	na	na
Gjd2	Gjd2	P39655	P39655	0|1	0|0	-	0.5	1.47077	1.39339	0	0	0	na	na
Gjd2	Gjd2	O88738	O88738	39|35	42|38	-	37	0.842286	0.842155	0	0	0	na	na
Gjd2	Gjd2	Q70KF4	Q70KF4	1|0	0|0	-	0.5	1.43815	1.36978	0	0	0	na	na
Gjd2	Gjd2	Q6P9P6	Q6P9P6	1|0	0|0	-	0.5	1.43815	1.36978	0	0	0	na	na
Gjd2	Gjd2	Q3V0C1	Q3V0C1	4|4	1|6	-	4	1.0383	1.03789	0	0	0	na	na
Gjd2	Gjd2	Q8BMS1	Q8BMS1	16|1	17|5	-	8.5	0.701581	0.446726	0	0	0	na	na
Gjd2	Gjd2	O88737	O88737	21|11	37|20	-	16	0.519087	0.501016	0	0	0	na	na
Gjd2	Gjd2	Q3UGM2	Q3UGM2	1|0	0|0	-	0.5	1.43815	1.36978	0	0	0	na	na
Gjd2	Gjd2	P97797	P97797	1|0	0|0	-	0.5	1.43815	1.36978	0	0	0	na	na
Gjd2	Gjd2	Q91YE3	Q91YE3	0|1	0|0	-	0.5	1.47077	1.39339	0	0	0	na	na
Gjd2	Gjd2	Q5U4C3	Q5U4C3	0|59	1|71	-	29.5	0.788302	0.206011	0	0	0	na	na
Gjd2	Gjd2	Q3TES0	Q3TES0	9|11	6|8	-	10	1.26729	1.25782	0	0	0	na	na
Gjd2	Gjd2	P0C6F1	P0C6F1	1|0	0|0	-	0.5	1.43815	1.36978	0	0	0	na	na
Gjd2	Gjd2	Q52KI8	Q52KI8	11|38	9|44	-	24.5	0.869948	0.725831	0	0	0	na	na
Gjd2	Gjd2	P11983	P11983	10|7	8|3	-	8.5	1.32733	1.31689	0	0	0	na	na
Gjd2	Gjd2	Q9D2G2	Q9D2G2	1|0	2|0	-	0.5	0.713861	0.679924	0	0	0	na	na
Gjd2	Gjd2	Q7TMY8	Q7TMY8	0|1	0|0	-	0.5	1.47077	1.39339	0	0	0	na	na
Gjd2	Gjd2	P18872	P18872	2|0	4|0	-	1	0.619401	0.547698	0	0	0	na	na
Gjd2	Gjd2	E9PXB6	E9PXB6	0|1	0|0	-	0.5	1.47077	1.39339	0	0	0	na	na
Gjd2	Gjd2	P09411	P09411	1|0	5|0	-	0.5	0.406657	0.387325	0	0	0	na	na
Gjd2	Gjd2	Q8K3I9	Q8K3I9	0|1	0|0	-	0.5	1.47077	1.39339	0	0	0	na	na
Gjd2	Gjd2	P28481	P28481	4|10	4|9	-	7	0.999331	0.917589	0	0	0	na	na
Gjd2	Gjd2	P56564	P56564	0|1	0|0	-	0.5	1.47077	1.39339	0	0	0	na	na
Gjd2	Gjd2	Q8VDD5	Q8VDD5	1|63	0|65	-	32	0.941229	0.321998	0	0	0	na	na
Gjd2	Gjd2	Q3UH68	Q3UH68	1|0	0|0	-	0.5	1.43815	1.36978	0	0	0	na	na
Gjd2	Gjd2	Q3UH66	Q3UH66	1|0	0|0	-	0.5	1.43815	1.36978	0	0	0	na	na
Gjd2	Gjd2	Q8VDD9	Q8VDD9	2|8	2|16	-	5	0.569889	0.489471	0	0	0	na	na
Gjd2	Gjd2	Q8R0S2	Q8R0S2	16|11	16|12	-	13.5	0.877408	0.868902	0	0	0	na	na
Gjd2	Gjd2	Q922J3	Q922J3	1|0	0|0	-	0.5	1.43815	1.36978	0	0	0	na	na
Gjd2	Gjd2	Q8C050	Q8C050	1|0	0|0	-	0.5	1.43815	1.36978	0	0	0	na	na
Gjd2	Gjd2	A2A791	A2A791	1|0	0|0	-	0.5	1.43815	1.36978	0	0	0	na	na
Gjd2	Gjd2	Q5SXA9	Q5SXA9	0|1	0|0	-	0.5	1.47077	1.39339	0	0	0	na	na
Gjd2	Gjd2	Q8BG05	Q8BG05	0|1	0|3	-	0.5	0.593365	0.562148	0	0	0	na	na
Gjd2	Gjd2	Q8C119	Q8C119	1|0	1|0	-	0.5	0.954121	0.908762	0	0	0	na	na
Gjd2	Gjd2	Q7TT50	Q7TT50	1|0	0|0	-	0.5	1.43815	1.36978	0	0	0	na	na
Gjd2	Gjd2	P49749	P49749	0|1	0|0	-	0.5	1.47077	1.39339	0	0	0	na	na
Gjd2	Gjd2	Q0VF58	Q0VF58	0|1	0|0	-	0.5	1.47077	1.39339	0	0	0	na	na
Gjd2	Gjd2	P23819	P23819	0|1	0|0	-	0.5	1.47077	1.39339	0	0	0	na	na
Gjd2	Gjd2	Q8BZ21	Q8BZ21	0|21	0|23	-	10.5	0.882425	0.369441	0	0	0	na	na
Gjd2	Gjd2	Q8CFS6	Q8CFS6	1|0	0|0	-	0.5	1.43815	1.36978	0	0	0	na	na
Gjd2	Gjd2	Q9Z2V6	Q9Z2V6	0|1	0|0	-	0.5	1.47077	1.39339	0	0	0	na	na
Gjd2	Gjd2	P13504	P13504	0|1	0|0	-	0.5	1.47077	1.39339	0	0	0	na	na
Gjd2	Gjd2	Q99104	Q99104	9|38	1|27	-	23.5	1.54113	1.22025	0	0	0	na	na
Gjd2	Gjd2	Q9CXS4	Q9CXS4	1|1	1|2	-	1	0.765681	0.76557	0	0	0	na	na
Gjd2	Gjd2	Q9D0E1	Q9D0E1	25|35	19|30	-	30	1.11819	1.09688	0	0	0	na	na
Gjd2	Gjd2	A2AAE1	A2AAE1	1|1	0|0	-	1	1.90892	1.90864	0	0	0	na	na
Gjd2	Gjd2	P47911	P47911	10|4	8|4	-	7	1.03337	0.97033	0	0	0	na	na
Gjd2	Gjd2	Q9QZ15	Q9QZ15	1|0	0|0	-	0.5	1.43815	1.36978	0	0	0	na	na
Gjd2	Gjd2	Q3TTY5	Q3TTY5	12|8	16|8	-	10	0.767529	0.758983	0	0	0	na	na
Gjd2	Gjd2	Q922U2	Q922U2	26|19	27|11	-	22.5	1.06051	1.05351	0	0	0	na	na
Gjd2	Gjd2	Q91YE5	Q91YE5	0|35	0|40	-	17.5	0.843649	0.281281	0	0	0	na	na
Gjd2	Gjd2	P61514	P61514	13|3	16|6	-	8	0.671533	0.570168	0	0	0	na	na
Gjd2	Gjd2	P46460	P46460	1|0	1|0	-	0.5	0.954121	0.908762	0	0	0	na	na
Gjd2	Gjd2	E9Q784	E9Q784	3|30	3|44	-	16.5	0.678973	0.425538	0	0	0	na	na
Gjd2	Gjd2	O08547	O08547	1|1	0|0	-	1	1.90892	1.90864	0	0	0	na	na
Gjd2	Gjd2	Q8K4E0	Q8K4E0	1|0	0|0	-	0.5	1.43815	1.36978	0	0	0	na	na
Gjd2	Gjd2	Q80TE0	Q80TE0	1|0	0|0	-	0.5	1.43815	1.36978	0	0	0	na	na
Gjd2	Gjd2	Q6ZPZ3	Q6ZPZ3	3|6	1|10	-	4.5	0.798453	0.7632	0	0	0	na	na
Gjd2	Gjd2	P62242	P62242	43|16	49|23	-	29.5	0.735935	0.6702	0	0	0	na	na
Gjd2	Gjd2	Q5XJV7	Q5XJV7	1|0	0|0	-	0.5	1.43815	1.36978	0	0	0	na	na
Gjd2	Gjd2	P62245	P62245	3|1	4|1	-	2	0.790781	0.753629	0	0	0	na	na
Gjd2	Gjd2	Q61164	Q61164	1|36	0|46	-	18.5	0.77665	0.341804	0	0	0	na	na
Gjd2	Gjd2	Q91WJ0	Q91WJ0	1|0	0|0	-	0.5	1.43815	1.36978	0	0	0	na	na
Gjd2	Gjd2	Q8BWT1	Q8BWT1	10|2	10|6	-	6	0.700193	0.587505	0	0	0	na	na
Gjd2	Gjd2	O35286	O35286	17|21	13|19	-	19	1.08106	1.07146	0	0	0	na	na
Gjd2	Gjd2	Q9D7V9	Q9D7V9	0|1	0|1	-	0.5	0.985178	0.933347	0	0	0	na	na
Gjd2	Gjd2	Q99MN9	Q99MN9	27|16	27|17	-	21.5	0.882387	0.862509	0	0	0	na	na
Gjd2	Gjd2	Q8R2M2	Q8R2M2	0|1	0|1	-	0.5	0.985178	0.933347	0	0	0	na	na
Gjd2	Gjd2	P41149	P41149	1|0	0|0	-	0.5	1.43815	1.36978	0	0	0	na	na
Gjd2	Gjd2	B2RRE4	B2RRE4	1|0	0|0	-	0.5	1.43815	1.36978	0	0	0	na	na
Gjd2	Gjd2	Q8VHY0	Q8VHY0	0|1	0|0	-	0.5	1.47077	1.39339	0	0	0	na	na
Gjd2	Gjd2	Q9D6K5	Q9D6K5	0|1	0|0	-	0.5	1.47077	1.39339	0	0	0	na	na
Gjd2	Gjd2	O88466	O88466	1|0	0|0	-	0.5	1.43815	1.36978	0	0	0	na	na
Gjd2	Gjd2	E9Q557	E9Q557	1|0	1|0	-	0.5	0.954121	0.908762	0	0	0	na	na
Gjd2	Gjd2	Q70FJ1	Q70FJ1	1|1	0|1	-	1	1.27867	1.27848	0	0	0	na	na
Gjd2	Gjd2	P15409	P15409	9|5	8|5	-	7	0.969996	0.946704	0	0	0	na	na
Gjd2	Gjd2	Q9WV92	Q9WV92	14|11	6|14	-	12.5	1.12501	1.12162	0	0	0	na	na
Gjd2	Gjd2	Q0VFX2	Q0VFX2	1|0	1|0	-	0.5	0.954121	0.908762	0	0	0	na	na
Gjd2	Gjd2	Q9CPT5	Q9CPT5	9|5	10|7	-	7	0.766245	0.747846	0	0	0	na	na
Gjd2	Gjd2	Q62095	Q62095	1|0	1|0	-	0.5	0.954121	0.908762	0	0	0	na	na
Gjd2	Gjd2	Q99ME9	Q99ME9	17|31	19|31	-	24	0.88903	0.845206	0	0	0	na	na
Gjd2	Gjd2	Q99LX5	Q99LX5	4|5	4|7	-	4.5	0.788093	0.782611	0	0	0	na	na
Gjd2	Gjd2	Q6NS57	Q6NS57	1|0	0|0	-	0.5	1.43815	1.36978	0	0	0	na	na
Gjd2	Gjd2	Q569L8	Q569L8	0|1	0|0	-	0.5	1.47077	1.39339	0	0	0	na	na
Gjd2	Gjd2	Q7SIG6	Q7SIG6	1|2	2|2	-	1.5	0.793123	0.775175	0	0	0	na	na
Gjd2	Gjd2	Q8CFI7	Q8CFI7	0|16	1|21	-	8	0.719532	0.338001	0	0	0	na	na
Gjd2	Gjd2	P51881	P51881	19|6	20|9	-	12.5	0.779704	0.695228	0	0	0	na	na
Gjd2	Gjd2	Q9JIS3	Q9JIS3	0|1	0|0	-	0.5	1.47077	1.39339	0	0	0	na	na
Gjd2	Gjd2	Q62137	Q62137	0|1	0|0	-	0.5	1.47077	1.39339	0	0	0	na	na
Gjd2	Gjd2	P06151	P06151	1|0	4|0	-	0.5	0.47476	0.45219	0	0	0	na	na
Gjd2	Gjd2	Q9Z351	Q9Z351	1|0	0|0	-	0.5	1.43815	1.36978	0	0	0	na	na
Gjd2	Gjd2	P15864	P15864	0|34	66|37	-	17	0.32258	0.108985	0	0	0	na	na
Gjd2	Gjd2	Q8VBU8	Q8VBU8	1|0	0|0	-	0.5	1.43815	1.36978	0	0	0	na	na
Gjd2	Gjd2	Q920Q2	Q920Q2	0|1	0|0	-	0.5	1.47077	1.39339	0	0	0	na	na
Gjd2	Gjd2	Q8BP67	Q8BP67	16|11	25|16	-	13.5	0.611475	0.605547	0	0	0	na	na
Gjd2	Gjd2	P63017	P63017	0|2	4|0	-	1	0.640938	0.560529	0	0	0	na	na
Gjd2	Gjd2	Q3UHX9	Q3UHX9	1|3	1|5	-	2	0.717676	0.674464	0	0	0	na	na
Gjd2	Gjd2	F8VPU2	F8VPU2	0|1	0|1	-	0.5	0.985178	0.933347	0	0	0	na	na
Gjd2	Gjd2	P97868	P97868	5|32	5|38	-	18.5	0.819854	0.581275	0	0	0	na	na
Gjd2	Gjd2	P70279	P70279	22|9	19|10	-	15.5	0.95558	0.890341	0	0	0	na	na
Gjd2	Gjd2	Q9D6T1	Q9D6T1	0|1	0|0	-	0.5	1.47077	1.39339	0	0	0	na	na
Gjd2	Gjd2	P97460	P97460	0|1	0|0	-	0.5	1.47077	1.39339	0	0	0	na	na
Gjd2	Gjd2	Q9CWR8	Q9CWR8	1|0	0|0	-	0.5	1.43815	1.36978	0	0	0	na	na
Gjd2	Gjd2	Q61062	Q61062	1|0	0|0	-	0.5	1.43815	1.36978	0	0	0	na	na
Gjd2	Gjd2	P62862	P62862	5|1	6|2	-	3	0.727992	0.642673	0	0	0	na	na
Gjd2	Gjd2	P62908	P62908	2|2	0|4	-	2	0.94826	0.948006	0	0	0	na	na
Gjd2	Gjd2	Q2UY11	Q2UY11	1|0	0|0	-	0.5	1.43815	1.36978	0	0	0	na	na
Gjd2	Gjd2	Q8BRT1	Q8BRT1	1|0	0|0	-	0.5	1.43815	1.36978	0	0	0	na	na
Gjd2	Gjd2	D3YXS5	D3YXS5	0|1	0|0	-	0.5	1.47077	1.39339	0	0	0	na	na
Gjd2	Gjd2	Q8VED5	Q8VED5	9|6	11|6	-	7.5	0.814447	0.805956	0	0	0	na	na
Gjd2	Gjd2	O35516	O35516	0|1	0|1	-	0.5	0.985178	0.933347	0	0	0	na	na
Gjd2	Gjd2	Q14BI2	Q14BI2	1|0	0|0	-	0.5	1.43815	1.36978	0	0	0	na	na
Gjd2	Gjd2	P62334	P62334	0|1	0|0	-	0.5	1.47077	1.39339	0	0	0	na	na
Gjd2	Gjd2	P63087	P63087	1|0	0|0	-	0.5	1.43815	1.36978	0	0	0	na	na
Gjd2	Gjd2	Q8VEK3	Q8VEK3	10|16	9|12	-	13	1.12485	1.09085	0	0	0	na	na
Gjd2	Gjd2	Q6PDM1	Q6PDM1	0|2	0|4	-	1	0.653367	0.571399	0	0	0	na	na
Gjd2	Gjd2	P28571	P28571	1|1	0|0	-	1	1.90892	1.90864	0	0	0	na	na
Gjd2	Gjd2	Q60I26	Q60I26	0|1	0|1	-	0.5	0.985178	0.933347	0	0	0	na	na
Gjd2	Gjd2	P63089	P63089	1|0	1|0	-	0.5	0.954121	0.908762	0	0	0	na	na
Gjd2	Gjd2	Q99LI5	Q99LI5	1|0	0|0	-	0.5	1.43815	1.36978	0	0	0	na	na
Gjd2	Gjd2	Q61656	Q61656	4|11	2|10	-	7.5	1.14222	1.03016	0	0	0	na	na
Gjd2	Gjd2	P52482	P52482	1|0	0|0	-	0.5	1.43815	1.36978	0	0	0	na	na
Gjd2	Gjd2	Q9JM52	Q9JM52	1|0	0|0	-	0.5	1.43815	1.36978	0	0	0	na	na
Gjd2	Gjd2	A6H630	A6H630	0|1	0|0	-	0.5	1.47077	1.39339	0	0	0	na	na
Gjd2	Gjd2	P17182	P17182	8|8	18|7	-	8	0.609005	0.608702	0	0	0	na	na
Gjd2	Gjd2	Q6A4J8	Q6A4J8	1|6	1|10	-	3.5	0.662303	0.548785	0	0	0	na	na
Gjd2	Gjd2	Q6NVE9	Q6NVE9	0|1	0|0	-	0.5	1.47077	1.39339	0	0	0	na	na
Gjd2	Gjd2	Q62312	Q62312	0|1	0|0	-	0.5	1.47077	1.39339	0	0	0	na	na
Gjd2	Gjd2	F8VPZ9	F8VPZ9	1|0	0|0	-	0.5	1.43815	1.36978	0	0	0	na	na
Gjd2	Gjd2	Q69Z37	Q69Z37	0|1	0|0	-	0.5	1.47077	1.39339	0	0	0	na	na
Gjd2	Gjd2	Q68FF6	Q68FF6	1|0	0|0	-	0.5	1.43815	1.36978	0	0	0	na	na
Gjd2	Gjd2	Q8CI17	Q8CI17	0|1	0|0	-	0.5	1.47077	1.39339	0	0	0	na	na
Gjd2	Gjd2	E9Q4Z2	E9Q4Z2	189|101	172|104	-	145	0.941516	0.906958	0	0	0	na	na
Gjd2	Gjd2	Q6ZPV2	Q6ZPV2	0|3	0|8	-	1.5	0.488007	0.395628	0	0	0	na	na
Gjd2	Gjd2	Q2TV84	Q2TV84	1|28	0|22	-	14.5	1.23438	0.604985	0	0	0	na	na
Gjd2	Gjd2	Q9ESX4	Q9ESX4	1|1	1|2	-	1	0.765681	0.76557	0	0	0	na	na
Gjd2	Gjd2	Q8BID6	Q8BID6	0|1	0|0	-	0.5	1.47077	1.39339	0	0	0	na	na
Gjd2	Gjd2	P97351	P97351	11|20	14|23	-	15.5	0.78374	0.747231	0	0	0	na	na
Gjd2	Gjd2	O70443	O70443	1|0	0|0	-	0.5	1.43815	1.36978	0	0	0	na	na
Gjd2	Gjd2	Q80V94	Q80V94	1|0	1|0	-	0.5	0.954121	0.908762	0	0	0	na	na
Gjd2	Gjd2	Q8BL97	Q8BL97	0|4	2|7	-	2	0.527564	0.399487	0	0	0	na	na
Gjd2	Gjd2	A2A6A1	A2A6A1	0|1	0|1	-	0.5	0.985178	0.933347	0	0	0	na	na
Gjd2	Gjd2	Q9EPT5	Q9EPT5	0|1	0|1	-	0.5	0.985178	0.933347	0	0	0	na	na
Gjd2	Gjd2	Q9DBY5	Q9DBY5	0|1	0|1	-	0.5	0.985178	0.933347	0	0	0	na	na
Gjd2	Gjd2	Q5U405	Q5U405	1|0	0|0	-	0.5	1.43815	1.36978	0	0	0	na	na
Gjd2	Gjd2	Q91ZQ1	Q91ZQ1	1|0	0|0	-	0.5	1.43815	1.36978	0	0	0	na	na
Gjd2	Gjd2	O35435	O35435	1|0	0|0	-	0.5	1.43815	1.36978	0	0	0	na	na
Gjd2	Gjd2	P97358	P97358	1|0	0|0	-	0.5	1.43815	1.36978	0	0	0	na	na
Gjd2	Gjd2	Q9Z2C5	Q9Z2C5	1|0	0|0	-	0.5	1.43815	1.36978	0	0	0	na	na
Gjd2	Gjd2	O55142	O55142	1|0	0|0	-	0.5	1.43815	1.36978	0	0	0	na	na
Gjd2	Gjd2	Q9QZQ0	Q9QZQ0	1|0	0|0	-	0.5	1.43815	1.36978	0	0	0	na	na
Gjd2	Gjd2	Q99MY8	Q99MY8	0|9	0|15	-	4.5	0.623929	0.366709	0	0	0	na	na
Gjd2	Gjd2	Q9D1R9	Q9D1R9	12|2	13|7	-	7	0.651805	0.521671	0	0	0	na	na
Gjd2	Gjd2	Q6NXH9	Q6NXH9	0|8	10|6	-	4	0.527789	0.323463	0	0	0	na	na
Gjd2	Gjd2	Q9D6F9	Q9D6F9	65|29	52|30	-	47	1.02289	0.960553	0	0	0	na	na
Gjd2	Gjd2	Q7TMM9	Q7TMM9	65|29	55|33	-	47	0.95494	0.896741	0	0	0	na	na
Gjd2	Gjd2	Q80U72	Q80U72	1|0	0|0	-	0.5	1.43815	1.36978	0	0	0	na	na
Gjd2	Gjd2	Q8BMB0	Q8BMB0	1|1	0|0	-	1	1.90892	1.90864	0	0	0	na	na
Gjd2	Gjd2	Q3THE2	Q3THE2	0|15	0|19	-	7.5	0.777762	0.375188	0	0	0	na	na
Gjd2	Gjd2	Q9D3P1	Q9D3P1	1|0	0|0	-	0.5	1.43815	1.36978	0	0	0	na	na
Gjd2	Gjd2	O70133	O70133	1|0	2|1	-	0.5	0.573538	0.546272	0	0	0	na	na
Gjd2	Gjd2	Q8VI84	Q8VI84	0|1	0|2	-	0.5	0.740645	0.701679	0	0	0	na	na
Gjd2	Gjd2	P97717	P97717	0|1	0|0	-	0.5	1.47077	1.39339	0	0	0	na	na
Gjd2	Gjd2	P97303	P97303	1|0	0|0	-	0.5	1.43815	1.36978	0	0	0	na	na
Gjd2	Gjd2	P04104	P04104	14|11	16|8	-	12.5	0.942766	0.939922	0	0	0	na	na
Gjd2	Gjd2	P83882	P83882	4|3	6|3	-	3.5	0.754169	0.751647	0	0	0	na	na
Gjd2	Gjd2	Q9DBR0	Q9DBR0	0|1	0|2	-	0.5	0.740645	0.701679	0	0	0	na	na
Gjd2	Gjd2	Q8BVY0	Q8BVY0	5|20	3|19	-	12.5	1.0605	0.869062	0	0	0	na	na
Gjd2	Gjd2	Q3UH53	Q3UH53	0|1	0|0	-	0.5	1.47077	1.39339	0	0	0	na	na
Gjd2	Gjd2	Q5F2F2	Q5F2F2	1|0	0|0	-	0.5	1.43815	1.36978	0	0	0	na	na
Gjd2	Gjd2	E9PV24	E9PV24	3|5	5|2	-	4	1.03228	1.00637	0	0	0	na	na
Gjd2	Gjd2	Q9Z2H5	Q9Z2H5	4|4	1|8	-	4	0.850508	0.850171	0	0	0	na	na
Gjd2	Gjd2	P62267	P62267	19|6	20|9	-	12.5	0.779704	0.695228	0	0	0	na	na
Gjd2	Gjd2	Q7TPV4	Q7TPV4	2|8	3|11	-	5	0.710298	0.610067	0	0	0	na	na
Gjd2	Gjd2	O70394	O70394	1|0	0|0	-	0.5	1.43815	1.36978	0	0	0	na	na
Gjd2	Gjd2	Q9Z138	Q9Z138	1|0	0|0	-	0.5	1.43815	1.36978	0	0	0	na	na
Gjd2	Gjd2	Q99N91	Q99N91	3|1	7|2	-	2	0.503027	0.479394	0	0	0	na	na
Gjd2	Gjd2	Q8BI71	Q8BI71	0|1	0|0	-	0.5	1.47077	1.39339	0	0	0	na	na
Gjd2	Gjd2	A2AFR3	A2AFR3	1|0	0|0	-	0.5	1.43815	1.36978	0	0	0	na	na
Gjd2	Gjd2	Q0VBL6	Q0VBL6	0|1	0|0	-	0.5	1.47077	1.39339	0	0	0	na	na
Gjd2	Gjd2	Q9QXZ0	Q9QXZ0	1|0	0|0	-	0.5	1.43815	1.36978	0	0	0	na	na
Gjd2	Gjd2	Q8K007	Q8K007	0|4	0|6	-	2	0.728531	0.551665	0	0	0	na	na
Gjd2	Gjd2	Q64511	Q64511	1|3	1|5	-	2	0.717676	0.674464	0	0	0	na	na
Gjd2	Gjd2	Q9DBM2	Q9DBM2	0|1	0|0	-	0.5	1.47077	1.39339	0	0	0	na	na
Gjd2	Gjd2	Q8BZB3	Q8BZB3	1|0	0|0	-	0.5	1.43815	1.36978	0	0	0	na	na
Gjd2	Gjd2	Q03265	Q03265	15|9	16|7	-	12	0.939687	0.921129	0	0	0	na	na
Gjd2	Gjd2	Q9WTN3	Q9WTN3	2|2	3|1	-	2	0.934666	0.934415	0	0	0	na	na
Gjd2	Gjd2	Q99LH1	Q99LH1	4|6	3|11	-	5	0.702086	0.688994	0	0	0	na	na
Gjd2	Gjd2	B2RQC2	B2RQC2	0|2	0|4	-	1	0.653367	0.571399	0	0	0	na	na
Gjd2	Gjd2	Q9ERU9	Q9ERU9	4|1	3|5	-	2.5	0.646432	0.593121	0	0	0	na	na
Gjd2	Gjd2	P98083	P98083	0|1	0|0	-	0.5	1.47077	1.39339	0	0	0	na	na
Gjd2	Gjd2	P60710	P60710	16|8	15|7	-	12	0.97651	0.938725	0	0	0	na	na
Gjd2	Gjd2	Q3UXZ9	Q3UXZ9	0|1	0|1	-	0.5	0.985178	0.933347	0	0	0	na	na
Gjd2	Gjd2	P60867	P60867	1|0	0|0	-	0.5	1.43815	1.36978	0	0	0	na	na
Gjd2	Gjd2	Q8K310	Q8K310	9|11	7|12	-	10	0.967124	0.959896	0	0	0	na	na
Gjd2	Gjd2	Q8BG17	Q8BG17	0|1	0|0	-	0.5	1.47077	1.39339	0	0	0	na	na
Gjd2	Gjd2	Q9CS00	Q9CS00	0|1	0|1	-	0.5	0.985178	0.933347	0	0	0	na	na
Gjd2	Gjd2	Q04447	Q04447	1|1	4|0	-	1	0.63017	0.630078	0	0	0	na	na
Gjd2	Gjd2	P62830	P62830	3|6	3|5	-	4.5	1.03062	0.985114	0	0	0	na	na
Gjd2	Gjd2	Q9Z1T1	Q9Z1T1	1|0	0|0	-	0.5	1.43815	1.36978	0	0	0	na	na
Gjd2	Gjd2	Q71LX4	Q71LX4	0|1	0|0	-	0.5	1.47077	1.39339	0	0	0	na	na
Gjd2	Gjd2	Q8BUH8	Q8BUH8	1|0	2|2	-	0.5	0.479319	0.456532	0	0	0	na	na
Gjd2	Gjd2	P20152	P20152	2|2	6|1	-	2	0.621118	0.620952	0	0	0	na	na
Gjd2	Gjd2	Q91WB4	Q91WB4	7|4	6|5	-	5.5	0.914236	0.895954	0	0	0	na	na
Gjd2	Gjd2	Q68ED3	Q68ED3	0|1	0|0	-	0.5	1.47077	1.39339	0	0	0	na	na
Gjd2	Gjd2	P97434	P97434	0|1	0|0	-	0.5	1.47077	1.39339	0	0	0	na	na
Gjd2	Gjd2	P97432	P97432	0|1	0|0	-	0.5	1.47077	1.39339	0	0	0	na	na
Gjd2	Gjd2	Q9CR62	Q9CR62	1|0	3|0	-	0.5	0.570262	0.543152	0	0	0	na	na
Gjd2	Gjd2	Q9R269	Q9R269	1|0	0|0	-	0.5	1.43815	1.36978	0	0	0	na	na
Gjd2	Gjd2	P04426	P04426	1|0	0|0	-	0.5	1.43815	1.36978	0	0	0	na	na
Gjd2	Gjd2	O88704	O88704	1|0	0|0	-	0.5	1.43815	1.36978	0	0	0	na	na
Gjd2	Gjd2	P59326	P59326	1|0	0|0	-	0.5	1.43815	1.36978	0	0	0	na	na
Gjd2	Gjd2	P59242	P59242	0|1	0|0	-	0.5	1.47077	1.39339	0	0	0	na	na
Gjd2	Gjd2	Q3TNU4	Q3TNU4	0|1	0|0	-	0.5	1.47077	1.39339	0	0	0	na	na
Gjd2	Gjd2	P63276	P63276	2|2	3|1	-	2	0.934666	0.934415	0	0	0	na	na
Gjd2	Gjd2	O70318	O70318	10|18	13|23	-	14	0.731864	0.699212	0	0	0	na	na
Gjd2	Gjd2	Q8CI11	Q8CI11	35|21	41|20	-	28	0.828287	0.810205	0	0	0	na	na
Gjd2	Gjd2	Q9JL61	Q9JL61	1|0	0|0	-	0.5	1.43815	1.36978	0	0	0	na	na
Gjd2	Gjd2	Q3UHL1	Q3UHL1	3|2	2|5	-	2.5	0.72693	0.722147	0	0	0	na	na
Gjd2	Gjd2	Q9EPN1	Q9EPN1	1|1	0|0	-	1	1.90892	1.90864	0	0	0	na	na
Gjd2	Gjd2	O54824	O54824	0|1	0|0	-	0.5	1.47077	1.39339	0	0	0	na	na
Gjd2	Gjd2	Q64707	Q64707	2|4	2|6	-	3	0.756111	0.728493	0	0	0	na	na
Gjd2	Gjd2	Q8BX70	Q8BX70	1|1	1|1	-	1	0.954364	0.954224	0	0	0	na	na
Gjd2	Gjd2	Q9R1B9	Q9R1B9	6|16	1|25	-	11	0.807044	0.72499	0	0	0	na	na
Gjd2	Gjd2	Q9JLN9	Q9JLN9	0|1	0|0	-	0.5	1.47077	1.39339	0	0	0	na	na
Gjd2	Gjd2	Q64339	Q64339	1|0	1|0	-	0.5	0.954121	0.908762	0	0	0	na	na
Gjd2	Gjd2	Q8JZN7	Q8JZN7	1|0	0|0	-	0.5	1.43815	1.36978	0	0	0	na	na
Gjd2	Gjd2	Q8BFR5	Q8BFR5	5|0	7|0	-	2.5	0.70109	0.509721	0	0	0	na	na
Gjd2	Gjd2	Q6PDJ1	Q6PDJ1	0|1	0|0	-	0.5	1.47077	1.39339	0	0	0	na	na
Gjd2	Gjd2	P43006	P43006	1|0	1|0	-	0.5	0.954121	0.908762	0	0	0	na	na
Gjd2	Gjd2	O70556	O70556	1|0	0|0	-	0.5	1.43815	1.36978	0	0	0	na	na
Gjd2	Gjd2	Q8BWU1	Q8BWU1	0|1	0|0	-	0.5	1.47077	1.39339	0	0	0	na	na
Gjd2	Gjd2	P50446	P50446	0|18	19|11	-	9	0.58988	0.26378	0	0	0	na	na
Gjd2	Gjd2	Q91WK7	Q91WK7	1|0	0|0	-	0.5	1.43815	1.36978	0	0	0	na	na
Gjd2	Gjd2	Q61191	Q61191	6|2	6|4	-	4	0.759788	0.706112	0	0	0	na	na
